# Supplementary material for: AI-NERD: Elucidation of relaxation dynamics beyond equilibrium through AI-informed X-ray photon correlation spectroscopy
Source: Nat Commun. 2024 Jul 15;15:5945. doi: 10.1038/s41467-024-49381-z (PMC11251071; doi:10.1038/s41467-024-49381-z)
Supplement: Supplementary file 4 — Source Data [file 41467_2024_49381_MOESM4_ESM.xlsx]

## Sheet: Fig1e
UMAP Dim 1	UMAP Dim 2
12.8103	2.07368
15.1461	11.6992
16.3349	11.3407
-4.32522	-1.40326
13.7679	11.846
12.7086	11.7985
11.3467	12.2639
10.4548	12.8001
11.9897	12.0331
10.1478	11.8179
8.6782	12.6247
8.20012	11.0886
8.02624	12.3012
7.30358	12.4587
5.97646	13.3784
5.42166	13.3011
4.53839	13.2764
1.98078	9.42282
4.25669	12.5533
3.55809	12.1242
11.3659	12.094
0.0740011	8.23459
2.35563	5.82178
2.57308	1.71737
3.81052	4.14757
3.36309	6.57152
5.9834	10.3338
5.03284	11.433
8.91119	10.7128
4.06583	9.50799
4.63181	9.60716
3.86924	7.79217
9.99073	12.2494
5.06513	10.1857
2.51966	7.83771
2.15004	4.15697
0.95683	7.55279
1.67655	7.07518
2.75976	9.43621
2.57295	10.315
2.4322	8.32775
6.42852	11.611
1.18101	9.43816
5.10932	3.16352
4.36048	1.15876
0.753274	5.73257
1.55786	6.40039
3.28391	6.79356
3.75671	10.8052
7.8806	12.3783
12.8172	2.0546
15.9467	11.3967
16.7964	11.4518
-4.52902	-1.24916
13.3257	11.8529
12.7908	12.0219
10.7951	12.2613
10.7825	13.1722
11.4327	12.0244
8.86617	13.0148
9.19186	11.3824
7.61135	11.0791
8.65729	11.4522
6.9309	12.9267
6.29986	13.4413
4.89363	13.3477
5.09387	12.9559
1.67147	9.484
4.08045	12.3381
3.5976	12.2625
8.13515	11.3064
0.425757	8.34213
3.0856	7.7299
2.59148	1.58379
2.58984	5.49973
0.521676	5.54123
2.07362	7.56941
4.2242	11.0491
6.68823	9.84888
5.80399	8.45541
5.1824	10.7899
5.13998	9.86396
8.58765	11.7027
2.14036	5.01494
2.49732	7.60671
3.50006	5.83598
0.464787	6.78987
2.91634	1.87424
1.47157	7.56654
4.41079	10.2402
0.971376	10.0115
7.6444	11.4841
2.01785	5.8956
5.49417	1.9992
3.52097	2.17926
0.678901	8.16304
2.02168	8.4952
3.54112	2.00416
2.64969	10.0498
8.72324	10.6907
13.206	1.80679
14.4076	11.5573
16.5607	11.1028
-4.63446	-1.16007
13.374	11.9844
12.6691	11.9491
11.3156	12.307
10.8284	13.0978
12.252	12.1093
10.2938	13.3069
7.56113	12.1734
7.83055	11.1317
8.99899	11.451
6.98247	12.9327
5.82655	13.4851
4.80473	12.5376
4.35976	11.2293
0.618783	5.71925
2.30319	10.1846
3.83786	12.1066
7.63884	11.3509
0.88492	7.32341
2.26789	5.74943
3.09208	3.52535
1.2468	6.77437
0.708352	5.42393
4.24048	10.2777
0.90073	8.08072
6.69683	9.74244
5.77601	8.25993
2.34918	10.5682
5.08558	10.0359
5.76958	10.999
4.16904	8.72437
1.01591	6.93017
3.44599	5.90457
1.797	7.56149
2.88716	3.33765
2.52816	9.37157
5.31253	11.3605
1.83408	6.19597
4.41522	10.4108
3.76913	4.90803
5.20093	2.97434
3.29534	1.9128
0.991356	10.1096
4.63201	10.3849
3.78927	4.83896
2.7247	7.20532
4.16227	10.1471
13.6349	1.59046
14.5081	11.6075
16.783	11.2716
-4.49462	-1.28724
13.5435	12.0495
12.5146	11.6997
10.5974	12.4258
10.7228	13.0971
11.693	12.0778
10.148	13.4327
8.55439	12.1739
3.85379	11.0292
2.32446	7.2161
6.89867	10.2981
3.65641	10.9871
1.20765	8.47306
2.66408	7.03799
3.15548	7.41641
3.09048	8.98036
2.60597	11.3208
9.97519	12.3847
4.36304	6.24753
4.26941	5.64439
2.60116	1.57294
2.39278	3.61517
2.16408	6.60272
2.59803	8.41215
0.709321	8.08984
4.96559	10.8565
4.79176	6.29123
4.51837	8.66832
5.04367	8.54737
4.65521	4.21715
4.33536	0.857336
3.36358	6.09723
4.01874	5.63062
0.871754	6.6403
2.68617	3.10858
1.49873	8.42744
7.51277	12.0322
4.5896	6.00195
7.75947	12.063
3.40767	2.05689
4.51049	3.53745
3.58782	1.98796
0.818526	5.86915
7.24488	11.0927
1.79484	6.8602
3.15824	7.54149
1.92777	8.01642
13.6091	1.63457
15.1888	11.7065
16.306	11.2379
-4.51055	-1.26006
11.8435	12.2573
11.7688	11.6513
10.2537	12.371
8.85183	13.1406
11.0214	11.9591
5.63158	13.1514
9.16465	10.9928
2.2477	7.10687
5.53725	1.74996
1.21163	8.27979
1.50145	7.64687
3.38398	4.07014
3.79663	3.65311
1.76365	4.15833
6.44648	11.286
2.27786	5.72779
11.0531	11.7493
5.36275	6.59634
4.55666	3.14249
4.85016	2.65983
4.60459	3.43885
2.5139	7.00361
2.9777	5.28247
4.29642	5.11381
4.89459	9.82613
6.0675	9.89546
5.49084	5.38324
5.00219	8.46386
6.57881	10.8048
5.88215	8.3996
4.70782	2.02631
3.43027	3.84489
0.559246	5.5372
4.93758	5.00063
2.18407	5.03635
7.06644	9.89861
5.56708	1.87196
8.88155	13.1247
4.42719	3.49425
5.07491	1.71612
4.83368	2.37998
1.32329	6.29912
4.94369	10.5526
2.86816	7.79709
3.30508	5.37857
2.05437	4.85019
13.6378	1.63208
15.2149	11.6782
16.3388	11.2298
-4.48116	-1.29618
12.0872	12.2366
10.4044	12.415
9.56945	13.1538
8.40032	13.1275
8.61612	10.486
6.00025	11.9936
8.12914	12.6812
4.06847	5.37804
6.10415	10.7623
4.03119	10.0095
1.59036	8.81617
3.44993	10.5941
3.53056	10.4384
0.821472	6.2914
7.34008	11.3973
3.63048	3.7883
11.5929	11.5169
5.83449	8.15195
5.96755	3.29485
4.75863	2.30823
4.7391	3.01168
2.06493	4.82258
4.81072	6.07915
0.792656	5.20248
2.65472	6.13759
6.39433	11.7256
4.44591	6.14691
5.34093	7.36648
2.52918	8.84868
3.32508	6.80266
4.62952	1.5437
4.2679	3.87411
3.0442	3.39092
4.9825	5.10038
1.8294	7.33828
7.79627	12.6152
4.36452	3.58664
8.47778	12.6412
2.67773	1.72401
5.88928	3.317
5.78119	3.52223
4.87648	6.03153
4.28211	11.3629
2.44121	10.6849
2.73946	1.7088
4.77132	9.90779
13.4953	1.72585
14.5268	11.5084
16.4008	11.0749
-4.542	-1.24847
11.7669	12.0619
8.16983	11.6473
2.89766	9.9928
5.1777	11.4299
9.61807	11.7391
4.59179	10.8019
7.94671	11.6497
4.45412	11.0801
7.35039	11.0689
4.81516	11.5714
6.72796	10.3898
4.77237	12.6562
3.33566	12.1315
2.00102	6.72583
3.4412	11.7599
1.16531	9.32654
11.683	11.4665
0.875766	6.05573
5.64075	3.15228
5.5841	1.2395
5.51696	7.06449
3.01457	7.6122
2.72748	7.05659
2.3747	10.3346
5.92448	11.2069
5.62461	1.30643
3.7757	9.763
4.96939	2.96514
8.5984	10.9086
4.50684	8.73987
3.29325	6.32416
4.32435	0.801659
3.93699	4.04933
2.87167	7.68402
2.53854	1.58363
4.84672	11.1776
3.7733	7.4529
10.5022	12.2392
3.78333	7.90006
5.31119	6.89059
5.1926	1.62433
4.79496	2.63485
2.30306	10.41
1.94615	5.05896
2.32831	8.30624
7.27207	10.0315
13.1759	1.79324
14.6157	11.5083
16.6894	11.4699
-4.38162	-1.39691
11.0011	12.1098
10.0743	12.3396
8.95025	12.9708
9.0265	11.7411
12.0548	12.2006
3.62598	11.8658
8.34313	12.1517
3.59467	11.3165
7.47449	12.7158
6.02574	12.294
5.46779	13.2245
5.72268	13.3989
4.83772	13.1223
0.699103	8.84788
5.37332	12.8562
4.15066	11.5162
11.7818	11.5084
0.136042	8.23338
3.65762	2.93905
5.25767	2.84248
4.3513	3.3138
3.86937	2.50386
2.33616	4.3103
2.4996	10.4178
7.2586	11.8419
5.21669	8.93113
3.54981	9.18875
4.17938	2.76729
8.36332	12.5151
3.23275	7.00331
1.6481	4.35913
3.38599	6.22759
5.45648	5.62002
2.29501	7.32316
1.22868	7.15193
7.60632	11.3359
1.16257	10.0536
9.50118	12.0846
2.62119	7.06961
5.36358	2.66472
5.36575	6.89401
4.25876	6.5531
2.65002	3.31634
1.78954	5.18843
2.87332	10.1056
7.6546	12.0536
12.9027	1.98116
14.6742	11.4281
16.6328	11.5454
-4.40509	-1.34185
13.6909	11.9666
12.5932	11.5297
10.4273	12.7968
8.41404	13.1213
12.1986	12.0739
8.90331	11.9308
8.01176	12.3389
7.42721	11.4626
9.85858	11.502
6.63154	12.7752
6.39668	13.411
4.25755	13.1565
4.62853	13.3551
0.736513	8.83115
5.75547	13.0224
3.52082	12.4119
9.80177	13.0738
1.67478	10.0402
2.57961	4.22117
5.14497	4.91364
3.62468	6.33641
4.48349	4.7628
2.28064	7.21427
5.15521	10.7203
9.90789	11.6506
5.30773	9.32749
2.30629	8.43647
3.50658	4.98534
8.45655	12.8476
5.4645	10.3214
1.13807	7.84027
3.2335	6.01399
1.30633	7.35277
0.582113	5.5198
2.45167	9.28863
4.61958	11.0318
1.03717	9.89234
9.69259	12.7251
1.0096	9.27593
5.30715	4.03143
4.12143	3.96386
3.43939	7.12437
4.90177	5.8981
1.89432	5.35953
3.13992	10.3841
8.61657	10.636
12.8556	2.01589
15.0424	11.6586
16.4235	11.2279
-4.13975	-1.50428
13.6921	12.0809
12.6152	11.5358
11.3809	12.4659
10.2052	13.1526
12.1479	12.0708
8.74559	13.0811
7.85181	12.3221
8.03014	10.8538
6.42177	12.2572
6.45839	12.5559
7.39021	12.6053
5.84058	13.3429
4.36339	13.3193
1.32143	6.14712
6.63966	10.4755
3.49083	12.5504
10.9032	11.8575
1.79825	9.97825
3.23606	7.88704
3.17685	3.41518
4.26534	4.86194
5.44165	5.33983
2.76815	9.96626
6.33875	10.56
9.50329	11.1049
5.71156	9.44561
3.16492	6.93678
5.75317	10.0594
9.25924	12.093
2.36072	5.56267
2.56083	7.88475
4.74998	7.95239
0.70858	6.93836
0.765214	5.59107
2.67096	9.28059
4.64204	10.2036
2.96636	6.34933
6.03246	11.4108
1.00968	9.39138
5.11995	3.13646
5.33973	5.12566
2.89417	8.52812
1.25002	6.98856
1.26386	8.85447
2.72163	9.47468
7.54993	11.284
13.0078	1.89997
15.5816	11.5454
16.6788	11.328
-3.92099	-1.6061
13.4978	11.8865
13.5673	11.8434
10.7293	12.3467
10.9417	12.9085
11.8681	11.8244
10.3282	13.2824
9.2006	11.6298
8.49123	11.2564
8.5969	11.5771
6.76933	12.9766
6.02976	13.4964
4.34865	13.2105
5.12004	13.0182
0.955964	8.24236
5.12298	10.9426
3.73587	12.2299
7.21327	11.4029
0.305481	7.60947
2.39291	4.44487
0.640247	5.30021
1.9651	3.8376
2.80946	1.93131
1.60104	7.78457
3.83535	11.0053
8.28934	11.5274
5.67591	8.7468
6.47991	11.187
3.28601	6.50626
8.40341	12.7189
2.43016	6.22685
1.80937	7.02919
3.33972	7.47911
0.571554	6.23491
1.75372	6.856
1.32193	6.11043
3.87168	10.2844
0.956721	9.8431
5.66299	10.9513
2.10299	6.26215
5.07724	3.00263
4.3183	5.52161
1.6261	7.51597
2.36603	8.92538
4.35996	0.790903
2.76695	9.67279
8.69239	11.3885
13.3037	1.74575
14.5908	11.6614
16.259	11.1981
-3.84802	-1.61482
13.2212	11.8953
12.6315	11.7048
11.4786	12.1643
11.0993	12.6914
11.1527	11.984
10.3601	13.119
8.73368	11.8344
7.95391	10.9774
8.56521	10.6645
6.702	12.9786
6.14266	13.3598
4.52505	11.582
4.17892	11.2807
5.2473	5.87254
4.33231	10.5431
4.02258	11.76
6.89813	11.5762
0.890787	6.39436
3.10933	7.86849
3.73653	4.62384
2.04665	3.81144
1.46487	7.99365
5.83063	10.2458
2.26084	9.9618
8.61844	11.5555
3.4672	1.82439
5.04619	10.9447
2.13672	8.54666
5.32419	10.3622
5.04901	9.87407
1.19923	7.24938
3.60496	5.78289
0.835162	7.17951
2.78074	3.25114
2.7324	9.37975
6.17284	11.3814
1.02733	10.0672
7.05238	10.1516
5.27594	4.55926
4.55802	3.46957
3.79958	3.5502
1.82658	9.97428
3.18351	10.2358
4.77348	7.51111
3.74475	10.7092
4.30041	10.2232
13.466	1.72496
14.5344	11.579
16.6401	11.2785
-3.6628	-1.72459
13.3131	12.0265
12.2305	11.7397
12.1349	11.4909
10.8546	12.8918
11.6897	12.1957
10.3079	13.4275
7.50924	12.2958
4.73178	10.6196
8.76068	10.373
6.65341	10.3471
3.5451	11.8672
1.07358	8.84547
2.39748	6.34359
3.29961	7.05312
2.3932	8.14468
2.50038	11.1005
9.67782	12.8452
4.19497	6.51838
3.87727	7.65179
3.33339	1.88462
2.16198	3.67692
1.81729	9.39676
2.33844	6.89417
1.48879	10.042
5.03946	11.0281
4.57487	4.70248
5.62539	10.2732
4.63285	3.91062
6.99625	11.4709
3.70779	3.3203
3.6273	2.14025
3.94037	5.71352
1.12172	7.1342
4.82461	4.70131
2.08249	5.02146
6.72318	11.879
3.90295	7.46112
8.22031	11.5378
4.30903	3.54315
5.29911	6.08684
3.19652	1.79527
0.637004	5.24497
7.12645	10.7925
2.63869	7.57675
1.9521	9.52497
2.35169	7.78639
13.529	1.67338
15.2586	11.7023
16.0914	11.2984
-3.66893	-1.67326
12.935	11.9856
11.8674	11.4836
8.80541	10.4555
10.4916	12.9762
9.5485	13.0242
7.65205	12.1564
7.46666	11.5987
2.30941	6.93524
4.80403	8.96167
1.23367	9.9711
3.20616	8.69463
3.53581	2.84726
3.49817	2.91314
1.80445	4.03355
5.2387	11.2779
3.4651	7.41646
10.8837	11.8268
5.4857	3.15296
5.07243	3.25337
4.50869	2.25709
4.30341	5.94945
1.93382	9.49205
3.52395	7.39484
3.69231	4.0069
3.11842	6.43385
3.04231	1.92714
4.61156	3.79072
5.14044	8.0214
6.13129	9.7124
5.2394	7.55945
5.08186	2.64173
3.02371	1.7142
0.569403	5.34272
3.33588	5.95398
2.33343	9.69242
6.62473	9.7704
4.33127	3.63423
8.5551	13.0471
4.97675	6.66569
5.60239	1.22088
5.49147	1.79789
2.42864	5.87339
4.02704	11.8859
1.80799	9.85211
3.14418	8.02613
4.40501	0.733643
12.9753	1.92303
15.3689	11.6836
16.2066	11.2018
-3.76907	-1.62304
12.5953	12.2191
10.683	12.2331
10.0972	13.1163
8.57496	13.0802
5.61208	1.20593
8.35809	10.6558
6.19445	10.0257
2.68489	7.513
5.77358	10.8027
3.272	10.0818
1.26383	8.5755
2.18575	10.2497
2.76578	10.7701
2.43248	7.87337
5.33338	10.7714
4.12757	6.45042
11.5206	11.6267
4.00052	6.74586
5.47471	6.98514
5.50879	2.98983
4.65404	1.85595
0.939754	9.66792
3.52018	5.1125
2.23498	7.53552
4.54033	9.54886
5.54111	11.2642
5.19099	5.97877
5.18715	4.95863
1.34071	6.19108
4.66157	5.13704
4.82611	5.60752
4.31249	5.08006
2.97664	7.68607
2.65516	3.17418
1.87042	7.27068
6.12753	11.47
4.69912	3.63959
8.33084	12.7241
4.97555	6.25459
5.21813	1.52269
5.94403	3.30011
4.85246	6.54565
2.3975	8.6265
2.17428	10.0428
1.07022	6.96119
6.00819	10.9799
12.8993	1.98361
15.4153	11.5966
16.4468	11.086
-4.07599	-1.5137
11.0919	11.9078
8.45518	11.7058
3.81443	11.097
6.18378	10.308
4.28916	0.685085
4.76291	10.6185
7.98055	12.3485
4.4728	10.7758
7.13002	10.7375
4.42619	12.3295
6.93103	10.5909
5.05814	12.8857
3.54326	12.3114
0.137969	7.95159
3.42193	11.9028
2.50473	11.1615
11.5996	11.4095
0.698678	7.6889
5.76365	3.36064
5.31727	1.57226
5.4669	7.0142
1.94289	6.42201
2.03787	8.2329
1.45257	8.32505
8.57494	10.7319
-3.7457	-1.67572
5.96974	10.1367
4.68057	5.07418
8.06731	12.3054
5.14727	10.2302
3.31869	6.32684
3.33295	6.17282
3.56549	6.9663
2.49891	1.52108
1.74544	7.13922
8.23023	11.2623
3.91168	7.65607
11.1869	12.0404
3.27643	7.54765
5.41985	6.90788
5.03716	1.64144
5.55661	3.89756
2.04438	4.7773
2.83922	7.11655
0.697282	8.12896
8.66665	10.3319
12.7886	2.09785
15.4711	11.6005
16.6154	11.4
-4.44674	-1.36686
12.588	11.6325
12.4884	11.5504
8.60458	12.8232
8.83247	11.4278
12.4979	12.2674
3.51785	11.4974
7.52361	10.9174
3.66576	11.2747
8.63819	11.945
7.11737	12.7929
6.0846	13.2532
5.22347	13.2966
3.94222	12.9686
1.92545	9.66314
4.60042	12.6268
3.18458	12.2623
11.9249	11.8857
0.489476	8.53198
3.46318	1.98717
4.53418	3.29643
4.61713	4.948
4.00883	5.11436
3.14243	8.61782
2.84301	10.3732
8.19191	12.191
6.43178	11.5415
3.22662	9.65011
4.36076	3.66842
10.4573	12.3208
2.55055	5.9428
1.77916	4.2482
4.13135	5.42248
5.41736	5.28477
0.599601	5.48091
1.13952	6.81269
7.54561	11.2781
1.80303	5.87541
9.70922	12.2389
1.24352	9.28313
5.47214	2.134
5.39531	2.99159
4.9042	5.79584
1.59717	6.59166
2.89673	6.89936
2.99824	9.82938
7.48529	10.5344
12.8016	2.07271
14.6957	11.4694
16.502	11.581
-4.35067	-1.43827
13.7908	11.9583
12.6768	11.675
10.0167	13.0514
10.5074	13.2793
11.2782	11.9646
8.6901	12.2241
8.07716	12.2747
8.24519	11.3078
9.10773	11.7848
6.76728	12.949
8.52943	12.031
5.8534	13.5309
5.16544	13.1133
1.05804	9.12838
4.47581	12.8948
3.43795	12.5414
9.55084	13.0053
0.109807	8.27459
3.36694	7.78162
4.97011	5.5666
4.33774	2.5695
5.17147	5.14267
1.59802	8.23873
3.73056	11.0879
10.1049	11.4961
6.20526	9.60656
4.84302	11.5578
4.44015	6.11473
8.53759	12.8657
5.74435	10.3091
1.82051	4.55006
3.30735	5.73915
3.08995	6.49045
0.675126	5.69686
2.18407	9.28051
4.64623	10.5955
1.18992	9.63027
10.0639	13.095
1.07642	9.37308
5.16657	3.67449
4.61264	5.3242
3.29935	6.52644
4.83313	5.61219
1.86276	5.83072
5.48462	10.9468
8.54508	10.706

## Sheet: Fig2a
UMAP Dim 1	UMAP Dim 2	Cluster Number
12.8103	2.07368	4
15.1461	11.6992	4
16.3349	11.3407	4
-4.32522	-1.40326	4
13.7679	11.846	4
12.7086	11.7985	4
11.3467	12.2639	4
10.4548	12.8001	4
11.9897	12.0331	4
10.1478	11.8179	4
8.6782	12.6247	4
8.20012	11.0886	3
8.02624	12.3012	4
7.30358	12.4587	4
5.97646	13.3784	3
5.42166	13.3011	3
4.53839	13.2764	3
1.98078	9.42282	3
4.25669	12.5533	3
3.55809	12.1242	3
11.3659	12.094	4
0.0740011	8.23459	2
2.35563	5.82178	2
2.57308	1.71737	1
3.81052	4.14757	1
3.36309	6.57152	2
5.9834	10.3338	3
5.03284	11.433	3
8.91119	10.7128	3
4.06583	9.50799	3
4.63181	9.60716	3
3.86924	7.79217	2
9.99073	12.2494	4
5.06513	10.1857	3
2.51966	7.83771	2
2.15004	4.15697	1
0.95683	7.55279	2
1.67655	7.07518	2
2.75976	9.43621	3
2.57295	10.315	3
2.4322	8.32775	2
6.42852	11.611	3
1.18101	9.43816	2
5.10932	3.16352	1
4.36048	1.15876	0
0.753274	5.73257	2
1.55786	6.40039	2
3.28391	6.79356	2
3.75671	10.8052	3
7.8806	12.3783	3
12.8172	2.0546	4
15.9467	11.3967	4
16.7964	11.4518	4
-4.52902	-1.24916	4
13.3257	11.8529	4
12.7908	12.0219	4
10.7951	12.2613	4
10.7825	13.1722	4
11.4327	12.0244	4
8.86617	13.0148	3
9.19186	11.3824	4
7.61135	11.0791	3
8.65729	11.4522	4
6.9309	12.9267	3
6.29986	13.4413	3
4.89363	13.3477	3
5.09387	12.9559	3
1.67147	9.484	3
4.08045	12.3381	3
3.5976	12.2625	3
8.13515	11.3064	3
0.425757	8.34213	2
3.0856	7.7299	2
2.59148	1.58379	1
2.58984	5.49973	2
0.521676	5.54123	2
2.07362	7.56941	2
4.2242	11.0491	3
6.68823	9.84888	3
5.80399	8.45541	3
5.1824	10.7899	3
5.13998	9.86396	3
8.58765	11.7027	4
2.14036	5.01494	2
2.49732	7.60671	2
3.50006	5.83598	2
0.464787	6.78987	2
2.91634	1.87424	1
1.47157	7.56654	2
4.41079	10.2402	3
0.971376	10.0115	2
7.6444	11.4841	3
2.01785	5.8956	2
5.49417	1.9992	0
3.52097	2.17926	1
0.678901	8.16304	2
2.02168	8.4952	2
3.54112	2.00416	1
2.64969	10.0498	3
8.72324	10.6907	3
13.206	1.80679	4
14.4076	11.5573	4
16.5607	11.1028	4
-4.63446	-1.16007	4
13.374	11.9844	4
12.6691	11.9491	4
11.3156	12.307	4
10.8284	13.0978	4
12.252	12.1093	4
10.2938	13.3069	4
7.56113	12.1734	4
7.83055	11.1317	3
8.99899	11.451	4
6.98247	12.9327	3
5.82655	13.4851	3
4.80473	12.5376	3
4.35976	11.2293	3
0.618783	5.71925	2
2.30319	10.1846	2
3.83786	12.1066	3
7.63884	11.3509	3
0.88492	7.32341	2
2.26789	5.74943	2
3.09208	3.52535	1
1.2468	6.77437	2
0.708352	5.42393	2
4.24048	10.2777	3
0.90073	8.08072	2
6.69683	9.74244	3
5.77601	8.25993	3
2.34918	10.5682	2
5.08558	10.0359	3
5.76958	10.999	3
4.16904	8.72437	2
1.01591	6.93017	2
3.44599	5.90457	2
1.797	7.56149	2
2.88716	3.33765	1
2.52816	9.37157	3
5.31253	11.3605	3
1.83408	6.19597	2
4.41522	10.4108	3
3.76913	4.90803	1
5.20093	2.97434	1
3.29534	1.9128	1
0.991356	10.1096	3
4.63201	10.3849	3
3.78927	4.83896	2
2.7247	7.20532	2
4.16227	10.1471	3
13.6349	1.59046	4
14.5081	11.6075	4
16.783	11.2716	4
-4.49462	-1.28724	4
13.5435	12.0495	4
12.5146	11.6997	4
10.5974	12.4258	4
10.7228	13.0971	4
11.693	12.0778	4
10.148	13.4327	4
8.55439	12.1739	4
3.85379	11.0292	3
2.32446	7.2161	2
6.89867	10.2981	3
3.65641	10.9871	3
1.20765	8.47306	2
2.66408	7.03799	2
3.15548	7.41641	2
3.09048	8.98036	2
2.60597	11.3208	2
9.97519	12.3847	4
4.36304	6.24753	2
4.26941	5.64439	2
2.60116	1.57294	1
2.39278	3.61517	1
2.16408	6.60272	2
2.59803	8.41215	2
0.709321	8.08984	2
4.96559	10.8565	3
4.79176	6.29123	2
4.51837	8.66832	2
5.04367	8.54737	3
4.65521	4.21715	1
4.33536	0.857336	0
3.36358	6.09723	2
4.01874	5.63062	2
0.871754	6.6403	2
2.68617	3.10858	1
1.49873	8.42744	2
7.51277	12.0322	4
4.5896	6.00195	2
7.75947	12.063	3
3.40767	2.05689	1
4.51049	3.53745	1
3.58782	1.98796	1
0.818526	5.86915	2
7.24488	11.0927	3
1.79484	6.8602	2
3.15824	7.54149	2
1.92777	8.01642	2
13.6091	1.63457	4
15.1888	11.7065	4
16.306	11.2379	4
-4.51055	-1.26006	4
11.8435	12.2573	4
11.7688	11.6513	4
10.2537	12.371	4
8.85183	13.1406	3
11.0214	11.9591	4
5.63158	13.1514	3
9.16465	10.9928	4
2.2477	7.10687	2
5.53725	1.74996	0
1.21163	8.27979	2
1.50145	7.64687	2
3.38398	4.07014	2
3.79663	3.65311	1
1.76365	4.15833	1
6.44648	11.286	3
2.27786	5.72779	2
11.0531	11.7493	4
5.36275	6.59634	2
4.55666	3.14249	1
4.85016	2.65983	1
4.60459	3.43885	1
2.5139	7.00361	2
2.9777	5.28247	2
4.29642	5.11381	2
4.89459	9.82613	3
6.0675	9.89546	3
5.49084	5.38324	2
5.00219	8.46386	3
6.57881	10.8048	3
5.88215	8.3996	3
4.70782	2.02631	1
3.43027	3.84489	1
0.559246	5.5372	2
4.93758	5.00063	2
2.18407	5.03635	2
7.06644	9.89861	3
5.56708	1.87196	0
8.88155	13.1247	3
4.42719	3.49425	1
5.07491	1.71612	0
4.83368	2.37998	1
1.32329	6.29912	2
4.94369	10.5526	3
2.86816	7.79709	2
3.30508	5.37857	2
2.05437	4.85019	1
13.6378	1.63208	4
15.2149	11.6782	4
16.3388	11.2298	4
-4.48116	-1.29618	4
12.0872	12.2366	4
10.4044	12.415	4
9.56945	13.1538	4
8.40032	13.1275	3
8.61612	10.486	3
6.00025	11.9936	3
8.12914	12.6812	3
4.06847	5.37804	2
6.10415	10.7623	3
4.03119	10.0095	3
1.59036	8.81617	2
3.44993	10.5941	3
3.53056	10.4384	3
0.821472	6.2914	2
7.34008	11.3973	3
3.63048	3.7883	1
11.5929	11.5169	4
5.83449	8.15195	3
5.96755	3.29485	1
4.75863	2.30823	1
4.7391	3.01168	1
2.06493	4.82258	2
4.81072	6.07915	2
0.792656	5.20248	2
2.65472	6.13759	2
6.39433	11.7256	3
4.44591	6.14691	2
5.34093	7.36648	2
2.52918	8.84868	2
3.32508	6.80266	2
4.62952	1.5437	0
4.2679	3.87411	1
3.0442	3.39092	1
4.9825	5.10038	2
1.8294	7.33828	2
7.79627	12.6152	3
4.36452	3.58664	1
8.47778	12.6412	3
2.67773	1.72401	1
5.88928	3.317	1
5.78119	3.52223	1
4.87648	6.03153	2
4.28211	11.3629	3
2.44121	10.6849	2
2.73946	1.7088	1
4.77132	9.90779	3
13.4953	1.72585	4
14.5268	11.5084	4
16.4008	11.0749	4
-4.542	-1.24847	4
11.7669	12.0619	4
8.16983	11.6473	3
2.89766	9.9928	2
5.1777	11.4299	3
9.61807	11.7391	4
4.59179	10.8019	3
7.94671	11.6497	3
4.45412	11.0801	3
7.35039	11.0689	3
4.81516	11.5714	3
6.72796	10.3898	3
4.77237	12.6562	3
3.33566	12.1315	3
2.00102	6.72583	2
3.4412	11.7599	3
1.16531	9.32654	2
11.683	11.4665	4
0.875766	6.05573	2
5.64075	3.15228	1
5.5841	1.2395	0
5.51696	7.06449	2
3.01457	7.6122	2
2.72748	7.05659	2
2.3747	10.3346	3
5.92448	11.2069	3
5.62461	1.30643	0
3.7757	9.763	3
4.96939	2.96514	1
8.5984	10.9086	3
4.50684	8.73987	2
3.29325	6.32416	2
4.32435	0.801659	0
3.93699	4.04933	1
2.87167	7.68402	2
2.53854	1.58363	1
4.84672	11.1776	3
3.7733	7.4529	2
10.5022	12.2392	4
3.78333	7.90006	2
5.31119	6.89059	3
5.1926	1.62433	0
4.79496	2.63485	1
2.30306	10.41	2
1.94615	5.05896	2
2.32831	8.30624	2
7.27207	10.0315	3
13.1759	1.79324	4
14.6157	11.5083	4
16.6894	11.4699	4
-4.38162	-1.39691	4
11.0011	12.1098	4
10.0743	12.3396	4
8.95025	12.9708	4
9.0265	11.7411	4
12.0548	12.2006	4
3.62598	11.8658	3
8.34313	12.1517	4
3.59467	11.3165	3
7.47449	12.7158	3
6.02574	12.294	3
5.46779	13.2245	3
5.72268	13.3989	3
4.83772	13.1223	3
0.699103	8.84788	2
5.37332	12.8562	3
4.15066	11.5162	3
11.7818	11.5084	4
0.136042	8.23338	2
3.65762	2.93905	1
5.25767	2.84248	1
4.3513	3.3138	1
3.86937	2.50386	1
2.33616	4.3103	1
2.4996	10.4178	3
7.2586	11.8419	3
5.21669	8.93113	3
3.54981	9.18875	3
4.17938	2.76729	1
8.36332	12.5151	3
3.23275	7.00331	2
1.6481	4.35913	1
3.38599	6.22759	2
5.45648	5.62002	2
2.29501	7.32316	2
1.22868	7.15193	2
7.60632	11.3359	3
1.16257	10.0536	3
9.50118	12.0846	4
2.62119	7.06961	2
5.36358	2.66472	1
5.36575	6.89401	2
4.25876	6.5531	2
2.65002	3.31634	1
1.78954	5.18843	2
2.87332	10.1056	2
7.6546	12.0536	4
12.9027	1.98116	4
14.6742	11.4281	4
16.6328	11.5454	4
-4.40509	-1.34185	4
13.6909	11.9666	4
12.5932	11.5297	4
10.4273	12.7968	4
8.41404	13.1213	3
12.1986	12.0739	4
8.90331	11.9308	4
8.01176	12.3389	4
7.42721	11.4626	3
9.85858	11.502	4
6.63154	12.7752	3
6.39668	13.411	3
4.25755	13.1565	1
4.62853	13.3551	3
0.736513	8.83115	2
5.75547	13.0224	3
3.52082	12.4119	3
9.80177	13.0738	4
1.67478	10.0402	3
2.57961	4.22117	1
5.14497	4.91364	2
3.62468	6.33641	2
4.48349	4.7628	2
2.28064	7.21427	2
5.15521	10.7203	3
9.90789	11.6506	4
5.30773	9.32749	3
2.30629	8.43647	2
3.50658	4.98534	1
8.45655	12.8476	3
5.4645	10.3214	3
1.13807	7.84027	2
3.2335	6.01399	2
1.30633	7.35277	2
0.582113	5.5198	2
2.45167	9.28863	3
4.61958	11.0318	3
1.03717	9.89234	3
9.69259	12.7251	4
1.0096	9.27593	2
5.30715	4.03143	1
4.12143	3.96386	1
3.43939	7.12437	2
4.90177	5.8981	2
1.89432	5.35953	2
3.13992	10.3841	3
8.61657	10.636	4
12.8556	2.01589	4
15.0424	11.6586	4
16.4235	11.2279	4
-4.13975	-1.50428	4
13.6921	12.0809	4
12.6152	11.5358	4
11.3809	12.4659	4
10.2052	13.1526	4
12.1479	12.0708	4
8.74559	13.0811	3
7.85181	12.3221	4
8.03014	10.8538	3
6.42177	12.2572	3
6.45839	12.5559	3
7.39021	12.6053	4
5.84058	13.3429	3
4.36339	13.3193	3
1.32143	6.14712	2
6.63966	10.4755	3
3.49083	12.5504	3
10.9032	11.8575	4
1.79825	9.97825	3
3.23606	7.88704	2
3.17685	3.41518	1
4.26534	4.86194	2
5.44165	5.33983	2
2.76815	9.96626	3
6.33875	10.56	3
9.50329	11.1049	4
5.71156	9.44561	3
3.16492	6.93678	2
5.75317	10.0594	3
9.25924	12.093	4
2.36072	5.56267	1
2.56083	7.88475	3
4.74998	7.95239	3
0.70858	6.93836	2
0.765214	5.59107	2
2.67096	9.28059	3
4.64204	10.2036	3
2.96636	6.34933	2
6.03246	11.4108	3
1.00968	9.39138	2
5.11995	3.13646	1
5.33973	5.12566	2
2.89417	8.52812	2
1.25002	6.98856	2
1.26386	8.85447	2
2.72163	9.47468	2
7.54993	11.284	3
13.0078	1.89997	4
15.5816	11.5454	4
16.6788	11.328	4
-3.92099	-1.6061	4
13.4978	11.8865	4
13.5673	11.8434	4
10.7293	12.3467	4
10.9417	12.9085	4
11.8681	11.8244	4
10.3282	13.2824	4
9.2006	11.6298	4
8.49123	11.2564	4
8.5969	11.5771	4
6.76933	12.9766	3
6.02976	13.4964	3
4.34865	13.2105	3
5.12004	13.0182	3
0.955964	8.24236	2
5.12298	10.9426	3
3.73587	12.2299	3
7.21327	11.4029	3
0.305481	7.60947	2
2.39291	4.44487	1
0.640247	5.30021	2
1.9651	3.8376	1
2.80946	1.93131	1
1.60104	7.78457	2
3.83535	11.0053	3
8.28934	11.5274	4
5.67591	8.7468	3
6.47991	11.187	3
3.28601	6.50626	2
8.40341	12.7189	3
2.43016	6.22685	2
1.80937	7.02919	2
3.33972	7.47911	2
0.571554	6.23491	2
1.75372	6.856	2
1.32193	6.11043	1
3.87168	10.2844	3
0.956721	9.8431	2
5.66299	10.9513	3
2.10299	6.26215	2
5.07724	3.00263	1
4.3183	5.52161	2
1.6261	7.51597	2
2.36603	8.92538	2
4.35996	0.790903	0
2.76695	9.67279	3
8.69239	11.3885	3
13.3037	1.74575	4
14.5908	11.6614	4
16.259	11.1981	4
-3.84802	-1.61482	4
13.2212	11.8953	4
12.6315	11.7048	4
11.4786	12.1643	4
11.0993	12.6914	4
11.1527	11.984	4
10.3601	13.119	4
8.73368	11.8344	4
7.95391	10.9774	3
8.56521	10.6645	3
6.702	12.9786	3
6.14266	13.3598	3
4.52505	11.582	3
4.17892	11.2807	3
5.2473	5.87254	2
4.33231	10.5431	3
4.02258	11.76	3
6.89813	11.5762	3
0.890787	6.39436	2
3.10933	7.86849	2
3.73653	4.62384	1
2.04665	3.81144	1
1.46487	7.99365	2
5.83063	10.2458	3
2.26084	9.9618	3
8.61844	11.5555	4
3.4672	1.82439	0
5.04619	10.9447	3
2.13672	8.54666	2
5.32419	10.3622	3
5.04901	9.87407	3
1.19923	7.24938	2
3.60496	5.78289	2
0.835162	7.17951	2
2.78074	3.25114	1
2.7324	9.37975	3
6.17284	11.3814	3
1.02733	10.0672	3
7.05238	10.1516	3
5.27594	4.55926	2
4.55802	3.46957	1
3.79958	3.5502	1
1.82658	9.97428	3
3.18351	10.2358	2
4.77348	7.51111	2
3.74475	10.7092	3
4.30041	10.2232	3
13.466	1.72496	4
14.5344	11.579	4
16.6401	11.2785	4
-3.6628	-1.72459	4
13.3131	12.0265	4
12.2305	11.7397	4
12.1349	11.4909	4
10.8546	12.8918	4
11.6897	12.1957	4
10.3079	13.4275	4
7.50924	12.2958	3
4.73178	10.6196	3
8.76068	10.373	3
6.65341	10.3471	3
3.5451	11.8672	3
1.07358	8.84547	2
2.39748	6.34359	2
3.29961	7.05312	2
2.3932	8.14468	2
2.50038	11.1005	2
9.67782	12.8452	4
4.19497	6.51838	2
3.87727	7.65179	2
3.33339	1.88462	1
2.16198	3.67692	1
1.81729	9.39676	2
2.33844	6.89417	2
1.48879	10.042	3
5.03946	11.0281	3
4.57487	4.70248	2
5.62539	10.2732	3
4.63285	3.91062	1
6.99625	11.4709	3
3.70779	3.3203	1
3.6273	2.14025	1
3.94037	5.71352	2
1.12172	7.1342	2
4.82461	4.70131	1
2.08249	5.02146	2
6.72318	11.879	3
3.90295	7.46112	2
8.22031	11.5378	3
4.30903	3.54315	1
5.29911	6.08684	1
3.19652	1.79527	0
0.637004	5.24497	2
7.12645	10.7925	3
2.63869	7.57675	2
1.9521	9.52497	3
2.35169	7.78639	2
13.529	1.67338	4
15.2586	11.7023	4
16.0914	11.2984	4
-3.66893	-1.67326	4
12.935	11.9856	4
11.8674	11.4836	4
8.80541	10.4555	4
10.4916	12.9762	4
9.5485	13.0242	4
7.65205	12.1564	4
7.46666	11.5987	3
2.30941	6.93524	2
4.80403	8.96167	3
1.23367	9.9711	3
3.20616	8.69463	2
3.53581	2.84726	1
3.49817	2.91314	1
1.80445	4.03355	1
5.2387	11.2779	3
3.4651	7.41646	2
10.8837	11.8268	4
5.4857	3.15296	1
5.07243	3.25337	1
4.50869	2.25709	1
4.30341	5.94945	2
1.93382	9.49205	3
3.52395	7.39484	2
3.69231	4.0069	1
3.11842	6.43385	2
3.04231	1.92714	1
4.61156	3.79072	1
5.14044	8.0214	2
6.13129	9.7124	3
5.2394	7.55945	3
5.08186	2.64173	1
3.02371	1.7142	1
0.569403	5.34272	2
3.33588	5.95398	1
2.33343	9.69242	3
6.62473	9.7704	3
4.33127	3.63423	1
8.5551	13.0471	3
4.97675	6.66569	2
5.60239	1.22088	0
5.49147	1.79789	0
2.42864	5.87339	2
4.02704	11.8859	3
1.80799	9.85211	3
3.14418	8.02613	2
4.40501	0.733643	0
12.9753	1.92303	4
15.3689	11.6836	4
16.2066	11.2018	4
-3.76907	-1.62304	4
12.5953	12.2191	4
10.683	12.2331	4
10.0972	13.1163	4
8.57496	13.0802	3
5.61208	1.20593	0
8.35809	10.6558	3
6.19445	10.0257	3
2.68489	7.513	2
5.77358	10.8027	3
3.272	10.0818	3
1.26383	8.5755	2
2.18575	10.2497	2
2.76578	10.7701	2
2.43248	7.87337	2
5.33338	10.7714	3
4.12757	6.45042	2
11.5206	11.6267	4
4.00052	6.74586	2
5.47471	6.98514	3
5.50879	2.98983	1
4.65404	1.85595	1
0.939754	9.66792	3
3.52018	5.1125	2
2.23498	7.53552	2
4.54033	9.54886	2
5.54111	11.2642	3
5.19099	5.97877	2
5.18715	4.95863	2
1.34071	6.19108	1
4.66157	5.13704	2
4.82611	5.60752	2
4.31249	5.08006	2
2.97664	7.68607	2
2.65516	3.17418	1
1.87042	7.27068	2
6.12753	11.47	3
4.69912	3.63959	1
8.33084	12.7241	3
4.97555	6.25459	2
5.21813	1.52269	0
5.94403	3.30011	1
4.85246	6.54565	2
2.3975	8.6265	2
2.17428	10.0428	3
1.07022	6.96119	2
6.00819	10.9799	3
12.8993	1.98361	4
15.4153	11.5966	4
16.4468	11.086	4
-4.07599	-1.5137	4
11.0919	11.9078	4
8.45518	11.7058	4
3.81443	11.097	3
6.18378	10.308	3
4.28916	0.685085	0
4.76291	10.6185	3
7.98055	12.3485	4
4.4728	10.7758	3
7.13002	10.7375	3
4.42619	12.3295	3
6.93103	10.5909	3
5.05814	12.8857	3
3.54326	12.3114	3
0.137969	7.95159	2
3.42193	11.9028	3
2.50473	11.1615	2
11.5996	11.4095	4
0.698678	7.6889	2
5.76365	3.36064	1
5.31727	1.57226	0
5.4669	7.0142	2
1.94289	6.42201	2
2.03787	8.2329	2
1.45257	8.32505	2
8.57494	10.7319	3
-3.7457	-1.67572	4
5.96974	10.1367	3
4.68057	5.07418	2
8.06731	12.3054	4
5.14727	10.2302	3
3.31869	6.32684	2
3.33295	6.17282	2
3.56549	6.9663	2
2.49891	1.52108	1
1.74544	7.13922	2
8.23023	11.2623	4
3.91168	7.65607	2
11.1869	12.0404	4
3.27643	7.54765	2
5.41985	6.90788	2
5.03716	1.64144	0
5.55661	3.89756	1
2.04438	4.7773	1
2.83922	7.11655	2
0.697282	8.12896	2
8.66665	10.3319	3
12.7886	2.09785	4
15.4711	11.6005	4
16.6154	11.4	4
-4.44674	-1.36686	4
12.588	11.6325	4
12.4884	11.5504	4
8.60458	12.8232	3
8.83247	11.4278	4
12.4979	12.2674	4
3.51785	11.4974	3
7.52361	10.9174	4
3.66576	11.2747	3
8.63819	11.945	4
7.11737	12.7929	3
6.0846	13.2532	3
5.22347	13.2966	3
3.94222	12.9686	1
1.92545	9.66314	3
4.60042	12.6268	3
3.18458	12.2623	2
11.9249	11.8857	4
0.489476	8.53198	2
3.46318	1.98717	1
4.53418	3.29643	1
4.61713	4.948	2
4.00883	5.11436	2
3.14243	8.61782	2
2.84301	10.3732	3
8.19191	12.191	4
6.43178	11.5415	3
3.22662	9.65011	3
4.36076	3.66842	1
10.4573	12.3208	4
2.55055	5.9428	2
1.77916	4.2482	1
4.13135	5.42248	2
5.41736	5.28477	2
0.599601	5.48091	2
1.13952	6.81269	1
7.54561	11.2781	3
1.80303	5.87541	2
9.70922	12.2389	4
1.24352	9.28313	2
5.47214	2.134	0
5.39531	2.99159	1
4.9042	5.79584	2
1.59717	6.59166	2
2.89673	6.89936	2
2.99824	9.82938	2
7.48529	10.5344	3
12.8016	2.07271	4
14.6957	11.4694	4
16.502	11.581	4
-4.35067	-1.43827	4
13.7908	11.9583	4
12.6768	11.675	4
10.0167	13.0514	4
10.5074	13.2793	4
11.2782	11.9646	4
8.6901	12.2241	4
8.07716	12.2747	4
8.24519	11.3078	3
9.10773	11.7848	4
6.76728	12.949	4
8.52943	12.031	4
5.8534	13.5309	3
5.16544	13.1133	3
1.05804	9.12838	3
4.47581	12.8948	3
3.43795	12.5414	1
9.55084	13.0053	4
0.109807	8.27459	2
3.36694	7.78162	2
4.97011	5.5666	2
4.33774	2.5695	1
5.17147	5.14267	2
1.59802	8.23873	2
3.73056	11.0879	3
10.1049	11.4961	4
6.20526	9.60656	3
4.84302	11.5578	3
4.44015	6.11473	2
8.53759	12.8657	3
5.74435	10.3091	3
1.82051	4.55006	1
3.30735	5.73915	2
3.08995	6.49045	2
0.675126	5.69686	2
2.18407	9.28051	3
4.64623	10.5955	3
1.18992	9.63027	3
10.0639	13.095	4
1.07642	9.37308	2
5.16657	3.67449	1
4.61264	5.3242	2
3.29935	6.52644	2
4.83313	5.61219	2
1.86276	5.83072	2
5.48462	10.9468	3
8.54508	10.706	4

## Sheet: Fig3a
t [s]	Shear Stress [Pa]
0	16526
1	15950
2	16174
3	16374
4	16916
5	16000
6	15625
7	15619
8	15678
9	15595
10	15304
11	14677
12	14622
13	14644
14	14331
15	14587
16	14720
17	14551
18	14026
19	13925
20	13849
21	13378
22	13503
23	13299
24	13462
25	13147
26	13016
27	13127
28	12995
29	12684
30	12648
31	12626
32	12431
33	12437
34	12546
35	12444
36	12395
37	12494
38	12512
39	12417
40	12405
41	12474
42	12632
43	12636
44	12696
45	12347
46	12486
47	12530
48	12119
49	12071
50	11670
51	11485
52	11690
53	11851
54	11774
55	11834
56	11448
57	11570
58	11597
59	11938
60	12220
61	11739
62	11486
63	11813
64	11908
65	11805
66	11952
67	11823
68	11993
69	11897
70	11597
71	11887
72	11779
73	11675
74	11586
75	11557
76	11789
77	11737
78	11406
79	11172
80	10981
81	11163
82	11266
83	11254
84	10913
85	10907
86	10778
87	11138
88	11238
89	11323
90	11383
91	11344
92	11490
93	11435
94	11411
95	11456
96	11568
97	11287
98	11340
99	11532
100	11403
101	11345
102	11118
103	11117
104	11351
105	11487
106	11542
107	11354
108	11064
109	11213
110	11140
111	11450
112	11519
113	11450
114	11463
115	11407
116	11285
117	11340
118	11270
119	11388
120	11217
121	11093
122	11225
123	11248
124	11163
125	10914
126	10928
127	10788
128	11002
129	10998
130	10958
131	10538
132	10539
133	10740
134	10622
135	10892
136	10724
137	10378
138	10565
139	10685
140	10725
141	10612
142	10497
143	10410
144	10402
145	10447
146	10300
147	10248
148	10199
149	10337
150	10301
151	10336
152	10332
153	10284
154	10583
155	10764
156	10666
157	10459
158	10843
159	10959
160	10783
161	10880
162	10433
163	10650
164	10741
165	10502
166	10907
167	11012
168	11153
169	11006
170	11209
171	10992
172	11155
173	11342
174	11268
175	11098
176	10952
177	11156
178	11171
179	11243
180	11296
181	11197
182	10737
183	10869
184	11344
185	11403
186	11354
187	11406
188	11356
189	11300
190	40766
191	36080
192	33576
193	32645
194	28970
195	27326
196	25421
197	24699
198	23338
199	22678
209	192.94
219	152.03
229	135.56
239	126.84
249	120.02
259	114.8
269	110.1
279	106.62
289	103.61
299	101.07
309	98.969
319	96.887
329	95.282
339	93.78
349	92.812
359	91.915
369	90.97
379	90.194
389	89.851
399	89.229
409	88.883
419	88.697
429	88.598
439	88.01
449	87.712
459	87.561
469	87.785
479	87.8
489	87.71
499	87.847
509	87.796
519	87.561
529	87.372
539	87.295
549	87.137
559	87.239
569	87.167
579	87.308
589	87.326
599	87.346
609	87.588
619	87.777
629	87.677
639	87.626
649	87.909
659	87.718
669	87.628
679	87.604
689	87.616
699	87.389
709	87.062
719	86.933
729	86.303
739	85.892
749	85.629
759	85.538
769	85.247
779	84.118
789	82.161
799	82.062
809	82.294
819	83.019
829	83.614
839	84.236
849	84.776
859	85.103
869	85.334
879	85.724
889	86.214
899	86.446
909	86.544
919	86.766
929	86.973
939	87.199
949	87.221
959	87.256
969	87.016
979	86.26
989	84.842
999	83.093
1009	81.957
1019	81.175
1029	81.093
1039	81.262
1049	81.117
1059	80.839
1069	81.225
1079	81.264
1089	81.446
1099	81.941
1109	82.055
1119	82.351
1129	82.594
1139	82.789
1149	83.193
1159	83.48
1169	83.892
1179	84.105
1189	84.126
1199	84.355
1209	83.822
1219	84.146
1229	84.125
1239	84.333
1249	84.613
1259	84.675
1269	84.756
1279	85.024
1289	85.25
1299	85.2
1309	85.375
1319	85.608
1329	85.744
1339	85.764
1349	85.94
1359	86.158
1369	86.123
1379	86.377
1389	86.533
1399	86.619
1409	86.77
1419	86.682
1429	86.694
1439	86.682
1449	86.729
1459	86.75
1469	86.949
1479	87.03
1489	87.073
1499	87.053
1509	87.198
1519	87.135
1529	87.198
1539	87.346
1549	87.393
1559	87.52
1569	87.475
1579	87.576
1589	87.703
1599	87.647
1609	87.608
1619	87.543
1629	87.54
1639	87.293
1649	87.292
1659	86.96
1669	86.158
1679	85.39
1689	84.702
1699	84.211
1709	83.621
1719	83.483
1729	83.652
1739	83.615
1749	83.845
1759	84.125
1769	84.05
1779	84.171
1789	84.142
1799	84.297
1809	84.349
1819	84.456
1829	84.61
1839	84.685
1849	84.63
1859	84.699
1869	84.793
1879	84.793
1889	84.733
1899	84.924
1909	85.212
1919	85.209
1929	85.228
1939	85.329
1949	85.247
1959	85.353
1969	85.518
1979	85.587
1989	85.452
1999	85.386
2009	85.621
2019	85.678
2029	85.856
2039	85.988
2049	85.982
2059	85.972
2069	86.091
2079	86.118
2089	86.337
2099	86.236
2109	86.344
2119	86.454
2129	86.429
2139	86.566
2149	86.735
2159	86.844
2169	86.819
2179	86.722
2189	86.721
2199	86.773
2209	86.76
2219	86.904
2229	86.982
2239	86.952
2249	87.069
2259	87.293
2269	87.295
2279	87.161
2289	87.179
2299	87.351
2309	87.218
2319	87.345
2329	87.331
2339	87.581
2349	87.61
2359	87.566
2369	87.453
2379	87.71
2389	87.752
2399	87.862
2409	87.57
2419	87.657
2429	87.431
2439	87.549
2449	87.547
2459	87.564
2469	87.69
2479	87.791
2489	87.618
2499	87.647
2509	87.869
2519	87.716
2529	87.785
2539	87.831
2549	87.986
2559	88.021
2569	87.975
2579	88.092
2589	88.174
2599	88.284
2609	88.338
2619	88.301
2629	88.339
2639	88.333
2649	88.345
2659	88.537
2669	88.433
2679	88.338
2689	88.318
2699	88.486
2709	88.584
2719	88.481
2729	88.503
2739	88.687
2749	88.636
2759	88.766
2769	88.679
2779	88.663
2789	88.807
2799	88.844
2809	88.843
2819	88.709
2829	88.818
2839	88.943
2849	89.028
2859	89.078
2869	89.02
2879	89.069
2889	89.064
2899	89.062
2909	88.92
2919	89.001
2929	89.225
2939	89.31
2949	89.457
2959	89.569
2969	89.603
2979	89.471
2989	89.464
2999	89.554
3009	89.514
3019	89.537
3029	89.651
3039	89.667
3049	89.764
3059	89.66
3069	89.78
3079	89.821
3089	89.999
3099	89.766
3109	89.702
3119	89.689
3129	89.724
3139	89.825
3149	89.778
3159	89.908
3169	89.931
3179	90.012
3189	89.942
3199	89.944
3209	89.872
3219	90.018
3229	90.055
3239	89.997
3249	90.175
3259	90.005
3269	90.23
3279	90.398
3289	90.175
3299	90.03
3309	90.132
3319	90.209
3329	90.275
3339	90.249
3349	90.219
3359	90.322
3369	90.379
3379	90.32
3389	90.5
3399	90.404
3409	90.357
3419	90.328
3429	90.294
3439	90.181
3449	90.266
3459	90.224
3469	90.246
3479	90.379
3489	90.466
3499	90.495
3509	90.409
3519	90.311
3529	90.349
3539	90.241
3549	90.214
3559	90.236
3569	90.235
3579	90.254
3589	90.439
3599	90.349
3609	90.456
3619	90.615
3629	90.618
3639	90.528
3649	90.429
3659	90.545
3669	90.517
3679	90.543
3689	90.715
3699	90.698
3709	90.689
3719	90.695
3729	90.772
3739	90.809
3749	90.658
3759	90.634
3769	90.733
3779	90.686
3789	90.839
3799	90.64

## Sheet: Fig3bc
t [s]	UMAP Dim 1	UMAP Dim 2	Cluster Label
-5	12.8103	2.07368	4
55	15.1461	11.6992	4
112	16.3349	11.3407	4
169	-4.32522	-1.40326	4
227	13.7679	11.846	4
283	12.7086	11.7985	4
340	11.3467	12.2639	4
397	10.4548	12.8001	4
454	11.9897	12.0331	4
515	10.1478	11.8179	4
572	8.6782	12.6247	4
629	8.20012	11.0886	3
685	8.02624	12.3012	4
742	7.30358	12.4587	4
799	5.97646	13.3784	3
858	5.42166	13.3011	3
915	4.53839	13.2764	3
972	1.98078	9.42282	3
1028	4.25669	12.5533	3
1085	3.55809	12.1242	3
1142	11.3659	12.094	4
1203	0.0740011	8.23459	2
1260	2.35563	5.82178	2
1316	2.57308	1.71737	1
1373	3.81052	4.14757	1
1430	3.36309	6.57152	2
1489	5.9834	10.3338	3
1546	5.03284	11.433	3
1603	8.91119	10.7128	3
1659	4.06583	9.50799	3
1716	4.63181	9.60716	3
1773	3.86924	7.79217	2
1830	9.99073	12.2494	4
1886	5.06513	10.1857	3
1943	2.51966	7.83771	2
2000	2.15004	4.15697	1
2057	0.95683	7.55279	2
2114	1.67655	7.07518	2
2172	2.75976	9.43621	3
2229	2.57295	10.315	3
2286	2.4322	8.32775	2
2343	6.42852	11.611	3
2403	1.18101	9.43816	2
2460	5.10932	3.16352	1
2517	4.36048	1.15876	0
2574	0.753274	5.73257	2
2630	1.55786	6.40039	2
2687	3.28391	6.79356	2
2745	3.75671	10.8052	3
2802	7.8806	12.3783	3
-5	12.8172	2.0546	4
55	15.9467	11.3967	4
112	16.7964	11.4518	4
169	-4.52902	-1.24916	4
227	13.3257	11.8529	4
283	12.7908	12.0219	4
340	10.7951	12.2613	4
397	10.7825	13.1722	4
454	11.4327	12.0244	4
515	8.86617	13.0148	3
572	9.19186	11.3824	4
629	7.61135	11.0791	3
685	8.65729	11.4522	4
742	6.9309	12.9267	3
799	6.29986	13.4413	3
858	4.89363	13.3477	3
915	5.09387	12.9559	3
972	1.67147	9.484	3
1028	4.08045	12.3381	3
1085	3.5976	12.2625	3
1142	8.13515	11.3064	3
1203	0.425757	8.34213	2
1260	3.0856	7.7299	2
1316	2.59148	1.58379	1
1373	2.58984	5.49973	2
1430	0.521676	5.54123	2
1489	2.07362	7.56941	2
1546	4.2242	11.0491	3
1603	6.68823	9.84888	3
1659	5.80399	8.45541	3
1716	5.1824	10.7899	3
1773	5.13998	9.86396	3
1830	8.58765	11.7027	4
1886	2.14036	5.01494	2
1943	2.49732	7.60671	2
2000	3.50006	5.83598	2
2057	0.464787	6.78987	2
2114	2.91634	1.87424	1
2172	1.47157	7.56654	2
2229	4.41079	10.2402	3
2286	0.971376	10.0115	2
2343	7.6444	11.4841	3
2403	2.01785	5.8956	2
2460	5.49417	1.9992	0
2517	3.52097	2.17926	1
2574	0.678901	8.16304	2
2630	2.02168	8.4952	2
2687	3.54112	2.00416	1
2745	2.64969	10.0498	3
2802	8.72324	10.6907	3
-5	13.206	1.80679	4
55	14.4076	11.5573	4
112	16.5607	11.1028	4
169	-4.63446	-1.16007	4
227	13.374	11.9844	4
283	12.6691	11.9491	4
340	11.3156	12.307	4
397	10.8284	13.0978	4
454	12.252	12.1093	4
515	10.2938	13.3069	4
572	7.56113	12.1734	4
629	7.83055	11.1317	3
685	8.99899	11.451	4
742	6.98247	12.9327	3
799	5.82655	13.4851	3
858	4.80473	12.5376	3
915	4.35976	11.2293	3
972	0.618783	5.71925	2
1028	2.30319	10.1846	2
1085	3.83786	12.1066	3
1142	7.63884	11.3509	3
1203	0.88492	7.32341	2
1260	2.26789	5.74943	2
1316	3.09208	3.52535	1
1373	1.2468	6.77437	2
1430	0.708352	5.42393	2
1489	4.24048	10.2777	3
1546	0.90073	8.08072	2
1603	6.69683	9.74244	3
1659	5.77601	8.25993	3
1716	2.34918	10.5682	2
1773	5.08558	10.0359	3
1830	5.76958	10.999	3
1886	4.16904	8.72437	2
1943	1.01591	6.93017	2
2000	3.44599	5.90457	2
2057	1.797	7.56149	2
2114	2.88716	3.33765	1
2172	2.52816	9.37157	3
2229	5.31253	11.3605	3
2286	1.83408	6.19597	2
2343	4.41522	10.4108	3
2403	3.76913	4.90803	1
2460	5.20093	2.97434	1
2517	3.29534	1.9128	1
2574	0.991356	10.1096	3
2630	4.63201	10.3849	3
2687	3.78927	4.83896	2
2745	2.7247	7.20532	2
2802	4.16227	10.1471	3
-5	13.6349	1.59046	4
55	14.5081	11.6075	4
112	16.783	11.2716	4
169	-4.49462	-1.28724	4
227	13.5435	12.0495	4
283	12.5146	11.6997	4
340	10.5974	12.4258	4
397	10.7228	13.0971	4
454	11.693	12.0778	4
515	10.148	13.4327	4
572	8.55439	12.1739	4
629	3.85379	11.0292	3
685	2.32446	7.2161	2
742	6.89867	10.2981	3
799	3.65641	10.9871	3
858	1.20765	8.47306	2
915	2.66408	7.03799	2
972	3.15548	7.41641	2
1028	3.09048	8.98036	2
1085	2.60597	11.3208	2
1142	9.97519	12.3847	4
1203	4.36304	6.24753	2
1260	4.26941	5.64439	2
1316	2.60116	1.57294	1
1373	2.39278	3.61517	1
1430	2.16408	6.60272	2
1489	2.59803	8.41215	2
1546	0.709321	8.08984	2
1603	4.96559	10.8565	3
1659	4.79176	6.29123	2
1716	4.51837	8.66832	2
1773	5.04367	8.54737	3
1830	4.65521	4.21715	1
1886	4.33536	0.857336	0
1943	3.36358	6.09723	2
2000	4.01874	5.63062	2
2057	0.871754	6.6403	2
2114	2.68617	3.10858	1
2172	1.49873	8.42744	2
2229	7.51277	12.0322	4
2286	4.5896	6.00195	2
2343	7.75947	12.063	3
2403	3.40767	2.05689	1
2460	4.51049	3.53745	1
2517	3.58782	1.98796	1
2574	0.818526	5.86915	2
2630	7.24488	11.0927	3
2687	1.79484	6.8602	2
2745	3.15824	7.54149	2
2802	1.92777	8.01642	2
-5	13.6091	1.63457	4
55	15.1888	11.7065	4
112	16.306	11.2379	4
169	-4.51055	-1.26006	4
227	11.8435	12.2573	4
283	11.7688	11.6513	4
340	10.2537	12.371	4
397	8.85183	13.1406	3
454	11.0214	11.9591	4
515	5.63158	13.1514	3
572	9.16465	10.9928	4
629	2.2477	7.10687	2
685	5.53725	1.74996	0
742	1.21163	8.27979	2
799	1.50145	7.64687	2
858	3.38398	4.07014	2
915	3.79663	3.65311	1
972	1.76365	4.15833	1
1028	6.44648	11.286	3
1085	2.27786	5.72779	2
1142	11.0531	11.7493	4
1203	5.36275	6.59634	2
1260	4.55666	3.14249	1
1316	4.85016	2.65983	1
1373	4.60459	3.43885	1
1430	2.5139	7.00361	2
1489	2.9777	5.28247	2
1546	4.29642	5.11381	2
1603	4.89459	9.82613	3
1659	6.0675	9.89546	3
1716	5.49084	5.38324	2
1773	5.00219	8.46386	3
1830	6.57881	10.8048	3
1886	5.88215	8.3996	3
1943	4.70782	2.02631	1
2000	3.43027	3.84489	1
2057	0.559246	5.5372	2
2114	4.93758	5.00063	2
2172	2.18407	5.03635	2
2229	7.06644	9.89861	3
2286	5.56708	1.87196	0
2343	8.88155	13.1247	3
2403	4.42719	3.49425	1
2460	5.07491	1.71612	0
2517	4.83368	2.37998	1
2574	1.32329	6.29912	2
2630	4.94369	10.5526	3
2687	2.86816	7.79709	2
2745	3.30508	5.37857	2
2802	2.05437	4.85019	1
-5	13.6378	1.63208	4
55	15.2149	11.6782	4
112	16.3388	11.2298	4
169	-4.48116	-1.29618	4
227	12.0872	12.2366	4
283	10.4044	12.415	4
340	9.56945	13.1538	4
397	8.40032	13.1275	3
454	8.61612	10.486	3
515	6.00025	11.9936	3
572	8.12914	12.6812	3
629	4.06847	5.37804	2
685	6.10415	10.7623	3
742	4.03119	10.0095	3
799	1.59036	8.81617	2
858	3.44993	10.5941	3
915	3.53056	10.4384	3
972	0.821472	6.2914	2
1028	7.34008	11.3973	3
1085	3.63048	3.7883	1
1142	11.5929	11.5169	4
1203	5.83449	8.15195	3
1260	5.96755	3.29485	1
1316	4.75863	2.30823	1
1373	4.7391	3.01168	1
1430	2.06493	4.82258	2
1489	4.81072	6.07915	2
1546	0.792656	5.20248	2
1603	2.65472	6.13759	2
1659	6.39433	11.7256	3
1716	4.44591	6.14691	2
1773	5.34093	7.36648	2
1830	2.52918	8.84868	2
1886	3.32508	6.80266	2
1943	4.62952	1.5437	0
2000	4.2679	3.87411	1
2057	3.0442	3.39092	1
2114	4.9825	5.10038	2
2172	1.8294	7.33828	2
2229	7.79627	12.6152	3
2286	4.36452	3.58664	1
2343	8.47778	12.6412	3
2403	2.67773	1.72401	1
2460	5.88928	3.317	1
2517	5.78119	3.52223	1
2574	4.87648	6.03153	2
2630	4.28211	11.3629	3
2687	2.44121	10.6849	2
2745	2.73946	1.7088	1
2802	4.77132	9.90779	3
-5	13.4953	1.72585	4
55	14.5268	11.5084	4
112	16.4008	11.0749	4
169	-4.542	-1.24847	4
227	11.7669	12.0619	4
283	8.16983	11.6473	3
340	2.89766	9.9928	2
397	5.1777	11.4299	3
454	9.61807	11.7391	4
515	4.59179	10.8019	3
572	7.94671	11.6497	3
629	4.45412	11.0801	3
685	7.35039	11.0689	3
742	4.81516	11.5714	3
799	6.72796	10.3898	3
858	4.77237	12.6562	3
915	3.33566	12.1315	3
972	2.00102	6.72583	2
1028	3.4412	11.7599	3
1085	1.16531	9.32654	2
1142	11.683	11.4665	4
1203	0.875766	6.05573	2
1260	5.64075	3.15228	1
1316	5.5841	1.2395	0
1373	5.51696	7.06449	2
1430	3.01457	7.6122	2
1489	2.72748	7.05659	2
1546	2.3747	10.3346	3
1603	5.92448	11.2069	3
1659	5.62461	1.30643	0
1716	3.7757	9.763	3
1773	4.96939	2.96514	1
1830	8.5984	10.9086	3
1886	4.50684	8.73987	2
1943	3.29325	6.32416	2
2000	4.32435	0.801659	0
2057	3.93699	4.04933	1
2114	2.87167	7.68402	2
2172	2.53854	1.58363	1
2229	4.84672	11.1776	3
2286	3.7733	7.4529	2
2343	10.5022	12.2392	4
2403	3.78333	7.90006	2
2460	5.31119	6.89059	3
2517	5.1926	1.62433	0
2574	4.79496	2.63485	1
2630	2.30306	10.41	2
2687	1.94615	5.05896	2
2745	2.32831	8.30624	2
2802	7.27207	10.0315	3
-5	13.1759	1.79324	4
55	14.6157	11.5083	4
112	16.6894	11.4699	4
169	-4.38162	-1.39691	4
227	11.0011	12.1098	4
283	10.0743	12.3396	4
340	8.95025	12.9708	4
397	9.0265	11.7411	4
454	12.0548	12.2006	4
515	3.62598	11.8658	3
572	8.34313	12.1517	4
629	3.59467	11.3165	3
685	7.47449	12.7158	3
742	6.02574	12.294	3
799	5.46779	13.2245	3
858	5.72268	13.3989	3
915	4.83772	13.1223	3
972	0.699103	8.84788	2
1028	5.37332	12.8562	3
1085	4.15066	11.5162	3
1142	11.7818	11.5084	4
1203	0.136042	8.23338	2
1260	3.65762	2.93905	1
1316	5.25767	2.84248	1
1373	4.3513	3.3138	1
1430	3.86937	2.50386	1
1489	2.33616	4.3103	1
1546	2.4996	10.4178	3
1603	7.2586	11.8419	3
1659	5.21669	8.93113	3
1716	3.54981	9.18875	3
1773	4.17938	2.76729	1
1830	8.36332	12.5151	3
1886	3.23275	7.00331	2
1943	1.6481	4.35913	1
2000	3.38599	6.22759	2
2057	5.45648	5.62002	2
2114	2.29501	7.32316	2
2172	1.22868	7.15193	2
2229	7.60632	11.3359	3
2286	1.16257	10.0536	3
2343	9.50118	12.0846	4
2403	2.62119	7.06961	2
2460	5.36358	2.66472	1
2517	5.36575	6.89401	2
2574	4.25876	6.5531	2
2630	2.65002	3.31634	1
2687	1.78954	5.18843	2
2745	2.87332	10.1056	2
2802	7.6546	12.0536	4
-5	12.9027	1.98116	4
55	14.6742	11.4281	4
112	16.6328	11.5454	4
169	-4.40509	-1.34185	4
227	13.6909	11.9666	4
283	12.5932	11.5297	4
340	10.4273	12.7968	4
397	8.41404	13.1213	3
454	12.1986	12.0739	4
515	8.90331	11.9308	4
572	8.01176	12.3389	4
629	7.42721	11.4626	3
685	9.85858	11.502	4
742	6.63154	12.7752	3
799	6.39668	13.411	3
858	4.25755	13.1565	1
915	4.62853	13.3551	3
972	0.736513	8.83115	2
1028	5.75547	13.0224	3
1085	3.52082	12.4119	3
1142	9.80177	13.0738	4
1203	1.67478	10.0402	3
1260	2.57961	4.22117	1
1316	5.14497	4.91364	2
1373	3.62468	6.33641	2
1430	4.48349	4.7628	2
1489	2.28064	7.21427	2
1546	5.15521	10.7203	3
1603	9.90789	11.6506	4
1659	5.30773	9.32749	3
1716	2.30629	8.43647	2
1773	3.50658	4.98534	1
1830	8.45655	12.8476	3
1886	5.4645	10.3214	3
1943	1.13807	7.84027	2
2000	3.2335	6.01399	2
2057	1.30633	7.35277	2
2114	0.582113	5.5198	2
2172	2.45167	9.28863	3
2229	4.61958	11.0318	3
2286	1.03717	9.89234	3
2343	9.69259	12.7251	4
2403	1.0096	9.27593	2
2460	5.30715	4.03143	1
2517	4.12143	3.96386	1
2574	3.43939	7.12437	2
2630	4.90177	5.8981	2
2687	1.89432	5.35953	2
2745	3.13992	10.3841	3
2802	8.61657	10.636	4
-5	12.8556	2.01589	4
55	15.0424	11.6586	4
112	16.4235	11.2279	4
169	-4.13975	-1.50428	4
227	13.6921	12.0809	4
283	12.6152	11.5358	4
340	11.3809	12.4659	4
397	10.2052	13.1526	4
454	12.1479	12.0708	4
515	8.74559	13.0811	3
572	7.85181	12.3221	4
629	8.03014	10.8538	3
685	6.42177	12.2572	3
742	6.45839	12.5559	3
799	7.39021	12.6053	4
858	5.84058	13.3429	3
915	4.36339	13.3193	3
972	1.32143	6.14712	2
1028	6.63966	10.4755	3
1085	3.49083	12.5504	3
1142	10.9032	11.8575	4
1203	1.79825	9.97825	3
1260	3.23606	7.88704	2
1316	3.17685	3.41518	1
1373	4.26534	4.86194	2
1430	5.44165	5.33983	2
1489	2.76815	9.96626	3
1546	6.33875	10.56	3
1603	9.50329	11.1049	4
1659	5.71156	9.44561	3
1716	3.16492	6.93678	2
1773	5.75317	10.0594	3
1830	9.25924	12.093	4
1886	2.36072	5.56267	1
1943	2.56083	7.88475	3
2000	4.74998	7.95239	3
2057	0.70858	6.93836	2
2114	0.765214	5.59107	2
2172	2.67096	9.28059	3
2229	4.64204	10.2036	3
2286	2.96636	6.34933	2
2343	6.03246	11.4108	3
2403	1.00968	9.39138	2
2460	5.11995	3.13646	1
2517	5.33973	5.12566	2
2574	2.89417	8.52812	2
2630	1.25002	6.98856	2
2687	1.26386	8.85447	2
2745	2.72163	9.47468	2
2802	7.54993	11.284	3
-5	13.0078	1.89997	4
55	15.5816	11.5454	4
112	16.6788	11.328	4
169	-3.92099	-1.6061	4
227	13.4978	11.8865	4
283	13.5673	11.8434	4
340	10.7293	12.3467	4
397	10.9417	12.9085	4
454	11.8681	11.8244	4
515	10.3282	13.2824	4
572	9.2006	11.6298	4
629	8.49123	11.2564	4
685	8.5969	11.5771	4
742	6.76933	12.9766	3
799	6.02976	13.4964	3
858	4.34865	13.2105	3
915	5.12004	13.0182	3
972	0.955964	8.24236	2
1028	5.12298	10.9426	3
1085	3.73587	12.2299	3
1142	7.21327	11.4029	3
1203	0.305481	7.60947	2
1260	2.39291	4.44487	1
1316	0.640247	5.30021	2
1373	1.9651	3.8376	1
1430	2.80946	1.93131	1
1489	1.60104	7.78457	2
1546	3.83535	11.0053	3
1603	8.28934	11.5274	4
1659	5.67591	8.7468	3
1716	6.47991	11.187	3
1773	3.28601	6.50626	2
1830	8.40341	12.7189	3
1886	2.43016	6.22685	2
1943	1.80937	7.02919	2
2000	3.33972	7.47911	2
2057	0.571554	6.23491	2
2114	1.75372	6.856	2
2172	1.32193	6.11043	1
2229	3.87168	10.2844	3
2286	0.956721	9.8431	2
2343	5.66299	10.9513	3
2403	2.10299	6.26215	2
2460	5.07724	3.00263	1
2517	4.3183	5.52161	2
2574	1.6261	7.51597	2
2630	2.36603	8.92538	2
2687	4.35996	0.790903	0
2745	2.76695	9.67279	3
2802	8.69239	11.3885	3
-5	13.3037	1.74575	4
55	14.5908	11.6614	4
112	16.259	11.1981	4
169	-3.84802	-1.61482	4
227	13.2212	11.8953	4
283	12.6315	11.7048	4
340	11.4786	12.1643	4
397	11.0993	12.6914	4
454	11.1527	11.984	4
515	10.3601	13.119	4
572	8.73368	11.8344	4
629	7.95391	10.9774	3
685	8.56521	10.6645	3
742	6.702	12.9786	3
799	6.14266	13.3598	3
858	4.52505	11.582	3
915	4.17892	11.2807	3
972	5.2473	5.87254	2
1028	4.33231	10.5431	3
1085	4.02258	11.76	3
1142	6.89813	11.5762	3
1203	0.890787	6.39436	2
1260	3.10933	7.86849	2
1316	3.73653	4.62384	1
1373	2.04665	3.81144	1
1430	1.46487	7.99365	2
1489	5.83063	10.2458	3
1546	2.26084	9.9618	3
1603	8.61844	11.5555	4
1659	3.4672	1.82439	0
1716	5.04619	10.9447	3
1773	2.13672	8.54666	2
1830	5.32419	10.3622	3
1886	5.04901	9.87407	3
1943	1.19923	7.24938	2
2000	3.60496	5.78289	2
2057	0.835162	7.17951	2
2114	2.78074	3.25114	1
2172	2.7324	9.37975	3
2229	6.17284	11.3814	3
2286	1.02733	10.0672	3
2343	7.05238	10.1516	3
2403	5.27594	4.55926	2
2460	4.55802	3.46957	1
2517	3.79958	3.5502	1
2574	1.82658	9.97428	3
2630	3.18351	10.2358	2
2687	4.77348	7.51111	2
2745	3.74475	10.7092	3
2802	4.30041	10.2232	3
-5	13.466	1.72496	4
55	14.5344	11.579	4
112	16.6401	11.2785	4
169	-3.6628	-1.72459	4
227	13.3131	12.0265	4
283	12.2305	11.7397	4
340	12.1349	11.4909	4
397	10.8546	12.8918	4
454	11.6897	12.1957	4
515	10.3079	13.4275	4
572	7.50924	12.2958	3
629	4.73178	10.6196	3
685	8.76068	10.373	3
742	6.65341	10.3471	3
799	3.5451	11.8672	3
858	1.07358	8.84547	2
915	2.39748	6.34359	2
972	3.29961	7.05312	2
1028	2.3932	8.14468	2
1085	2.50038	11.1005	2
1142	9.67782	12.8452	4
1203	4.19497	6.51838	2
1260	3.87727	7.65179	2
1316	3.33339	1.88462	1
1373	2.16198	3.67692	1
1430	1.81729	9.39676	2
1489	2.33844	6.89417	2
1546	1.48879	10.042	3
1603	5.03946	11.0281	3
1659	4.57487	4.70248	2
1716	5.62539	10.2732	3
1773	4.63285	3.91062	1
1830	6.99625	11.4709	3
1886	3.70779	3.3203	1
1943	3.6273	2.14025	1
2000	3.94037	5.71352	2
2057	1.12172	7.1342	2
2114	4.82461	4.70131	1
2172	2.08249	5.02146	2
2229	6.72318	11.879	3
2286	3.90295	7.46112	2
2343	8.22031	11.5378	3
2403	4.30903	3.54315	1
2460	5.29911	6.08684	1
2517	3.19652	1.79527	0
2574	0.637004	5.24497	2
2630	7.12645	10.7925	3
2687	2.63869	7.57675	2
2745	1.9521	9.52497	3
2802	2.35169	7.78639	2
-5	13.529	1.67338	4
55	15.2586	11.7023	4
112	16.0914	11.2984	4
169	-3.66893	-1.67326	4
227	12.935	11.9856	4
283	11.8674	11.4836	4
340	8.80541	10.4555	4
397	10.4916	12.9762	4
454	9.5485	13.0242	4
515	7.65205	12.1564	4
572	7.46666	11.5987	3
629	2.30941	6.93524	2
685	4.80403	8.96167	3
742	1.23367	9.9711	3
799	3.20616	8.69463	2
858	3.53581	2.84726	1
915	3.49817	2.91314	1
972	1.80445	4.03355	1
1028	5.2387	11.2779	3
1085	3.4651	7.41646	2
1142	10.8837	11.8268	4
1203	5.4857	3.15296	1
1260	5.07243	3.25337	1
1316	4.50869	2.25709	1
1373	4.30341	5.94945	2
1430	1.93382	9.49205	3
1489	3.52395	7.39484	2
1546	3.69231	4.0069	1
1603	3.11842	6.43385	2
1659	3.04231	1.92714	1
1716	4.61156	3.79072	1
1773	5.14044	8.0214	2
1830	6.13129	9.7124	3
1886	5.2394	7.55945	3
1943	5.08186	2.64173	1
2000	3.02371	1.7142	1
2057	0.569403	5.34272	2
2114	3.33588	5.95398	1
2172	2.33343	9.69242	3
2229	6.62473	9.7704	3
2286	4.33127	3.63423	1
2343	8.5551	13.0471	3
2403	4.97675	6.66569	2
2460	5.60239	1.22088	0
2517	5.49147	1.79789	0
2574	2.42864	5.87339	2
2630	4.02704	11.8859	3
2687	1.80799	9.85211	3
2745	3.14418	8.02613	2
2802	4.40501	0.733643	0
-5	12.9753	1.92303	4
55	15.3689	11.6836	4
112	16.2066	11.2018	4
169	-3.76907	-1.62304	4
227	12.5953	12.2191	4
283	10.683	12.2331	4
340	10.0972	13.1163	4
397	8.57496	13.0802	3
454	5.61208	1.20593	0
515	8.35809	10.6558	3
572	6.19445	10.0257	3
629	2.68489	7.513	2
685	5.77358	10.8027	3
742	3.272	10.0818	3
799	1.26383	8.5755	2
858	2.18575	10.2497	2
915	2.76578	10.7701	2
972	2.43248	7.87337	2
1028	5.33338	10.7714	3
1085	4.12757	6.45042	2
1142	11.5206	11.6267	4
1203	4.00052	6.74586	2
1260	5.47471	6.98514	3
1316	5.50879	2.98983	1
1373	4.65404	1.85595	1
1430	0.939754	9.66792	3
1489	3.52018	5.1125	2
1546	2.23498	7.53552	2
1603	4.54033	9.54886	2
1659	5.54111	11.2642	3
1716	5.19099	5.97877	2
1773	5.18715	4.95863	2
1830	1.34071	6.19108	1
1886	4.66157	5.13704	2
1943	4.82611	5.60752	2
2000	4.31249	5.08006	2
2057	2.97664	7.68607	2
2114	2.65516	3.17418	1
2172	1.87042	7.27068	2
2229	6.12753	11.47	3
2286	4.69912	3.63959	1
2343	8.33084	12.7241	3
2403	4.97555	6.25459	2
2460	5.21813	1.52269	0
2517	5.94403	3.30011	1
2574	4.85246	6.54565	2
2630	2.3975	8.6265	2
2687	2.17428	10.0428	3
2745	1.07022	6.96119	2
2802	6.00819	10.9799	3
-5	12.8993	1.98361	4
55	15.4153	11.5966	4
112	16.4468	11.086	4
169	-4.07599	-1.5137	4
227	11.0919	11.9078	4
283	8.45518	11.7058	4
340	3.81443	11.097	3
397	6.18378	10.308	3
454	4.28916	0.685085	0
515	4.76291	10.6185	3
572	7.98055	12.3485	4
629	4.4728	10.7758	3
685	7.13002	10.7375	3
742	4.42619	12.3295	3
799	6.93103	10.5909	3
858	5.05814	12.8857	3
915	3.54326	12.3114	3
972	0.137969	7.95159	2
1028	3.42193	11.9028	3
1085	2.50473	11.1615	2
1142	11.5996	11.4095	4
1203	0.698678	7.6889	2
1260	5.76365	3.36064	1
1316	5.31727	1.57226	0
1373	5.4669	7.0142	2
1430	1.94289	6.42201	2
1489	2.03787	8.2329	2
1546	1.45257	8.32505	2
1603	8.57494	10.7319	3
1659	-3.7457	-1.67572	4
1716	5.96974	10.1367	3
1773	4.68057	5.07418	2
1830	8.06731	12.3054	4
1886	5.14727	10.2302	3
1943	3.31869	6.32684	2
2000	3.33295	6.17282	2
2057	3.56549	6.9663	2
2114	2.49891	1.52108	1
2172	1.74544	7.13922	2
2229	8.23023	11.2623	4
2286	3.91168	7.65607	2
2343	11.1869	12.0404	4
2403	3.27643	7.54765	2
2460	5.41985	6.90788	2
2517	5.03716	1.64144	0
2574	5.55661	3.89756	1
2630	2.04438	4.7773	1
2687	2.83922	7.11655	2
2745	0.697282	8.12896	2
2802	8.66665	10.3319	3
-5	12.7886	2.09785	4
55	15.4711	11.6005	4
112	16.6154	11.4	4
169	-4.44674	-1.36686	4
227	12.588	11.6325	4
283	12.4884	11.5504	4
340	8.60458	12.8232	3
397	8.83247	11.4278	4
454	12.4979	12.2674	4
515	3.51785	11.4974	3
572	7.52361	10.9174	4
629	3.66576	11.2747	3
685	8.63819	11.945	4
742	7.11737	12.7929	3
799	6.0846	13.2532	3
858	5.22347	13.2966	3
915	3.94222	12.9686	1
972	1.92545	9.66314	3
1028	4.60042	12.6268	3
1085	3.18458	12.2623	2
1142	11.9249	11.8857	4
1203	0.489476	8.53198	2
1260	3.46318	1.98717	1
1316	4.53418	3.29643	1
1373	4.61713	4.948	2
1430	4.00883	5.11436	2
1489	3.14243	8.61782	2
1546	2.84301	10.3732	3
1603	8.19191	12.191	4
1659	6.43178	11.5415	3
1716	3.22662	9.65011	3
1773	4.36076	3.66842	1
1830	10.4573	12.3208	4
1886	2.55055	5.9428	2
1943	1.77916	4.2482	1
2000	4.13135	5.42248	2
2057	5.41736	5.28477	2
2114	0.599601	5.48091	2
2172	1.13952	6.81269	1
2229	7.54561	11.2781	3
2286	1.80303	5.87541	2
2343	9.70922	12.2389	4
2403	1.24352	9.28313	2
2460	5.47214	2.134	0
2517	5.39531	2.99159	1
2574	4.9042	5.79584	2
2630	1.59717	6.59166	2
2687	2.89673	6.89936	2
2745	2.99824	9.82938	2
2802	7.48529	10.5344	3
-5	12.8016	2.07271	4
55	14.6957	11.4694	4
112	16.502	11.581	4
169	-4.35067	-1.43827	4
227	13.7908	11.9583	4
283	12.6768	11.675	4
340	10.0167	13.0514	4
397	10.5074	13.2793	4
454	11.2782	11.9646	4
515	8.6901	12.2241	4
572	8.07716	12.2747	4
629	8.24519	11.3078	3
685	9.10773	11.7848	4
742	6.76728	12.949	4
799	8.52943	12.031	4
858	5.8534	13.5309	3
915	5.16544	13.1133	3
972	1.05804	9.12838	3
1028	4.47581	12.8948	3
1085	3.43795	12.5414	1
1142	9.55084	13.0053	4
1203	0.109807	8.27459	2
1260	3.36694	7.78162	2
1316	4.97011	5.5666	2
1373	4.33774	2.5695	1
1430	5.17147	5.14267	2
1489	1.59802	8.23873	2
1546	3.73056	11.0879	3
1603	10.1049	11.4961	4
1659	6.20526	9.60656	3
1716	4.84302	11.5578	3
1773	4.44015	6.11473	2
1830	8.53759	12.8657	3
1886	5.74435	10.3091	3
1943	1.82051	4.55006	1
2000	3.30735	5.73915	2
2057	3.08995	6.49045	2
2114	0.675126	5.69686	2
2172	2.18407	9.28051	3
2229	4.64623	10.5955	3
2286	1.18992	9.63027	3
2343	10.0639	13.095	4
2403	1.07642	9.37308	2
2460	5.16657	3.67449	1
2517	4.61264	5.3242	2
2574	3.29935	6.52644	2
2630	4.83313	5.61219	2
2687	1.86276	5.83072	2
2745	5.48462	10.9468	3
2802	8.54508	10.706	4

## Sheet: Fig4b
Latent Dim 1	Latent Dim 2	Latent Dim 3	Latent Dim 4	Latent Dim 5	Latent Dim 6	Latent Dim 7	Latent Dim 8	Latent Dim 9	Latent Dim 10	Latent Dim 11	Latent Dim 12	Latent Dim 13	Latent Dim 14	Latent Dim 15	Latent Dim 16	Latent Dim 17	Latent Dim 18	Latent Dim 19	Latent Dim 20	Latent Dim 21	Latent Dim 22	Latent Dim 23	Latent Dim 24	Latent Dim 25	Latent Dim 26	Latent Dim 27	Latent Dim 28	Latent Dim 29	Latent Dim 30	Latent Dim 31	Latent Dim 32	Latent Dim 33	Latent Dim 34	Latent Dim 35	Latent Dim 36	Latent Dim 37	Latent Dim 38	Latent Dim 39	Latent Dim 40	Latent Dim 41	Latent Dim 42	Latent Dim 43	Latent Dim 44	Latent Dim 45	Latent Dim 46	Latent Dim 47	Latent Dim 48	Latent Dim 49	Latent Dim 50
0.311648	0	0	0.276572	0.1881	0.108763	0	0	0.238161	0.132475	0.17661	0	0	0	0.540803	0.682075	0.132033	0.320572	0.0329065	0.131894	0.163783	0	0.288034	0.20218	0	0	0.261724	0	0	0.774795	0	0	0.247492	0.288892	0.147532	0	0	0.116647	0.132388	0.414826	0.197492	0.389201	0.227812	0.0917288	0.262868	0.184738	0	0.13533	0.275935	0.296631
0.201683	0	0	0.158899	0.217037	0.140068	0	0.116505	0.213783	0.31234	0.132248	0	0	0	0.318547	0	0.00994816	0.113412	0.125753	0.0127457	0.0122855	0	0.160785	0.126156	0	0	0.26704	0	0	0.344197	0	0	0.132088	0.144486	0.123209	0	0	0.0882033	0.189682	0.197212	0.134965	0.299735	0.225429	0.210587	0.278781	0.172337	0	0.280849	0.275965	0.138171
0.132434	0	0	0.0929141	0.125856	0.0325409	0	0.122794	0.161816	0.104607	0.165817	0	0	0	0.299824	0	0.0767366	0.193703	0.112767	0.104012	0.0433515	0	0.182476	0.085256	0	0	0.171419	0	0	0.269679	0	0	0.165371	0.260027	0.219564	0	0	0.130767	0.154645	0.190854	0.0944609	0.24941	0.17755	0.136134	0.189992	0.0990382	0	0.171835	0.163282	0.163211
0.18486	0	0	0.11771	0.0866859	0.118651	0	0.4039	0.152545	0.0711579	0.242569	0	0	0	0.301265	0	0.134662	0.177032	0.040566	0.117135	0.228767	0	0.165256	0.150617	0	0	0.191208	0	0	0.234291	0	0	0.172753	0.136877	0.0361881	0	0	0.191645	0.159162	0.11459	0.0503897	0.242289	0.10045	0.200668	0.115682	0.0902714	0	0.141029	0.11128	0.130475
0.288178	0	0	0.166793	0.149406	0.176066	0	0	0.244281	0.144381	0.184505	0	0	0	0.376535	0.192418	0.150237	0.207298	0.110721	0.198202	0.139018	0	0.263969	0.237608	0	0	0.229342	0	0	0.429202	0	0	0.0901257	0.27132	0.223182	0	0	0.168897	0.183877	0.284923	0.0666197	0.237842	0.338894	0.290851	0.32006	0.266069	0	0.217786	0.218481	0.221332
0.19756	0	0	0.197493	0.189977	0.181068	0	0.0913814	0.149829	0.303712	0.321904	0	0	0	0.369186	0	0.367987	0.335831	0.312159	0.349251	0.309419	0	0.360905	0.312285	0	0	0.262013	0	0	0.425652	0	0	0.231378	0.2662	0.261746	0	0	0.256121	0.24967	0.0828353	0.135108	0.320701	0.284794	0.311111	0.1733	0.171544	0	0.325281	0.387217	0.135258
0.468717	0	0	0.0921284	0.201985	0.296993	0	0	0.300998	0.323351	0.205977	0	0	0	0.55931	0.252795	0.168452	0.499556	0.385679	0.344764	0.214134	0	0.353896	0.398884	0	0	0.475956	0	0	0.555032	0	0	0.333175	0.653855	0.378532	0	0	0.560996	0.435727	0.283445	0.300092	0.418549	0.461088	0.484488	0.523158	0.47849	0	0.509675	0.354075	0.239224
0.670376	0	0	0.521852	0.208514	0.652509	0	0	0.435393	0.818209	0.52748	0	0	0	0.826797	0.662169	0.467326	0.36663	0.383142	0.40085	0.580222	0	0.62393	0.68405	0	0	0.317445	0	0	0.577964	0	0	0.621728	0.474083	0.433061	0	0	0.679792	0.42629	0.440448	0.0441097	0.425695	0.529378	0.401368	0.79772	0.641676	0	0.555829	0.556347	0.637914
0.303975	0	0	0.180979	0.215212	0.286745	0	0	0.150306	0.227079	0.226208	0	0	0	0.366458	0.151699	0.279539	0.279478	0.288253	0.353988	0.365463	0	0.46938	0.386481	0	0	0.255186	0	0	0.386017	0	0	0.210873	0.454093	0.28488	0	0	0.483736	0.272915	0.258429	0.243851	0.162528	0.341712	0.443973	0.533574	0.418287	0	0.302453	0.479107	0.415116
0.193331	0	0	0.302297	0	0.358038	0	0	0.353444	0.47753	0.314498	0	0	0	0.462921	0.111722	0.111228	0.418601	0.503464	0.320148	0.381708	0	0.473247	0.329613	0	0	0.380947	0	0	0.258144	0	0	0.224332	0.744177	0.304295	0	0	0.301515	0.431855	0.307323	0.294689	0.347495	0.442792	0.558372	0.824768	0.370883	0	0.54209	0.237771	0.311288
0.600833	0	0	0.481383	0.219325	0.360678	0	0	0.694211	0.751623	0.32055	0	0	0	0.599952	0.511731	0.366352	0.405034	0.413022	0.312369	0.764247	0	0.646902	0.695481	0	0	0.50303	0	0	0.392988	0	0	0.591315	0.485432	0.425334	0	0	0.31721	0.744974	0.738625	0.288452	0.520688	0.677514	0.591098	0.775037	0.490453	0	0.352201	0.431059	0.459842
0.38505	0	0	0.307731	0.448127	0.426627	0	0	0.795862	0.519262	0.302259	0	0	0	0.4795	0.0483473	0.488984	0.420288	0.411408	0.778757	0.833832	0	0.465861	0.30801	0	0	0.560842	0	0	0.508291	0	0	0.546429	0.815642	0.800671	0	0	0.555812	0.660073	0.607678	0.238335	0.370364	0.809898	0.912277	0.717399	0.772632	0	0.500545	0.593719	0.250066
0.482253	0	0	0.335539	0.315897	0.249449	0	0	0.495045	0.376308	0.172462	0	0	0	0.389959	0.193437	0.607643	0.256628	0.508883	0.399222	0.709356	0	0.24409	0.257475	0	0	0.716431	0	0	0.331169	0	0	0.201346	0.51882	0.489095	0	0	0.470475	0.52719	0.58715	0.362613	0.197039	0.518221	0.70151	0.504376	0.83062	0	0.524767	0.443129	0.411961
0.469432	0	0	0.141467	0.32703	0.739368	0	0	0.312124	0.253163	0.392228	0	0	0	0.421781	0.284865	0.306408	0.563115	0.639727	0.330223	0.682991	0	0.837037	0.384983	0	0	0.592778	0	0	0.638854	0	0	0.122828	0.724989	0.774319	0	0	0.643159	0.612095	0.619028	0.0919211	0.523413	0.728866	0.469043	0.50835	0.981541	0	0.5849	0.411148	0.296585
0.47567	0	0	0.623181	0.372416	0.535032	0	0	0.158537	0.421548	0.391433	0	0	0	0.540405	1.06807	0.628492	0.525018	0.907536	0.441978	1.11928	0	0.862978	0.799956	0	0	0.849925	0	0	1.24956	0	0	0.0841803	1.03684	0.912838	0	0	0.253472	0.697962	1.17315	0.516944	0.639603	0.688352	0.621919	0.707534	0.841759	0	0.795526	0.680578	0.402816
0.608534	0	0	0.673753	0.574886	0.100181	0	0	0.708387	0.414508	0.159282	0	0	0	0.56951	0.814255	0.626916	0.672668	0.685283	0.741071	1.35915	0	0.574722	0.705695	0	0	0.721729	0	0	1.39144	0	0	0.505952	0.651534	0.617894	0	0	0.348496	0.564506	0.86065	0.219871	0.548443	0.446969	0.890712	0.425809	0.663187	0	0.821752	0.757402	0.500934
0.653599	0	0	0.658515	1.05112	0.498689	0	0	0.890354	0.55367	0	0	0	0	1.25352	0.484044	0.540623	0.843471	1.19505	0.84482	0.749383	0	0.58636	0.639407	0	0	0.966717	0	0	1.20774	0	0	0.262025	1.97216	1.15531	0	0	0.155434	0.281597	1.02873	0.297161	0.590733	0.64801	1.06916	0.292561	0.913136	0	1.08389	1.01979	0.736448
0.327338	0	0	0.373484	0.557738	0.507017	0	0	0.934298	1.33801	0.294373	0	0	0	0.719815	0.647515	0.809775	0.661627	0.35071	1.51334	0.685442	0	0.414379	0.509986	0	0	0.557505	0	0	0.542061	0	0	0.874569	0.823714	0.507977	0	0	1.35647	0.718914	1.21002	0.345577	0.761904	0.96723	1.29672	0.985123	1.36318	0	0.814953	1.62935	0.461659
0.348878	0	0	0.980638	0.559461	0.544782	0	0	1.36571	1.18531	0.549062	0	0	0	1.04051	0.665553	0.340755	0.882119	1.09587	0.105527	0.293947	0	0.567692	0.0546934	0	0	0.898436	0	0	0.785066	0	0	0.757927	1.09655	1.44597	0	0	0.416389	0.854335	0.969575	0.424634	0.817879	0.928979	1.4176	0.612996	1.42263	0	1.17327	1.39039	0.607584
0.459248	0	0	0.981887	0.342772	0.787912	0	0	0.437987	0.522233	0.431915	0	0	0	1.27307	0.360733	0.64414	0.810101	0.422188	0.301683	0.332112	0	0.982721	0.139219	0	0	0.940877	0	0	0.923374	0	0	0.221551	1.14285	0.970909	0	0	0.239411	0.798982	0.493303	0.41277	0.991285	0.262877	1.30628	0.19663	1.15336	0	1.04135	1.00231	0.653022
0.243663	0	0	0.221025	0.186101	0.330421	0	0.00291989	0.369235	0.229044	0.281726	0	0	0	0.559929	0.00888728	0.253545	0.357171	0.221175	0.396289	0.426844	0	0.342913	0.192585	0	0	0.424966	0	0	0.148623	0	0	0.451825	0.398166	0.476009	0	0	0.37771	0.483105	0.199982	0.382749	0.33685	0.368898	0.598863	0.415999	0.578911	0	0.545791	0.395417	0.328042
0.75401	0	0	1.35097	1.44335	0.738233	0	0	0.996677	2.52464	0.55601	0	0	0	2.51871	1.2299	1.46988	0.715706	0.366331	0.499735	1.45523	0	0.352334	1.6567	0	0	1.3145	0	0	0.404399	0	0	1.37652	1.28716	1.14169	0	0	2.73406	1.32714	2.05251	0.446152	1.5504	1.08206	1.50804	1.22721	2.0581	0	0.16191	1.38166	0.748759
1.23315	0	0	0.806284	0.918525	0.530437	0	0	1.98851	1.04214	0.214504	0	0	0	1.09728	1.50559	1.42833	0.647275	1.51352	1.24134	0.870691	0	0.37145	0.963428	0	0	0.593818	0	0	1.29215	0	0	1.37505	1.36405	0.649324	0	0	2.83567	0.742106	2.10869	0.602549	0.923726	2.30276	1.89808	0.73182	1.97591	0	1.37497	2.33219	0.526992
1.10721	0	0	1.01911	0.736669	0.874056	0	0	2.98522	1.42407	0.264529	0	0	0	1.3696	3.08201	1.16354	0.931843	2.28432	0.85178	1.34078	0	0.623061	0.84268	0	0	1.3814	0	0	1.31014	0	0	2.0079	1.7743	2.19249	0	0	2.29528	1.47236	4.15862	0.320856	1.25888	0.519576	0.717171	0.871587	3.29749	0	2.22884	2.72176	0.618908
1.19787	0	0	1.06102	0.729864	0.878452	0	0	2.19375	1.90328	0.268761	0	0	0	1.01789	2.79757	0.801747	0.371461	1.84329	0.862635	0.978747	0	0.567957	0.898858	0	0	1.22907	0	0	1.34465	0	0	1.2134	0.994829	1.16018	0	0	2.03354	0.876072	3.29199	0.553153	0.967785	0.633943	1.20445	0.819039	2.36295	0	1.55735	2.10181	0.41032
0.86127	0	0	0.362905	0.444433	0.40895	0	0	1.25324	0.766171	0.025914	0	0	0	0.797505	1.50305	0.660944	0.19052	1.52454	1.60633	0.453183	0	0.860791	0.470458	0	0	0.535655	0	0	1.39304	0	0	1.15106	1.38198	0.516225	0	0	1.62636	0.317601	2.06918	0.225032	0.545499	0.792408	1.31648	0.468015	2.21703	0	1.62865	1.2512	0.349392
0.377999	0	0	0.14995	0.598229	0.678271	0	0	0.528537	0.814602	0.21544	0	0	0	0.766627	0.423406	0.805021	0.538032	1.02612	0.262105	0.384914	0	0.648181	0.613753	0	0	0.761383	0	0	0.429464	0	0	0.524136	0.733837	1.16545	0	0	0.878892	0.703092	0.867532	0.184346	0.473214	0.905421	1.22145	0.548003	1.29119	0	0.405355	1.1735	0.858699
0.684016	0	0	0.303179	0.594045	0.38534	0	0	1.10852	0.912655	0.244556	0	0	0	1.0259	0.413681	1.02344	0.458435	0.864062	0.520907	0.395954	0	0.504451	0.524971	0	0	0.855173	0	0	0.42504	0	0	0.743188	0.829415	1.1695	0	0	0.820831	0.816382	0.73096	0.284687	0.699762	0.775841	1.54269	0.673968	0.986409	0	0.657087	1.06907	0.560907
0.135806	0	0	0.389158	0.388544	0.513878	0	0	0.347836	0.491788	0.200838	0	0	0	0.619963	0.672536	0.239143	0.438837	0.745576	1.08452	0.402841	0	0.532589	0.319893	0	0	0.476163	0	0	0.519397	0	0	0.53159	0.789937	0.648642	0	0	0.501912	0.464289	0.523751	0.26016	0.473783	0.655783	0.959279	0.749696	0.602584	0	0.792331	0.819953	0.281714
0.482087	0	0	0.683503	0.18971	0.427691	0	0	0.764796	1.33946	0.222419	0	0	0	0.96333	1.18194	1.15964	0.772911	1.11431	1.07514	0.662191	0	0.525774	0.847015	0	0	1.04339	0	0	0.937649	0	0	0.959945	1.05511	1.42656	0	0	0.961449	1.00459	1.60193	0.33671	0.440532	1.01332	1.54286	0.426525	1.2928	0	0.983951	1.75812	0.542655
0.567895	0	0	0.712657	0.972752	0.520858	0	0	0.543601	0.457104	0.205752	0	0	0	1.13252	1.09997	0.598791	0.409572	1.04463	1.31828	0.543587	0	0.87062	0.598041	0	0	0.538059	0	0	1.12968	0	0	0.980791	1.24794	0.998658	0	0	0.693861	0.670405	0.803158	0.208519	0.745151	0.919272	1.66199	0.648729	1.60669	0	1.07463	1.03567	0.570646
0.787748	0	0	0.281175	0.494259	0.54397	0	0	1.34676	1.00114	0	0	0	0	0.747233	1.2048	0.707633	0.169541	1.11233	1.0171	0.581273	0	0.468763	0.674446	0	0	0.563208	0	0	1.06912	0	0	1.03072	1.10147	0.877459	0	0	0.845413	0.639152	1.56525	0.332696	0.42378	0.976841	1.64817	0.583335	1.48942	0	1.15392	1.30671	0.362559
0.314579	0	0	0.365087	0.129016	0.24215	0	0	0.536601	0.61316	0.44852	0	0	0	0.380881	0.558166	0.319368	0.384589	0.442024	0.0879769	0.56075	0	0.402569	0.481382	0	0	0.596943	0	0	0.467838	0	0	0.298874	0.504212	0.643454	0	0	0.31725	0.644829	0.853612	0.324477	0.446647	0.571858	0.338972	0.58184	0.563062	0	0.464485	0.642835	0.229621
0.599218	0	0	0.41315	0.595167	0.582506	0	0	1.17112	0.7783	0.213123	0	0	0	0.968846	0.781112	0.677948	0.381527	0.683201	0.543028	0.582987	0	0.890109	0.676183	0	0	0.480444	0	0	0.755853	0	0	0.895061	1.2916	0.847526	0	0	0.910254	0.808796	1.03143	0.311938	0.76232	1.31238	1.71242	0.571702	1.06448	0	1.10135	1.25091	0.513888
0.97973	0	0	0.33771	0.585757	0.239777	0	0	1.01731	0.927243	0.244349	0	0	0	1.41648	0.703418	0.460621	0.386443	0.888588	1.4351	0.472727	0	0.786139	0.688071	0	0	0.791395	0	0	0.766269	0	0	1.86938	1.10207	0.740184	0	0	1.59871	0.714115	1.08573	0.0954618	0.640323	1.21878	1.30544	0.378167	1.99442	0	0.874932	0.74833	0.691644
1.44516	0	0	0.932292	0.818732	0.367844	0	0	1.4261	1.56716	0.109765	0	0	0	0.363018	2.50706	0.566022	0.251632	2.52044	1.9897	0.143857	0	1.31364	1.0086	0	0	0.40909	0	0	2.66448	0	0	1.19595	2.21094	0.364621	0	0	2.66499	0.64959	2.67978	0.486457	0.877435	2.09886	2.03247	1.15999	2.74773	0	2.17534	2.55439	0.703765
0.498011	0	0	1.02585	0.364448	0.387564	0	0	1.13196	2.25697	0.198075	0	0	0	1.02143	0.958786	0.927814	0.456151	1.16704	0.885197	0.586859	0	0.400809	0.639005	0	0	0.671953	0	0	0.722398	0	0	0.812939	0.987793	0.478306	0	0	1.78639	0.691975	1.99484	0.508238	0.519984	1.16795	1.03617	0.737282	1.75842	0	1.27842	1.85634	0.247661
1.25731	0	0	0.449841	0.613879	0.50504	0	0	1.48758	1.29729	0.0318566	0	0	0	1.29734	1.30571	0.828549	0.437296	1.1392	1.33422	0.769415	0	0.770811	0.753479	0	0	0.745357	0	0	0.769102	0	0	1.73959	1.2517	1.03247	0	0	1.90292	0.929724	2.15307	0.329911	0.79072	0.909965	1.42751	0.648061	2.22456	0	1.33407	0.85071	0.438908
0.856757	0	0	0.234359	0.819014	0.498825	0	0	1.0003	1.1861	0.259939	0	0	0	0.52514	0.382425	0.223746	0.803632	0.453407	0.843191	0.547227	0	0.682361	0.549597	0	0	0.795398	0	0	0.301897	0	0	1.03625	0.793916	0.952647	0	0	1.02282	0.824685	0.703033	0.165512	0.807707	1.49817	1.09913	1.09312	1.6784	0	0.451554	1.61031	0.321274
0.735416	0	0	0.618631	0.785408	0.380531	0	0	1.56125	1.05538	0.391168	0	0	0	1.55165	0.86649	0.965158	0.369246	0.609505	0.391585	1.08505	0	0.783256	1.13271	0	0	1.18026	0	0	0.725612	0	0	1.25849	0.471425	0.73487	0	0	1.19839	1.2218	1.37121	0.203882	0.449887	0.870231	1.99764	0.571719	1.58679	0	0.852673	1.21748	0.675163
0.905649	0	0	0.137973	0.714199	0.747091	0	0	1.21742	1.20185	0.132669	0	0	0	1.12357	0.458896	0.821639	0.487843	1.36362	1.34794	0.533201	0	0.697251	1.16285	0	0	0.888354	0	0	0.564462	0	0	1.99055	1.41961	0.865938	0	0	1.62467	0.676707	1.1949	0.120175	0.516074	0.912391	2.10982	0.741403	1.46456	0	1.22636	0.949719	0.643198
0.367998	0	0	0.741109	0.264348	0.414738	0	0	0.668304	0.595053	0.416933	0	0	0	0.622126	0.666585	0.754944	0.437777	0.655213	0.798954	0.780543	0	0.668894	0.723097	0	0	0.509382	0	0	0.580055	0	0	0.715897	0.503138	1.08813	0	0	0.526099	0.967921	0.644246	0.382517	0.632247	0.683698	0.911768	0.422384	0.78392	0	0.733766	0.953076	0.671223
1.20598	0	0	0.420787	0.79442	0.357094	0	0	1.31031	1.53552	0.201797	0	0	0	0.750678	0.877693	1.0036	0.476372	1.05686	0.356958	0.605202	0	0.589566	0.890275	0	0	0.590131	0	0	0.305297	0	0	1.27409	0.911112	0.83857	0	0	1.70664	0.809996	1.64083	0.417252	0.775541	1.42763	1.46162	0.907077	1.43276	0	0.549577	1.73754	0.11743
0.868555	0	0	1.24099	0.720209	0.795281	0	0	2.02407	0.676726	0.672663	0	0	0	0.319848	3.36198	0.689203	0.580201	1.66422	1.18723	1.26064	0	0.93997	0.966744	0	0	1.5991	0	0	2.03878	0	0	0.848752	0.904483	1.26995	0	0	1.38166	1.02314	2.80186	0.617738	0.78124	0.647435	0.970729	0.427829	1.51152	0	1.19778	3.55288	0.601031
1.30595	0	0	1.34464	1.28166	1.03856	0	0	1.71103	0.697044	0.552463	0	0	0	1.0844	4.75895	0.596476	0.289572	1.91229	1.0224	0.819374	0	2.18758	1.22788	0	0	0.637165	0	0	4.10882	0	0	0.261096	3.02866	1.00438	0	0	1.85254	0.501872	3.836	0.640489	2.14632	1.43374	1.86881	1.63671	2.54177	0	2.5857	2.83375	1.14372
1.28944	0	0	1.02735	0.783169	0.525411	0	0	1.38906	2.70538	0.351327	0	0	0	1.08142	2.10663	1.38064	0.585407	1.52416	1.14646	0.999936	0	0.684777	1.02183	0	0	1.15384	0	0	0.922524	0	0	1.35509	1.03971	1.45008	0	0	2.65677	0.870283	3.32619	0.46182	0.720309	0.968481	1.37004	1.3763	2.56142	0	1.31964	2.63727	0.333472
0.709334	0	0	0.901046	1.11019	0.4082	0	0	1.36131	1.53779	0.315256	0	0	0	0.438	2.2326	0.779856	0.745537	1.05852	1.46954	0.881006	0	0.495403	0.811868	0	0	0.895436	0	0	1.4752	0	0	1.29574	0.862721	1.08319	0	0	2.16282	1.09563	2.21616	0.446565	0.921433	1.81517	1.29443	1.02905	2.27276	0	1.01961	3.07954	0.669069
1.11352	0	0	0.524598	0.503041	0.431461	0	0	1.20162	1.37799	0.134024	0	0	0	0.249344	1.55053	0.321591	0.434009	1.80488	2.04818	0.581437	0	0.763852	0.588536	0	0	0.60914	0	0	1.56055	0	0	1.47091	0.944756	0.574404	0	0	1.64319	0.663839	1.5928	0.381174	0.601136	1.44015	1.50878	0.614935	1.54063	0	1.63259	2.06191	0.522894
0.661898	0	0	0.475295	0.585374	0.507981	0	0	0.554287	1.07484	0.374439	0	0	0	1.021	0.292333	0.410291	0.556184	0.730637	1.40479	0.569202	0	0.737942	0.291396	0	0	0.786943	0	0	0.537988	0	0	1.11839	1.20711	1.00022	0	0	0.872915	0.580418	0.592224	0.394961	0.824214	1.10272	1.62705	0.836559	1.61064	0	0.952653	1.09785	0.605109
0.205386	0	0	0.310113	0.285428	0.529352	0	0	0.614363	1.0141	0.278969	0	0	0	0.830685	0.31723	0.569028	0.338856	0.89008	0.0158285	0.589059	0	0.345715	0.47597	0	0	0.678144	0	0	0.336814	0	0	0.48158	0.513267	0.629587	0	0	0.882267	0.620535	1.05499	0.267193	0.317407	0.517481	0.732602	0.850476	0.853958	0	0.479461	0.689602	0.296282
0.314297	0	0	0.221782	0.221224	0.107582	0	0	0.206916	0.143687	0.207733	0	0	0	0.600711	0.884213	0.134657	0.373467	0.0680718	0.0804163	0.16936	0	0.292792	0.199172	0	0	0.24719	0	0	0.902272	0	0	0.220025	0.333324	0.185738	0	0	0.0960219	0.142891	0.507267	0.169935	0.359512	0.228141	0.0848538	0.29576	0.200165	0	0.120927	0.342745	0.284608
0.122541	0	0	0.144906	0.147894	0	0	0.226566	0.125879	0.1433	0.192217	0	0	0	0.244994	0	0.144349	0.158517	0.110227	0.0370148	0.0383548	0	0.163144	0.126932	0	0	0.125851	0	0	0.26242	0	0	0.133792	0.167296	0.149965	0	0	0.121713	0.147544	0.144361	0.101275	0.172207	0.178965	0.157847	0.137638	0.0828591	0	0.128237	0.167657	0.232644
0.232036	0	0	0.0795649	0.121538	0.100397	0	0	0.179559	0.132333	0.0506887	0	0	0	0.397324	0.114106	0.0480361	0.318407	0.176417	0.0919125	0.17518	0	0.0978932	0.152811	0	0	0.254946	0	0	0.451395	0	0	0.128177	0.343304	0.3215	0	0	0.22036	0.260284	0.304948	0.183174	0.300031	0.182442	0.110438	0.33976	0.161811	0	0.252153	0.26669	0.168443
0.179368	0	0	0.116312	0.11675	0.127675	0	0.347198	0.108135	0.0609173	0.185681	0	0	0	0.200633	0	0.100419	0.213484	0.0757556	0.116233	0.136207	0	0.168364	0.0829202	0	0	0.222221	0	0	0.233587	0	0	0.153802	0.102379	0.0903478	0	0	0.182915	0.120145	0.0973896	0.102464	0.248509	0.123798	0.17643	0.148744	0.0772148	0	0.178437	0.125531	0.187941
0.280597	0	0	0.253946	0.239346	0.147443	0	0	0.0999895	0.184286	0.256871	0	0	0	0.386265	0.159662	0.137261	0.371237	0.301689	0.131712	0.233217	0	0.224256	0.0939749	0	0	0.340934	0	0	0.474726	0	0	0.221313	0.238618	0.163808	0	0	0.213863	0.294287	0.159032	0.197646	0.354481	0.399442	0.300229	0.401082	0.207312	0	0.350156	0.285634	0.226601
0.202908	0	0	0.121976	0.315121	0.115166	0	0.146622	0.287468	0.136061	0.176856	0	0	0	0.325775	0	0.371607	0.288443	0.426459	0.39536	0.235303	0	0.321474	0.323047	0	0	0.169362	0	0	0.41311	0	0	0.259419	0.334316	0.217023	0	0	0.252591	0.301143	0.199691	0.399581	0.278317	0.372117	0.388679	0.302682	0.236363	0	0.408021	0.132521	0.20595
0.234544	0	0	0.0830647	0.252343	0.314846	0	0	0.270581	0.363394	0.204786	0	0	0	0.45992	0.415088	0.32786	0.506753	0.372907	0.178208	0.416107	0	0.455591	0.422638	0	0	0.577437	0	0	0.485609	0	0	0.517456	0.269203	0.743181	0	0	0.448992	0.417891	0.503353	0.334295	0.486352	0.52905	0.311129	0.552612	0.381724	0	0.291048	0.734568	0.252586
0.426593	0	0	0.394549	0.178464	0.475215	0	0	0.416248	0.451074	0.325303	0	0	0	0.574931	0.638109	0.429206	0.349194	0.508006	0.606912	0.696608	0	0.447681	0.484329	0	0	0.576879	0	0	0.525505	0	0	0.626836	0.265949	0.315073	0	0	0.7354	0.771649	0.301668	0.303865	0.479687	0.582658	0.467847	0.600718	0.495151	0	0.432236	0.885256	0.390082
0.431701	0	0	0.149572	0.0595561	0.375598	0	0.018647	0.207604	0.171501	0.13357	0	0	0	0.537449	0	0.20654	0.507098	0.36706	0.286832	0.194115	0	0.317056	0.401646	0	0	0.346851	0	0	0.335833	0	0	0.41016	0.526801	0.484416	0	0	0.341607	0.36612	0.213538	0.217432	0.169681	0.479061	0.394766	0.41829	0.352493	0	0.487236	0.322497	0.241066
0.482827	0	0	0.503228	0.353184	0.64335	0	0	0.691192	0.240573	0.492063	0	0	0	0.637333	0.858903	0.645061	0.463824	0.700786	0.633389	0.947012	0	1.0957	1.03762	0	0	0.71025	0	0	0.578376	0	0	0.333893	0.758196	0.813939	0	0	0.765515	0.670298	0.354016	0.337019	0.430902	0.778647	0.608123	0.639304	0.756145	0	0.673829	0.462662	0.62418
0.28935	0	0	0.507139	0.269178	0.34192	0	0	0.561709	0.441813	0.246683	0	0	0	0.470222	0.271235	0.523044	0.480974	0.27131	0.739168	0.663854	0	0.590099	0.342547	0	0	0.45984	0	0	0.450245	0	0	0.553324	0.408658	0.421455	0	0	0.209908	0.57904	0.276933	0.296513	0.59061	0.554138	0.807595	0.462972	0.532572	0	0.738274	0.464709	0.260511
0.430749	0	0	0.368137	0.405033	0.617144	0	0	0.314106	0.637407	0.224135	0	0	0	0.508486	0.336225	0.415362	0.569511	0.598824	0.500803	0.443616	0	0.633466	0.336204	0	0	0.514067	0	0	0.285543	0	0	0.263768	0.758901	0.939296	0	0	0.469319	0.458961	0.709045	0.213723	0.456224	0.736939	0.929573	0.625633	0.853562	0	0.533592	0.875288	0.659262
0.400855	0	0	0.507736	0.368362	0.380348	0	0	0.479346	0.34742	0.331437	0	0	0	0.559226	0.125877	0.291881	0.374229	0.338121	0.512273	0.593374	0	0.387187	0.298047	0	0	0.48125	0	0	0.381303	0	0	0.376004	0.849079	0.51034	0	0	0.452907	0.617185	0.560298	0.23311	0.537119	0.710066	0.87851	0.540171	0.789879	0	0.550726	0.351516	0.289573
0.532564	0	0	0.125633	0.368156	0.513641	0	0	0.730943	0.543914	0.314249	0	0	0	0.448135	0.382328	0.639283	0.44101	0.656393	0.438359	0.684391	0	0.717093	0.546631	0	0	0.564329	0	0	0.505537	0	0	0.155752	0.375621	0.874262	0	0	0.519843	0.577294	0.887565	0.149301	0.344739	0.659385	0.534275	0.506119	0.964349	0	0.741923	0.590443	0.202749
0.423386	0	0	0.45165	0.612793	0.492735	0	0	0.494482	0.606487	0.219122	0	0	0	0.73355	0.511956	0.487914	0.544283	0.670205	0	1.16709	0	0.378352	0.740302	0	0	1.00225	0	0	0.909953	0	0	0.412812	0.658375	0.698377	0	0	0.223891	0.708945	0.95092	0.409483	0.689118	0.660358	0.50322	0.775162	0.668712	0	0.675831	0.391161	0.135813
0.54312	0	0	0.53055	0.7486	0.218473	0	0	0.728024	0.778683	0.204444	0	0	0	0.907759	1.00167	0.466951	1.06738	0.71909	0.754177	0.888959	0	0.720851	0.662044	0	0	0.405332	0	0	1.74285	0	0	0.382308	1.26253	1.19387	0	0	0.267356	0.326134	1.03494	0.311066	0.811342	0.787747	1.06101	0.907644	0.961742	0	0.823911	1.05006	0.345167
0.744891	0	0	0.713551	0.992736	0.670955	0	0	1.21232	0.982545	0.167501	0	0	0	1.11088	0.634671	0.782465	0.610767	0.889417	0	0.202612	0	0.632159	0.578276	0	0	1.05786	0	0	0.577062	0	0	0.0822612	1.52465	1.13567	0	0.256538	0.435867	0.608824	0.863615	0.293038	0.859345	0.78293	0.798339	0.62694	1.48596	0	0.761712	1.19166	0.807774
0.506621	0	0	0.38132	0.63886	0.306012	0	0	1.1505	1.22691	0.149511	0	0	0	0.781801	0.570185	0.934506	0.477567	0.385492	0.813788	0.745582	0	0.369742	0.676326	0	0	0.508659	0	0	0.401431	0	0	0.909624	0.641838	0.499835	0	0	1.65323	0.806498	1.54143	0.327634	0.734736	1.24364	1.42871	0.854092	1.55874	0	0.93814	1.45499	0.495422
0.631451	0	0	1.00336	0.78792	0.438778	0	0	1.14904	1.66413	0.626633	0	0	0	0.781901	1.40593	0.722147	0.62947	1.09473	0.375703	0.251397	0	0.725857	0.45616	0	0	0.99503	0	0	0.991897	0	0	0.980113	1.19016	1.73553	0	0	0.938304	1.31906	1.40393	0.508033	1.11376	1.39586	1.72881	1.47021	1.57074	0	0.85481	1.80679	0.871929
0.635695	0	0	1.08731	0.597085	0.866573	0	0	0.766289	0.729764	0.621641	0	0	0	1.15288	0.685844	0.732703	0.75259	0.639147	0.803631	0.486179	0	0.922604	0.255865	0	0	1.11571	0	0	1.03549	0	0	0.262044	1.11448	1.27831	0	0	0.577512	1.15404	0.778619	0.385776	1.04572	0.54583	1.3581	0.470705	1.54159	0	0.870114	1.54774	0.926129
0.439749	0	0	0.353423	0.358364	0.405009	0	0	0.678535	0.473191	0.148584	0	0	0	0.806585	0.192532	0.548152	0.206828	0.348772	0.734333	0.514865	0	0.43841	0.476447	0	0	0.872092	0	0	0.168958	0	0	0.456953	0.594243	0.903929	0	0	0.578438	0.708791	0.355234	0.29016	0.695968	0.629337	0.970673	0.389787	0.924266	0	0.383671	0.861016	0.448185
0.866742	0	0	0.623385	0.941729	0.635334	0	0	1.00147	2.21805	0.172804	0	0	0	2.01706	1.18013	1.13271	0.912958	0.74995	0.834208	0.917009	0	0.391552	1.01657	0	0	0.81505	0	0	0.469066	0	0	1.34751	0.874511	1.00353	0	0	2.42859	0.919378	2.02824	0.447438	0.803445	1.09404	1.31282	1.06871	1.74258	0	0.699617	1.5518	0.272393
0.811184	0	0	0.596383	0.63024	0.425432	0	0	1.17649	1.09948	0.230528	0	0	0	0.632111	1.30809	0.891713	0.548055	1.35639	1.7078	0.524905	0	0.458348	0.541075	0	0	0.648023	0	0	1.32858	0	0	1.44548	1.24949	0.54762	0	0	2.04273	0.58917	1.5114	0.531279	0.583496	1.6365	1.36247	0.754561	1.51815	0	1.27792	2.27812	0.474757
1.58853	0	0	1.14146	0.889401	0.939634	0	0	3.03982	1.18789	0.553816	0	0	0	1.03403	3.63401	1.24446	0.718419	2.67701	1.25848	1.47949	0	0.746785	0.887986	0	0	1.11779	0	0	1.88702	0	0	1.7687	1.65271	1.91971	0	0	2.67296	1.30902	4.40831	0.499848	1.14813	1.0575	0.936347	0.768644	3.12172	0	2.31657	3.45726	0.80341
1.12053	0	0	0.861837	0.477743	0.598313	0	0	1.41784	1.84931	0.199525	0	0	0	0.904026	2.04868	0.529801	0.247536	1.958	1.47714	0.576667	0	1.08423	0.914212	0	0	0.73319	0	0	1.66986	0	0	1.24425	1.31164	0.686891	0	0	2.21753	0.443546	2.72012	0.382549	0.482286	1.02132	1.65614	0.98995	2.31629	0	1.52919	2.18603	0.19459
0.798197	0	0	1.03793	0.700586	0.426181	0	0	1.84852	1.57116	0.294075	0	0	0	1.44525	1.61143	1.59947	0.550881	1.36587	0.847541	1.14005	0	0.465444	1.00841	0	0	0.856362	0	0	0.708198	0	0	1.90006	1.29429	1.3089	0	0	3.03692	1.22015	3.2041	0.390696	1.17793	1.74894	1.38896	0.834555	2.74636	0	1.41741	2.39444	0.525246
0.950042	0	0	0.441021	0.683627	0.873547	0	0	0.96564	1.27291	0.378787	0	0	0	1.45484	1.32877	1.00749	0.230065	1.63215	2.5141	0.807428	0	0.734475	1.08533	0	0	1.36927	0	0	1.11252	0	0	1.66533	1.19499	1.15118	0	0	1.78891	0.85353	1.63806	0.492346	0.365728	1.25432	2.27962	0.349285	2.0249	0	1.20325	2.05311	0.839647
0.573072	0	0	0.0600067	0.703457	0.588802	0	0	1.21732	1.07288	0.34298	0	0	0	1.19417	0.353871	0.623886	0.803099	0.824193	0.351747	0.369088	0	0.906958	0.836944	0	0	1.01857	0	0	0.306573	0	0	0.968705	1.19729	1.4043	0	0	0.925947	0.935351	0.773529	0.140962	0.715808	1.10002	1.73441	0.800183	1.63065	0	0.651914	0.962111	0.624482
0.469305	0	0	0.675322	0.50214	0.433217	0	0	0.479092	0.836645	0.266759	0	0	0	0.565154	1.18719	0.469323	0.363136	0.862442	0.737731	0.700671	0	0.519675	0.573837	0	0	0.592441	0	0	0.780124	0	0	0.502983	0.942693	0.739047	0	0	0.673698	0.524511	1.01464	0.472728	0.586101	0.981992	0.959385	1.00872	1.20491	0	0.996837	0.953316	0.452989
0.357643	0	0	0.517878	0.435887	0.508322	0	0	1.18333	0.845033	0.137384	0	0	0	0.83561	1.10381	0.71598	0.607559	0.896078	0.287158	0.544846	0	0.502823	0.239232	0	0	0.665151	0	0	0.470777	0	0	0.415699	1.34074	1.24562	0	0	1.02224	0.756675	1.61291	0.247369	0.830767	0.760892	0.902351	0.60189	1.53508	0	0.695314	1.24776	0.4987
0.704858	0	0	0.546081	0.474301	0.387694	0	0	0.42534	0.915447	0.170997	0	0	0	1.50794	0.901497	1.34518	0.561109	1.41072	0	0.357893	0	1.0248	1.1681	0	0	0.871865	0	0	1.0783	0	0	1.00762	0.840659	0.683267	0	0.0206985	0.998747	0.507433	0.91438	0.126958	0.43487	0.636856	1.52322	0.527803	1.0147	0	0.920904	1.03551	0.977415
0.74577	0	0	0.194496	0.644408	0.327991	0	0	0.956142	0.651943	0.228486	0	0	0	0.612279	0.928187	0.830672	0.326134	0.927881	0.949716	0.431266	0	0.744415	0.569972	0	0	0.632617	0	0	0.891963	0	0	0.593596	0.887114	0.625002	0	0	1.21397	0.407967	1.27292	0.191264	0.362088	0.814895	1.27823	0.537116	1.61988	0	0.888171	0.845278	0.280196
0.370181	0	0	0.41221	0.189359	0.598174	0	0	0.551966	0.468288	0.298645	0	0	0	0.414335	0.78236	0.334038	0.340995	0.345898	0.465293	0.416843	0	0.648478	0.260818	0	0	0.3808	0	0	0.599211	0	0	0.312316	0.482345	0.527093	0	0	0.434128	0.430274	0.750546	0.239086	0.490153	0.608604	0.542938	0.53956	0.752702	0	0.678101	0.729933	0.343266
1.22014	0	0	0.989747	1.16006	0.72961	0	0	1.17569	1.69036	0.280239	0	0	0	0.733526	2.40879	0.622083	0.57923	1.49796	1.53961	0.491575	0	0.978694	1.19043	0	0	0.892034	0	0	1.89355	0	0	1.99362	1.50913	1.16018	0	0	1.7052	1.03092	1.93825	0.599042	1.17231	2.10557	2.18267	1.4861	2.31612	0	1.89825	2.96264	1.2482
1.03987	0	0	0.295202	0.554078	0.258218	0	0	0.975694	0.986395	0.166155	0	0	0	1.19694	0.539675	0.448486	0.22735	1.23843	1.7426	0.240157	0	0.791453	0.705343	0	0	0.578195	0	0	0.860789	0	0	2.04174	1.26	0.743503	0	0	1.60515	0.719262	1.22402	0.0200331	0.617926	1.27434	1.49535	0.590907	2.09683	0	1.34758	1.0816	0.397346
1.05677	0	0	0.558653	0.606922	0.224809	0	0	1.38405	1.12743	0.195604	0	0	0	0.715918	1.57856	0.684155	0.249503	1.78106	1.43253	0.474117	0	0.789009	0.754211	0	0	0.582101	0	0	1.58645	0	0	1.24342	1.50346	0.533963	0	0	2.13761	0.661086	2.0375	0.415863	0.723189	1.44959	1.73016	0.662533	1.96207	0	1.50919	2.07401	0.355969
1.16104	0	0	0.998466	0.66656	0.380177	0	0	1.29606	2.35964	0.457234	0	0	0	1.61105	1.40596	1.4678	0.782746	0.970661	0.998536	0.91597	0	0.459327	0.837403	0	0	1.02028	0	0	0.740385	0	0	1.48452	1.08668	0.829615	0	0	2.97803	0.960322	2.52994	0.569406	0.907015	1.91055	1.42179	0.987966	2.33949	0	1.19511	2.13518	0.370823
1.70928	0	0	1.17239	0.817411	0.844232	0	0	2.30581	1.55849	0.332404	0	0	0	0.83305	3.59158	1.00656	0.446243	2.36132	1.66364	1.00447	0	1.10445	1.17366	0	0	0.64484	0	0	2.56101	0	0	1.11176	1.75642	1.44338	0	0	2.51271	0.907412	4.11538	0.693327	1.09416	0.831803	1.34932	1.1327	2.93171	0	2.38912	3.12953	0.912393
1.27264	0	0	0.454439	0.826117	0.725319	0	0	1.84329	1.52296	0.435236	0	0	0	1.15048	1.73048	1.18135	1.2161	1.35158	1.35018	0.889281	0	0.911747	0.851383	0	0	1.75454	0	0	0.669355	0	0	1.43476	0.893835	1.58735	0	0	2.07844	1.13188	1.76939	0.550423	0.717794	1.37372	1.53275	0.990259	3.04536	0	0.821258	2.32126	1.44906
0.525632	0	0	0.371969	0.674966	0.373028	0	0	0.626862	0.819491	0.119476	0	0	0	1.14673	0.669686	0.546576	0.913083	0.630749	0.894232	0.322482	0	0.778306	0.662933	0	0	0.935962	0	0	0.647539	0	0	0.945448	1.15966	0.847561	0	0	0.816695	0.751056	0.7136	0.042682	0.273588	1.04003	1.50627	0.793566	1.31953	0	0.768982	0.664973	0.475729
0.612392	0	0	0.428021	0.576683	0.532018	0	0	1.23682	1.55757	0.0882403	0	0	0	0.628789	0.513744	0.724023	0.389958	1.27158	0.344084	0.455773	0	0.558313	0.882522	0	0	0.443593	0	0	0.346115	0	0	1.40283	0.910147	0.885167	0	0	1.64221	0.625478	1.63386	0.235969	0.476926	0.888152	1.40882	0.898515	1.37202	0	1.00956	1.41247	0.360002
0.407659	0	0	0.457277	0.570849	0.434757	0	0.0378189	0.941129	0.491342	0.341577	0	0	0	0.970994	0	0.806119	0.39932	0.490796	0.264327	0.575692	0	0.982283	0.614974	0	0	0.397914	0	0	0.354871	0	0	0.807861	0.984991	0.56161	0	0	0.628075	0.553306	0.761389	0.188804	0.456844	0.441792	1.39021	0.361109	1.15888	0	0.592851	0.426969	0.585069
1.4725	0	0	0.487466	0.695468	0.612798	0	0	1.47835	1.60797	0.41893	0	0	0	0.973969	1.59113	1.33642	0.439133	1.66581	1.02679	0.910534	0	0.582717	0.942713	0	0	0.838097	0	0	0.912448	0	0	1.6822	1.11297	1.05059	0	0	2.0852	0.800177	2.25157	0.404351	0.708319	1.51751	1.86821	0.847457	1.66425	0	1.2491	2.32685	0.384801
0.692489	0	0	1.62154	1.10091	1.2471	0	0	3.64889	0.64979	0.626037	0	0	0	1.23418	5.68537	0.939105	1.39793	1.51935	0.87734	2.21785	0	1.09647	1.60749	0	0	2.38448	0	0	3.08676	0	0	0.893212	1.22326	1.88164	0	0	1.40643	1.8985	4.29556	0.582855	1.48483	0.635621	0.969516	0.400797	2.42043	0	1.39437	3.80998	1.16739
1.31192	0	0	1.28318	0.97425	0.717998	0	0	1.65223	0.693522	0.286374	0	0	0	0.415523	3.48429	0.588386	0.172764	2.04169	1.6223	0.407734	0	1.75425	0.745371	0	0	0.26841	0	0	3.40656	0	0	0.588163	2.77429	0.395957	0	0	2.39583	0.669394	3.2383	0.569437	1.62524	1.91156	1.928	1.18754	2.71711	0	2.43656	2.54503	1.09495
0.78869	0	0	0.797616	0.841693	0.281475	0	0	1.09306	2.04944	0.287333	0	0	0	1.55411	1.2486	0.971875	0.448628	0.825025	0.291284	0.770325	0	0.652754	0.803106	0	0	0.378525	0	0	0.643502	0	0	1.34846	1.07827	1.00648	0	0	2.02091	0.867746	2.20309	0.319353	0.882468	1.47563	1.60211	1.11619	1.88827	0	0.996727	1.66996	0.285344
0.627423	0	0	0.516398	0.938559	0.781466	0	0	1.06351	1.1099	0.422495	0	0	0	1.38507	1.99269	0.87279	1.03613	1.17578	1.33174	0.500864	0	0.768216	0.701775	0	0	1.14111	0	0	1.18499	0	0	1.19384	1.37298	1.33882	0	0	1.75913	1.03683	1.83223	0.226015	1.64657	1.79045	1.49342	1.66935	2.85144	0	1.29091	2.12492	1.07056
1.76394	0	0	0.921378	1.07087	0.643682	0	0	1.7216	0.934023	0.370655	0	0	0	0.700541	3.56803	0.855584	0.17239	2.13651	1.38117	0.906159	0	1.7557	1.50694	0	0	0.122391	0	0	3.44652	0	0	0.536443	1.84552	0.559918	0	0	1.51096	0.544511	2.8066	0.487061	1.13276	1.88298	2.38784	1.02097	1.81451	0	1.89328	3.49998	0.523302
0.777287	0	0	0.331991	1.09312	0.45147	0	0	1.60449	1.18718	0.324514	0	0	0	1.01292	0.821788	1.04194	0.693365	0.664755	0.0119453	0.611403	0	0.58104	0.823776	0	0	1.33114	0	0	0.353722	0	0	1.0755	0.517944	1.27209	0	0	1.32166	1.13769	1.22973	0.290732	1.20173	1.65046	1.46713	1.02171	2.11555	0	0.604469	1.44904	0.612683
0.308932	0	0	0.518228	0.235289	0.585685	0	0	0.387293	0.883555	0.1056	0	0	0	1.28506	0.488939	0.202954	0.569756	0.641446	0.805263	0.447439	0	0.650718	0.441059	0	0	0.340706	0	0	0.567426	0	0	0.783802	0.862256	0.533251	0	0	0.517234	0.574994	0.768118	0.48496	0.782252	0.677364	1.18886	0.809959	0.896798	0	0.822328	0.457263	0.408169
0.323321	0	0	0.185234	0.244294	0.16625	0	0	0.185238	0.199685	0.242797	0	0	0	0.722823	1.15044	0.151169	0.410474	0.115989	0.0378197	0.189071	0	0.249348	0.175611	0	0	0.293277	0	0	1.03097	0	0	0.242126	0.325987	0.201436	0	0	0.0916873	0.129819	0.594003	0.11105	0.427951	0.243577	0.0969798	0.336939	0.189973	0	0.132206	0.368062	0.216257
0.243496	0	0	0.224608	0.194518	0.0961121	0	0	0.128513	0.170895	0.250452	0	0	0	0.444654	0.139848	0.154841	0.171418	0.109542	0.158559	0.225545	0	0.212402	0.256588	0	0	0.291628	0	0	0.50791	0	0	0.219759	0.146614	0.15016	0	0	0.163855	0.144501	0.231333	0.0514187	0.272961	0.259952	0.199383	0.11676	0.166624	0	0.226691	0.223244	0.216867
0.137165	0	0	0.0976811	0.118459	0.11871	0	0.0740206	0.153455	0.0564558	0.0577346	0	0	0	0.251093	0	0.121381	0.227146	0.0979921	0.0823915	0.144566	0	0.121441	0.122617	0	0	0.229984	0	0	0.282223	0	0	0.126574	0.18248	0.288733	0	0	0.206298	0.115072	0.21451	0.136629	0.220699	0.133787	0.092903	0.175559	0.156666	0	0.108416	0.229223	0.180024
0.192754	0	0	0.215417	0.176011	0.0992097	0	0.265384	0.111643	0.0524735	0.159705	0	0	0	0.204655	0	0.140422	0.180577	0.1499	0.191859	0.175804	0	0.120343	0.170852	0	0	0.235639	0	0	0.275987	0	0	0.194622	0.0698824	0.107005	0	0	0.23947	0.239876	0.122029	0.149137	0.28781	0.104959	0.250177	0.136137	0.0937142	0	0.279648	0.137846	0.23487
0.31768	0	0	0.0966675	0.112148	0.154028	0	0.0222491	0.0840317	0.123651	0.167047	0	0	0	0.258425	0	0.153991	0.325239	0.185396	0.275128	0.117579	0	0.247908	0.0712622	0	0	0.250718	0	0	0.405948	0	0	0.194547	0.29706	0.169578	0	0	0.271223	0.168066	0.145333	0.244759	0.164957	0.400277	0.220265	0.217562	0.244631	0	0.15165	0.134823	0.252145
0.339885	0	0	0.415736	0.218489	0.291223	0	0.0249579	0.27666	0.221777	0.179845	0	0	0	0.339962	0	0.169792	0.199263	0.2334	0.277647	0.238775	0	0.328465	0.345843	0	0	0.261997	0	0	0.376441	0	0	0.228262	0.133274	0.263102	0	0	0.187156	0.227814	0.174789	0.0726862	0.254231	0.284357	0.435146	0.294166	0.325599	0	0.331965	0.321169	0.30394
0.279725	0	0	0.0896251	0.328513	0.302203	0	0	0.106562	0.456796	0.242216	0	0	0	0.728767	0.262159	0.497102	0.594353	0.338156	0.452631	0.391492	0	0.522116	0.324546	0	0	0.374071	0	0	0.470922	0	0	0.388551	0.384518	0.230676	0	0	0.559943	0.424478	0.27813	0.276223	0.422228	0.34379	0.494962	0.406046	0.338875	0	0.649238	0.408305	0.298606
0.444104	0	0	0.363078	0.205551	0.393389	0	0	0.465759	0.450848	0.346737	0	0	0	0.422287	0.443661	0.288119	0.232697	0.436907	0.24335	0.458915	0	0.6502	0.504246	0	0	0.381133	0	0	0.453463	0	0	0.491582	0.380635	0.211787	0	0	0.550156	0.471415	0.304408	0.345089	0.234043	0.379643	0.458659	0.673648	0.407826	0	0.4627	0.698993	0.400031
0.348346	0	0	0.356233	0.0864661	0.368351	0	0.0695978	0.376014	0.380321	0.304089	0	0	0	0.42227	0	0.237903	0.335315	0.225778	0.24169	0.364476	0	0.274721	0.345769	0	0	0.258651	0	0	0.263154	0	0	0.317041	0.426576	0.282394	0	0	0.246011	0.333363	0.0900328	0.18071	0.334731	0.453458	0.475201	0.447769	0.322419	0	0.274523	0.24416	0.396814
0.27025	0	0	0.586246	0.173223	0.425899	0	0	0.361626	0.606683	0.345112	0	0	0	0.286666	0.322567	0.346974	0.288284	0.569737	0.500567	0.78033	0	0.585396	0.525489	0	0	0.365651	0	0	0.277503	0	0	0.372562	0.5385	0.609734	0	0	0.495555	0.683696	0.358767	0.452155	0.379265	0.509082	0.400901	0.818997	0.524566	0	0.404952	0.619501	0.267702
0.173904	0	0	0.358848	0.28355	0.683021	0	0	0.50179	0.786296	0.0420063	0	0	0	0.448061	0.359956	0.250935	0.414806	0.468231	0.194363	0.776183	0	0.454422	0.421011	0	0	0.758496	0	0	0.403116	0	0	0.461148	0.712434	0.821523	0	0	0.327968	0.614091	0.840162	0.356422	0.356134	0.563709	0.632298	0.728688	0.373462	0	0.763941	0.507566	0.248923
0.339739	0	0	0.32442	0.506197	0.52892	0	0	0.552177	0.780528	0.418571	0	0	0	0.801448	0.213633	0.476605	0.690261	0.432538	0.540467	0.434083	0	0.47451	0.403819	0	0	0.756057	0	0	0.575612	0	0	0.311418	0.719044	1.00257	0	0	0.432402	0.803483	0.627048	0.386218	0.604551	0.965152	1.21522	0.785604	1.05946	0	0.430423	0.799876	0.376909
0.106809	0	0	0.356871	0.438829	0.521541	0	0.0706819	0.333273	0.592644	0.293746	0	0	0	0.556933	0	0.533835	0.536625	0.455439	0.750184	0.419508	0	0.440528	0.1378	0	0	0.391456	0	0	0.208249	0	0	0.569979	0.777563	0.670057	0	0	0.499029	0.503143	0.396068	0.131865	0.644509	0.727583	1.0512	0.466539	0.919287	0	0.363244	0.509061	0.329729
0.38264	0	0	0.0908068	0.356564	0.424712	0	0	0.841713	0.484616	0.164374	0	0	0	0.649671	0.343438	0.581366	0.648477	0.513302	0.477338	0.483322	0	0.579986	0.341227	0	0	0.543486	0	0	0.439687	0	0	0.329447	0.285774	0.871035	0	0	0.517141	0.676792	0.735982	0.118306	0.57018	0.739439	0.633303	0.426723	1.22976	0	0.443385	0.507183	0.0845107
0.29342	0	0	0.502814	0.263205	0.620156	0	0	0.387097	0.50241	0.142112	0	0	0	0.662423	0.567269	0.613022	0.673218	0.966455	0.396954	0.689902	0	0.727752	0.469712	0	0	0.723022	0	0	0.86922	0	0	0.200468	1.1177	0.817354	0	0	0.329199	0.406566	0.907048	0.261065	0.454326	0.670368	1.07834	0.3562	1.06239	0	0.946501	0.444748	0.486471
0.93574	0	0	0.598329	0.841221	0.413183	0	0	1.28704	0.340608	0.294609	0	0	0	0.958216	0.732614	1.013	0.850563	0.499504	0.566466	0.562949	0	0.507949	0.305569	0	0	1.45073	0	0	0.909925	0	0	0.414159	0.827129	1.24976	0	0	0.863007	0.565951	0.797653	0.329624	0.746719	0.930265	1.49505	0.321343	1.06364	0	0.304199	0.869438	0.937369
0.467306	0	0	0.424263	1.0713	0.56054	0	0	1.17268	1.07042	0.183573	0	0	0	1.43954	0.484213	0.826524	0.439888	0.737135	0	0.376126	0	0.992762	0.821062	0	0	0.764957	0	0	0.402389	0	0	0.672634	0.968533	0.792274	0	0.394118	0.660794	0.647273	0.760581	0.178652	0.675929	0.895989	1.48187	0.901933	1.58005	0	0.42488	0.634149	0.616482
0.988341	0	0	0.613208	0.744511	0.34083	0	0	1.40369	2.2155	0.375537	0	0	0	0.955692	2.06148	1.17784	0.784418	1.28621	1.17765	1.11963	0	0.468742	1.05694	0	0	0.815731	0	0	1.22604	0	0	0.994103	1.3201	1.03808	0	0	2.92833	0.918472	3.12111	0.530648	1.16334	1.52945	1.78205	1.34051	2.6647	0	1.53971	2.03664	0.361997
0.847302	0	0	0.887132	0.814941	0.72933	0	0	1.35734	1.36152	0.413095	0	0	0	1.58475	0.838799	0.861059	0.509279	0.802461	0.371577	0.690441	0	1.00242	0.96924	0	0	1.14909	0	0	0.623094	0	0	1.55836	1.28612	1.10632	0	0	1.40495	1.05684	1.34076	0.299739	0.975384	1.63781	2.4297	1.39809	1.77262	0	0.88219	1.4361	0.36693
0.437333	0	0	0.633788	0.772095	0.840505	0	0	1.01278	1.30074	0.500557	0	0	0	1.11741	1.03051	0.911975	1.11005	0.907486	0.876277	0.622932	0	0.795462	0.547187	0	0	1.45696	0	0	0.810677	0	0	0.623939	0.857846	1.28934	0	0	0.741779	1.21618	1.12698	0.316243	1.11909	0.866863	1.48316	0.678366	1.99731	0	0.849211	1.28273	0.579159
0.444383	0	0	0.717422	0.55959	0.4884	0	0	0.915683	0.447817	0.223088	0	0	0	0.886225	0.432768	0.735274	0.515147	0.394507	0.600223	0.828935	0	0.695161	0.807221	0	0	1.01055	0	0	0.102392	0	0	0.441203	0.596551	0.869638	0	0	0.611021	0.723084	0.65369	0.377008	0.69777	0.698823	1.16284	0.56617	1.35254	0	0.453623	0.819248	0.548317
0.846354	0	0	0.983669	0.4361	0.536244	0	0	0.97217	1.98912	0.101712	0	0	0	1.64008	1.58995	0.934613	0.858404	1.53828	1.66667	0.615279	0	0.585122	0.737175	0	0	0.822362	0	0	0.864877	0	0	1.1057	1.11542	0.792696	0	0	2.49266	0.884453	2.491	0.585145	0.832441	0.814746	1.34479	1.03948	2.26211	0	1.36638	2.16855	0.577994
1.03253	0	0	0.775325	0.84545	0.747257	0	0	2.17703	1.3247	0.196832	0	0	0	1.24769	1.84134	1.04811	0.534612	1.9449	0.927509	0.996841	0	0.500271	0.880488	0	0	0.746303	0	0	1.15475	0	0	1.57508	1.35572	0.887399	0	0	2.33308	0.884808	2.6921	0.577359	0.697629	1.57864	1.9192	0.657426	1.82042	0	1.27574	2.41991	0.299672
0.951928	0	0	1.17383	0.596689	0.700527	0	0	2.37518	1.55998	0.512875	0	0	0	1.17903	2.17537	1.32743	0.580889	1.86079	0.168854	1.43532	0	0.2429	0.813746	0	0	1.1225	0	0	0.677353	0	0	1.59218	1.29991	1.77827	0	0	2.66381	1.2562	3.93366	0.465506	1.24213	0.845476	0.710195	0.834219	2.69436	0	1.53739	2.59916	0.427125
0.960337	0	0	0.748656	0.665608	0.303144	0	0	1.50475	1.46114	0.285942	0	0	0	1.16232	1.70524	0.793206	0.384877	1.11883	0.599354	1.02416	0	0.44992	0.962097	0	0	0.549612	0	0	0.912862	0	0	0.693513	1.02115	0.715547	0	0	2.44415	0.942674	2.73551	0.32523	1.097	0.960756	1.32238	0.817573	2.31819	0	1.00241	1.59898	0.121564
0.779935	0	0	0.605404	0.801033	0.481437	0	0	2.31706	1.92171	0.173675	0	0	0	1.59138	1.54287	0.983872	0.70373	1.32849	0.0983386	1.08836	0	0.702651	0.979877	0	0	1.03901	0	0	0.41307	0	0	1.91609	1.30448	1.6737	0	0	2.17699	1.36697	2.84833	0.31112	1.06622	1.13094	1.56908	0.687352	2.43072	0	1.32096	1.30791	0.427227
0.396404	0	0	0.50105	0.778278	0.470026	0	0	0.918832	1.19879	0.208496	0	0	0	1.21908	0.777652	0.547312	0.23679	0.864172	1.26213	0.759847	0	0.672241	0.798537	0	0	0.836724	0	0	0.715633	0	0	1.23237	0.93314	0.815223	0	0	0.953919	0.68455	1.03692	0.206677	0.342061	0.837416	1.8386	0.490137	1.49288	0	1.29496	1.25217	0.415907
0.34934	0	0	0.820358	0.62761	0.532694	0	0	1.62701	0.994895	0.384344	0	0	0	1.86495	1.05048	1.5501	0.693599	0.2513	0	1.3819	0	0.809077	1.1333	0	0	0.754827	0	0	0.38424	0	0	1.46512	1.57151	1.9471	0	0	2.43178	1.06218	2.28801	0.319345	1.12759	1.73777	1.74476	0.983569	2.05571	0	0.830871	1.61792	0.854288
0.327937	0	0	0.497762	0.315655	0.440913	0	0	0.631557	0.570717	0.276725	0	0	0	0.603902	1.04029	0.430543	0.393623	0.721002	1.18995	0.610648	0	0.785621	0.585981	0	0	0.642362	0	0	0.892987	0	0	0.429961	1.05931	0.606017	0	0	0.762413	0.517592	0.927636	0.390847	0.254586	0.78586	1.26103	0.762453	1.11818	0	0.495727	1.04048	0.538097
0.393976	0	0	0.510662	0.734674	0.282322	0	0	1.41599	1.12015	0.390599	0	0	0	0.791028	1.31261	0.869587	0.675398	0.727495	0	0.507748	0	0.498678	0.640014	0	0	1.032	0	0	0.526677	0	0	0.772757	0.862531	1.00495	0	0.00442135	1.2263	0.789714	1.70557	0.100122	0.897812	1.01804	0.930846	0.558992	1.80452	0	0.798396	1.04541	0.369188
0.849255	0	0	0.422587	1.29049	0.593365	0	0	1.11152	1.42365	0.193539	0	0	0	1.79682	1.44972	1.07107	1.11355	1.22642	0.606019	0.641087	0	0.855963	1.5456	0	0	1.23847	0	0	1.43399	0	0	1.26526	1.8736	1.38823	0	0	1.59282	0.914569	1.48133	0.205745	1.16612	1.83291	2.30038	1.6855	2.14146	0	0.971715	1.13718	0.787298
1.00986	0	0	0.0989876	0.703295	0.354651	0	0	1.20805	0.341674	0.282049	0	0	0	0.85294	1.26417	0.784121	0.46691	0.75997	1.26244	0.757058	0	0.740899	0.742082	0	0	0.762007	0	0	1.12285	0	0	0.708704	1.35041	0.637022	0	0	1.05612	0.621364	1.18006	0.148643	0.657952	1.2476	1.51039	0.678936	1.51481	0	0.602687	1.06686	0.145797
0.450942	0	0	0.964713	0.70213	0.746259	0	0	0.706465	1.44969	0.18915	0	0	0	1.31577	1.50739	0.304688	0.273301	0.908412	0	1.30835	0	0.677967	1.01027	0	0	0.626968	0	0	1.15625	0	0	0.455407	0.775189	0.872562	0	0.141147	0.361512	0.841101	1.37713	0.599651	0.4085	0.68863	1.0706	0.766921	1.03029	0	0.71009	1.20708	0.647387
0.366302	0	0	0.294358	0.721973	0.433919	0	0	0.891808	1.17239	0.120254	0	0	0	0.913892	1.42161	0.834934	0.439528	1.18589	0.346794	0.498388	0	0.877441	0.99496	0	0	0.301698	0	0	1.12503	0	0	0.944833	1.4882	0.833384	0	0	0.941646	0.650689	1.46382	0.165644	0.737229	1.36456	1.77855	1.17537	1.55672	0	0.959427	1.40998	0.751408
1.0985	0	0	0.55054	0.505306	0.173012	0	0	1.17913	1.3424	0.249837	0	0	0	1.08606	1.08215	0.826746	0.220907	1.41873	1.50151	0.665071	0	0.814415	0.765508	0	0	0.628002	0	0	1.0496	0	0	1.88466	1.42835	0.879191	0	0	2.36348	0.776794	2.08263	0.209936	0.953235	1.58612	1.61585	0.770668	2.56978	0	1.59154	1.67045	0.557074
0.918117	0	0	0.563242	0.573676	0.373519	0	0	1.23394	0.940968	0.12683	0	0	0	0.758811	1.71129	0.757138	0.176737	1.85382	1.55655	0.385202	0	0.781287	0.616025	0	0	0.645778	0	0	1.68645	0	0	1.29847	1.61859	0.498056	0	0	2.00862	0.398579	2.09249	0.431127	0.580698	1.38685	1.60941	0.781121	1.82651	0	1.63436	2.15667	0.396343
0.853478	0	0	0.429459	0.380395	0.588754	0	0	0.969385	1.60518	0.142913	0	0	0	1.59727	0.72928	0.826601	0.578099	1.02569	1.04228	0.571718	0	0.166642	0.654467	0	0	0.658078	0	0	0.598065	0	0	1.39414	1.1735	0.571362	0	0	1.94631	0.54355	1.71499	0.25601	0.551489	0.994231	1.3724	0.563586	1.67444	0	1.35289	1.23908	0.300242
1.40932	0	0	0.941395	0.475861	0.657927	0	0	1.94197	1.63365	0.305839	0	0	0	0.838239	2.71152	1.17911	0.738343	1.62415	0.569158	1.00107	0	0.624441	0.736282	0	0	0.919134	0	0	1.17685	0	0	1.40345	0.973145	1.75263	0	0	1.88522	1.05606	3.72144	0.453529	1.1468	0.627234	0.653542	1.1871	2.77065	0	1.69778	2.22187	0.663404
0.506046	0	0	0.501891	0.598771	0.450369	0	0	1.30468	1.45691	0.191634	0	0	0	0.748174	0.729875	0.200269	0.711696	0.893776	0.679863	0.548633	0	0.608716	0.576484	0	0	0.850883	0	0	0.451439	0	0	1.37615	0.874078	0.962799	0	0	0.703182	0.836064	0.914245	0.170838	0.479629	1.22166	1.09409	0.419041	1.45403	0	0.855339	1.44617	0.245849
0.485832	0	0	0.597696	0.636796	0.312982	0	0	0.940456	0.844673	0.583669	0	0	0	1.10588	0.86841	0.879734	0.357313	0.897632	0.129142	0.837207	0	0.396979	0.623389	0	0	0.74352	0	0	0.533626	0	0	0.699818	0.726413	0.950967	0	0	1.15591	1.16466	1.5835	0.112846	0.613048	1.00917	1.33962	0.859931	1.22817	0	0.661794	0.871997	0.718324
1.31588	0	0	0.614193	1.07471	0.73207	0	0	1.89966	1.36355	0.238894	0	0	0	0.934891	1.31062	1.14199	0.347571	1.7222	0.979555	0.814805	0	0.764281	1.11075	0	0	0.518922	0	0	0.687973	0	0	1.8671	1.35954	1.13237	0	0	2.21403	0.857752	2.30838	0.360209	0.683547	1.27442	2.08881	1.12003	2.09308	0	1.43103	1.48406	0.571659
0.801145	0	0	0.121125	0.567075	0.690281	0	0	1.1712	0.822772	0.209414	0	0	0	0.928668	0.452955	0.4003	0.84823	0.737997	0.788467	0.465268	0	0.805899	0.701517	0	0	0.98241	0	0	0.36906	0	0	0.943243	1.24093	0.654083	0	0	0.809275	0.687561	0.880639	0.259821	0.699674	0.934077	1.50081	0.814575	1.65654	0	0.90585	0.786341	0.0809019
0.942171	0	0	0.346692	0.671065	0.569346	0	0	1.79378	0.837898	0.251212	0	0	0	0.517544	2.50266	0.721464	0.383087	1.68423	1.34674	1.06311	0	0.628939	0.775916	0	0	0.627369	0	0	2.00082	0	0	1.02971	1.52241	1.06388	0	0	1.39752	0.781242	2.51699	0.464252	0.888404	1.29605	1.55389	0.731375	1.74837	0	1.55331	2.47167	0.451219
0.901783	0	0	0.978083	0.723889	0.885493	0	0	1.91869	1.0689	0.450101	0	0	0	1.06106	3.67048	0.624548	0.65039	1.79896	1.03341	0.868754	0	1.01122	1.07194	0	0	1.45099	0	0	2.44069	0	0	0.685546	1.13347	1.0202	0	0	1.63688	0.945415	3.01181	0.54613	0.72679	0.390805	1.32194	0.703106	1.94725	0	1.24162	2.38257	0.741344
0.989714	0	0	1.22455	0.956238	0.831932	0	0	2.62948	1.03777	0.412541	0	0	0	1.30651	4.31533	1.08869	0.456219	1.77312	0.750717	1.37804	0	0.93783	1.19564	0	0	0.85483	0	0	2.86508	0	0	0.712041	2.08199	1.1662	0	0	2.19517	1.09256	4.40411	0.632255	1.86364	1.09967	1.22814	0.742486	2.68931	0	2.10509	2.9825	0.689379
0.571201	0	0	0.438383	0.58079	0.362046	0	0	0.958883	1.65463	0.144205	0	0	0	1.32408	0.720075	0.601646	0.295864	1.36017	0.359935	0.515324	0	0.526143	0.540256	0	0	0.41514	0	0	0.374555	0	0	1.3939	0.872819	0.82141	0	0	1.3689	0.644976	1.54814	0.245598	0.397592	0.755629	1.25386	0.580675	1.39314	0	0.948428	0.968633	0.478931
0.229937	0	0	0.216672	0.522301	0.509044	0	0	0.856748	1.15194	0.149456	0	0	0	1.19795	0.646254	0.425881	0.652632	0.874743	0.79122	0.353801	0	0.680417	0.703885	0	0	0.569948	0	0	0.673054	0	0	0.951192	1.20732	0.890087	0	0	0.718659	0.512205	0.83391	0.0241325	0.642288	0.896399	1.3956	0.615271	1.50717	0	1.10479	1.09315	0.44144
0.896977	0	0	0.521045	0.740079	0.661193	0	0	1.73646	1.32285	0.132859	0	0	0	0.754946	2.42526	0.903458	0.338361	1.79796	1.06741	1.02516	0	0.882889	0.898555	0	0	0.666797	0	0	1.70779	0	0	1.19549	1.48029	1.13902	0	0	1.46356	0.74978	2.64388	0.52979	0.570675	1.13633	1.70326	0.635639	1.67768	0	1.11444	2.78148	0.406594
0.640525	0	0	0.475982	0.684293	0.525884	0	0	0.680186	1.74538	0.206416	0	0	0	1.01212	0.726478	0.569025	0.0792505	1.50835	2.05035	0.362516	0	1.05207	0.723912	0	0	0.964612	0	0	0.899423	0	0	1.85166	1.33869	1.24822	0	0	1.41238	0.478164	1.05593	0.237573	0.271537	1.27984	2.00906	0.951627	1.92641	0	1.67069	1.76528	0.680417
0.617502	0	0	0.718838	0.461546	0.606583	0	0	1.05426	1.22018	0.222756	0	0	0	1.43221	0.942397	0.158045	0.369636	0.928715	1.65738	0.594494	0	0.985142	0.672177	0	0	0.955908	0	0	1.03679	0	0	1.48657	0.913992	0.764792	0	0	0.66571	1.25524	0.859429	0.388657	0.652077	0.928173	1.6409	0.773393	1.38239	0	1.25965	0.936605	0.5236
0.376231	0	0	0.222063	0.249282	0.196755	0	0	0.241767	0.223635	0.181112	0	0	0	0.829423	1.3594	0.168168	0.450165	0.0923778	0.113971	0.190039	0	0.343892	0.201806	0	0	0.307934	0	0	1.14589	0	0	0.302567	0.384763	0.261798	0	0	0.0686014	0.113548	0.652421	0.196645	0.478419	0.309114	0.107211	0.329632	0.202754	0	0.157573	0.389844	0.22505
0.153313	0	0	0.114199	0.152609	0.21519	0	0	0.172753	0.183479	0.163931	0	0	0	0.340434	0.113402	0.166386	0.245656	0.15846	0.154511	0.304173	0	0.194041	0.123591	0	0	0.303071	0	0	0.580241	0	0	0.208483	0.111595	0.139476	0	0	0.20172	0.115059	0.187058	0.0724895	0.284857	0.256008	0.149603	0.18093	0.17529	0	0.18987	0.256277	0.236422
0.20826	0	0	0.04503	0.141515	0.0943267	0	0.000598587	0.200582	0.073915	0.118456	0	0	0	0.307286	0.0072202	0.106589	0.26652	0.145628	0.109191	0.204102	0	0.0886722	0.109052	0	0	0.231177	0	0	0.403708	0	0	0.165912	0.223866	0.269542	0	0	0.228672	0.28749	0.253022	0.216287	0.241659	0.176722	0.118753	0.266739	0.16466	0	0.126	0.271946	0.279832
0.188895	0	0	0.227205	0.130404	0.0268352	0	0.288891	0.105303	0.0223355	0.179842	0	0	0	0.182218	0	0.0824013	0.122545	0.0991998	0.234597	0.16915	0	0.154082	0.184944	0	0	0.148829	0	0	0.266528	0	0	0.181714	0.106554	0.0625291	0	0	0.149064	0.211703	0.108928	0.14176	0.192908	0.0714073	0.276449	0.0922272	0.0828235	0	0.213825	0.155641	0.217402
0.377119	0	0	0.159786	0.147279	0.179018	0	0.159653	0.231813	0.266159	0.240272	0	0	0	0.200598	0	0.236849	0.514883	0.309698	0.294462	0.158559	0	0.287333	0.140706	0	0	0.53482	0	0	0.380602	0	0	0.191446	0.304123	0.26187	0	0	0.317172	0.209947	0.153524	0.174829	0.500334	0.555087	0.225028	0.294269	0.365394	0	0.242219	0.0831685	0.452244
0.2684	0	0	0.183927	0.171175	0.323044	0	0	0.10826	0.179169	0.251359	0	0	0	0.341008	0.202596	0.160362	0.406457	0.411456	0.425287	0.232468	0	0.364228	0.0624358	0	0	0.436006	0	0	0.614529	0	0	0.192069	0.437434	0.26388	0	0	0.33405	0.0993479	0.240723	0.15513	0.322132	0.395144	0.354707	0.444501	0.410711	0	0.295029	0.46795	0.279088
0.461937	0	0	0.255869	0.30606	0.433563	0	0	0.393844	0.31694	0.248433	0	0	0	0.834423	0.498733	0.521717	0.266125	0.347514	0.0327889	0.286327	0	0.466757	0.712174	0	0	0.478044	0	0	0.500856	0	0	0.454622	0.465615	0.471243	0	0	0.521655	0.564469	0.564881	0.126118	0.42578	0.718198	0.510886	0.511774	0.507814	0	0.309691	0.572745	0.13036
0.430199	0	0	0.424834	0.0455412	0.401777	0	0	0.621557	0.417325	0.302855	0	0	0	0.266215	0.552776	0.320934	0.427083	0.488663	0.251167	0.518593	0	0.763233	0.457863	0	0	0.433807	0	0	0.396536	0	0	0.582263	0.310654	0.432034	0	0	0.435259	0.5383	0.479599	0.331406	0.293702	0.370657	0.372583	0.496888	0.472239	0	0.530234	0.69135	0.351766
0.321256	0	0	0.1794	0.262064	0.29356	0	0	0.438785	0.336354	0.340043	0	0	0	0.367816	0.10272	0.254097	0.273522	0.402815	0.403231	0.469512	0	0.41904	0.453202	0	0	0.432244	0	0	0.193744	0	0	0.451693	0.202763	0.331527	0	0	0.452242	0.524786	0.184745	0.243383	0.252197	0.520386	0.38461	0.405297	0.450683	0	0.365092	0.358582	0.236392
0.378042	0	0	0.507677	0.188977	0.306848	0	0	0.588219	0.561578	0.205026	0	0	0	0.298287	0.400318	0.482724	0.398631	0.41395	0.547984	0.867617	0	0.565362	0.602831	0	0	0.323977	0	0	0.453206	0	0	0.480373	0.574257	0.403438	0	0	0.667656	0.651974	0.736769	0.353358	0.429285	0.776021	0.503074	0.820427	0.561676	0	0.366478	0.466686	0.174675
0.407142	0	0	0.121932	0.186935	0.305798	0	0	0.353213	0.194442	0.141629	0	0	0	0.824586	0.145528	0.234958	0.289673	0.44808	0.262192	0.363549	0	0.388654	0.265635	0	0	0.609225	0	0	0.410738	0	0	0.3958	0.67783	0.484068	0	0	0.350782	0.445222	0.609509	0.284378	0.419474	0.503589	0.699486	0.144394	0.613419	0	0.656088	0.432625	0.223054
0.800399	0	0	0.710653	1.05968	0.447559	0	0	0.994957	1.59008	0.341532	0	0	0	1.02136	0.349026	0.842618	0.449788	0.704825	0.418708	0.670829	0	0.935114	0.57171	0	0	0.740874	0	0	0.319712	0	0	0.710116	0.833937	0.847587	0	0	1.20769	1.00263	0.912658	0.335286	0.89919	1.40082	1.69844	0.824578	1.62914	0	0.843272	1.19635	0.516364
0.555326	0	0	1.19301	0.685389	0.555965	0	0	0.64846	1.87048	0.451759	0	0	0	0.455245	1.39496	1.01921	0.748678	1.46175	2.10632	0.904426	0	0.730337	0.796378	0	0	1.10345	0	0	1.17071	0	0	1.07335	1.19974	1.19948	0	0	1.93414	0.904455	1.63802	0.393305	0.426715	1.39234	1.87171	0.932182	2.07677	0	1.24518	2.75553	0.524136
0.411768	0	0	0.771913	0.142241	0.359853	0	0	0.738322	1.01361	0.285782	0	0	0	0.801326	0.567093	0.486628	0.660039	0.920075	0.605732	0.58805	0	0.598421	0.3621	0	0	0.669044	0	0	0.574068	0	0	0.711183	1.28111	0.878029	0	0	0.647767	0.321918	0.706487	0.24946	0.599441	0.813641	1.54872	0.76583	1.37039	0	0.939977	0.998441	0.272532
0.535679	0	0	0.622007	0.845809	0.731634	0	0	0.85024	1.22207	0.360501	0	0	0	1.17928	0.796737	0.595043	0.768536	0.741512	1.24823	0.359787	0	0.883203	0.521848	0	0	0.76483	0	0	0.713372	0	0	1.02217	1.45142	1.38294	0	0	0.535026	0.673624	0.643863	0.225224	0.666345	0.972984	2.05337	0.816532	1.28085	0	1.3244	1.10888	0.534595
0.696765	0	0	0.950072	1.03316	0.618061	0	0	1.31467	1.85728	0.582808	0	0	0	1.3632	1.44561	0.842527	0.592809	0.948326	0.985539	0.793252	0	0.89123	1.09165	0	0	1.1547	0	0	0.593135	0	0	1.67888	0.991322	1.57385	0	0	1.82968	1.13189	1.6	0.567845	1.01904	1.74343	2.10535	1.40035	1.95033	0	0.596465	2.13101	0.600038
1.0974	0	0	0.588986	0.648977	0.504906	0	0	1.24953	1.05005	0.227135	0	0	0	1.07711	1.17235	0.740447	0.0861638	1.35891	1.40807	0.269724	0	1.11092	0.664174	0	0	0.735995	0	0	1.10407	0	0	1.69465	1.1944	0.757234	0	0	1.53335	0.428878	1.57182	0.129742	0.428173	1.16346	1.6142	0.586365	2.06985	0	1.45272	1.32803	0.27257
1.20382	0	0	0.494314	0.731145	0.104884	0	0	1.32684	1.17781	0.163817	0	0	0	0.989087	1.40442	0.904209	0.526891	0.729204	0.73459	0.471663	0	0.683317	0.776826	0	0	0.392964	0	0	1.09366	0	0	0.665872	1.36662	0.561764	0	0	2.01508	0.7103	2.04153	0.300891	1.27369	1.52586	1.47061	0.955157	2.39037	0	1.1242	1.03427	0.381729
0.60848	0	0	0.574338	0.602264	0.613901	0	0	1.05808	1.18712	0.145074	0	0	0	0.851153	1.24423	0.593533	0.302255	1.21536	0.422261	0.515903	0	0.717652	0.545011	0	0	0.785401	0	0	0.748161	0	0	1.25982	0.95935	1.08712	0	0	1.32363	0.694183	1.6609	0.201941	0.682789	1.32834	1.41103	1.19507	1.89792	0	0.924911	2.09083	0.277845
0.508831	0	0	0.361867	1.32282	0.848864	0	0	1.05662	2.40279	0.571125	0	0	0	1.47696	0.885694	0.955597	0.943311	1.0981	1.54554	0.698443	0	1.12497	1.44118	0	0	1.52023	0	0	0.90547	0	0	1.56977	1.02616	1.29187	0	0	1.73224	1.32826	1.18415	0.409264	0.838153	1.23149	2.40055	1.35912	2.10338	0	0.692412	1.73425	0.777757
0.285898	0	0	0.543782	0.249838	0.322989	0	0	0.589659	0.376998	0.231304	0	0	0	0.574911	0.117272	0.646027	0.472896	0.354276	0.336393	0.801743	0	0.4932	0.566976	0	0	0.613687	0	0	0.279045	0	0	0.4528	0.41784	0.368574	0	0	0.473642	0.696286	0.310641	0.358642	0.635365	0.44399	0.711517	0.185124	0.623404	0	0.341415	0.302161	0.432867
0.660552	0	0	0.78358	0.393428	0.483164	0	0	1.36945	0.702111	0.428862	0	0	0	1.30661	2.44566	0.474212	0.787208	1.20063	1.22093	0.840458	0	0.784841	0.724862	0	0	0.871571	0	0	1.89215	0	0	0.776947	1.03022	0.647428	0	0	1.60821	0.847643	2.13917	0.252537	1.21464	0.452021	0.847897	0.445655	2.41188	0	1.20694	1.39965	0.802405
0.631489	0	0	0.76666	0.799385	0.56869	0	0	1.62168	0.846348	0.297505	0	0	0	0.569679	1.96806	0.742118	0.283737	1.55668	0.756068	0.620486	0	0.686133	0.717963	0	0	0.701243	0	0	1.35635	0	0	0.93591	1.12454	0.733824	0	0	1.5305	0.696503	2.25956	0.426074	0.941304	1.22134	1.23435	0.653324	1.60795	0	1.23809	2.14089	0.237106
1.16219	0	0	1.09786	0.864273	0.984443	0	0	3.08288	1.05685	0.355983	0	0	0	1.2234	4.00462	1.19856	0.868064	2.34978	1.25067	1.56813	0	0.672913	0.918095	0	0	1.48471	0	0	2.09656	0	0	1.67525	1.40392	1.74145	0	0	2.39891	1.29746	4.31558	0.554037	1.27288	0.940964	0.802495	0.390185	3.00501	0	2.11806	3.0975	0.650275
1.22817	0	0	0.978095	0.594729	0.536813	0	0	1.43337	1.15709	0.30726	0	0	0	0.626684	2.60357	0.698103	0.637125	1.48412	1.70022	0.803866	0	0.933751	0.831871	0	0	0.561029	0	0	2.02458	0	0	0.504079	1.57771	0.621489	0	0	2.17243	0.645815	2.79069	0.281742	1.09177	1.09396	1.13938	0.877202	2.65616	0	1.29679	2.00066	0.373163
0.928258	0	0	0.568277	1.02158	0.72828	0	0	1.10173	1.7856	0.194005	0	0	0	1.35264	1.41245	0.852111	0.619971	1.40001	0.983205	0.49305	0	1.01491	1.1428	0	0	0.748052	0	0	0.980084	0	0	1.84501	1.24625	1.28899	0	0	1.76039	0.784077	1.64403	0.231583	0.612303	1.7007	2.05306	1.16823	1.87982	0	1.26344	2.15098	0.565036
0.730834	0	0	0.303127	0.809603	0.610325	0	0	1.22608	1.07707	0.0226303	0	0	0	1.24834	0.763154	0.999252	0.364025	1.13251	1.53123	0.364603	0	0.655305	0.763086	0	0	0.589456	0	0	0.660325	0	0	1.17666	1.22257	0.777153	0	0	1.76007	0.541597	1.39521	0.284086	0.663233	1.17916	1.87045	0.7488	2.11908	0	1.01008	1.15983	0.575673
0.878901	0	0	0.745748	0.948774	0.62872	0	0	1.73149	1.8221	0.344113	0	0	0	1.39168	0.965557	1.31303	0.269116	1.05041	0.124033	0.990462	0	0.568033	1.33617	0	0	0.600522	0	0	0.286882	0	0	1.5404	1.03454	1.2412	0	0	2.66799	0.948092	2.41505	0.428443	0.750471	1.37976	1.88916	1.24394	1.94417	0	0.874336	1.27659	0.490405
0.810238	0	0	0.859687	0.754853	0.738746	0	0	1.27465	0.705621	0.437767	0	0	0	0.803036	1.36582	1.22216	0.956329	0.845071	0.892752	1.15469	0	0.564997	1.00156	0	0	1.10513	0	0	0.701137	0	0	0.520285	1.05468	0.847009	0	0	1.14382	0.840626	1.40641	0.217757	0.973871	1.04463	1.12365	0.903466	1.73724	0	0.692497	1.10163	0.378934
0.654042	0	0	0.466535	0.66897	0.343944	0	0	1.22637	1.05813	0.186367	0	0	0	0.591081	1.9111	0.425408	0.56099	1.11074	0.885831	0.776952	0	0.83271	0.616833	0	0	0.778869	0	0	1.31028	0	0	0.861216	1.23851	0.868351	0	0	1.11597	0.68144	1.96009	0.0965983	0.685882	0.94408	1.14483	0.911742	1.77483	0	1.24085	1.80982	0.174711
0.635889	0	0	0.711943	0.917377	0.533809	0	0	1.03037	1.04647	0.258426	0	0	0	1.17527	1.83538	0.312015	0.567347	0.861357	0.377868	0.602944	0	1.10202	0.768406	0	0	0.33427	0	0	1.4137	0	0	0.591824	1.4861	0.889559	0	0	1.00139	0.639904	1.82936	0.146924	0.941885	1.08274	1.87426	1.01987	1.59698	0	0.888706	1.60576	0.162008
0.351065	0	0	0.665236	0.789682	0.518092	0	0	1.26597	0.844569	0.362733	0	0	0	0.880721	1.99654	0.384601	0.22051	0.732971	1.11919	0.966568	0	0.719988	0.577098	0	0	0.712048	0	0	1.54062	0	0	0.505974	1.40106	1.01394	0	0	0.638849	0.891624	1.57093	0.423584	0.745263	1.15949	1.52397	0.593944	0.919938	0	0.952665	1.69126	0.441624
1.29593	0	0	1.64804	1.28214	0.836627	0	0	1.58793	1.7455	0.462743	0	0	0	1.77847	2.25685	1.35601	1.10024	0.958122	0	1.36474	0	1.37906	1.35276	0	0	0.743597	0	0	1.56503	0	0	0.473725	1.6499	1.9444	0	0.0164553	1.3758	0.91675	2.53412	0.562882	1.19952	1.12088	1.59077	1.13609	2.24057	0	1.2344	2.17739	1.31452
1.8245	0	0	1.05264	1.96498	1.13596	0	0	1.5906	0.731395	0.590241	0	0	0	1.66151	5.49831	1.02258	0.491402	1.53328	0.449102	1.07777	0	2.23102	1.88461	0	0	0.656177	0	0	4.30008	0	0	0.281617	2.45296	1.3497	0	0	1.59734	0.503978	3.87718	0.510009	1.36338	1.49955	2.29142	2.04858	2.30406	0	2.07894	3.20173	0.858059
1.09045	0	0	0.35213	0.547097	0.317107	0	0	1.31598	0.850026	0.255256	0	0	0	0.54951	1.87718	0.686926	0.133443	1.72193	2.01986	0.673187	0	0.781502	0.57827	0	0	0.555779	0	0	1.82222	0	0	1.46001	1.36857	0.709415	0	0	1.81915	0.541295	2.3262	0.149475	0.716077	1.30083	1.40114	0.754097	2.3889	0	1.88802	1.86101	0.564334
0.741103	0	0	0.8103	0.534691	0.439744	0	0	1.45826	1.15572	0.276483	0	0	0	0.470522	1.79794	0.781898	0.284671	1.51839	0.76525	0.756841	0	0.56482	0.534921	0	0	0.757339	0	0	1.16598	0	0	1.10406	1.02948	0.828959	0	0	1.72733	0.715967	2.3429	0.428351	0.641414	1.30503	1.20787	0.585763	1.65755	0	1.12706	2.44901	0.362973
1.34551	0	0	0.574985	0.478996	0.454193	0	0	1.29421	1.5805	0.14518	0	0	0	1.3064	1.41148	1.05231	0.304929	1.35786	2.07892	0.831508	0	0.578174	0.776878	0	0	0.939325	0	0	1.13129	0	0	1.91611	1.13498	0.673623	0	0	2.48179	0.735672	2.16579	0.365067	0.68173	1.54935	1.52952	0.810223	2.46099	0	1.56625	2.00975	0.339791
1.45807	0	0	0.86174	0.53611	0.753646	0	0	2.31232	1.70516	0.409077	0	0	0	0.898205	3.57808	1.38244	1.00168	1.65132	1.05988	1.03711	0	0.840909	0.848179	0	0	0.912279	0	0	2.28122	0	0	1.12464	1.68538	1.71537	0	0	1.93138	1.09692	4.17838	0.409238	1.66185	0.510644	0.737541	1.60501	3.2842	0	2.22153	2.08734	0.999053
1.01374	0	0	0.43391	1.25725	0.207369	0	0	1.25643	1.31014	0.467871	0	0	0	0.408364	1.58541	0.846447	0.861673	0.762103	0.920828	0.643493	0	0.699073	0.980116	0	0	1.13364	0	0	1.0092	0	0	1.29776	1.07476	1.12867	0	0	1.67894	1.21973	1.30362	0.269079	1.24919	2.15021	1.26655	1.4586	2.29282	0	0.517444	2.49639	0.650021
0.351648	0	0	0.348777	0.293749	0.453663	0	0	0.748508	0.338236	0.359484	0	0	0	0.484375	0.603328	0.483357	0.368485	0.477057	0.44472	0.640762	0	0.466525	0.173528	0	0	0.561984	0	0	0.569306	0	0	0.473024	0.627181	0.519674	0	0	0.628149	0.627053	0.851395	0.244298	0.655765	0.595947	0.665372	0.594192	1.13589	0	0.571377	0.513551	0.262944
0.823738	0	0	0.518991	0.654355	0.629044	0	0	1.58258	0.79515	0.361047	0	0	0	0.707379	2.08742	0.552237	0.197234	1.35512	0.88579	0.767262	0	0.811934	0.785184	0	0	0.672439	0	0	1.43317	0	0	1.01327	1.27732	0.853539	0	0	1.51703	0.577842	2.36114	0.314269	0.607181	0.807751	1.40891	0.734135	1.62089	0	1.18312	1.82916	0.298917
0.448715	0	0	0.353818	0.542741	0.600851	0	0	0.482524	0.397426	0.473356	0	0	0	0.920484	0.528934	0.317839	0.562629	0.67516	0.422752	0.80671	0	0.345716	0.461848	0	0	0.813929	0	0	0.592904	0	0	0.75469	0.446678	0.674153	0	0	0.573424	1.03588	0.676734	0.549762	0.880467	0.727851	0.884131	0.695097	0.857187	0	0.855796	0.543155	0.434994
0.927658	0	0	1.19879	1.06003	0.768949	0	0	2.56648	0.823672	0.553971	0	0	0	0.947954	4.34765	1.00906	0.536508	1.70781	1.29596	1.78533	0	0.876578	1.34293	0	0	1.08926	0	0	3.14407	0	0	0.806653	1.59496	1.38532	0	0	1.54872	1.36189	3.46972	0.760716	1.63334	1.31101	1.32228	0.614999	2.05731	0	2.03574	3.43967	0.840857
0.932079	0	0	1.0351	0.85519	0.750028	0	0	2.17759	1.88706	0.559602	0	0	0	1.07071	3.72441	1.02871	1.18743	1.2307	0.0047098	0.979122	0	0.751354	1.1228	0	0	1.51504	0	0	1.73696	0	0	0.426016	0.838968	1.94132	0	0	1.50818	1.20101	3.22566	0.616973	0.898131	0.45328	0.640552	1.22476	1.96946	0	0.714	1.83171	0.839929
1.18209	0	0	0.967764	0.981572	0.765593	0	0	2.0385	0.530346	0.301144	0	0	0	0.997592	4.09876	0.813196	0.46101	1.65586	1.2043	0.997969	0	1.0732	1.09491	0	0	0.658389	0	0	3.0224	0	0	0.527173	2.20614	0.935043	0	0	2.12654	0.848465	3.72377	0.502937	1.70485	1.29456	1.36375	0.707536	2.77596	0	2.08844	2.36775	0.651574
1.37897	0	0	0.532935	0.615832	0.397028	0	0	1.73011	1.87071	0.127686	0	0	0	1.49636	1.26114	0.833522	0.471763	1.41069	0.701674	0.775564	0	0.74354	0.857072	0	0	0.810152	0	0	0.691202	0	0	2.0952	1.31025	1.3906	0	0	2.17031	1.01987	2.50238	0.272878	0.613791	1.1975	1.58086	1.09476	2.55309	0	1.60836	1.31134	0.320199
0.62753	0	0	0.351664	0.488577	0.718615	0	0	0.507135	0.705914	0.298374	0	0	0	1.1152	0.276754	0.722801	0.433762	0.641755	0.317829	0.329781	0	0.737323	0.583565	0	0	0.44309	0	0	0.594037	0	0	0.515337	1.24733	0.84902	0	0	0.538896	0.354689	0.626506	0.050627	0.752748	0.446644	1.12967	0.207698	0.971154	0	0.891291	0.80993	0.890852
1.34375	0	0	0.313204	0.809516	0.620498	0	0	1.74638	1.01018	0.129975	0	0	0	1.34917	2.16682	0.876706	0.374466	1.71473	1.48345	0.616283	0	0.935981	0.887432	0	0	0.802982	0	0	1.53571	0	0	1.82284	1.38642	1.00505	0	0	2.02709	0.750992	2.28219	0.115966	0.590363	1.35754	1.74107	0.604305	2.38141	0	1.27408	1.54433	0.529651
0.99728	0	0	0.261259	0.668439	0.497611	0	0	0.973029	0.798375	0.117449	0	0	0	0.695761	0.797843	0.803169	0.265749	1.13315	1.7995	0.568178	0	0.557357	0.466195	0	0	0.623866	0	0	1.1002	0	0	1.3217	1.19032	0.454567	0	0	1.66583	0.356308	1.14551	0.222521	0.525707	1.33884	1.55584	0.942098	1.78158	0	1.18423	1.41771	0.264152
1.15083	0	0	0.422272	1.04885	0.87629	0	0	1.6238	0.818746	0.135863	0	0	0	1.759	1.24546	1.13035	0.681369	1.3058	1.16028	1.06525	0	0.904061	0.867106	0	0	1.15935	0	0	0.985985	0	0	1.88277	1.45467	1.21627	0	0	1.38648	0.921558	1.66648	0.188381	0.572263	1.09969	1.87079	0.136598	2.01223	0	1.41171	0.899322	0.640318
0.384213	0	0	0.219458	0.259236	0.186377	0	0	0.276648	0.29117	0.194955	0	0	0	0.926808	1.49487	0.179336	0.515222	0.128067	0.0156902	0.224195	0	0.381118	0.236585	0	0	0.443267	0	0	1.22662	0	0	0.321388	0.457268	0.286298	0	0	0.14786	0.149247	0.752796	0.267839	0.531833	0.337625	0.0364023	0.424239	0.241455	0	0.170078	0.418043	0.224742
0.206662	0	0	0.13684	0.25421	0.20961	0	0.00223485	0.165872	0.227261	0.11245	0	0	0	0.456092	0.0108487	0.0349261	0.180284	0.157346	0.0336303	0.223301	0	0.127857	0.106508	0	0	0.189838	0	0	0.522926	0	0	0.127112	0.252424	0.158743	0	0	0.151847	0.181378	0.217978	0.0813907	0.206398	0.15522	0.164907	0.35716	0.143983	0	0.222186	0.305214	0.227484
0.161725	0	0	0.141104	0.141083	0.0772813	0	0.0878543	0.0958591	0.130092	0.109113	0	0	0	0.301735	0	0.107151	0.272971	0.0995881	0.0514224	0.0559991	0	0.11998	0.091669	0	0	0.125094	0	0	0.294522	0	0	0.122518	0.130416	0.220479	0	0	0.142547	0.120273	0.210428	0.0838396	0.222383	0.151769	0.13619	0.203791	0.118939	0	0.193937	0.178209	0.188717
0.125355	0	0	0.253241	0.0857419	0.118586	0	0.221292	0.147717	0.0544548	0.134565	0	0	0	0.241462	0	0.141979	0.131172	0.0667914	0.0876707	0.14058	0	0.337658	0.18876	0	0	0.141894	0	0	0.278501	0	0	0.174639	0.124915	0.0675393	0	0	0.147864	0.0269585	0.138552	0.174958	0.132589	0.044335	0.267561	0.133892	0.0990813	0	0.165974	0.1156	0.185305
0.599349	0	0	0.265666	0.27349	0.332782	0	0	0.283402	0.220915	0.160421	0	0	0	0.392217	0.293192	0.177228	0.458718	0.220798	0.414603	0.171191	0	0.440481	0.194795	0	0	0.42726	0	0	0.617653	0	0	0.289351	0.471074	0.477211	0	0	0.421317	0.308879	0.304262	0.233881	0.264502	0.6109	0.318966	0.402202	0.487565	0	0.263442	0.176143	0.466795
0.463851	0	0	0.167995	0.267027	0.252504	0	0	0.491252	0.446446	0.477294	0	0	0	0.474259	0.347553	0.254202	0.471305	0.274563	0.421464	0.527052	0	0.0935694	0.392631	0	0	0.339982	0	0	0.525974	0	0	0.273136	0.399966	0.42001	0	0	0.341721	0.512965	0.278914	0.0834599	0.474002	0.567854	0.239147	0.507941	0.454474	0	0.333014	0.383736	0.440206
0.415635	0	0	0.302387	0.267953	0.510648	0	0	0.577925	0.337876	0.411844	0	0	0	0.710305	0.55958	0.230178	0.480399	0.627967	0.541905	0.539303	0	0.765001	0.420756	0	0	0.465665	0	0	0.778714	0	0	0.737847	0.612272	0.422127	0	0	0.497162	0.609007	0.289852	0.0442107	0.422456	0.374081	0.697598	0.499514	0.752059	0	0.550403	0.513771	0.370828
0.471358	0	0	0.501273	0.261823	0.661949	0	0	0.975229	0.61504	0.343899	0	0	0	0.619905	1.20474	0.84126	0.435873	0.499187	0	0.905448	0	0.539235	0.928383	0	0	0.547219	0	0	0.492171	0	0	0.596021	0.560657	0.503508	0	0.307234	0.812695	1.01276	1.08738	0.330665	0.760624	0.888645	0.541426	0.802224	0.912202	0	0.554264	0.709751	0.376618
0.155463	0	0	0.255975	0.151649	0.328124	0	0	0.42555	0.333686	0.306012	0	0	0	0.308422	0.0875978	0.352678	0.168978	0.351274	0.401245	0.462519	0	0.669313	0.33521	0	0	0.292966	0	0	0.349563	0	0	0.293956	0.465222	0.322051	0	0	0.382773	0.382217	0.370862	0.232405	0.21128	0.496009	0.501691	0.502519	0.565695	0	0.403505	0.412845	0.241946
0.378809	0	0	1.28198	0.344701	0.140081	0	0	0.88843	0.208204	0.517535	0	0	0	0.410621	0.945038	0.55206	0.62719	0.48378	1.15602	1.18924	0	0.626898	0.460383	0	0	0.815466	0	0	1.44533	0	0	0.470232	1.132	0.935175	0	0	0.380521	0.660275	1.43654	0.55253	0.921961	0.765588	0.809115	0.576613	0.36208	0	0.626746	0.684243	0.62904
0.206022	0	0	0.296664	0.250253	0.313117	0	0	0.454622	0.499801	0.413025	0	0	0	0.687877	0.39959	0.323093	0.50848	0.576639	0.917835	0.267291	0	0.330434	0.517691	0	0	0.616778	0	0	0.611454	0	0	0.723144	0.595793	0.530219	0	0	0.456431	0.676513	0.410253	0.0832851	0.339252	0.47864	0.896651	0.47042	0.881137	0	0.734247	0.803681	0.286434
0.605316	0	0	0.646544	1.05649	0.792599	0	0	1.0687	2.10685	0.416233	0	0	0	1.21276	1.28799	0.694444	0.672207	1.03921	0.901635	0.176651	0	0.955999	0.812715	0	0	1.0551	0	0	0.921276	0	0	1.39141	1.09834	0.813973	0	0	1.1722	0.790625	1.41304	0.321575	0.577446	1.3087	2.03633	1.39034	1.83685	0	1.27563	1.73137	0.3277
1.45365	0	0	1.53505	1.2837	1.51043	0	0	2.95038	0.558493	0.500936	0	0	0	1.62687	6.7215	0.315648	1.12333	1.646	0.551128	1.36714	0	1.80117	1.81686	0	0	2.24923	0	0	4.3422	0	0	0.858836	1.90842	1.79153	0	0	1.26596	1.58582	4.43833	0.608393	1.70914	0.979219	1.29045	0.786237	2.80788	0	1.72779	3.11369	1.2448
0.894014	0	0	0.589881	0.900204	0.714052	0	0	1.32009	1.81699	0.431936	0	0	0	0.736453	1.47486	0.881962	0.747276	1.15869	0.793016	0.928562	0	0.487725	0.997569	0	0	0.985808	0	0	0.550006	0	0	1.75692	1.17495	1.55364	0	0	1.69068	1.07201	1.92524	0.345711	0.94189	1.40803	1.34562	1.39402	1.79828	0	0.687785	2.33951	0.19597
1.08559	0	0	0.348081	1.05966	0.59136	0	0	1.85292	1.23399	0.26966	0	0	0	0.955321	1.44002	1.17328	0.660675	1.69596	1.23541	0.704414	0	0.83153	1.10863	0	0	1.14886	0	0	0.747166	0	0	1.49479	1.24107	1.29466	0	0	2.49677	0.966563	1.89461	0.296868	0.756705	1.39203	1.68566	0.769885	2.50861	0	0.753473	1.56003	0.632156
0.700708	0	0	0.883189	0.570998	0.51771	0	0	2.09558	1.52863	0.41597	0	0	0	1.15285	2.1087	0.942644	0.529465	1.07479	0.123346	1.30157	0	0.21066	0.827299	0	0	0.728595	0	0	0.728063	0	0	1.28994	1.08939	1.23339	0	0	2.09763	1.14062	3.23674	0.370435	1.34786	0.956636	0.736659	0.745348	2.17621	0	0.94304	1.98238	0.282679
0.964137	0	0	1.01504	0.706281	0.867414	0	0	2.37991	1.24473	0.246158	0	0	0	0.925553	3.13382	0.924171	0.239981	1.89682	0.938062	1.12546	0	0.720742	1.12829	0	0	0.966288	0	0	1.86705	0	0	0.933395	1.52932	1.15699	0	0	2.36398	0.665728	3.7013	0.693357	0.93145	0.854883	1.34286	0.741625	2.34077	0	1.6723	2.68026	0.425759
1.2343	0	0	1.03952	0.822086	0.563848	0	0	1.48698	2.00066	0.270085	0	0	0	0.985972	2.4322	1.20838	0.270414	2.11793	1.36347	0.45841	0	1.31049	1.12719	0	0	0.6131	0	0	2.23928	0	0	1.29957	1.82347	0.685671	0	0	2.85047	0.539398	3.29023	0.445786	1.03478	1.9911	2.03437	1.42131	3.01591	0	2.07354	2.44029	0.497875
1.09213	0	0	0.00656103	0.867816	0.272769	0	0	1.337	0.626689	0.362162	0	0	0	0.899372	0.831746	0.864383	0.605847	0.533162	0.0438254	0.74098	0	0.396739	0.59952	0	0	0.841673	0	0	0.391495	0	0	0.769517	0.96253	0.748177	0	0	1.03241	0.78319	1.09956	0.160971	1.16322	0.971266	1.04304	0.478941	1.32609	0	0.254505	0.545914	0.397995
1.05869	0	0	0.918833	0.888459	0.750112	0	0	1.75514	2.1554	0.142004	0	0	0	1.04395	1.74738	0.81978	0.234354	1.81435	1.17993	0.7691	0	0.658648	1.02278	0	0	0.604963	0	0	1.1144	0	0	1.36793	1.08033	0.819891	0	0	2.37457	0.905687	2.58414	0.527935	0.6317	1.26426	2.08895	1.00882	2.27111	0	1.32104	2.06611	0.403864
0.210189	0	0	0.43372	0.18653	0.335417	0	0	0.431523	0.360445	0.446051	0	0	0	0.476434	0.285595	0.360015	0.346748	0.395327	0.394903	0.634114	0	0.47436	0.389404	0	0	0.387988	0	0	0.418125	0	0	0.323218	0.421385	0.373713	0	0	0.330695	0.380323	0.304537	0.301793	0.303454	0.430952	0.472177	0.466109	0.622486	0	0.137365	0.426555	0.371053
0.94099	0	0	0.699216	0.751271	0.363942	0	0	1.62947	0.558691	0.409553	0	0	0	1.10706	2.38873	0.555426	1.14791	0.604176	0.412324	0.536858	0	0.672119	0.807423	0	0	0.885299	0	0	1.46341	0	0	0.369378	0.818012	1.38733	0	0	1.01294	1.28224	1.64662	0.623196	1.38872	0.886157	0.434653	0.857257	2.03062	0	0.642342	1.32083	1.38169
0.892953	0	0	1.00134	0.797152	1.00655	0	0	3.30622	0.999618	0.42828	0	0	0	1.25646	4.41906	0.919286	0.840366	1.64088	0.232387	1.53648	0	0.823558	1.15486	0	0	1.5605	0	0	2.2663	0	0	1.06294	1.31723	1.85923	0	0	1.47663	1.50714	4.06276	0.529142	1.52737	0.579335	0.699298	0.873924	2.5247	0	1.68093	2.70176	0.730122
0.817859	0	0	0.796257	0.739082	0.593269	0	0	1.64522	0.841504	0.36756	0	0	0	0.773211	3.09284	0.533518	0.276192	1.32146	1.17999	0.79228	0	1.01822	0.885161	0	0	0.552247	0	0	2.39333	0	0	0.660211	1.61151	0.762757	0	0	1.33923	0.494041	2.82848	0.485178	1.10753	0.953644	1.16473	0.77074	1.87822	0	1.7188	2.19992	0.429146
1.01164	0	0	1.54963	0.446575	0.829221	0	0	1.6331	1.65719	0.407114	0	0	0	1.09322	3.20468	0.934551	0.611353	1.49252	0.571198	0.564438	0	0.76059	1.01848	0	0	0.63063	0	0	1.72582	0	0	0.345044	1.38947	1.2496	0	0	1.74836	0.621847	3.45757	0.525483	1.33768	0.460355	0.738096	1.27798	2.56723	0	1.31943	2.17425	0.742064
0.582601	0	0	0.806479	0.760572	0.382196	0	0	0.865684	1.76108	0	0	0	0	1.18916	1.41946	0.620181	0.312025	1.2968	1.3065	0.491641	0	0.973157	0.865018	0	0	0.701935	0	0	0.996426	0	0	1.64493	1.02746	1.01285	0	0	1.40234	0.780408	1.60206	0.277943	0.385097	1.13199	1.79951	0.761155	1.82635	0	1.2417	1.68387	0.649682
0.99553	0	0	0.703766	0.790215	0.688632	0	0	1.68428	1.40756	0.298929	0	0	0	0.834302	2.30049	0.850539	0.395709	1.98404	1.43633	0.633201	0	0.782767	1.11361	0	0	0.576671	0	0	1.71911	0	0	1.002	1.53725	0.840456	0	0	2.20613	0.519121	2.75797	0.323618	0.604322	1.60272	1.97301	1.07945	2.38008	0	1.42904	2.16001	0.35443
0.690002	0	0	0.825084	0.776879	0.673132	0	0	1.63762	1.38782	0.49205	0	0	0	1.19018	2.07339	1.18473	0.397037	1.44633	0.0369084	0.849936	0	0.808047	0.962138	0	0	0.892789	0	0	0.87725	0	0	1.12676	1.46651	1.47818	0	0	1.92411	0.703879	2.85235	0.463118	0.857377	1.05943	1.14279	1.27988	1.88857	0	0.9916	2.06698	0.284243
0.876524	0	0	0.412774	0.728426	0.63504	0	0	1.02599	0.786749	0.615729	0	0	0	1.09541	1.1176	0.712714	0.1451	0.952667	0.34532	0.622654	0	0.976891	0.783094	0	0	1.04403	0	0	1.11283	0	0	0.739325	1.35082	0.552645	0	0	0.943728	0.707052	1.37044	0.490835	0.789496	1.0353	1.7965	0.98	1.34139	0	1.15872	1.198	0.320241
0.374919	0	0	0.389842	0.513873	0.448061	0	0	0.987151	0.850481	0.211666	0	0	0	0.791135	1.07712	0.52295	0.432967	0.741939	0.275016	0.767238	0	0.693237	0.504084	0	0	0.554235	0	0	0.846902	0	0	0.569513	0.905927	0.946295	0	0	0.583437	0.720533	1.15334	0.177094	0.883468	0.809231	0.959757	0.298649	1.09791	0	0.801729	1.13053	0.148248
0.845856	0	0	0.862526	0.567426	0.430623	0	0	1.86827	1.15396	0.193049	0	0	0	1.45022	1.89994	0.897842	0.49614	0.471265	0	1.2976	0	0.365013	1.00315	0	0	0.637472	0	0	0.736347	0	0	1.00145	0.920256	0.971485	0	0.625179	1.52626	1.02981	2.37247	0.432605	1.10912	0.946717	1.07921	0.556632	1.48162	0	0.299648	1.0616	0.328229
0.479654	0	0	0.873836	0.250716	0.460022	0	0	0.868498	0.641797	0.660384	0	0	0	0.449136	1.95073	0.551237	0.435796	0.660349	0.908393	0.62764	0	0.698434	0.830311	0	0	0.940021	0	0	1.61283	0	0	0.434271	1.17385	0.810611	0	0	0.696699	0.667126	1.6191	0.492449	0.712151	1.21227	0.90866	0.924373	0.929752	0	0.855977	1.83171	0.561665
0.495371	0	0	0.741642	0.630457	0.474504	0	0	0.906245	1.07561	0.251584	0	0	0	1.00846	0.898994	0.641748	0.414946	0.44778	0.0393964	0.467403	0	0.496372	0.563682	0	0	0.448618	0	0	0.573589	0	0	0.479362	0.687726	0.519231	0	0	0.676661	0.362511	1.15113	0.128048	0.75038	0.746862	1.10215	0.525275	1.34632	0	0.465367	0.957335	0.327231
0.418209	0	0	0.627748	0.48544	0.432427	0	0	0.773683	1.01689	0.134407	0	0	0	1.00048	1.4515	0.696413	0.545852	0.619941	0.0328961	0.60274	0	0.485417	0.523944	0	0	0.496632	0	0	0.890004	0	0	0.469562	0.836518	0.945512	0	0	1.10124	0.573298	1.63705	0.258076	0.609281	1.01307	0.890466	0.630068	1.53924	0	0.439143	1.07666	0.458543
1.27779	0	0	0.644122	0.894665	0.984665	0	0	1.56883	0.582777	0.355771	0	0	0	1.19922	4.28777	0.305625	0.729287	1.50492	1.05737	0.509326	0	1.31578	0.801517	0	0	1.2565	0	0	3.18205	0	0	0.800967	1.70571	1.20067	0	0	1.09233	0.748225	3.01446	0.524499	1.24159	0.803383	1.13957	1.34149	2.2714	0	2.20041	2.17863	0.719896
0.539807	0	0	0.942821	0.593315	0.722058	0	0	2.54143	1.3832	0.331073	0	0	0	1.14586	2.54155	1.08295	0.829583	1.40963	0	1.60365	0	0.204981	0.895283	0	0	1.09252	0	0	0.853231	0	0	1.01283	1.32419	1.76357	0	0.415881	1.95561	1.41261	3.61662	0.415332	1.44011	0.645121	0.47728	0.543537	2.19688	0	1.39783	2.11194	0.412144
1.18311	0	0	0.674682	0.561495	0.554715	0	0	1.79042	1.8025	0.131974	0	0	0	1.22773	1.63116	1.20145	0.510692	1.4816	1.22535	1.08411	0	0.574449	0.778666	0	0	0.864234	0	0	0.903861	0	0	1.89743	1.32701	1.15096	0	0	2.54447	1.0523	2.9477	0.370563	1.10317	1.32207	1.33126	1.15336	2.51534	0	1.55435	2.24199	0.270992
0.878976	0	0	0.517538	0.314325	0.621312	0	0	1.76499	1.32508	0.36396	0	0	0	0.952387	2.20155	0.78476	0.666496	1.26193	0.800715	0.831388	0	0.682443	0.565165	0	0	1.00941	0	0	1.42028	0	0	1.27432	0.950587	1.19249	0	0	1.05631	0.880134	2.64401	0.290452	1.08771	0.244404	0.629965	0.939765	1.90919	0	1.66992	1.26681	0.535074
1.10369	0	0	0.640512	1.10595	0.492906	0	0	1.07307	1.62447	0.238505	0	0	0	1.35371	2.45108	0.772367	0.439431	1.38326	1.79331	0.382313	0	1.24879	1.17906	0	0	0.794796	0	0	2.19404	0	0	1.4682	1.50117	0.554399	0	0	1.70814	0.518368	1.77866	0.477929	0.582047	1.8629	2.21669	1.0089	2.00587	0	1.44977	2.14987	0.650232
0.556025	0	0	0.567728	0.41269	0.497339	0	0	0.363437	0.565664	0.567184	0	0	0	0.616135	1.24163	0.0997317	0.581296	0.697123	0.763953	0.47208	0	0.98941	0.648955	0	0	0.458989	0	0	0.997668	0	0	0.475139	1.25036	0.857352	0	0	0.418351	0.531354	0.775629	0.176401	0.532608	0.672109	1.18555	1.14969	0.89726	0	0.874507	0.663793	0.416179
1.14533	0	0	1.89708	1.04324	1.41977	0	0	3.00667	0.224365	0.386639	0	0	0	1.68233	6.45982	0.629368	0.928496	1.84844	0.623149	1.7	0	2.10082	2.18838	0	0	1.88868	0	0	4.50368	0	0	0.668045	2.02238	1.6524	0	0	1.03008	1.40401	4.37357	0.661782	1.97593	0.766688	1.46501	0.768401	2.77635	0	1.88883	3.55708	1.24869
0.604043	0	0	0.535503	0.404067	0.518303	0	0	0.685242	0.491054	0.106163	0	0	0	0.57222	0.808756	0.784109	0.178148	0.67458	0.0299099	0.796537	0	0.542512	0.793596	0	0	0.892703	0	0	0.614902	0	0	0.585267	0.520952	0.523548	0	0	0.728951	0.976718	0.916093	0.808733	0.458184	0.956351	0.850169	0.90953	0.930453	0	0.680433	0.957686	0.726537
0.48681	0	0	0.931374	1.05034	0.64203	0	0	2.43028	0.939318	0.679935	0	0	0	0.862488	3.96276	0.998894	1.10044	1.17044	0.115746	1.68329	0	0.329433	0.957803	0	0	1.62496	0	0	2.0461	0	0	0.744115	0.995083	1.89966	0	0	1.19351	1.68457	3.14735	0.67412	1.57122	0.894876	0.393361	0.569222	1.70427	0	1.00229	2.57848	0.736296
2.19211	0	0	0.968123	1.34389	0.869295	0	0	2.31259	1.7078	1.09827	0	0	0	1.38309	5.60253	0.581418	2.26882	2.34806	2.30375	0.555551	0	0.93569	0.967418	0	0	2.22284	0	0	4.31559	0	0	1.21668	1.9674	1.72277	0	0	2.18186	1.47043	2.91529	0.987273	2.81683	2.38749	0.360155	1.16211	2.75407	0	1.46653	1.01462	2.00991
0.931821	0	0	0.599948	0.629468	0.877072	0	0	1.35702	0.424773	0.471547	0	0	0	0.822448	3.52591	0.244966	0.379488	1.47777	1.21366	0.753012	0	1.02509	0.958972	0	0	0.882597	0	0	2.80625	0	0	0.628761	1.67961	0.847973	0	0	1.07023	0.607264	2.70733	0.260621	1.04931	0.804149	1.15552	0.706082	1.84584	0	1.62333	2.03984	0.48135
1.54319	0	0	0.231356	0.570191	0.600301	0	0	1.67211	1.07556	0.27228	0	0	0	1.69716	1.73442	1.05752	0.331309	1.51141	0.749581	0.920734	0	0.739988	0.98657	0	0	0.814652	0	0	1.38593	0	0	1.74811	1.61769	0.949036	0	0	2.27373	0.641487	2.78079	0.132317	0.870534	1.08395	1.59472	1.15679	2.66547	0	1.82255	0.75002	0.413195
0.492625	0	0	0.47189	0.492677	0.578015	0	0	0.817512	0.94918	0.208884	0	0	0	0.806079	0.75693	0.474433	0.798907	0.707386	0.956251	0.183033	0	0.614788	0.208307	0	0	0.748111	0	0	0.653468	0	0	0.797307	1.17764	0.932378	0	0	0.824577	0.439983	0.596592	0.173475	0.976831	0.852145	0.980732	0.471313	1.10773	0	0.845009	0.949729	0.790886
0.895292	0	0	0.382469	0.758486	0.391113	0	0	0.90749	1.04433	0.332208	0	0	0	0.863029	1.03563	0.67081	0.388965	0.898652	1.76932	0.413716	0	0.729794	0.785062	0	0	0.948724	0	0	0.849183	0	0	1.67283	0.896658	0.780617	0	0	1.56227	0.655264	1.18638	0.136486	0.547363	1.10513	1.46709	0.422567	1.57809	0	0.872118	1.37522	0.489607
0.851079	0	0	0.689245	0.813921	0.473534	0	0	1.79955	1.1498	0.363944	0	0	0	0.945507	2.15027	1.16294	0.2605	1.37722	1.54683	1.17685	0	0.722714	0.83792	0	0	0.90233	0	0	1.69538	0	0	1.11449	1.4681	0.731579	0	0	1.99131	0.678459	2.57018	0.352722	0.957529	1.48078	1.79421	0.493116	2.43534	0	1.8046	2.01935	0.541004
1.15306	0	0	0.646901	1.99827	0.777866	0	0	1.03484	1.96071	0.442494	0	0	0	1.48764	2.7144	1.05626	0.945035	1.70776	1.5802	0.891751	0	1.66446	1.34297	0	0	1.41161	0	0	2.36278	0	0	2.20737	1.99886	1.35363	0	0	1.78023	0.768667	2.03517	0.464633	1.4571	2.52516	2.22532	1.73992	2.96255	0	2.03914	2.43281	0.978469
0.425702	0	0	0.220582	0.233018	0.179307	0	0	0.304196	0.282806	0.235	0	0	0	0.942034	1.50027	0.172373	0.470717	0.144173	0.102158	0.288067	0	0.388353	0.26363	0	0	0.475099	0	0	1.29184	0	0	0.36356	0.520519	0.219161	0	0	0.13861	0.119648	0.759475	0.250426	0.498224	0.318801	0.0974131	0.4437	0.259824	0	0.201907	0.444811	0.222068
0.178816	0	0	0.147003	0.224532	0.116761	0	0.0051458	0.184534	0.229322	0.0998588	0	0	0	0.356649	0.002488	0.101672	0.142931	0.128569	0.121918	0.17315	0	0.18748	0.10604	0	0	0.126913	0	0	0.475198	0	0	0.207525	0.239054	0.099756	0	0	0.113324	0.0929159	0.15655	0.10553	0.269832	0.258674	0.125572	0.246856	0.15848	0	0.234741	0.225879	0.286893
0.16326	0	0	0.151473	0.126964	0.0677665	0	0.0488439	0.178726	0.0911078	0.131937	0	0	0	0.250393	0	0.108961	0.184541	0.113023	0.19568	0.0741563	0	0.13989	0.137995	0	0	0.128937	0	0	0.377144	0	0	0.122627	0.17561	0.153261	0	0	0.15114	0.148353	0.179657	0.105755	0.213847	0.167559	0.197533	0.166512	0.147509	0	0.170488	0.196423	0.235054
0.133543	0	0	0.160257	0.0761491	0.176124	0	0.329917	0.117406	0.0496394	0.209478	0	0	0	0.190718	0	0.106648	0.167472	0.137422	0.15811	0.193067	0	0.164234	0.0991871	0	0	0.131689	0	0	0.27981	0	0	0.164914	0.176147	0.0460137	0	0	0.10872	0.0650239	0.0765924	0.0643979	0.166017	0.0966284	0.238284	0.167457	0.0863529	0	0.113008	0.0840799	0.161298
0.506254	0	0	0.305076	0.322605	0.314297	0	0	0.493005	0.269988	0.205642	0	0	0	0.357083	0.0213627	0.429213	0.320731	0.267484	0.333054	0.164492	0	0.413451	0.4333	0	0	0.274663	0	0	0.334177	0	0	0.214465	0.399505	0.387225	0	0	0.413887	0.395452	0.145393	0.29672	0.267516	0.501171	0.402178	0.307084	0.423095	0	0.28823	0.193473	0.642863
0.493195	0	0	0.148055	0.17998	0.250447	0	0	0.378542	0.31129	0.456433	0	0	0	0.563469	0.548258	0.46351	0.431205	0.514226	0.300869	0.318179	0	0.529301	0.380415	0	0	0.65385	0	0	0.479682	0	0	0.432935	0.604569	0.476303	0	0	0.462839	0.566295	0.450032	0.28139	0.257966	0.600908	0.465345	0.607353	0.595898	0	0.381646	0.468577	0.424163
0.46928	0	0	0.586479	0.0698651	0.441321	0	0	0.956398	0.795003	0.563729	0	0	0	0.821882	0.355765	0.404986	0.266054	0.523582	0.172993	0.689214	0	0.564949	0.931917	0	0	0.444425	0	0	0.214005	0	0	0.647971	0.451061	0.488757	0	0	0.561695	0.91557	0.653492	0.180364	0.553154	0.599607	0.672245	0.613923	0.684203	0	0.53532	0.384759	0.378202
0.38852	0	0	0.375233	0.42871	0.428497	0	0	0.367518	0.505387	0.403281	0	0	0	0.749732	0.896702	0.654557	0.49932	0.662023	0.653442	0.731995	0	0.760936	0.624729	0	0	0.113958	0	0	0.737466	0	0	0.379328	0.939378	0.516423	0	0	0.796166	0.912569	0.802745	0.495407	0.441249	1.05706	0.749415	1.1232	0.67849	0	0.767745	0.651922	0.451646
0.506982	0	0	0.315653	0.25018	0.745674	0	0	0.537439	0.3348	0.185864	0	0	0	0.806475	0.504533	0.340816	0.535563	0.607508	1.09286	0.378839	0	0.698652	0.30234	0	0	0.405907	0	0	0.692939	0	0	0.778911	1.13883	0.711919	0	0	0.440234	0.374281	0.735851	0.19125	0.329863	0.618064	1.26653	0.508846	0.935042	0	0.930217	0.497202	0.434628
0.788829	0	0	0.779484	0.566707	1.01531	0	0	0.975282	0.664752	0.318416	0	0	0	1.10253	0.810127	0.752959	0.273024	0.914783	0.708952	0.943695	0	0.63615	0.510724	0	0	1.51462	0	0	0.824442	0	0	0.602267	1.06409	0.995202	0	0	0.464126	0.953468	1.6113	0.422262	0.760483	0.76174	1.13139	0.363672	1.47514	0	0.968335	1.14475	0.517445
0.264146	0	0	0.391302	0.408527	0.464074	0	0	0.464964	1.08204	0.17045	0	0	0	0.726162	0.532421	0.349444	0.407085	0.747805	0.229854	0.43078	0	0.596568	0.352601	0	0	0.0761499	0	0	0.564852	0	0	0.658781	0.839872	0.405875	0	0	0.705948	0.515646	0.922164	0.136024	0.37935	0.759821	0.93948	0.758704	0.692769	0	0.842922	0.760572	0.233445
0.943259	0	0	0.760978	0.644317	0.664918	0	0	1.57998	2.14204	0.327804	0	0	0	0.615032	1.63756	0.970438	0.564079	1.85934	0	0.917316	0	0.715398	0.799591	0	0	0.8588	0	0	0.663342	0	0	1.12676	1.06334	1.36327	0	0.0484453	1.91041	0.901236	2.71005	0.657523	0.849267	1.0969	1.7804	1.33753	1.715	0	0.935735	2.58584	0.225963
0.203429	0	0	0.416003	0.486524	0.39787	0	0	0.657862	0.672317	0.343742	0	0	0	0.866992	0.562002	0.750141	0.381028	0.768667	0.744477	0.778565	0	0.596547	0.461474	0	0	0.962499	0	0	0.556417	0	0	0.649644	0.69799	0.942823	0	0	0.941553	0.775835	0.816091	0.329327	0.416739	0.939073	1.13165	0.441706	0.933637	0	0.384656	0.998947	0.46021
0.517373	0	0	0.441865	0.404505	0.519062	0	0	1.05116	1.0173	0.180758	0	0	0	0.804484	0.747749	0.625604	0.826332	1.02756	0.852463	0.650628	0	0.55908	0.421287	0	0	0.849182	0	0	0.314853	0	0	1.2199	1.54371	0.943493	0	0	1.01638	0.645306	1.27982	0.0652552	0.733572	0.920748	1.65662	0.707207	1.37075	0	0.79531	1.1489	0.246345
1.08155	0	0	0.417613	0.965475	0.553391	0	0	1.46401	1.20059	0.403558	0	0	0	1.04069	1.10422	0.716496	0.571966	1.05822	1.05916	0.807289	0	0.656733	0.709719	0	0	0.992128	0	0	0.59977	0	0	1.44419	0.985814	1.11231	0	0	1.69778	0.922736	1.45605	0.227621	0.590168	1.44596	1.88368	0.790397	1.75864	0	0.861483	1.29553	0.269975
0.580508	0	0	0.812256	0.835342	0.81165	0	0	1.26395	1.41761	0.482975	0	0	0	1.95728	0.688755	0.626744	0.644578	0.93525	1.00154	0.565548	0	0.988828	0.658175	0	0	0.706609	0	0	0.712853	0	0	1.04647	1.45576	1.12936	0	0	0.735065	0.714002	0.743713	0.234468	0.879822	1.19597	1.9746	0.705077	1.13269	0	1.35824	1.29948	0.688434
0.428094	0	0	0.287463	1.00283	0.564685	0	0	1.09076	1.10908	0.22722	0	0	0	1.78503	0.846054	0.630113	0.800289	0.873252	1.21451	0.420519	0	0.949626	0.756246	0	0	0.89446	0	0	0.788775	0	0	1.3897	1.20744	1.06689	0	0	0.805211	0.733394	0.690266	0.148061	0.607012	1.0806	1.78749	0.894802	1.67286	0	0.861708	1.02425	0.744836
1.16964	0	0	0.683804	0.897352	0.601519	0	0	1.34303	2.3394	0.309113	0	0	0	1.3298	1.43596	1.29428	0.609796	1.01196	2.01577	1.02624	0	0.650864	1.39857	0	0	1.13169	0	0	1.01006	0	0	2.0205	1.17814	0.766591	0	0	2.94292	0.992745	2.21723	0.540976	0.624463	1.89841	2.16971	1.15795	2.19739	0	1.57329	2.29874	0.443299
0.29693	0	0	0.641538	0.620307	0.298293	0	0	0.698598	1.15762	0.295185	0	0	0	0.923972	0.394862	0.17072	0.483871	0.384581	0.284275	0.322768	0	0.537756	0.649865	0	0	0.463149	0	0	0.456171	0	0	0.827745	0.872619	0.76206	0	0	0.639007	0.530966	0.758087	0.114917	0.458977	0.904116	1.00508	0.691192	1.24656	0	0.780251	0.84042	0.378141
0.8751	0	0	1.04387	0.663814	0.803875	0	0	2.49691	1.36407	0.260484	0	0	0	0.93104	3.03553	1.08507	0.794335	1.26462	0	1.38417	0	0.533393	0.921309	0	0	1.03714	0	0	0.951486	0	0	0.731553	1.07783	1.93912	0	1.08119	1.57659	1.29692	3.82601	0.444322	1.29204	0.417821	0.373327	0.918532	2.1496	0	1.00092	2.44658	0.371801
0.30758	0	0	0.404242	0.124983	0.437917	0	0	0.63291	0.538842	0.262938	0	0	0	0.474416	0.133375	0.318189	0.300015	0.223862	0.199198	0.40939	0	0.36725	0.388139	0	0	0.432827	0	0	0.207212	0	0	0.271532	0.467524	0.459837	0	0	0.291027	0.407943	0.298801	0.208358	0.46226	0.38862	0.403232	0.513259	0.440385	0	0.298275	0.399494	0.284967
0.334505	0	0	0.766997	0.26062	0.362485	0	0	1.42485	1.18976	0.253794	0	0	0	1.05757	1.16643	0.593095	0.473411	0.88661	0	0.7836	0	0.284295	0.532681	0	0	0.534397	0	0	0.637419	0	0	0.720906	0.832996	0.738891	0	0.0465876	1.17022	0.750998	1.8377	0.238071	0.914159	0.552676	0.613705	0	1.44147	0	0.954894	0.860495	0.342161
0.856942	0	0	0.678622	0.752263	0.906252	0	0	1.63363	0.94703	0.518727	0	0	0	1.82933	4.22541	0.710824	1.14239	1.35947	0.356256	0.819731	0	0.603321	1.53219	0	0	1.71613	0	0	2.9873	0	0	1.03595	1.22876	1.07367	0	0	1.17548	1.2597	2.85095	0.545018	1.55796	0.875748	0.925744	1.02363	1.69124	0	1.27484	1.49754	0.74707
0.894372	0	0	0.750214	0.762369	0.816001	0	0	1.24629	0.597544	0.449785	0	0	0	1.4553	3.88902	0.341544	0.280533	1.31549	1.27691	0.65239	0	1.36222	1.27765	0	0	0.519899	0	0	3.29564	0	0	0.547875	1.76975	0.559132	0	0	0.7972	0.316649	2.6675	0.37957	1.14152	0.808591	1.32774	0.908809	1.79737	0	1.77626	1.82988	0.414877
1.19836	0	0	1.20292	0.745436	0.745461	0	0	1.5238	1.20018	0.31134	0	0	0	1.8214	3.74178	0.683633	0.794318	0.999624	0.935786	0.53382	0	0.91874	1.1915	0	0	0.580032	0	0	2.4775	0	0	0.510716	1.5236	1.0804	0	0	1.31268	0.788693	3.12334	0.3468	1.39712	0.630823	0.784387	1.09093	2.29998	0	1.44026	1.83063	0.851956
0.887038	0	0	0.848421	0.885719	0.572065	0	0	1.14571	1.98016	0.199547	0	0	0	1.21453	2.1337	1.03771	0.482632	1.79709	1.91376	0.383986	0	1.38113	1.2193	0	0	0.844674	0	0	1.88891	0	0	2.04669	1.3656	0.747835	0	0	2.39075	0.569729	2.16622	0.361221	0.426308	1.84991	2.03099	1.06091	2.43769	0	1.5603	2.56151	0.739199
0.848607	0	0	0.517826	0.515355	0.396226	0	0	1.30068	1.13096	0.241749	0	0	0	0.656197	1.96153	0.726699	0.371351	1.10687	0.724659	0.639361	0	0.853521	0.847021	0	0	0.877789	0	0	1.35896	0	0	0.57067	1.32931	0.755265	0	0	1.36874	0.674451	2.16809	0.555706	0.598364	0.733847	1.38852	1.1597	1.6344	0	0.574532	1.54969	0.581155
0.544367	0	0	1.12046	0.815537	0.58808	0	0	1.84183	2.11437	0.351643	0	0	0	1.51449	1.99051	1.16047	0.7591	1.14691	0.418577	1.55503	0	0.394512	0.97125	0	0	1.17265	0	0	0.572135	0	0	1.14584	1.51688	1.60249	0	0	2.50336	1.36827	3.07549	0.446075	1.3943	1.29599	1.25749	0.874975	2.68043	0	0.873196	2.13517	0.127348
1.00415	0	0	0.849739	0.982347	0.958789	0	0	1.03025	1.22865	0.428745	0	0	0	0.604969	2.22044	0.897308	0.357474	1.57265	1.099	0.519523	0	1.03674	0.62139	0	0	1.55666	0	0	1.51435	0	0	0.724118	0.844811	1.03692	0	0	1.47813	0.663032	2.30782	0.463006	0.637807	1.33626	1.73603	1.54703	2.07737	0	1.35507	2.55286	0.517292
0.739644	0	0	0.430203	0.507023	0.837966	0	0	1.0005	0.553215	0.318015	0	0	0	0.77613	0.943866	0.829645	0.700026	0.497338	0.819176	0.633157	0	0.543968	0.233475	0	0	1.07983	0	0	0.909237	0	0	0.699622	0.929586	0.829255	0	0	0.648954	0.539722	0.951839	0.0937834	0.813623	0.678746	0.812593	0.592959	1.17359	0	0.403827	0.783336	0.392538
0.74866	0	0	0.51006	0.604297	0.489053	0	0	1.17831	0.753248	0.435239	0	0	0	0.675245	1.87482	0.518128	0.20981	1.30427	1.19468	0.604857	0	0.511164	0.781707	0	0	0.874797	0	0	1.24585	0	0	1.04357	1.20862	0.987178	0	0	1.68491	0.695963	2.01494	0.411001	0.701885	1.0248	1.52883	0.991268	1.77056	0	0.959792	2.01187	0.538768
0.517517	0	0	0.70038	0.547755	0.650617	0	0	1.13546	0.690807	0.408786	0	0	0	0.923687	2.69288	0.722231	0.498978	1.04814	0.531218	1.00232	0	1.06298	0.852582	0	0	1.00608	0	0	2.02182	0	0	0.555098	1.11117	0.686172	0	0	0.778786	0.713517	2.01314	0.617408	0.618328	0.77553	1.40812	0.777471	1.10535	0	0.930088	1.94561	0.453369
0.528962	0	0	0.762678	0.904954	0.587987	0	0	1.10731	1.10856	0.203014	0	0	0	0.54263	1.5635	1.25433	0.909966	0.68891	1.85349	0.915298	0	0.67906	0.629278	0	0	1.69404	0	0	1.5339	0	0	1.0604	0.924276	0.691116	0	0	1.58451	0.942637	1.08731	0.540574	0.917228	1.17785	1.0997	0.537472	1.5923	0	0.557437	1.96294	1.02423
0.94108	0	0	0.240048	0.70984	0.738549	0	0	0.835948	0.613204	0.425314	0	0	0	1.27427	1.75586	0.668966	0.31682	1.32863	1.61368	0.883943	0	0.598307	0.776912	0	0	1.13771	0	0	1.79657	0	0	1.25388	1.20174	0.853433	0	0	1.4989	0.970746	1.65632	0.317136	1.0499	1.11894	1.53196	0.404824	1.92613	0	1.44604	0.873601	0.59305
1.17238	0	0	1.06024	0.98384	0.709286	0	0	1.14198	0.895317	0.807421	0	0	0	0.931884	4.66335	0.644689	0.722296	1.90534	1.71302	0.432743	0	1.40565	1.03093	0	0	0.595269	0	0	4.06725	0	0	0.405068	2.39361	0.918323	0	0	1.31909	0.57489	3.14939	0.612254	1.56824	1.33446	1.45077	1.4825	2.23165	0	2.2429	2.51788	0.910263
0.671891	0	0	0.695439	0.701136	0.781786	0	0	2.32123	0.84634	0.429905	0	0	0	1.00761	2.9927	1.07775	0.627041	1.37855	0.431265	1.36646	0	0.51337	1.07523	0	0	1.15827	0	0	1.44448	0	0	0.962012	1.39158	1.43424	0	0	1.80885	0.972564	3.23279	0.428219	1.21077	0.913555	0.883925	0.454564	2.03402	0	1.38659	2.2231	0.281697
1.17007	0	0	0.756371	0.463661	0.90999	0	0	2.46905	1.74065	0.31922	0	0	0	1.19797	3.0836	1.10183	0.622561	1.81204	0.515511	1.44589	0	0.364568	0.836043	0	0	0.978033	0	0	1.37667	0	0	1.66476	1.32309	1.984	0	0	1.65166	1.25596	3.82805	0.419778	1.1288	0.617854	0.652429	1.17698	2.40549	0	1.56816	2.72578	0.575757
0.949082	0	0	0.636312	0.394698	0.630018	0	0	1.93013	1.28268	0.104888	0	0	0	0.84182	2.14712	0.720742	0.732156	1.4633	1.19381	0.82169	0	0.631475	0.577785	0	0	0.833679	0	0	1.19049	0	0	1.40634	1.02508	1.39502	0	0	1.28083	1.15533	2.7229	0.216061	1.08158	0.411807	0.586432	0.748239	2.28696	0	1.60683	1.58143	0.555328
0.753989	0	0	0.775814	0.595429	0.658114	0	0	1.5976	1.25609	0.265153	0	0	0	0.755204	1.53934	0.566473	0.729004	1.42273	1.68033	0.86312	0	0.589835	0.57738	0	0	1.01125	0	0	0.922325	0	0	1.25296	1.03419	0.66964	0	0	2.13108	0.837171	2.185	0.282087	0.599655	1.03352	1.30618	0.635259	2.15224	0	1.25688	2.22785	0.513891
0.243196	0	0	0.313609	0.250038	0.562353	0	0	0.356272	0.800527	0.461351	0	0	0	0.953183	0.719979	0.398983	0.779412	0.731831	0.306928	0.577175	0	0.600024	0.493155	0	0	0.442286	0	0	0.875292	0	0	0.544573	0.667632	0.553711	0	0	0.430801	0.445647	0.834074	0.152555	0.795835	0.88786	0.824068	0.567811	0.651548	0	0.852489	0.540213	0.375244
0.867428	0	0	0.812742	0.614767	0.791913	0	0	2.6208	1.13285	0.327754	0	0	0	1.55115	3.33501	1.12831	1.02523	1.58292	0.299326	1.69964	0	0.76428	1.45353	0	0	1.15903	0	0	1.8102	0	0	0.932838	1.71233	1.51461	0	0	1.67066	1.29423	3.59818	0.404247	1.09538	0.463639	1.10514	0.465437	2.23133	0	1.52343	2.22076	0.467923
0.499457	0	0	0.488809	0.464713	0.497381	0	0	0.743271	0.87127	0.690832	0	0	0	0.737288	0.61912	0.479184	0.566871	0.337982	0.202203	0.760959	0	0.906219	0.780973	0	0	0.348021	0	0	0.580368	0	0	0.371177	0.712829	0.78084	0	0	0.285731	0.70325	0.707434	0.446417	0.659071	0.961174	0.562324	0.734858	0.647091	0	0.325674	0.902437	0.522095
1.23814	0	0	0.870948	0.988072	0.773832	0	0	2.77673	1.20462	0.438159	0	0	0	0.743039	3.66738	1.36151	0.820544	1.8161	1.34722	1.88493	0	0.576278	0.940235	0	0	1.03535	0	0	2.22733	0	0	1.0197	1.46814	1.69821	0	0	2.3259	1.21803	3.87856	0.390765	1.23574	1.21713	1.09161	0.587383	2.8261	0	1.86796	3.2666	0.776572
1.27297	0	0	0.767413	0.921737	0.898914	0	0	1.45588	1.25666	0.70839	0	0	0	1.39008	3.73314	0.210396	0.656726	1.17106	0.0945072	0.620922	0	1.10395	1.31801	0	0	1.35931	0	0	2.5133	0	0	0.596837	1.16255	0.823488	0	0	0.927212	0.689447	2.33021	0.573891	0.925431	0.711063	0.986478	1.39002	1.28753	0	0.751083	1.70189	0.9236
0.7717	0	0	0.585961	0.634418	0.67436	0	0	1.76507	0.662484	0.491327	0	0	0	1.04828	3.6057	0.368482	0.82283	0.980443	0.712398	1.02181	0	0.702676	0.903805	0	0	1.01345	0	0	2.42008	0	0	0.601458	1.24464	1.20992	0	0	0.77515	0.93756	2.52559	0.260672	1.13228	0.636292	0.573796	0.758393	1.51845	0	1.12115	1.80447	0.721429
1.06282	0	0	0.275451	0.373607	0.536965	0	0	1.17602	0.842736	0.285062	0	0	0	1.02943	2.28458	0.520592	0.497952	0.936161	0.434205	0.60521	0	0.722345	0.569261	0	0	0.745718	0	0	1.6599	0	0	0.738687	1.32223	0.744422	0	0	0.866778	0.475383	2.21158	0.350876	0.916875	0.513804	0.799336	1.42147	1.66424	0	1.343	1.10687	0.378669
0.773509	0	0	0.474593	0.824549	0.539593	0	0	1.04055	1.01887	0.435569	0	0	0	1.70772	0.892715	1.01302	0.85961	0.554544	0.503492	0.535998	0	0.828649	0.51374	0	0	0.792606	0	0	0.529421	0	0	0.724677	0.910096	0.948661	0	0	1.06419	0.867821	0.915112	0.221744	1.0678	1.11285	1.34551	0.630089	1.55776	0	0.827073	1.14479	0.555914
0.805921	0	0	0.332101	1.17133	0.577611	0	0	1.25594	1.7205	0.32727	0	0	0	1.84739	1.2375	0.839497	1.08705	0.615968	1.05859	0.752522	0	0.935211	1.53382	0	0	1.13338	0	0	0.893365	0	0	1.72773	1.08357	0.890103	0	0	1.41177	1.20851	1.19707	0.170939	0.940675	1.38748	2.08239	1.05478	1.74413	0	0.568497	1.52715	0.723611
1.33391	0	0	1.25624	0.9279	0.771057	0	0	2.74056	1.25698	0.324733	0	0	0	1.11874	3.69767	1.16828	0.687181	2.2307	1.46463	1.46184	0	0.978192	1.2585	0	0	1.25144	0	0	2.10547	0	0	1.33501	1.77414	1.67418	0	0	2.71054	1.27168	4.02946	0.496125	1.21784	1.24498	1.52672	0.366333	3.16735	0	2.01493	3.08709	0.681738
0.319844	0	0	0.845066	0.867601	0.650845	0	0	0.932199	0.984071	0.282719	0	0	0	0.962007	0.949288	0.72259	0.333611	0.610054	0.823823	0.786957	0	0.771825	0.549899	0	0	0.861098	0	0	1.05597	0	0	0.679349	1.07378	0.60572	0	0	0.754207	0.415276	1.11311	0.272103	0.621632	1.39045	1.73153	0.820682	1.29109	0	1.26248	1.25949	0.426041
0.389237	0	0	0.220384	0.228917	0.0981902	0	0	0.313161	0.194215	0.289538	0	0	0	0.831925	1.29999	0.145114	0.417067	0.131202	0.178566	0.301301	0	0.372093	0.255895	0	0	0.457379	0	0	1.18798	0	0	0.330864	0.520685	0.204166	0	0	0.160901	0.168055	0.68611	0.290797	0.42157	0.284015	0.09466	0.375748	0.220222	0	0.180545	0.420801	0.242492
0.175315	0	0	0.146587	0.160963	0.0971417	0	0	0.175002	0.232489	0.200454	0	0	0	0.42614	0.225264	0.0693788	0.131295	0.126461	0.12552	0.194481	0	0.18184	0.173399	0	0	0.257765	0	0	0.573678	0	0	0.182925	0.227833	0.121682	0	0	0.133904	0.127711	0.271021	0.0777561	0.223613	0.25706	0.182689	0.254665	0.127026	0	0.22591	0.339531	0.122488
0.154524	0	0	0.171208	0.141746	0.0517485	0	0.0385553	0.186415	0.102687	0.112609	0	0	0	0.238887	0	0.140005	0.256306	0.0735407	0.221294	0.0726973	0	0.279631	0.165595	0	0	0.180243	0	0	0.332053	0	0	0.131834	0.194927	0.212907	0	0	0.178291	0.0521557	0.184049	0.158683	0.246167	0.21576	0.117536	0.12639	0.129079	0	0.110831	0.206195	0.215645
0.114017	0	0	0.0970099	0.0802221	0.203615	0	0.331798	0.0845243	0.0463429	0.173166	0	0	0	0.211833	0	0.118237	0.189059	0.110063	0.124216	0.149376	0	0.173592	0.0759087	0	0	0.174385	0	0	0.298554	0	0	0.148682	0.142893	0.0915991	0	0	0.13994	0.0454719	0.0999246	0.0772679	0.155228	0.104144	0.208633	0.182019	0.0827687	0	0.127492	0.120918	0.14869
0.257002	0	0	0.29123	0.323795	0.131162	0	0.0429955	0.372616	0.232372	0.40557	0	0	0	0.489745	0	0.333982	0.340998	0.339453	0.621629	0.440793	0	0.475048	0.431918	0	0	0.253752	0	0	0.217863	0	0	0.304817	0.309406	0.311772	0	0	0.297448	0.475432	0.143161	0.246791	0.340467	0.42208	0.592405	0.252758	0.410096	0	0.475968	0.2257	0.291698
0.263183	0	0	0.282344	0.355312	0.47879	0	0	0.657888	0.51813	0.413342	0	0	0	0.587909	0.489409	0.363063	0.713727	0.575803	0.71502	0.777338	0	0.429307	0.381868	0	0	0.516505	0	0	0.57159	0	0	0.56465	0.750834	0.745694	0	0	0.321195	0.906262	0.40485	0.206025	0.435447	0.672329	1.01358	0.511671	0.774884	0	0.724943	0.532306	0.200268
1.01719	0	0	0.429949	0.789108	0.798645	0	0	1.39389	1.09052	0.448758	0	0	0	1.16471	1.16412	1.06831	0.388311	0.767521	1.64437	1.19328	0	0.792471	0.939041	0	0	1.39696	0	0	1.02447	0	0	1.0959	1.43034	0.828026	0	0	1.49022	0.974539	1.24244	0.349614	1.00491	1.05271	2.19489	0.25743	1.55805	0	1.16498	1.44616	0.673703
0.467382	0	0	0.227109	0.473234	0.45213	0	0	1.01507	1.02749	0.248627	0	0	0	1.04245	0.647449	1.16449	0.457723	0.751539	0.549758	0.814626	0	0.594679	0.742086	0	0	0.856744	0	0	0.505138	0	0	0.749775	0.819114	0.996091	0	0	0.699447	0.905387	1.15698	0.305381	0.658017	1.27891	1.34674	0.989203	1.37299	0	0.918731	1.18813	0.563801
0.338977	0	0	0.428922	0.115638	0.279388	0	0	0.444305	0.48788	0.259837	0	0	0	0.525244	0.100931	0.173219	0.363276	0.523039	0.575506	0.432863	0	0.466757	0.42763	0	0	0.327254	0	0	0.389922	0	0	0.501216	0.979751	0.376461	0	0	0.355354	0.487862	0.239892	0.107527	0.41465	0.434875	0.943345	0.835138	0.751193	0	0.672354	0.403749	0.185853
0.647008	0	0	0.52428	0.687471	0.458284	0	0	0.815789	1.08023	0.28836	0	0	0	0.820367	0.28174	0.861369	0.578726	0.435918	0.60689	0.520705	0	0.515546	0.621113	0	0	0.750397	0	0	0.292231	0	0	0.676337	0.833185	0.537925	0	0	1.03378	0.698177	0.744015	0.168438	0.544021	0.853979	1.6353	0.505439	1.36193	0	0.536862	0.965864	0.338858
0.361264	0	0	0.193449	0.194048	0.478885	0	0	0.900112	0.472373	0.306031	0	0	0	0.943178	0.388087	0.600835	0.667368	0.588675	0.617761	0.56516	0	0.690979	0.555526	0	0	0.903137	0	0	0.370033	0	0	0.730929	0.836084	0.589922	0	0	0.818066	0.685333	0.552451	0.337405	0.516021	0.618989	1.11512	0.358297	0.814325	0	0.337596	0.315673	0.488005
0.850924	0	0	0.271828	0.667009	0.409384	0	0	1.04505	1.02469	0.336947	0	0	0	0.831214	0.315019	0.753546	0.78576	0.673974	0.642406	0.842832	0	0.495618	0.661743	0	0	0.941968	0	0	0.165004	0	0	0.759104	0.636875	0.952861	0	0	1.2231	0.808782	0.936395	0.171352	0.46845	0.886394	1.47635	0.680097	1.82491	0	0.347833	1.14331	0.602889
0.25948	0	0	0.510038	0.576611	0.608912	0	0	0.241618	0.821084	0.410848	0	0	0	0.91187	0.441166	0.680214	0.512678	0.583938	0.410831	0.613711	0	0.764105	0.51316	0	0	0.630365	0	0	0.365218	0	0	0.293817	1.0377	0.913987	0	0	0.351578	0.475747	0.527079	0.193182	0.626461	0.621508	1.0726	0.763329	0.641601	0	0.714847	0.982739	0.434022
0.548462	0	0	0.774776	0.295468	0.374967	0	0	1.20641	0.982873	0.204277	0	0	0	1.42332	0.502907	0.860287	0.777653	0.997782	0	0.977246	0	0.798196	0.732576	0	0	0.480699	0	0	0.590061	0	0	0.630238	0.889508	0.572737	0	0.31631	0.593326	1.04241	0.940105	0.253447	1.0197	0.803417	1.72952	0.488565	1.48272	0	0.362666	0.559598	0.480753
0.352129	0	0	0.599862	0.409795	0.571235	0	0	0.740565	0.489873	0.412655	0	0	0	0.977589	0.513749	0.737418	0.820115	0.676664	0.823221	0.581798	0	0.861648	0.0745112	0	0	1.00301	0	0	0.879383	0	0	0.91486	0.950839	1.06296	0	0	0.648127	0.452667	0.676843	0.364675	0.66024	0.879397	1.85952	0.592315	1.20619	0	0.984913	0.66236	0.333117
0.678855	0	0	0.333636	0.664405	0.275057	0	0	1.20678	0.630317	0.187405	0	0	0	1.0359	0.822439	0.597102	0.861217	0.460715	0.879167	0.637395	0	0.290444	0.675425	0	0	0.860818	0	0	0.942587	0	0	0.549113	1.37403	1.34245	0	0	0.332647	0.432066	0.58447	0.304749	0.631924	0.610788	1.25071	0.359237	0.87442	0	0.627151	1.06565	0.83367
0.982863	0	0	0.809072	1.08797	1.04849	0	0	1.32367	0.968441	0.60399	0	0	0	1.90513	1.27277	0.792771	1.20274	1.04115	1.04817	0.454194	0	1.14781	0.282196	0	0	1.09488	0	0	1.18644	0	0	0.939389	1.94815	1.73944	0	0	0.214423	1.05276	0.460786	0.325175	1.24093	1.18371	1.50027	0.9379	1.59666	0	1.43915	1.37401	1.26831
0.892275	0	0	0.618735	1.05605	0.967481	0	0	0.523391	2.46586	0.354878	0	0	0	1.65384	1.72509	0.925223	0.834961	0.730423	1.73885	0.71982	0	0.874049	1.10611	0	0	1.32032	0	0	1.29034	0	0	1.57481	1.25517	0.774455	0	0	2.00344	0.587467	1.75146	0.444563	0.54497	1.49359	2.25594	1.59157	1.5197	0	1.51513	2.0831	0.554847
0.283843	0	0	0.880683	0.527673	0.449193	0	0	0.694907	0.896596	0.442797	0	0	0	1.31507	0.604301	0.393538	0.478161	0.61311	0.292401	0.529537	0	0.818208	0.415355	0	0	0.761399	0	0	0.963368	0	0	0.458974	1.47208	1.27436	0	0	0.0881302	0.880787	0.571601	0.512723	0.75345	0.833812	1.70218	0.826659	1.2082	0	1.07805	0.950819	0.825253
0.983353	0	0	0.443028	0.706762	0.464257	0	0	1.2696	1.95297	0.208021	0	0	0	0.678199	0.885992	0.879048	0.612745	1.20274	0.704638	0.572607	0	0.449141	0.840557	0	0	0.648452	0	0	0.51654	0	0	1.08114	0.73259	0.906036	0	0	1.81761	1.04277	1.69754	0.289171	0.768944	1.16424	1.33718	0.65883	1.69397	0	0.495222	1.72913	0.153365
0.180468	0	0	0.306636	0.113517	0.247107	0	0.00955714	0.494674	0.458528	0.179742	0	0	0	0.392012	0.00169901	0.226825	0.215657	0.286975	0.146164	0.577028	0	0.310354	0.405981	0	0	0.323669	0	0	0.160039	0	0	0.271823	0.22072	0.350734	0	0	0.363345	0.47341	0.40266	0.175809	0.324031	0.310037	0.506641	0.17083	0.374101	0	0.273939	0.399549	0.183878
1.04225	0	0	0.858342	0.185039	0.59943	0	0	1.41176	2.01823	0.288726	0	0	0	1.45272	1.78836	1.0539	0.743208	1.72182	2.07404	0.869835	0	0.513579	0.752669	0	0	0.924786	0	0	1.42932	0	0	1.53068	1.48966	0.89393	0	0	2.6619	0.880764	2.89945	0.365633	1.02477	1.44961	1.55042	0.544469	2.9799	0	1.73304	2.27053	0.405233
0.817957	0	0	0.682156	0.920798	0.68501	0	0	1.47677	0.589305	0.343447	0	0	0	1.33442	3.31279	0.595341	0.340775	0.973173	0.215213	0.936063	0	0.772204	1.09791	0	0	0.978595	0	0	2.39912	0	0	0.478833	1.57462	0.765485	0	0	1.26443	0.904405	2.68469	0.537574	1.53828	1.08186	1.1031	1.01583	1.68223	0	1.31555	1.77183	0.523443
1.51911	0	0	1.16726	1.07389	1.11895	0	0	0.473316	0.75627	0.68852	0	0	0	3.33257	8.45043	0.430022	1.4311	0.540995	0.740931	0.595579	0	1.60064	1.47963	0	0	1.44868	0	0	5.56549	0	0	0.942584	1.54868	1.21673	0	0	0.491908	0.392123	3.84847	0.806651	1.64776	1.58057	1.03068	1.54732	1.20288	0	0.90984	2.51061	0.963043
0.847482	0	0	0.763325	0.80517	0.687578	0	0	1.25325	0.454172	0.319226	0	0	0	0.822734	2.70393	0.444309	0.292864	0.963377	1.08974	0.307745	0	1.12223	0.687222	0	0	0.695518	0	0	2.0128	0	0	0.403896	0.962556	0.827595	0	0	0.89202	0.364395	1.92563	0.40203	0.788277	0.65575	0.930516	0.745921	1.42512	0	1.07213	1.94596	0.538646
0.742045	0	0	0.564572	0.510778	0.437988	0	0	0.978872	0.969633	0.158361	0	0	0	1.08614	1.13205	0.617211	0.493169	1.1449	1.56353	0.217159	0	0.816571	0.571572	0	0	0.460737	0	0	0.870768	0	0	1.36596	1.21881	0.585325	0	0	1.3169	0.330062	1.39883	0.123814	0.411185	1.03018	1.25421	0.433045	1.45908	0	1.14608	1.33234	0.186409
0.949874	0	0	0.84739	0.974053	0.464065	0	0	1.05621	1.23606	0.314304	0	0	0	0.143228	1.90643	0.498904	0.593117	1.46883	2.47292	0.498036	0	0.769023	0.573073	0	0	0.794525	0	0	1.83675	0	0	1.33078	1.12897	0.770014	0	0	2.02901	0.532335	1.5114	0.359935	0.779135	1.98199	1.35469	0.935863	2.14719	0	1.25896	2.67213	0.785057
1.16491	0	0	0.649652	1.35777	0.703005	0	0	1.72478	1.93644	0.407361	0	0	0	1.66504	0.882548	0.635555	1.10553	0.751594	0.132216	0.997164	0	0.800784	0.485595	0	0	0.937905	0	0	0.156349	0	0	0.842629	1.14769	1.27783	0	0	1.29212	1.18663	1.01034	0.218059	0.892353	1.74522	2.09468	1.16891	1.81444	0	0.555785	1.36548	0.57599
0.298795	0	0	0.560229	0.395039	0.527836	0	0	0.716131	0.937994	0.262477	0	0	0	0.792783	0.683635	0.692866	0.494794	0.883975	0.554463	0.926175	0	0.55703	0.698313	0	0	0.616826	0	0	0.642216	0	0	0.653476	0.870311	1.14115	0	0	0.652767	0.71784	1.10419	0.168381	0.473949	0.980829	1.02292	0.444326	1.04682	0	0.633162	1.16525	0.533936
1.48405	0	0	1.37832	1.2431	1.44054	0	0	1.35284	0.919869	0.371009	0	0	0	3.36282	8.32948	0.719539	1.92874	0.369193	0.27347	0.663565	0	2.08966	1.81153	0	0	2.12532	0	0	5.69778	0	0	0.993887	1.82577	1.58839	0	0	0.913945	0.851793	4.33278	0.538111	1.93404	1.1463	1.05905	1.69802	2.09826	0	1.14068	2.79905	1.17513
0.372886	0	0	0.757295	0.631649	0.451808	0	0	1.12637	1.23283	0.309651	0	0	0	0.904508	1.01829	0.665944	0.550438	1.26158	0.380189	0.76062	0	0.623349	0.488744	0	0	1.19778	0	0	0.685793	0	0	1.21022	0.769885	1.06731	0	0	1.40037	0.914022	1.37248	0.251405	0.545022	1.06321	1.53638	0.380529	1.33017	0	0.779361	1.50171	0.379311
0.808849	0	0	0.862112	0.58489	0.570748	0	0	1.78674	0.832875	0.691931	0	0	0	1.04727	3.23233	0.603516	0.667757	1.44773	0.799801	1.36044	0	0.827764	0.842312	0	0	0.973851	0	0	2.50252	0	0	0.68027	1.6557	1.06936	0	0	1.32389	1.34164	2.68646	0.440627	1.53054	1.13484	1.29216	0.855306	2.05845	0	1.54561	1.9836	0.568858
0.445433	0	0	0.370474	0.343885	0.438731	0	0	0.452909	0.537057	0.280066	0	0	0	0.719289	0.657269	0.423105	0.166864	0.524882	0.840819	0.65041	0	0.480659	0.351223	0	0	0.619302	0	0	0.646682	0	0	0.618018	0.532947	0.341536	0	0	0.479876	0.634908	0.638903	0.350541	0.301949	0.539662	0.97294	0.62277	0.714485	0	0.772487	0.860192	0.461283
0.740376	0	0	0.471638	0.811502	0.573805	0	0	0.789801	0.42659	0.384374	0	0	0	0.818115	1.58995	0.928188	0.0558285	1.04352	1.70933	0.605404	0	0.756744	0.621217	0	0	0.708319	0	0	1.48019	0	0	1.03405	1.223	0.987129	0	0	1.02997	0.523886	1.36656	0.320886	0.721257	1.13846	1.79452	0.630945	1.43399	0	1.4402	1.75425	0.649915
0.815434	0	0	0.659753	0.621697	0.148391	0	0	1.61475	1.15641	0.363528	0	0	0	1.11733	1.74215	1.05737	0.505825	1.2337	1.29668	0.735051	0	0.662988	0.767531	0	0	0.664906	0	0	1.41503	0	0	1.27693	1.41724	0.641601	0	0	2.16881	0.843469	2.57353	0.437554	1.2846	1.08005	1.12428	0.466542	2.64891	0	1.92416	1.02554	0.506248
1.55758	0	0	1.35632	1.69826	0.860896	0	0	1.2282	0.511343	0.572839	0	0	0	2.15591	6.08808	0.895089	0.580466	1.71978	0.478745	0.999808	0	2.57686	2.25147	0	0	0.547756	0	0	4.83592	0	0	0	2.3869	1.18328	0	0	0.921877	0.500636	3.89002	0.601573	1.63372	0.948665	2.39845	1.94124	1.95817	0	2.14125	3.67697	1.05226
0.77607	0	0	0.9466	0.65323	0.610307	0	0	2.17753	1.32222	0.306431	0	0	0	0.882027	2.82848	0.963306	0.467933	1.21514	0.254527	1.02249	0	0.408485	0.692811	0	0	0.897848	0	0	1.37149	0	0	1.01133	0.985993	1.41927	0	0	1.67745	0.97417	3.39026	0.524922	1.34392	0.828677	0.651838	0.954297	2.26845	0	1.4073	2.50836	0.488292
1.00753	0	0	0.340395	0.29629	0.470533	0	0	1.33907	1.0135	0	0	0	0	1.22027	0.84873	0.480926	0.399361	1.65243	1.60159	0.30143	0	0.853587	0.553905	0	0	0.495013	0	0	0.860606	0	0	1.93028	1.12333	0.962008	0	0	1.32283	0.55726	1.76552	0.152106	0.427679	0.440299	1.04402	0.424891	1.80738	0	1.75536	0.978269	0.386052
0.982029	0	0	1.3172	1.15628	1.05912	0	0	3.21606	2.04513	0.39524	0	0	0	1.47022	3.0676	1.27331	1.84031	1.95605	2.0789	1.73481	0	0.625469	0.999497	0	0	1.91601	0	0	1.24415	0	0	1.80731	1.4151	1.95579	0	0	3.04062	1.61678	3.9506	0.565415	1.33193	0.435681	0.807844	0.795009	3.63555	0	2.20443	3.43955	1.55149
0.616522	0	0	0.353011	0.4627	0.604716	0	0	1.32745	0.681119	0.538655	0	0	0	1.51292	0.947663	0.954631	0.944144	0.226846	0.194052	1.13961	0	0.529889	0.89048	0	0	0.669403	0	0	0.648443	0	0	0.797293	0.769641	1.38562	0	0	1.01897	1.11978	1.30871	0.193602	1.00463	1.3643	1.2406	0.728572	1.66017	0	0.679835	0.420664	0.527565
0.909106	0	0	0.483589	0.474594	0.570599	0	0	1.55528	0.715719	0.258523	0	0	0	0.630016	1.69864	0.763394	0.203769	1.17361	2.15796	1.0327	0	0.427025	0.73718	0	0	1.01478	0	0	1.45169	0	0	1.1657	0.759519	0.55065	0	0	1.51321	0.558781	1.82829	0.312485	0.402281	0.625405	1.52644	0.410733	1.52668	0	1.33903	1.99677	0.272983
0.30723	0	0	0.526388	0.429438	0.47516	0	0	0.495929	0.467379	0.321212	0	0	0	0.78394	0.315238	0.329406	0.241156	0.36615	0.293548	0.702986	0	0.297001	0.361752	0	0	0.57438	0	0	0.477882	0	0	0.399113	0.179664	0.282292	0	0	0.428664	0.931219	0.339586	0.365314	0.641002	0.36812	0.516347	0.502236	0.434876	0	0.449319	0.600699	0.438701
0.855547	0	0	0.396528	0.338909	0.465422	0	0	1.10963	1.07868	0.219135	0	0	0	0.559368	1.15098	0.700849	0.434734	1.26961	0.886904	0.604828	0	0.56744	0.53043	0	0	0.48307	0	0	0.744725	0	0	0.978267	0.869054	0.974543	0	0	1.31282	0.399575	1.76509	0.217819	0.45161	0.910877	1.11931	0.605278	1.42929	0	0.933064	1.73697	0.267148
0.852064	0	0	0.421788	0.80005	0.554706	0	0	1.69149	0.43685	0.614646	0	0	0	0.659287	2.21625	0.58246	1.06088	0.682904	0.468171	0.846558	0	0.880013	0.771957	0	0	1.4056	0	0	1.36887	0	0	0.38411	0.880331	1.06457	0	0	1.07818	0.960828	1.46803	0.290538	0.977334	0.737027	0.520033	0.427987	1.40621	0	0.242027	1.1258	0.667165
0.948687	0	0	1.06929	0.966859	0.754251	0	0	1.99571	0.921478	0.626643	0	0	0	1.60517	5.17344	0.723597	1.02623	1.18675	0.939062	1.17392	0	1.10625	1.38027	0	0	1.0148	0	0	3.72019	0	0	0.730991	1.55377	1.28909	0	0	1.00595	1.21885	3.33059	0.561229	1.61478	0.90978	0.865735	0.866821	1.85557	0	1.43967	2.40989	0.929543
1.29391	0	0	0.937785	0.769062	1.12606	0	0	0.935449	0.94284	0.44294	0	0	0	1.89253	3.83461	0.569448	1.11009	1.19889	0.284547	0.566508	0	1.33106	0.983026	0	0	0.796223	0	0	2.94853	0	0	0.562275	1.90753	1.25022	0	0	1.01514	0.529801	2.76554	0.0642348	1.04893	0.804499	1.01768	1.50505	1.70562	0	1.65769	1.77605	0.946868
0.606092	0	0	0.558853	1.06802	0.575347	0	0	1.55596	1.57042	0.28628	0	0	0	1.80372	1.14101	0.993616	0.630833	0.768346	0.290041	0.776645	0	0.880143	1.20517	0	0	1.24225	0	0	0.726268	0	0	1.1751	0.770015	1.14163	0	0	1.67253	1.05271	1.44724	0.184433	0.655429	1.12182	2.03961	1.04843	1.98222	0	0.650368	1.00699	0.72936
1.44743	0	0	0.473376	1.16737	0.533303	0	0	2.0545	1.70463	0.136564	0	0	0	1.68341	1.79612	0.917206	0.520116	1.74643	1.70126	1.04525	0	1.45846	1.63034	0	0	1.05188	0	0	1.67602	0	0	1.86819	1.29495	0.71966	0	0	2.16716	1.27729	1.87337	0.338002	0.439448	1.77841	2.81537	1.05424	2.56424	0	1.28501	2.44521	0.7354
0.711072	0	0	0.0639915	0.71752	0.610936	0	0	1.43193	0.511224	0.087032	0	0	0	1.62038	0.550608	0.984475	0.281231	1.268	1.60342	0.551291	0	0.857262	0.826404	0	0	0.833465	0	0	0.746092	0	0	1.65869	1.51612	0.652204	0	0	1.6088	0.630505	1.33994	0.0589597	0.703411	0.881668	1.95091	0.329463	1.90981	0	1.19264	0.987183	0.332557
0.334654	0	0	0.299777	0.49921	0.84588	0	0	0.385136	0.239912	0.0684718	0	0	0	0.80475	0.587989	0.198427	0.795169	1.00276	0.64697	0.637425	0	0.709748	0.427644	0	0	0.719571	0	0	0.929736	0	0	0.417921	2.21892	0.60987	0	0	0.513309	0.435863	0.722875	0.203311	0.94291	1.05938	1.22156	1.27275	1.1095	0	0.894099	0.522583	0.476224
0.396037	0	0	0.197802	0.2257	0.120378	0	0	0.258635	0.174025	0.364191	0	0	0	0.749479	1.06641	0.138918	0.370745	0.129287	0.10379	0.279993	0	0.310349	0.224091	0	0	0.410146	0	0	1.0925	0	0	0.305654	0.475155	0.142597	0	0	0.109795	0.159056	0.583724	0.176758	0.384635	0.227409	0.115364	0.388121	0.236696	0	0.152344	0.386127	0.245799
0.184007	0	0	0.217256	0.156538	0.0948247	0	0	0.0762129	0.240044	0.189814	0	0	0	0.378828	0.0391334	0.183373	0.174031	0.187141	0.034609	0.259352	0	0.219403	0.339372	0	0	0.169998	0	0	0.49775	0	0	0.153957	0.22013	0.209721	0	0	0.0875268	0.14811	0.248324	0.0480355	0.155247	0.242085	0.220156	0.201883	0.154087	0	0.241708	0.343694	0.22655
0.174451	0	0	0.0112616	0.131604	0.126377	0	0	0.0914634	0.116828	0.127924	0	0	0	0.36427	0.201959	0.0637617	0.302217	0.197483	0.152051	0.144871	0	0.124038	0.0712889	0	0	0.235116	0	0	0.496541	0	0	0.20639	0.243707	0.229645	0	0	0.164567	0.167427	0.279365	0.116208	0.276992	0.201233	0.158247	0.288394	0.140703	0	0.197617	0.248132	0.154767
0.202852	0	0	0.128833	0.115302	0.188366	0	0.411031	0.0809496	0.045084	0.227907	0	0	0	0.295022	0	0.0728066	0.128803	0.176444	0.142405	0.165089	0	0.152857	0.143409	0	0	0.228998	0	0	0.318672	0	0	0.204981	0.170144	0.0331983	0	0	0.174175	0.150973	0.107598	0.0685221	0.153807	0.110931	0.245263	0.215442	0.0986515	0	0.196359	0.106022	0.182246
0.73174	0	0	0.521679	0.54768	0.516944	0	0	0.621202	0.18091	0.194148	0	0	0	0.70047	0.307811	0.598816	0.448389	0.0510102	0.021464	0.197128	0	0.70889	0.664181	0	0	0.604781	0	0	0.516644	0	0	0.302042	0.393296	0.280595	0	0	0.387264	0.221538	0.373193	0.189289	0.575603	0.5637	0.49437	0.39926	0.545453	0	0.337672	0.34794	0.358721
0.454057	0	0	0.525965	0.228024	0.655748	0	0	0.597225	0.430244	0.656856	0	0	0	0.694676	0.245269	0.166687	0.193532	0.489482	0.372233	0.583816	0	0.366288	0.565656	0	0	0.792438	0	0	0.645897	0	0	0.503827	0.459717	0.295299	0	0	0.264319	0.577695	0.205362	0.200699	0.858799	0.539495	0.506326	0.686861	0.44402	0	0.712857	0.524737	0.391702
0.30561	0	0	0.571975	0.315362	0.422383	0	0	0.597403	0.630878	0.294741	0	0	0	0.447392	0.667009	0.556151	0.417703	0.473696	0.13802	0.761924	0	0.551365	0.834198	0	0	0.734729	0	0	0.307442	0	0	0.410609	0.464701	0.745714	0	0	0.578321	0.847903	0.685144	0.297838	0.532809	0.903072	0.599337	0.497689	0.700582	0	0.373443	0.470822	0.629671
0.13446	0	0	0.279447	0.457881	0.582474	0	0	0.192078	0.570915	0.389243	0	0	0	0.839747	0.316344	0.30711	0.403089	0.441017	0.541423	0.682348	0	0.472542	0.491305	0	0	0.348108	0	0	0.344608	0	0	0.495544	0.643631	0.529944	0	0	0.307205	0.298279	0.545792	0.203558	0.367431	0.519766	0.780406	0.628234	0.458205	0	0.605644	0.621403	0.237522
0.20406	0	0	0.150872	0.0456746	0.228098	0	0.0896136	0.187539	0.242013	0.224661	0	0	0	0.318192	0	0.304678	0.212431	0.283429	0.473759	0.367782	0	0.402055	0.383735	0	0	0.323568	0	0	0.249154	0	0	0.205152	0.462894	0.182663	0	0	0.386162	0.413806	0.183964	0.173195	0.179831	0.302908	0.512628	0.421345	0.388386	0	0.382884	0.339805	0.178253
0.0825848	0	0	1.18454	0.725234	0.843488	0	0	0.718628	0.807904	0.547123	0	0	0	1.20183	0.86532	1.00525	0.619683	0.965844	0.293326	0.923955	0	0.989748	0.392539	0	0	1.69866	0	0	0.590994	0	0	0.67599	0.466191	1.25519	0	0	0.892029	0.898591	1.10965	0.603673	0.614805	0.89165	1.42132	0.514736	1.28283	0	0.799584	1.65149	0.954852
0.217111	0	0	0.36258	0.291713	0.210769	0	0	0.617868	0.438133	0.16351	0	0	0	0.537295	0.331392	0.595692	0.542764	0.414279	0.176034	0.436845	0	0.493962	0.447722	0	0	0.603943	0	0	0.307224	0	0	0.314107	0.682482	0.776765	0	0	0.451149	0.545947	0.576555	0.324362	0.400903	0.425927	0.71547	0.143806	0.608523	0	0.396729	0.387517	0.501562
0.620929	0	0	0.621808	0.174269	0.390944	0	0	0.403609	0.584548	0.475566	0	0	0	0.581982	0.716376	0.476021	0.641713	0.724787	1.49748	0.579086	0	0.286613	0.146295	0	0	0.980808	0	0	0.803274	0	0	0.691151	0.912718	1.1194	0	0	0.626199	0.792469	0.809583	0.268175	0.613254	0.920907	1.43595	0.86251	1.17058	0	0.805524	1.29399	0.316373
0.542313	0	0	0.440709	0.449864	0.49278	0	0	0.71744	0.693876	0.380712	0	0	0	0.783221	0.785192	0.748194	0.596937	0.708412	0.423323	0.789138	0	0.315633	0.443256	0	0	0.628576	0	0	0.821689	0	0	0.421266	0.639592	0.547806	0	0	0.104994	0.73186	0.853786	0.192838	0.740047	0.847627	0.832505	1.01349	0.943065	0	0.795195	0.497822	0.335783
0.620238	0	0	0.417574	0.793169	0.811511	0	0	1.05441	0.531312	0.25731	0	0	0	0.859246	1.52123	0.826837	0.423976	0.853178	0.405636	1.03813	0	0.994563	0.957458	0	0	0.759668	0	0	1.11279	0	0	0.200363	0.815126	1.17608	0	0	0.609438	1.14114	1.28429	0.448461	0.907445	1.0545	1.01584	0.47463	1.49413	0	0.634307	1.33053	0.364195
0.78673	0	0	0.720814	0.939994	0.254546	0	0	0.865428	0.340211	0.179573	0	0	0	0.423947	0.846005	0.770974	0.497144	0.781486	1.27279	1.0775	0	0.146506	0.453105	0	0	0.999147	0	0	1.26624	0	0	0.521639	0.664056	0.563294	0	0	0.801636	0.684802	1.13042	0.368615	0.699587	0.587943	1.05257	0.466313	1.10904	0	0.881837	1.15349	0.58951
0.495942	0	0	0.341506	0.699943	0.270286	0	0	0.736327	0.301022	0.122983	0	0	0	0.407241	0.54372	0.398645	0.780386	0.492266	0.369407	0.638396	0	0.395998	0.418194	0	0	0.766125	0	0	0.983226	0	0	0.328684	0.652185	0.808475	0	0	0.245099	0.517246	0.736274	0.178456	0.648453	0.498593	0.624331	0.348134	0.823886	0	0.441402	0.625076	0.546319
0.65695	0	0	0.657114	0.956017	0.533143	0	0	0.746288	0.499551	0.203396	0	0	0	1.10458	0.540043	0.465122	0.881374	0.940617	0.358384	0.594391	0	0.360172	0.537061	0	0	1.19065	0	0	0.953663	0	0	0.461083	1.58068	1.1505	0	0	0.152552	0.503916	0.895295	0.265038	0.757438	0.664014	0.724301	0.338782	0.814666	0	0.841334	0.938933	0.479339
0.752478	0	0	0.557282	0.822396	0.71619	0	0	0.895139	2.33956	0.302942	0	0	0	1.32931	0.683996	1.07881	0.895734	0.494128	0.40074	1.00174	0	0.412331	0.918405	0	0	0.90866	0	0	0.205718	0	0	1.12259	1.0212	1.01332	0	0	1.90854	0.840201	1.55449	0.542775	0.899267	1.48434	1.66788	1.28261	1.5616	0	1.0982	1.26105	0.584377
0.666345	0	0	0.321362	0.514051	0.382945	0	0	1.26775	0.885861	0.344975	0	0	0	0.982761	0.529848	0.77201	0.827838	0.6317	0	0.279437	0	0.490796	0.486923	0	0	0.787649	0	0	0.576872	0	0	0.500905	0.798811	1.15293	0	0.421732	0.329207	0.932578	1.00721	0.301626	0.416558	0.724242	0.976647	0.326539	1.38163	0	0.550063	0.735315	0.818424
0.358259	0	0	0.395048	1.0546	0.719357	0	0	0.662763	1.85619	0.397123	0	0	0	1.41374	0.801986	0.682548	1.24266	0.655229	0.110903	0.334922	0	1.04975	1.04825	0	0	1.05908	0	0	0.671292	0	0	0.751909	0.777723	1.24669	0	0	0.571083	1.19717	0.663969	0.0805339	0.904692	0.82293	1.5757	0.963421	1.4373	0	0.233041	0.948404	0.911124
0.127223	0	0	0.302036	0.299561	0.187052	0	0.0870543	0.32228	0.624557	0.252465	0	0	0	0.390815	0	0.238966	0.262101	0.319263	0.139988	0.439459	0	0.308056	0.260828	0	0	0.287306	0	0	0.138148	0	0	0.308356	0.324331	0.341363	0	0	0.509122	0.521154	0.319935	0.27582	0.318305	0.307651	0.368731	0.332873	0.299582	0	0.200842	0.366193	0.242293
0.721441	0	0	0.977286	1.18048	0.819129	0	0	1.02684	2.43951	0.32615	0	0	0	2.36393	1.21075	1.02766	0.892717	0.44441	0.319876	1.31525	0	0.425616	1.16217	0	0	0.661213	0	0	0.338103	0	0	1.39037	1.60599	1.1663	0	0	2.17449	1.0136	2.20333	0.294818	1.33592	1.21665	1.58537	1.13538	1.90113	0	0.448533	1.51955	0.272365
0.92564	0	0	1.0008	1.00093	0.715139	0	0	2.17842	0.679072	0.414292	0	0	0	0.605973	3.23153	0.771194	0.133273	1.81375	1.19066	1.28056	0	0.601322	1.16258	0	0	0.914395	0	0	2.66135	0	0	0.700581	2.06114	0.791202	0	0	2.17587	1.05077	3.02703	0.657048	1.41775	1.65005	1.71063	0.883581	1.99635	0	1.82143	2.93884	0.73298
1.21346	0	0	1.02539	0.952224	0.616797	0	0	2.07589	0.426387	0.88716	0	0	0	1.04149	3.79926	0.529329	0.875233	1.66904	1.14061	0.806868	0	1.16874	0.997538	0	0	1.77093	0	0	2.62888	0	0	1.21461	1.46376	1.23147	0	0	1.44664	1.29309	2.88089	0.500561	1.1406	0.61202	0.910425	0.58775	2.26969	0	1.68642	2.3088	1.17773
0.949839	0	0	1.24377	1.12318	0.864229	0	0	2.4198	1.03643	0.574206	0	0	0	1.58552	4.05209	0.96163	0.659141	1.27085	0.461418	1.62166	0	0.841404	1.27336	0	0	0.91175	0	0	2.40987	0	0	0.753653	1.31003	1.49283	0	0	1.11757	1.25908	3.39942	0.353206	1.61917	0.762874	0.804024	0.621165	1.98878	0	1.63186	2.70767	0.7353
1.18309	0	0	1.13563	0.796862	0.923939	0	0	2.17731	0.701542	0.391883	0	0	0	0.576335	3.71737	1.02251	0.344278	2.00118	1.55516	0.879329	0	1.17996	1.16556	0	0	1.30165	0	0	2.46739	0	0	1.12424	1.49359	1.12429	0	0	2.0531	0.693425	3.40602	0.615024	0.818628	1.26355	1.45775	0.645866	2.24834	0	1.87284	3.17998	0.697367
1.18463	0	0	1.17941	1.36908	0.502761	0	0	1.62294	2.06338	0.513631	0	0	0	1.065	2.96537	0.810644	0.396123	2.42533	2.00936	0.542799	0	1.36412	1.02425	0	0	0.303804	0	0	2.75499	0	0	1.82457	1.63585	0.767376	0	0	1.84824	1.00769	2.48621	0.564693	1.06921	1.97885	2.02626	0.928747	2.35715	0	1.98991	3.3874	0.792643
0.527882	0	0	1.24535	0.99998	0.562149	0	0	1.27918	2.19087	0.436863	0	0	0	2.05538	1.02188	0.848934	0.435719	0.797414	0.295122	1.01534	0	0.753365	0.836201	0	0	1.0527	0	0	0.586061	0	0	1.19196	0.668038	0.977229	0	0	1.04346	1.01075	1.16049	0.488349	0.697762	0.976838	2.29795	0.748982	1.43974	0	0.787636	1.4322	0.459927
0.58074	0	0	0.331122	0.487342	0.481257	0	0	1.11112	0.497742	0.156563	0	0	0	0.732372	0.52426	0.61826	0.307913	0.475157	0.314775	0.800524	0	0.434444	0.604167	0	0	1.03766	0	0	0.437632	0	0	0.552148	0.639876	0.262261	0	0	0.655974	0.806074	0.92206	0.472734	0.707242	0.571493	0.868422	0.491677	1.15393	0	0.328754	0.627076	0.186645
0.601849	0	0	0.936651	1.11545	0.529981	0	0	1.45903	0.530957	0.233848	0	0	0	0.856245	1.79918	0.68394	0.731993	1.21588	0.990945	0.641907	0	1.08227	0.68272	0	0	1.24223	0	0	1.20238	0	0	0.790877	1.78589	1.62486	0	0	0.898734	1.02649	1.52831	0.41527	0.877907	0.97004	1.00772	0.496663	1.21381	0	0.818134	1.26645	0.509985
0.286255	0	0	0.636077	0.545442	0.514026	0	0	0.645642	0.82964	0.211177	0	0	0	0.785783	1.10743	0.593846	0.756605	1.46577	1.23315	0.479204	0	0.541476	0.493767	0	0	1.1185	0	0	0.830794	0	0	1.16335	0.92198	1.28966	0	0	1.14665	0.603142	1.2415	0.400209	0.810037	1.30855	1.28681	1.18177	1.88579	0	0.930489	1.87184	0.861065
0.906008	0	0	0.928588	0.893897	0.737789	0	0	1.85506	1.06634	0.322399	0	0	0	0.627997	3.21459	1.07372	0.865388	1.98264	1.35605	1.17849	0	1.00706	1.09824	0	0	1.13396	0	0	2.61673	0	0	0.52011	2.00612	1.31913	0	0	1.4683	0.863812	2.89851	0.516344	1.08316	1.35931	1.33735	0.764545	2.10753	0	1.72274	2.581	0.735587
0.534139	0	0	0.54057	0.219812	0.438106	0	0	0.655008	0.625627	0.329265	0	0	0	0.808159	0.930162	0.282865	0.349325	0.611054	0.478217	0.475046	0	0.735419	0.489252	0	0	0.358353	0	0	0.751406	0	0	0.394811	0.712079	0.339388	0	0	0.3102	0.626789	0.800925	0.44515	0.392983	0.393817	0.782762	0.791895	0.833959	0	0.807093	0.648236	0.467961
0.642311	0	0	0.263577	0.804332	0.62808	0	0	0.973444	0.376204	0.111371	0	0	0	1.1346	1.41476	0.966285	0.180084	1.35345	2.60197	0.862752	0	1.18804	0.651117	0	0	0.966044	0	0	1.64753	0	0	1.06109	1.80551	0.873238	0	0	1.33563	0.607591	1.34238	0.260223	0.509371	0.953186	2.01086	0.52168	1.74464	0	1.28474	1.96668	0.710575
1.27195	0	0	0.799195	0.474516	0.583553	0	0	1.47707	1.74847	0.287058	0	0	0	2.01019	2.16498	1.29536	0.633881	1.80047	1.61966	0.914575	0	0.718246	1.21265	0	0	0.933919	0	0	2.07177	0	0	2.07385	2.03615	0.812374	0	0	3.65576	1.30617	3.4826	0.293188	1.55659	1.8898	1.64151	0.918731	4.01011	0	2.20101	1.26363	0.794781
1.02018	0	0	0.369637	0.615206	0.306244	0	0	1.31095	0.700374	0.384008	0	0	0	0.641279	1.77419	0.483566	0.358965	1.78665	1.98655	0.50313	0	0.993662	0.59665	0	0	0.658908	0	0	1.81097	0	0	1.2348	1.43057	0.373233	0	0	1.84112	0.523303	1.85627	0.236376	0.760047	1.31413	1.44481	0.518562	2.069	0	1.53557	1.74223	0.387937
0.366868	0	0	0.999248	0.324602	0.28246	0	0	1.50029	1.56633	0.351162	0	0	0	0.853964	1.5817	0.870415	0.599494	0.954213	0.265668	0.974017	0	0.202739	0.638448	0	0	0.594521	0	0	1.03093	0	0	0.487209	0.827829	0.824845	0	0	1.37158	0.83348	2.31798	0.430266	1.17642	0.83866	0.480883	0.519895	1.65553	0	0.884954	1.62584	0.373615
0.904428	0	0	0.367264	0.419448	0.473281	0	0	1.4622	1.12821	0	0	0	0	1.15615	0.946547	0.666085	0.365911	1.22508	0.994357	0.702946	0	0.620954	0.646085	0	0	0.432197	0	0	0.580321	0	0	1.36439	1.32122	0.86504	0	0	1.68645	0.775857	2.13931	0.245411	0.757371	0.621854	1.33062	0.585251	1.97083	0	1.24314	1.04357	0.327971
1.03009	0	0	0.601135	0.760992	0.519603	0	0	1.51781	1.54741	0.155444	0	0	0	1.37083	1.88859	1.04087	1.16822	1.24033	2.04073	1.1745	0	0.771071	0.701586	0	0	1.16246	0	0	0.928956	0	0	1.10212	1.6123	1.08512	0	0	2.2074	1.02999	2.24507	0.524526	0.866078	0.961882	1.49782	1.11701	2.91368	0	1.35021	2.74577	1.04633
0.3449	0	0	0.426976	0.607697	0.261498	0	0	0.64656	0.793725	0.138896	0	0	0	1.11356	0.34921	0.315451	0.467327	0.31815	0.305149	0.424313	0	0.455444	0.653531	0	0	0.805325	0	0	0.496387	0	0	0.81637	0.542511	0.88521	0	0	0.378744	0.613764	0.366307	0.204939	0.468771	0.692728	0.964787	0.557689	0.879761	0	0.421495	0.634817	0.579207
0.840095	0	0	0.39302	0.628688	0.510417	0	0	1.14814	1.33243	0.277085	0	0	0	0.804253	0.767375	0.778811	0.537684	0.693271	0.294143	0.572835	0	0.413523	0.771319	0	0	0.524868	0	0	0.388281	0	0	1.21724	0.538097	0.777935	0	0	1.51557	0.67117	1.5421	0.17327	0.623386	0.803147	1.1555	0.649854	0.99564	0	0.709195	1.39735	0.106924
0.417333	0	0	0.369423	0.246087	0.323695	0	0	0.310874	0.333609	0.393048	0	0	0	0.451692	0.308304	0.230208	0.4569	0.648316	0.664607	0.704023	0	0.336786	0.449753	0	0	0.370013	0	0	0.480173	0	0	0.212555	0.661925	0.412101	0	0	0.371476	0.714972	0.32114	0.186484	0.550228	0.543693	0.756961	0.669144	0.563072	0	0.761679	0.480739	0.261671
1.4021	0	0	0.497447	0.656903	0.43624	0	0	1.09056	1.58163	0.366624	0	0	0	0.974399	1.10149	0.865753	0.380516	1.48201	1.96039	0.659952	0	0.673298	0.720866	0	0	0.723388	0	0	0.879095	0	0	1.91427	0.899276	0.81102	0	0	1.93048	0.671406	1.58103	0.320971	0.567555	1.36322	1.59348	0.562483	1.72487	0	1.18455	2.17994	0.30652
0.949139	0	0	0.991429	0.845916	1.09896	0	0	2.49604	0.334942	0.500395	0	0	0	1.07268	3.92991	0.628239	1.04446	1.4592	0.645735	1.22436	0	1.14173	1.12648	0	0	1.79883	0	0	2.24099	0	0	0.787372	1.21066	1.44155	0	0	1.32005	1.15996	2.95928	0.358743	1.2258	0.833573	0.992983	0.437575	2.02901	0	1.11074	2.2638	0.797436
0.561685	0	0	0.469842	0.618173	0.377271	0	0	0.732391	0.392617	0.391683	0	0	0	0.683846	2.33408	0.359353	0.35992	0.889824	0.944077	0.257914	0	0.961839	0.502183	0	0	0.553467	0	0	2.12017	0	0	0.490026	1.28247	0.388634	0	0	1.10128	0.24505	1.79363	0.305303	1.08359	0.79367	0.798104	0.695085	1.35067	0	1.26349	1.30203	0.514595
0.675581	0	0	0.725615	0.492492	0.485066	0	0	1.31829	0.824766	0.208639	0	0	0	0.770954	1.8914	0.474929	0.725817	1.214	1.39365	0.771547	0	0.738238	0.551435	0	0	0.7438	0	0	1.63972	0	0	0.724972	1.30293	0.419081	0	0	1.26034	0.628659	1.86953	0.160005	0.919793	0.590957	0.868026	0.298381	1.81157	0	1.29538	1.19654	0.477322
1.01159	0	0	0.927395	0.415851	0.610149	0	0	1.91063	2.14326	0.138019	0	0	0	1.74037	2.72272	1.23358	0.915874	1.66991	1.04939	1.06291	0	0.495411	0.980457	0	0	1.16506	0	0	1.4002	0	0	1.55729	1.30958	1.5023	0	0	2.75267	1.26813	3.81063	0.521209	1.41898	1.08425	1.05676	0.833424	3.10392	0	1.67973	1.79911	0.407557
1.45256	0	0	0.504726	1.16745	0.532939	0	0	1.70075	2.53485	0.251865	0	0	0	1.54311	1.84574	1.07627	0.906171	1.64527	2.05808	0.622521	0	1.10696	1.70235	0	0	1.15939	0	0	1.55152	0	0	2.31972	1.48144	0.818792	0	0	3.01615	1.45767	2.06594	0.462342	0.699165	2.2281	2.68791	1.29461	2.66503	0	1.14848	2.38796	1.03576
0.746626	0	0	0.376527	0.541597	0.617366	0	0	1.12094	1.55304	0.169439	0	0	0	1.1554	0.633204	0.686884	0.879471	0.922247	0.733295	0.348153	0	0.87855	0.827977	0	0	0.925418	0	0	0.251611	0	0	1.17585	1.21555	1.32395	0	0	1.43695	0.911989	1.25101	0.103664	0.727791	1.4141	1.62613	1.29352	2.22828	0	0.867409	1.44402	0.53886
0.235583	0	0	0.524129	0.288334	0.509222	0	0	0.603006	0.687726	0.193215	0	0	0	0.676903	0.509407	0.571022	0.419737	0.599008	0.182362	0.557445	0	0.588711	0.588296	0	0	0.683834	0	0	0.486047	0	0	0.54605	0.648728	0.814621	0	0	0.420694	0.39168	0.778846	0.233373	0.305804	0.81458	0.757823	0.288904	0.707445	0	0.69896	0.570915	0.58669
0.370048	0	0	0.232418	0.209664	0.102532	0	0	0.245791	0.15485	0.290991	0	0	0	0.711803	0.981719	0.154067	0.35842	0.0839931	0.133581	0.217804	0	0.326222	0.257458	0	0	0.324378	0	0	1.00336	0	0	0.303824	0.390248	0.149111	0	0	0.0882139	0.142059	0.539984	0.229148	0.395408	0.222351	0.104744	0.312181	0.194945	0	0.110044	0.338173	0.236237
0.25983	0	0	0.143156	0.217424	0.151437	0	0	0	0.236646	0.0667396	0	0	0	0.405367	0.178978	0.174433	0.283415	0.239832	0.0592249	0.0729068	0	0.256866	0.283197	0	0	0.207057	0	0	0.516463	0	0	0.153586	0.291994	0.274722	0	0	0.171001	0.171186	0.299232	0.0810639	0.141041	0.287913	0.243952	0.279978	0.176101	0	0.265207	0.308647	0.19582
0.189802	0	0	0.134978	0.0643208	0.0337773	0	0	0.150089	0.096919	0.19263	0	0	0	0.356514	0.14138	0.0860573	0.311498	0.192426	0.125965	0.0905718	0	0.219385	0.135212	0	0	0.327442	0	0	0.336091	0	0	0.218485	0.244146	0.253207	0	0	0.208844	0.153295	0.298025	0.202115	0.356086	0.240381	0.109011	0.239675	0.21698	0	0.226624	0.271724	0.205496
0.143177	0	0	0.0824249	0.0914826	0.134074	0	0.362743	0.126687	0.0509856	0.175755	0	0	0	0.222183	0	0.0845113	0.15363	0.120152	0.141808	0.168187	0	0.165082	0.100771	0	0	0.215198	0	0	0.268309	0	0	0.215247	0.0987582	0.0937441	0	0	0.122435	0.148345	0.114063	0.0978452	0.189465	0.0817496	0.235118	0.133066	0.0961307	0	0.230539	0.131836	0.142111
0.447065	0	0	0.126093	0.184046	0.195462	0	0	0.293071	0.230668	0.11148	0	0	0	0.627022	0.299406	0.27046	0.359079	0.282433	0.0946983	0.251482	0	0.317102	0.148296	0	0	0.375759	0	0	0.545471	0	0	0.245916	0.537973	0.330963	0	0	0.176637	0.317089	0.363151	0.35558	0.277187	0.285711	0.299893	0.451485	0.271778	0	0.260153	0.310377	0.462987
0.288881	0	0	0.213699	0.303444	0.196696	0	0	0.208524	0.259217	0.317584	0	0	0	0.435415	0.245434	0.240582	0.283208	0.329891	0.383698	0.161608	0	0.553443	0.448121	0	0	0.357259	0	0	0.415259	0	0	0.114851	0.361473	0.4445	0	0	0.250648	0.185612	0.293816	0.159142	0.275587	0.416737	0.324672	0.373456	0.355596	0	0.410848	0.452381	0.255994
0.417658	0	0	0.469292	0.167015	0.572964	0	0	0.442512	0.508507	0.622377	0	0	0	0.934186	0.407989	0.730302	0.657281	0.394686	0	0.439843	0	0.39098	0.708743	0	0	0.521521	0	0	0.301997	0	0	0.320668	0.394327	0.455224	0	0.272977	0.476068	0.510223	0.562007	0.1416	0.410424	0.601113	0.416053	0.636281	0.430318	0	0.496528	0.47772	0.410174
0.401094	0	0	0.558089	0.214555	0.547674	0	0	0.901036	0.836654	0.645755	0	0	0	0.719301	1.00915	0.495354	0.425763	0.629939	0.335336	1.10154	0	0.97444	0.738643	0	0	0.634893	0	0	0.959105	0	0	0.713506	0.736811	0.263445	0	0	0.445146	0.945386	0.708261	0.486642	0.507821	0.578579	0.64326	1.02479	0.557645	0	0.703963	1.02804	0.462214
0.23766	0	0	0.19449	0.179041	0.264532	0	0.0712029	0.238756	0.263469	0.327532	0	0	0	0.415535	0	0.244731	0.235732	0.281115	0.32421	0.381203	0	0.326809	0.327395	0	0	0.262169	0	0	0.284475	0	0	0.323943	0.331278	0.218929	0	0	0.21647	0.394568	0.130287	0.23289	0.276728	0.357637	0.437679	0.56043	0.311973	0	0.377661	0.328036	0.270241
0.485551	0	0	0.374842	0.238009	0.162218	0	0	0.438165	0.320619	0.392501	0	0	0	0.488618	0.441856	0.26976	0.503588	0.459493	0.68777	0.822588	0	0.389239	0.464243	0	0	0.40421	0	0	0.376973	0	0	0.313973	0.565445	0.716545	0	0	0.561927	0.963258	0.49285	0.375063	0.299798	0.737144	0.643383	0.543256	0.638086	0	0.558971	0.648139	0.359735
0.209051	0	0	0.456646	0.310255	0.485023	0	0	0.76216	0.790598	0.29071	0	0	0	0.896645	0.342179	0.626024	0.281424	0.57225	0	0.640767	0	0.71448	0.428286	0	0	0.582672	0	0	0.309185	0	0	0.442965	0.501116	0.516565	0	0.114042	0.615045	0.42275	0.819527	0.516776	0.589766	0.295249	0.495294	0.653526	0.688375	0	0.559257	0.368026	0.547455
0.1954	0	0	0.441711	0.675241	0.548389	0	0	0.507628	1.2478	0.288009	0	0	0	0.737957	0.4131	0.396852	0.711925	0.467778	0.0495507	0.900995	0	0.484971	0.344929	0	0	1.09796	0	0	0.415604	0	0	0.623711	0.612874	0.965546	0	0	0.545103	0.770524	0.938736	0.247733	0.630418	0.895366	0.945946	0.519047	0.867096	0	0.759103	0.984845	0.380384
0.118768	0	0	0.348296	0.272375	0.296589	0	0	0.27574	0.570309	0.259937	0	0	0	0.389519	0.217947	0.413276	0.364324	0.473593	0.713986	0.710339	0	0.318125	0.207695	0	0	0.309855	0	0	0.484153	0	0	0.356496	0.41607	0.415327	0	0	0.359872	0.628688	0.417973	0.359632	0.525232	0.488194	0.536111	0.408198	0.43041	0	0.508264	0.624016	0.0932427
0.612767	0	0	0.499171	0.489328	1.04896	0	0	1.02059	0.621892	0.625008	0	0	0	0.55241	0.675056	0.596556	0.324323	0.823795	0.0595778	1.00538	0	0.855597	0.859457	0	0	1.06736	0	0	0.558454	0	0	0.0308346	0.489967	1.42567	0	0	0.532009	0.862747	1.48698	0.265548	0.642954	0.920987	0.175774	0.687858	0.979255	0	0.947429	1.01545	0.596207
0.561532	0	0	0.366614	0.392841	0.613986	0	0	0.480814	0.245977	0.0743959	0	0	0	0.446587	0.497808	0.570449	0.473373	0.618628	0	0.850115	0	0.652427	0.460803	0	0	0.755471	0	0	0.755866	0	0	0.4369	0.617487	0.537518	0	0	0.489221	0.653792	1.06544	0.168758	0.651971	0.634035	0.65246	0.504907	1.03747	0	0.508973	0.342881	0.10962
1.23608	0	0	1.24465	0.986831	0.682469	0	0	1.10866	0.60749	0.549321	0	0	0	0.630415	1.64987	1.03358	1.39988	1.5928	1.26822	1.95979	0	1.0727	1.5675	0	0	1.82961	0	0	2.85115	0	0	0.362864	1.3517	0.974279	0	0	0.819834	1.15938	1.67685	0.667254	0.809081	1.00694	1.09017	1.08126	1.14655	0	1.4111	1.56821	1.17995
0.615975	0	0	0.594958	0.719629	0.801902	0	0	0.676349	0.599845	0.210853	0	0	0	1.24508	0.366712	0.561064	0.972211	0.932601	0.389633	0.759461	0	0.549496	0.708828	0	0	1.10446	0	0	1.40445	0	0	0.369694	1.74436	1.06303	0	0	0.22806	0.457437	1.15025	0.270198	0.80042	0.642828	0.692002	0.41443	0.759215	0	0.8768	0.94503	0.571875
0.990542	0	0	0.5244	0.821186	0.726417	0	0	1.45961	1.92519	0.305867	0	0	0	1.40736	1.06665	1.68588	1.01734	0.00297143	0.938881	1.32282	0	0.49548	1.09458	0	0	1.34776	0	0	0.37153	0	0	1.02311	1.19688	0.970116	0	0	2.07636	0.857324	1.68255	0.529622	1.1292	1.38967	2.04643	1.42165	2.05142	0	1.01647	1.35578	0.711119
0.574084	0	0	0.265067	0.383065	0.386753	0	0	0.844814	0.369032	0.308708	0	0	0	0.764786	0.165149	0.491094	0.861893	0.485461	0.180429	0.0324452	0	0.488041	0.41649	0	0	0.669907	0	0	0.589339	0	0	0.599549	0.807687	0.712569	0	0	0.313375	0.472035	0.714237	0.352405	0.201788	0.481408	1.02989	0.268788	1.05485	0	0.486631	0.575399	0.564552
0.552723	0	0	1.2279	0.902441	1.10317	0	0	1.53721	1.54807	0.742072	0	0	0	1.82962	1.31607	1.00688	1.2924	0.991183	0	0.882053	0	1.15992	0.976127	0	0	1.47975	0	0	1.15389	0	0	0.574171	1.1577	1.49822	0	0.177382	0.579886	1.67145	1.32292	0.441868	1.67992	0.697551	1.22692	0.256952	1.95648	0	0.998484	1.69284	1.05561
0.453248	0	0	0.626704	0.321643	0.536109	0	0	0.415719	0.565317	0.25784	0	0	0	0.717963	0.180015	0.642931	0.534799	0.533941	0	0.819074	0	0.411593	0.590964	0	0	0.71271	0	0	0.290387	0	0	0.521016	0.177643	0.588208	0	0.0821358	0.487103	0.528944	0.51804	0.0824706	0.529148	0.733535	0.652668	0.464509	0.681975	0	0.58844	0.52207	0.538223
0.706937	0	0	0.47758	0.971903	0.477769	0	0	0.719098	1.40526	0.244361	0	0	0	1.52879	0.856962	0.729775	0.721425	0.394827	0.378257	0.7876	0	0.531235	0.904141	0	0	0.743445	0	0	0.470474	0	0	0.815238	1.29389	0.740282	0	0	1.49389	0.780952	1.23934	0.186692	0.914914	0.875391	1.37587	0.883029	1.38447	0	0.254664	0.633116	0.403864
1.11563	0	0	1.0518	0.996656	0.501176	0	0	2.18149	1.33812	0.328057	0	0	0	0.579726	2.38889	0.998784	0.303694	2.0981	1.34251	0.908309	0	0.625263	0.959811	0	0	0.54169	0	0	2.13998	0	0	1.32578	1.87563	0.632825	0	0	2.71657	0.914192	2.90114	0.771646	1.14769	2.16861	2.02695	0.947486	2.15947	0	2.07509	3.09239	0.707027
0.856384	0	0	0.559571	0.627764	0.598627	0	0	2.0876	0.668426	0.292895	0	0	0	1.09763	2.05719	0.852273	0.628436	1.27439	0.0551727	0.95406	0	0.511761	0.639954	0	0	1.10189	0	0	0.846693	0	0	1.13379	1.29652	1.31222	0	0	1.66673	0.997623	2.77434	0.302286	1.01245	0.404577	0.654213	0.609371	2.24261	0	1.31943	1.33662	0.503138
0.959558	0	0	0.374188	0.437609	0.406347	0	0	1.22871	0.919523	0.0926009	0	0	0	0.544784	2.05185	0.238939	0.236526	1.8029	1.97083	0.233785	0	1.05644	0.623002	0	0	0.590111	0	0	1.96359	0	0	0.977415	1.49412	0.565021	0	0	1.25809	0.182773	1.99264	0.203448	0.336931	0.769226	1.21062	0.55793	2.02409	0	1.77642	1.57021	0.310879
0.792319	0	0	0.785533	0.6912	0.586959	0	0	1.85463	0.738303	0.374637	0	0	0	0.918036	2.44778	1.02086	0.589799	1.08479	0.511751	1.03254	0	0.568049	0.749915	0	0	0.867516	0	0	1.33023	0	0	0.831444	1.24565	0.970488	0	0	1.73261	0.705461	2.94204	0.273977	1.19315	1.00124	0.872617	0.642816	2.07291	0	1.2536	2.08763	0.2834
0.870224	0	0	0.311584	0.651373	0.491686	0	0	1.20878	1.61302	0.177541	0	0	0	1.33323	1.26876	1.05431	0.149144	2.15879	2.36818	0.733975	0	1.01005	1.07552	0	0	0.822756	0	0	1.24089	0	0	1.68359	1.44819	1.16214	0	0	1.56816	0.640362	1.66198	0.276278	0.211418	1.3006	2.15834	0.295799	2.1416	0	1.56616	2.07899	0.625023
0.447264	0	0	0.787365	0.785497	0.404275	0	0	0.682871	1.15106	0.427324	0	0	0	0.901694	0.2592	0.666868	0.471156	0.357461	1.1389	0.69617	0	0.598088	0.45764	0	0	0.858724	0	0	0.565255	0	0	0.937442	0.906176	0.991486	0	0	0.73399	0.551255	0.573329	0.245171	0.67241	0.620722	1.46541	0.328559	1.09565	0	0.714029	0.802405	0.395782
0.35041	0	0	0.229861	0.0951054	0.303266	0	0	0.428593	0.523299	0.208947	0	0	0	0.491219	0.299299	0.420435	0.465721	0.425543	0.546305	0.460634	0	0.412448	0.231093	0	0	0.390256	0	0	0.432203	0	0	0.334279	0.763701	0.495506	0	0	0.340815	0.429802	0.585955	0.263618	0.409682	0.519822	0.628521	0.646136	0.869873	0	0.46557	0.459156	0.205656
0.447375	0	0	1.0296	0.831106	0.663209	0	0	1.10684	0.621436	0.163154	0	0	0	1.02518	1.38236	0.793781	0.799011	0.934773	0.75027	0.686728	0	0.822437	0.64105	0	0	1.0962	0	0	0.909033	0	0	0.696243	1.3655	1.13769	0	0	0.810987	0.591265	1.27297	0.111204	0.371036	0.77153	1.15657	0.266092	1.53513	0	1.0512	1.05914	0.680615
0.729865	0	0	0.835061	0.804199	0.65383	0	0	1.27344	1.28945	0.227239	0	0	0	1.51972	1.4343	1.26232	1.10616	1.8889	1.07067	0.82387	0	1.04292	0.807415	0	0	1.30636	0	0	0.897016	0	0	0.989519	0.750865	1.36354	0	0	1.56031	1.294	1.64267	0.365179	0.68041	0.956209	1.39426	0.736708	2.17354	0	1.08222	2.33538	1.18782
0.934531	0	0	0.444957	0.643749	0.726077	0	0	1.78487	0.805947	0.172077	0	0	0	0.95031	2.39916	1.03286	0.343042	1.78894	1.18214	1.05733	0	0.4986	1.27909	0	0	1.29599	0	0	1.85427	0	0	1.20758	1.52523	1.39052	0	0	1.79201	0.833813	2.68648	0.528248	0.801334	0.945328	1.55596	0.901829	2.05102	0	1.39178	1.80448	0.436969
0.501947	0	0	0.440572	0.423708	0.313543	0	0	0.781573	0.669812	0.317554	0	0	0	0.530736	1.25164	0.310093	0.376879	0.550948	0.370059	0.566398	0	0.579116	0.698937	0	0	0.683029	0	0	0.74413	0	0	0.333601	0.748708	0.699478	0	0	0.552284	0.749591	0.992927	0.426313	0.638911	0.685624	0.637136	0.779074	0.881725	0	0.75399	0.743653	0.212534
0.749447	0	0	0.227357	0.659003	0.633512	0	0	0.912326	0.546585	0.0581542	0	0	0	0.807512	0.529809	0.547638	0.273837	0.786715	0.533202	0.776313	0	0.663481	0.443703	0	0	0.379284	0	0	0.727904	0	0	0.739151	1.2208	0.725017	0	0	0.866308	0.833773	0.993641	0.276576	0.699661	1.11657	1.46279	0.67218	0.953899	0	0.991181	1.26892	0.495066
0.799046	0	0	0.330378	0.745385	0.0542996	0	0	1.41525	1.46178	0.431351	0	0	0	1.1501	1.0008	1.14142	0.50629	0.865918	0.414583	1.01234	0	0.672925	0.767228	0	0	0.711217	0	0	0.496843	0	0	1.37344	1.42309	1.21955	0	0	2.26481	1.18669	2.06932	0.225202	1.17255	1.85463	1.34033	0.947079	2.56782	0	0.794022	1.41787	0.615712
1.01638	0	0	0.369005	0.643786	0.21473	0	0	0.922984	0.930713	0.14118	0	0	0	0.578893	1.54396	0.664122	0.178863	1.74955	1.93924	0.165342	0	0.958726	0.718544	0	0	0.433526	0	0	1.99183	0	0	0.84903	1.56761	0.258534	0	0	2.01992	0.309281	1.86662	0.28045	0.606889	1.1469	1.68722	0.783381	2.23415	0	1.71729	1.59082	0.41425
0.660639	0	0	1.00611	0.427604	0.349813	0	0	1.68789	1.54093	0.28035	0	0	0	1.05811	1.20076	1.08971	0.572243	0.897931	1.06342	0.762145	0	0.546574	0.697237	0	0	0.846008	0	0	0.858905	0	0	0.815872	1.07037	0.550745	0	0	1.91458	0.693984	2.10778	0.47885	1.0192	1.20583	0.873097	0.415747	2.08465	0	1.17785	1.69568	0.170088
1.16288	0	0	0.806486	0.735731	0.601695	0	0	1.94624	2.0866	0.0536879	0	0	0	1.54558	1.26906	1.00455	0.405235	1.43041	1.30262	1.18042	0	0.784885	0.941158	0	0	0.789628	0	0	0.540211	0	0	2.18424	1.34441	1.46513	0	0	2.46412	1.19656	2.97202	0.353673	0.971456	0.849155	1.67534	0.849191	2.70533	0	1.63203	1.75838	0.431291
0.603378	0	0	0.555137	0.663696	0.513099	0	0	0.958711	1.57897	0.342026	0	0	0	0.89782	1.20218	0.470784	0.780649	0.694019	0.978411	0.881148	0	0.477103	0.563248	0	0	0.759457	0	0	0.478772	0	0	1.10171	0.736344	0.859422	0	0	1.23841	0.842505	1.32772	0.180207	0.65094	1.25715	1.12346	0.559693	1.75556	0	0.562398	1.89951	0.449927
0.573045	0	0	0.112936	0.862217	0.269322	0	0	1.23162	0.629681	0.281709	0	0	0	1.45319	0.538899	0.696431	0.468288	0.368777	0.169812	0.607532	0	0.614453	1.11356	0	0	0.709423	0	0	0.53595	0	0	0.953688	0.689552	1.05408	0	0	0.975622	0.838871	0.802907	0.103142	0.51528	0.936448	1.45164	0.60462	1.49135	0	0.559468	0.592861	0.698774
0.680849	0	0	0.265185	0.762052	0.463978	0	0	0.92138	1.4427	0.320306	0	0	0	0.842442	0.489281	0.982741	0.404748	0.978252	0.492042	0.533647	0	0.584	1.0394	0	0	0.570682	0	0	0.497066	0	0	1.36921	0.902152	0.74287	0	0	1.5034	0.660379	1.27737	0.260747	0.601402	0.836374	1.81583	0.944491	1.12309	0	0.980545	1.1642	0.445032
0.402572	0	0	0.236694	0.296635	0.284958	0	0	0.524868	0.47274	0.681955	0	0	0	0.693508	0.141513	0.5182	0.475596	0.676421	0.49932	0.75377	0	0.683679	0.695964	0	0	0.694117	0	0	0.538362	0	0	0.290306	0.65391	0.73823	0	0	0.662139	0.681049	0.33866	0.123828	0.416103	0.490408	0.564573	0.696611	0.463117	0	0.58677	0.512092	0.379033
1.62371	0	0	0.222586	0.822581	0.592191	0	0	1.3744	1.66422	0.220151	0	0	0	1.68518	1.1228	1.12699	0.700353	0.960042	0.649497	0.617019	0	0.749142	1.01046	0	0	0.516489	0	0	0.656572	0	0	2.03806	1.3756	0.826771	0	0	1.77384	0.614665	1.64887	0.23423	0.664446	1.56323	1.74183	0.78713	1.4985	0	0.886787	1.39288	0.298004
0.865878	0	0	0.691654	0.715766	0.71362	0	0	2.19317	0.358272	0.514816	0	0	0	0.745492	2.831	0.710564	0.765894	0.979097	0.302018	1.35335	0	0.686997	0.858163	0	0	1.34933	0	0	1.4224	0	0	0.608578	0.73578	1.29178	0	0	1.21551	1.15447	2.51792	0.433867	1.01982	0.535197	0.634171	0.467419	1.71679	0	0.730717	2.22165	0.666301
0.488672	0	0	0.958028	0.882456	0.525069	0	0	1.85837	0.839553	0.323895	0	0	0	1.35173	2.67767	1.07453	0.465751	1.06296	0	1.10468	0	0.807187	1.05906	0	0	0.55873	0	0	1.78758	0	0	0.631177	1.83841	0.90817	0	0.104939	2.42351	1.03241	3.48828	0.533712	1.717	1.12674	1.00046	0.765147	2.26885	0	1.59537	1.65972	0.838455
0.691897	0	0	0.306426	0.323235	0.440443	0	0	1.12794	0.790321	0.136678	0	0	0	1.02628	1.25822	0.735945	0.477064	1.26424	1.91054	0.588461	0	0.761286	0.610178	0	0	0.66099	0	0	1.27404	0	0	1.12362	1.21587	0.375373	0	0	1.67123	0.443104	1.6889	0.015679	0.421856	0.623751	1.26767	0.393878	1.92879	0	1.33702	1.30568	0.375084
0.829731	0	0	0.500352	0.437857	0.486681	0	0	1.25737	1.04067	0.176228	0	0	0	0.878704	2.31874	0.588007	0.542834	1.24199	0.891587	0.889421	0	0.26861	0.672113	0	0	0.791332	0	0	1.47094	0	0	0.895595	1.05082	0.914274	0	0	1.44975	0.871041	2.29836	0.441605	0.774904	0.930965	1.02535	0.737419	1.73016	0	1.09504	1.68877	0.363959
1.39697	0	0	0.530971	1.01755	0.516727	0	0	1.6267	2.58568	0.295119	0	0	0	0.701116	1.71224	0.995805	0.769741	1.94511	1.31072	0.783412	0	1.0009	1.26434	0	0	0.713423	0	0	1.3208	0	0	1.90843	1.37317	0.964134	0	0	2.25351	1.24885	2.05712	0.49143	0.893371	2.44785	2.23601	1.23407	2.05267	0	1.00934	2.71838	0.631945
0.698633	0	0	0.487661	0.718598	0.512526	0	0	1.11687	1.09863	0.287591	0	0	0	1.23737	0.370257	0.902673	0.748296	1.12255	1.20076	0.479936	0	0.802614	0.588145	0	0	0.829198	0	0	0.145597	0	0	1.03423	0.933669	1.29073	0	0	1.35934	0.815382	0.959487	0.338479	0.722225	1.04259	1.75128	0.710292	1.85045	0	0.836589	1.4266	0.657866
0.23718	0	0	0.238456	0.402524	0.486886	0	0	0.578964	0.53682	0.124985	0	0	0	0.688406	0.566741	0.118678	0.253497	0.481981	0.740665	0.426952	0	0.635948	0.431581	0	0	0.333479	0	0	0.674968	0	0	0.600989	0.839642	0.56458	0	0	0.33267	0.48726	0.620131	0.12269	0.236563	0.420777	0.973223	0.653879	0.709394	0	0.970343	0.679153	0.483276
0.342993	0	0	0.178504	0.203524	0.0608703	0	0	0.257131	0.144345	0.232411	0	0	0	0.656607	0.902383	0.125311	0.347943	0.0894406	0.130908	0.211012	0	0.28899	0.207884	0	0	0.366758	0	0	0.948966	0	0	0.250704	0.381917	0.149322	0	0	0.126733	0.193493	0.520102	0.272186	0.385239	0.236679	0.0886777	0.310478	0.167158	0	0.123819	0.315171	0.233872
0.213897	0	0	0.187236	0.212005	0.160444	0	0.0502946	0.246097	0.381847	0.0823675	0	0	0	0.303452	0	0.0548565	0.108739	0.148244	0.0135262	0.0261008	0	0.233466	0.163611	0	0	0.19021	0	0	0.378617	0	0	0.16843	0.28017	0.149967	0	0	0.0824023	0.149402	0.217912	0.157195	0.294065	0.243527	0.178638	0.383149	0.214148	0	0.320614	0.305181	0.186134
0.150894	0	0	0.209811	0.167281	0.0361658	0	0.0435535	0.242379	0.143192	0.125867	0	0	0	0.278054	0	0.0778037	0.210898	0.152618	0.180291	0	0	0.247206	0.12439	0	0	0.22444	0	0	0.31951	0	0	0.192557	0.313544	0.211477	0	0	0.142945	0.164301	0.201431	0.10452	0.258206	0.188886	0.167785	0.16969	0.169318	0	0.231541	0.213932	0.231249
0.244076	0	0	0.035955	0.079692	0.119341	0	0.265911	0.210672	0.0993579	0.254239	0	0	0	0.329333	0	0.0806587	0.254125	0.157914	0.0886547	0.198773	0	0.152818	0.120772	0	0	0.291494	0	0	0.269124	0	0	0.278989	0.158697	0.199051	0	0	0.212336	0.224696	0.189882	0.05487	0.275609	0.141426	0.172252	0.159296	0.14718	0	0.253167	0.141395	0.138355
0.359084	0	0	0.173494	0.168365	0.23575	0	0	0.254027	0.220725	0.301903	0	0	0	0.287808	0.326366	0.222868	0.361962	0.180537	0.177491	0.135042	0	0.299196	0.0786858	0	0	0.378378	0	0	0.490702	0	0	0.189865	0.271673	0.26829	0	0	0.192332	0.216255	0.307865	0.113148	0.435822	0.386072	0.246404	0.3108	0.314901	0	0.245083	0.209713	0.323853
0.273895	0	0	0.225525	0.184944	0.222851	0	0	0.243077	0.388583	0.197467	0	0	0	0.334046	0.0822452	0.132827	0.131354	0.35002	0.239177	0.286056	0	0.519096	0.419229	0	0	0.30893	0	0	0.536052	0	0	0.239718	0.491934	0.333833	0	0	0.118141	0.173104	0.246374	0.20365	0.393129	0.461507	0.529424	0.39248	0.201917	0	0.626317	0.467758	0.178593
0.483002	0	0	0.252182	0.221584	0.48515	0	0	0.460432	0.364671	0.272118	0	0	0	0.528468	0.321536	0.356878	0.515487	0.362941	0.393551	0.21196	0	0.776786	0.243275	0	0	0.37448	0	0	0.56359	0	0	0.365319	0.760207	0.455284	0	0	0.411126	0.273387	0.196	0.181444	0.284784	0.406637	0.395065	0.604555	0.457057	0	0.525086	0.355093	0.536545
0.373496	0	0	0.390849	0.324234	0.306879	0	0	0.377172	0.726564	0.673583	0	0	0	0.301371	0.537428	0.335408	0.367072	0.510135	0.160311	0.695692	0	0.62939	0.623798	0	0	0.134309	0	0	0.449413	0	0	0.429007	0.618623	0.639077	0	0	0.605568	0.766237	0.541365	0.14954	0.555261	0.591213	0.405295	1.18793	0.449046	0	0.504404	0.988853	0.451968
0.246333	0	0	0.247608	0.152406	0.312636	0	0.0565938	0.278726	0.241021	0.2063	0	0	0	0.418734	0	0.256815	0.170777	0.203635	0.322979	0.117266	0	0.499623	0.344058	0	0	0.25699	0	0	0.325731	0	0	0.350402	0.264004	0.198862	0	0	0.349251	0.231968	0.17913	0.150951	0.194588	0.329518	0.500163	0.419016	0.397779	0	0.3437	0.333062	0.28918
0.594556	0	0	0.531826	0.342311	0.397075	0	0	0.65419	0.568759	0.355906	0	0	0	0.791739	0.602206	1.20392	0.486564	0.57331	0.06715	0.710288	0	0.711086	0.86094	0	0	0.397198	0	0	0.440348	0	0	0.542015	0.663977	0.669321	0	0	0.634097	0.759034	0.578167	0.342807	0.129353	0.6656	0.789039	0.841632	0.741541	0	0.670988	0.546939	1.0882
0.452409	0	0	0.278782	0.189505	0.510272	0	0	0.670121	0.310294	0.318205	0	0	0	0.554737	0.361035	0.563638	0.645157	0.305777	0.417005	0.74221	0	0.456936	0.490187	0	0	0.547761	0	0	0.328849	0	0	0.395647	0.549045	0.684457	0	0	0.483738	0.825813	0.823092	0.29523	0.305155	0.511835	0.469781	0.520035	0.829706	0	0.46374	0.274909	0.314132
0.35559	0	0	0.252031	0.431965	0.472486	0	0	0.508144	0.523324	0.339286	0	0	0	0.544804	0.21922	0.491105	0.58192	0.639017	1.02858	0.847065	0	0.507467	0.39196	0	0	0.593069	0	0	0.52651	0	0	0.595369	0.969701	0.823456	0	0	0.725171	0.686339	0.681204	0.184435	0.564833	0.918581	1.13796	0.618029	0.876573	0	0.778415	0.503297	0.460145
0.29424	0	0	0.849535	0.601076	0.610535	0	0	0.770786	0.429676	0.504767	0	0	0	0.530625	0.864755	0.629506	0.608204	0.556245	0.892636	1.1087	0	0.525485	0.447157	0	0	1.15507	0	0	0.921936	0	0	0.62813	0.440377	0.82107	0	0	0.693701	1.11399	0.792784	0.317937	0.634304	0.8271	0.756398	0.378705	0.679644	0	0.419549	0.475288	0.52159
0.599475	0	0	0.464513	0.673124	0.857542	0	0	1.04287	0.613903	0.502238	0	0	0	0.54825	0.904116	0.441288	0.361281	0.610903	0.481298	1.24045	0	0.772318	0.942354	0	0	0.843456	0	0	0.773297	0	0	0.445002	0.372463	0.798147	0	0	0.588041	1.20622	1.06117	0.207916	0.723724	1.00533	0.638405	0.562569	0.959105	0	0.83749	0.933779	0.232319
0.362485	0	0	0.17401	0.406075	0.389618	0	0	0.614835	0.336621	0.267545	0	0	0	0.293546	0.183748	0.335491	0.331868	0.604859	0.100663	0.895023	0	0.437447	0.46444	0	0	0.677101	0	0	0.803681	0	0	0.308831	0.654925	0.566525	0	0	0.169317	0.477776	0.695969	0.228289	0.316887	0.683263	0.492322	0.831281	0.605729	0	0.470278	0.402526	0.242896
0.512327	0	0	0.231722	0.294455	0.518055	0	0	0.685747	0.419961	0.0970484	0	0	0	0.586637	0.407084	0.574777	0.616124	0.642596	0.162899	0.766765	0	0.480569	0.573912	0	0	0.807134	0	0	1.08643	0	0	0.338829	0.931304	0.748325	0	0	0.282512	0.244209	0.753635	0.25338	0.244306	0.36543	0.769859	0.418365	0.856326	0	0.445911	0.4755	0.514597
0.785783	0	0	0.75355	0.983723	0.754571	0	0	1.11766	0.76527	0	0	0	0	1.37389	0.971421	0.573435	1.26512	1.08812	1.17843	1.03594	0	0.865869	1.16082	0	0	1.22234	0	0	1.94252	0	0	0.349986	2.41173	1.64546	0	0	0.177092	0.485255	1.29007	0.332701	1.0099	1.18138	1.00066	0.779908	0.862861	0	1.28073	1.37465	0.539615
0.431965	0	0	1.11432	1.15958	0.669781	0	0	1.32302	2.23281	0.662888	0	0	0	0.62598	1.8161	1.3239	0.851746	0.728084	1.424	1.50688	0	0.667474	1.22514	0	0	1.77782	0	0	1.08904	0	0	1.43874	0.757026	1.36678	0	0	2.16977	1.36112	1.95869	0.559399	1.10861	1.80596	1.50572	1.28228	1.93668	0	0.673335	3.03638	0.670153
0.33622	0	0	0.582795	0.429217	0.312861	0	0	0.857203	0.26152	0.227479	0	0	0	0.857176	0.560841	0.387155	0.890143	0.797236	1.03437	0.207428	0	0.408649	0.0990137	0	0	0.694604	0	0	1.01703	0	0	0.766357	1.42182	0.859665	0	0	0.392253	0.276713	0.570967	0.31713	0.467017	0.48302	1.55438	0.175763	1.03644	0	0.888564	0.609723	0.483176
0.963899	0	0	1.43557	0.674561	1.33068	0	0	0.803147	1.03628	0.812889	0	0	0	1.87473	0.962342	1.07772	1.18219	0.950163	0.387834	0.629401	0	1.50787	0.741477	0	0	1.54342	0	0	1.51209	0	0	0.352475	1.53465	1.49823	0	0	0.65988	1.42296	1.10181	0.604735	1.60934	0.747942	1.50416	0.690264	2.01118	0	1.29213	1.73827	1.31015
0.273429	0	0	0.259535	0.201914	0.29815	0	0	0.422905	0.430513	0.234763	0	0	0	0.725113	0.194972	0.318831	0.523806	0.136769	0.47592	0.623012	0	0.476689	0.414636	0	0	0.434712	0	0	0.345373	0	0	0.326224	0.523012	0.433949	0	0	0.395176	0.568946	0.333227	0.238636	0.171431	0.565243	0.623537	0.576752	0.60726	0	0.420154	0.487086	0.259885
0.788349	0	0	0.558185	0.894567	0.474195	0	0	0.907258	1.37595	0.338598	0	0	0	1.81057	0.981363	1.03337	0.577936	0.383274	0.753865	0.903881	0	0.436582	0.967601	0	0	0.862584	0	0	0.575866	0	0	1.04546	1.15075	0.561526	0	0	1.64537	0.753721	1.36882	0.230653	1.06528	0.999622	1.40987	0.804078	1.47127	0	0.263662	0.999349	0.268213
0.754387	0	0	0.770242	0.670792	0.580261	0	0	1.3517	1.29162	0.286786	0	0	0	0.864486	1.27075	1.21992	0.550958	1.41473	1.08184	0.656207	0	0.243482	0.754579	0	0	0.659017	0	0	1.18428	0	0	1.49363	1.05794	0.580553	0	0	2.2916	0.671418	1.73095	0.638295	0.54027	1.75888	1.50178	0.833262	1.31387	0	1.26533	2.58504	0.586019
0.980363	0	0	0.969038	0.646181	0.795474	0	0	2.69902	1.22637	0.460084	0	0	0	0.979998	2.93208	1.13969	0.912548	1.90614	0.0924505	1.4055	0	0.477771	0.752051	0	0	1.36079	0	0	0.952884	0	0	1.50732	1.36719	2.21857	0	0	1.89318	1.40162	3.80819	0.473668	1.25189	0.490108	0.350187	0.838847	2.65246	0	1.56106	2.66244	0.578564
0.944538	0	0	0.664783	0.64445	0.537938	0	0	1.7338	1.0684	0.295935	0	0	0	0.780836	2.56225	0.792884	0.411488	1.37551	0.810819	0.880013	0	0.526654	0.739138	0	0	0.993742	0	0	1.34717	0	0	0.898355	1.03553	1.01762	0	0	2.05901	0.846411	2.88733	0.518232	1.12934	0.948556	0.944226	0.887699	2.16834	0	0.985515	1.97074	0.280409
0.67971	0	0	0.64022	0.502574	0.348559	0	0	1.60798	0.816196	0.255362	0	0	0	0.855864	1.57215	1.31649	0.605215	0.744207	0	0.993002	0	0.290897	0.73334	0	0	0.721573	0	0	0.543231	0	0	0.812077	0.982997	1.17854	0	0	1.92639	0.954354	2.63394	0.349883	1.21482	1.06072	0.63264	0.630989	1.97804	0	0.756374	1.62008	0.219453
0.977587	0	0	0.472334	1.11368	0.878638	0	0	1.58639	0.281591	0.405969	0	0	0	1.32299	0.74942	1.13333	0.141153	0.731198	1.27421	0.981964	0	0.794818	0.918659	0	0	1.44898	0	0	0.680179	0	0	1.20833	0.978891	0.919812	0	0	1.19241	0.958683	1.02495	0.546429	0.62504	1.018	2.35161	0.405094	1.535	0	0.790685	1.52378	0.61476
0.445776	0	0	0.525159	0.338515	0.164193	0	0	0.612583	0.791658	0.225692	0	0	0	0.637376	0.138543	0.580281	0.369932	0.981183	1.01482	0.531909	0	0.378027	0.340429	0	0	0.582424	0	0	0.476709	0	0	0.812579	0.683125	0.978145	0	0	0.92453	0.381159	0.635492	0.147437	0.481865	0.72474	1.38358	0.514981	1.05263	0	0.636793	1.2105	0.451821
0.15622	0	0	0.235024	0.394162	0.545658	0	0	0.392191	0.465139	0.0289251	0	0	0	0.314863	0.46428	0.249009	0.281039	0.421382	0.839306	0.482194	0	0.619105	0.499441	0	0	0.339581	0	0	0.61627	0	0	0.353446	0.651107	0.586572	0	0	0.547294	0.465134	0.50344	0.340502	0.24947	0.589467	0.76134	0.715943	0.570228	0	0.38619	0.782649	0.264149
0.274116	0	0	0.381949	0.661238	0.283418	0	0	1.20175	0.651649	0	0	0	0	0.731234	0.988777	0.353713	0.859051	1.05084	1.57692	0.414851	0	0.813516	0.383198	0	0	0.711007	0	0	0.956219	0	0	0.687742	1.70988	1.10465	0	0	0.72164	0.483282	1.23325	0	0.477668	0.975893	1.26181	0.321299	1.51454	0	1.17227	1.12476	0.253542
0.849936	0	0	0.5206	0.854246	0.780374	0	0	0.391925	0.738938	0.112127	0	0	0	1.64144	1.29132	0.818261	0.287746	1.40764	2.3083	0.75124	0	0.858064	0.699174	0	0	0.994481	0	0	1.87862	0	0	1.57909	1.02085	0.362675	0	0	0.968314	0.832067	0.955181	0.136354	0.414462	0.845735	1.81215	0.297412	1.62791	0	1.46669	1.08012	0.57817
0.378967	0	0	0.489008	0.610999	0.280017	0	0	1.00443	0.843075	0.172272	0	0	0	0.870506	0.845066	0.619138	0.288024	0.892257	0.398895	0.438685	0	0.378839	0.605789	0	0	0.654437	0	0	0.654635	0	0	0.654498	0.952242	0.627845	0	0	1.16903	0.637409	1.32796	0.200581	0.562035	0.754761	1.1798	0.564115	1.18605	0	0.867274	0.883061	0.10066
0.481748	0	0	0.45887	0.251876	0.361133	0	0	0.493931	0.43867	0.184673	0	0	0	0.410161	0.871862	0.300788	0.550286	0.455044	0.490132	0.606311	0	0.340084	0.411177	0	0	0.557928	0	0	0.561101	0	0	0.396813	0.501287	0.698019	0	0	0.482061	0.90721	0.770923	0.403623	0.481215	0.622461	0.505752	0.304417	0.684765	0	0.447797	0.548328	0.465779
0.845519	0	0	0.828346	1.23941	0.914482	0	0	1.53787	1.29784	0.578253	0	0	0	1.33411	2.21301	0.812063	0.520899	1.30354	0.915297	1.19738	0	1.21271	1.11832	0	0	1.04288	0	0	2.00927	0	0	1.40225	1.76746	1.6062	0	0	0.996737	1.73847	1.94721	0.771414	1.56278	1.75244	2.3715	1.77253	1.72804	0	1.81851	2.84275	0.998043
0.832535	0	0	0.204449	0.579072	0.162555	0	0	0.813961	0.720275	0.118775	0	0	0	1.12615	0.637638	0.390339	0.272615	0.764771	1.55227	0.354794	0	0.67684	0.567474	0	0	0.878417	0	0	0.836969	0	0	1.65018	1.00614	0.646984	0	0	1.331	0.523318	0.909693	0.198198	0.580636	0.97607	1.29797	0.313194	1.64715	0	1.03445	0.690786	0.518273
0.854866	0	0	0.372593	0.721541	0.0897622	0	0	1.32215	0.689752	0.293657	0	0	0	0.630555	0.959183	0.733955	0.312356	0.932107	0.140519	0.478423	0	0.614766	0.695988	0	0	0.32355	0	0	0.736613	0	0	0.623352	1.12948	0.50252	0	0	1.5061	0.721809	1.62809	0.240628	0.987543	1.12009	1.10719	0.701551	1.65605	0	0.727741	1.26899	0.171482
1.02599	0	0	0.984854	0.44267	0.50454	0	0	1.79011	1.88222	0.232189	0	0	0	1.72182	1.21929	1.33629	0.652192	1.02986	0.34177	0.863455	0	0.320971	0.844678	0	0	0.793074	0	0	0.555987	0	0	1.13883	1.22446	0.705907	0	0	2.57901	0.931378	2.62836	0.46874	1.03022	1.58229	1.22134	0.708539	2.34253	0	1.16078	1.55112	0.180894
1.33234	0	0	0.825075	0.582956	0.7314	0	0	1.81761	1.84428	0	0	0	0	1.32265	1.64614	0.712456	0.245748	1.80895	1.20138	0.818179	0	1.1064	0.982695	0	0	0.661473	0	0	1.03089	0	0	2.00543	1.34986	1.31361	0	0	1.85443	1.05748	2.72008	0.505755	0.660812	0.899513	1.59834	0.988969	2.35054	0	1.47516	1.86182	0.42491
0.485981	0	0	0.295033	0.565789	0.419879	0	0	1.01507	1.44742	0.18463	0	0	0	0.569105	0.897906	0.192811	0.782682	0.804791	1.05098	0.448795	0	0.59128	0.599676	0	0	0.756898	0	0	0.503234	0	0	1.22177	1.01727	0.955113	0	0	0.963802	0.861694	1.24801	0.1694	0.957754	1.37218	1.0116	1.1314	1.79441	0	0.942266	1.74391	0.323936
0.748327	0	0	0.390299	0.631439	0.311067	0	0	0.669426	0.39416	0.248386	0	0	0	1.08803	0.637164	0.596737	0.401384	0.515324	1.14485	0.477027	0	0.658807	0.684468	0	0	0.673209	0	0	0.758219	0	0	1.01345	0.991746	0.745521	0	0	1.21904	0.48981	0.67565	0	0.442319	1.01332	1.5823	0.624482	1.4878	0	0.700031	1.04303	0.34617
0.820379	0	0	0.380653	0.787082	0.664486	0	0	0.849648	1.29879	0.213788	0	0	0	0.688944	1.98509	0.600449	0.34066	1.72973	2.79631	0.419004	0	1.15907	0.920021	0	0	0.763528	0	0	2.01132	0	0	1.62481	1.63526	0.733463	0	0	1.7629	0.351198	1.85533	0.0793932	0.33056	1.13529	2.01249	1.19762	2.12996	0	1.67764	2.43458	0.535199
0.471201	0	0	0.915138	0.48395	0.429677	0	0	0.764623	0.914449	0.808683	0	0	0	1.11091	0.838161	0.733528	0.536791	0.581572	0.242962	1.25753	0	0.963824	1.09318	0	0	1.09469	0	0	0.736954	0	0	0.617895	0.795216	0.66924	0	0	0.60825	0.916828	0.806621	0.403352	0.918959	0.861449	0.828184	0.6765	0.848316	0	0.639901	0.981897	0.40064
1.17958	0	0	0.587761	0.682325	0.552394	0	0	0.836602	1.77679	0.212582	0	0	0	1.32514	1.70139	0.607886	0.563272	1.30324	0.265263	0.383059	0	0.952969	1.09376	0	0	0.444129	0	0	0.936875	0	0	1.52667	1.27918	0.962604	0	0	1.17397	0.564216	1.91409	0.279691	0.344662	1.29748	1.79626	0.927972	0.918123	0	0.813457	1.96306	0.143419
0.952945	0	0	0.84614	0.66229	0.802418	0	0	2.19498	0.739122	0.504884	0	0	0	0.901594	3.29928	0.738928	0.673469	1.75342	0.999954	1.09152	0	1.01184	1.08916	0	0	1.39281	0	0	2.07392	0	0	0.749777	1.42077	1.12679	0	0	1.41042	1.04564	3.08334	0.576458	0.758874	0.522434	1.26155	0.577765	1.77242	0	1.28215	2.98201	0.603897
0.415649	0	0	0.816433	0.511475	0.429905	0	0	2.05344	0.84564	0.3629	0	0	0	1.58006	1.97795	1.15642	0.558714	0.883607	0	1.18336	0	0.308709	1.05301	0	0	0.526353	0	0	1.05543	0	0	0.672546	1.53787	0.940723	0	0.344086	2.03411	1.07402	3.07619	0.264106	1.54633	0.742837	0.760535	0.314105	2.13214	0	1.10007	0.780581	0.508996
0.603877	0	0	0.489545	0.66445	0.336467	0	0	0.595678	1.41948	0.212938	0	0	0	0.603668	0.908481	0.626654	0.393082	0.850612	1.78958	0.57746	0	0.606796	0.422213	0	0	0.559385	0	0	0.751652	0	0	1.06205	0.76481	0.713888	0	0	1.73813	0.4566	1.43774	0.171036	0.499553	0.974991	1.09096	0.784132	1.80259	0	0.958656	1.85706	0.325876
0.9227	0	0	0.666281	0.89352	0.335914	0	0	1.95045	1.62542	0.336349	0	0	0	1.22183	1.61176	1.16219	0.52959	1.42268	1.29242	0.751489	0	0.839905	1.03919	0	0	0.820644	0	0	0.891757	0	0	1.63883	1.46936	1.1731	0	0	2.66274	0.919585	2.31305	0.188583	0.879166	1.60168	1.67426	0.753004	2.73746	0	1.42611	1.63983	0.640245
1.25874	0	0	0.757382	0.837309	0.35233	0	0	1.45263	1.70819	0.190845	0	0	0	0.365725	1.27239	1.00969	0.517242	1.25698	0.666724	0.788086	0	0.726882	0.843913	0	0	0.500672	0	0	0.960944	0	0	1.11252	0.712873	0.628766	0	0	1.95411	0.936918	1.85192	0.452982	0.815664	1.83162	1.70976	0.841042	1.60987	0	0.870477	2.30436	0.348765
1.15075	0	0	0.551818	0.910216	0.861759	0	0	1.00692	0.566607	0.62161	0	0	0	0.864239	0.746518	1.17605	1.2336	0.814454	1.23987	0.61236	0	0.798329	0.711555	0	0	2.01596	0	0	0.675853	0	0	1.21555	1.20158	1.6873	0	0	1.78819	1.07596	0.911071	0.360921	1.63209	1.52143	1.75781	1.29904	2.41044	0	0.743594	1.82764	0.870639
0.606879	0	0	0.491778	0.545941	0.52886	0	0	0.82578	0.996337	0.310079	0	0	0	1.02501	0.393348	0.533351	0.439873	0.697098	0.283327	0.515601	0	0.70547	0.523131	0	0	0.722232	0	0	0.433903	0	0	0.552611	0.485788	0.474541	0	0	0.712137	1.01575	0.869085	0.0523979	0.417843	0.672543	1.02642	0.988516	1.02464	0	0.913147	1.01194	0.34702
0.337076	0	0	0.195196	0.205264	0.129116	0	0	0.262772	0.166497	0.247692	0	0	0	0.670029	0.997751	0.135968	0.374375	0.0937179	0.0772164	0.226535	0	0.348608	0.200054	0	0	0.358557	0	0	1.02349	0	0	0.263986	0.413006	0.155663	0	0	0.103873	0.0971601	0.53304	0.186893	0.399449	0.243932	0.0680534	0.369733	0.228631	0	0.119003	0.378173	0.231471
0.122564	0	0	0.154544	0.181818	0	0	0.0780965	0.168725	0.216333	0.103431	0	0	0	0.327433	0	0.126763	0.170789	0.1148	0.0812929	0.112233	0	0.186734	0.134016	0	0	0.149852	0	0	0.369118	0	0	0.184407	0.22259	0.187472	0	0	0.131067	0.180802	0.16331	0.171968	0.181477	0.248579	0.170372	0.15517	0.129083	0	0.167575	0.208237	0.161204
0.125886	0	0	0.126372	0.0939401	0.0975261	0	0	0.230554	0.128304	0.0398737	0	0	0	0.277941	0.1331	0.0753338	0.26346	0.158592	0.150673	0.155235	0	0.133042	0.134865	0	0	0.240895	0	0	0.41588	0	0	0.142201	0.271018	0.286218	0	0	0.193122	0.169509	0.275355	0.119613	0.3061	0.177053	0.12358	0.1647	0.175417	0	0.144213	0.257678	0.133801
0.265824	0	0	0	0.0441807	0.127658	0	0.361352	0.221099	0.0998524	0.183139	0	0	0	0.292545	0	0.0940722	0.252387	0.138046	0.132093	0.156761	0	0.152871	0.183208	0	0	0.374939	0	0	0.243178	0	0	0.293407	0.108609	0.234607	0	0	0.227069	0.238666	0.205707	0.0740635	0.218073	0.0754733	0.196168	0.22459	0.161103	0	0.343587	0.164438	0.132698
0.195253	0	0	0.237653	0.208462	0.223912	0	0	0.162926	0.223688	0.263711	0	0	0	0.251579	0.100964	0.127676	0.264266	0.158494	0.100012	0.144955	0	0.243279	0.0584653	0	0	0.310676	0	0	0.349788	0	0	0.202003	0.328097	0.153989	0	0	0.0908823	0.169514	0.179187	0.267082	0.296756	0.314646	0.250709	0.414884	0.202496	0	0.259615	0.272509	0.256293
0.230681	0	0	0.161658	0.0935532	0.201054	0	0	0.0833565	0.168744	0.245363	0	0	0	0.29942	0.12741	0.097177	0.154184	0.249953	0.253554	0.190488	0	0.278144	0.270031	0	0	0.255191	0	0	0.464688	0	0	0.191721	0.250367	0.167828	0	0	0.210361	0.204143	0.193688	0.17598	0.0835177	0.273821	0.430426	0.313654	0.245613	0	0.273289	0.303441	0.168424
0.241464	0	0	0.310366	0.344718	0.305649	0	0	0.261993	0.450829	0.233295	0	0	0	0.524454	0.38523	0.208321	0.415958	0.427294	0.134479	0.468158	0	0.410313	0.312916	0	0	0.552103	0	0	0.514231	0	0	0.461457	0.237616	0.411998	0	0	0.405835	0.534162	0.406325	0.185625	0.371653	0.378416	0.447396	0.426735	0.387286	0	0.459483	0.517862	0.259985
0.361917	0	0	0.242185	0.130966	0.470825	0	0	0.525793	0.418914	0.193537	0	0	0	0.554812	0.405765	0.368283	0.248047	0.409196	0.409523	0.557317	0	0.333121	0.49193	0	0	0.429935	0	0	0.43712	0	0	0.511088	0.223224	0.305208	0	0	0.644349	0.610713	0.310168	0.288752	0.391979	0.429052	0.381114	0.350381	0.388255	0	0.365709	0.580809	0.323135
0.256467	0	0	0.186042	0.158906	0.380461	0	0.175431	0.35862	0.355917	0.248997	0	0	0	0.7099	0	0.209684	0.435681	0.399055	0.358704	0.296397	0	0.421043	0.283688	0	0	0.167131	0	0	0.258251	0	0	0.385804	0.770043	0.333932	0	0	0.242257	0.356713	0.103711	0.126781	0.43531	0.343308	0.565171	0.584013	0.401531	0	0.565985	0.301251	0.37775
0.177995	0	0	0.540898	0.251766	0.56395	0	0	0.484561	0.6557	0.385551	0	0	0	0.452946	0.425741	0.301926	0.271196	0.406079	0.374261	0.547477	0	0.787361	0.577864	0	0	0.528741	0	0	0.44592	0	0	0.319884	0.373538	0.308722	0	0	0.535695	0.410105	0.44183	0.274346	0.106313	0.549417	0.580757	0.69011	0.530833	0	0.509954	0.457019	0.286732
0.159652	0	0	0.408021	0.283696	0.284301	0	0	0.47862	0.619244	0.320999	0	0	0	0.595745	0.107793	0.359668	0.256703	0.499213	0.685028	0.881111	0	0.65796	0.430574	0	0	0.338137	0	0	0.448201	0	0	0.53384	0.708167	0.703596	0	0	0.147555	0.431879	0.471124	0.426854	0.285749	0.29182	0.914022	0.430774	0.565899	0	0.825397	0.369466	0.173501
0.455124	0	0	0.481511	0.361271	0.259006	0	0	0.745316	0.472547	0.254572	0	0	0	0.705884	0.0409005	0.558444	0.362985	0.332149	0.677404	0.418896	0	0.489027	0.258425	0	0	0.616137	0	0	0.234397	0	0	0.673169	0.342689	0.5829	0	0	0.30558	0.60782	0.462957	0.348342	0.533805	0.647898	1.06991	0.484413	0.768904	0	0.854283	0.500057	0.294741
0.487697	0	0	0.42085	0.345428	0.431687	0	0	0.101223	0.4902	0.0673954	0	0	0	0.425022	0.321349	0.530935	0.581782	0.58199	0.875035	0.742681	0	0.467225	0.162488	0	0	0.403022	0	0	0.785758	0	0	0.382214	0.747931	0.680796	0	0	0.459589	0.502488	0.506206	0.292291	0.377321	0.731278	0.75737	0.674488	0.786522	0	0.65032	0.288779	0.62639
0.372639	0	0	0.0723739	0.523333	0.560433	0	0	0.941504	0.527488	0.268582	0	0	0	0.403492	0.384261	0.545752	0.416002	0.563016	0	0.59615	0	0.860269	0.515729	0	0	0.627649	0	0	0.32249	0	0	0.267159	0.520516	0.974328	0	0.112208	0.289864	0.667817	0.982797	0.294164	0.497928	0.81815	0.492455	0.534265	0.934274	0	0.53325	0.663136	0.298119
0.449175	0	0	0.520614	0.576359	0.514721	0	0	0.639781	0.500492	0.274402	0	0	0	0.481379	0.679435	0.683225	0.47202	0.672367	0.408468	1.00677	0	0.90338	0.765937	0	0	0.738075	0	0	1.11101	0	0	0.348302	0.792019	0.645583	0	0	0.365797	0.621552	0.992366	0.380679	0.42433	0.641199	0.781246	0.644563	0.988015	0	0.579988	0.29893	0.486683
0.974679	0	0	0.611334	1.12483	0.613715	0	0	1.56471	0.753496	0.382837	0	0	0	0.997109	1.33804	0.9858	1.2066	1.01467	0.285478	1.14855	0	0.831557	0.855494	0	0	1.53458	0	0	1.97421	0	0	0.543712	1.154	1.64091	0	0	0.700419	1.00112	1.65883	0.507223	1.09111	0.864585	1.05543	0.871609	1.44786	0	0.70604	1.21864	0.815125
0.698538	0	0	0.528287	1.08431	0.544209	0	0	1.15274	0.372536	0.154631	0	0	0	1.01668	0.450362	0.912261	0.513811	0.738059	0.0386879	0.194987	0	0.59519	0.530004	0	0	0.8393	0	0	0.610126	0	0	0.275309	1.51606	0.902856	0	0	0.534829	0.620958	0.752036	0.140133	0.953094	0.853266	1.15155	0.327312	1.22251	0	0.628174	0.608884	0.643838
0.457564	0	0	1.03789	1.1019	0.398481	0	0	1.06115	2.65825	0.347816	0	0	0	0.916496	1.74898	1.28896	0.764052	0.545371	0.587694	1.17455	0	0.759183	1.17471	0	0	0.682042	0	0	0.810927	0	0	0.959883	1.15298	1.12431	0	0	2.0412	0.91059	2.53182	0.73338	0.926845	1.45531	1.67988	1.41582	1.63244	0	0.805915	2.37663	0.431781
0.427955	0	0	0.653194	0.813872	0.530539	0	0	1.30204	1.02697	0.374578	0	0	0	0.732663	0.981167	0.460558	0.56967	0.654719	0.524679	0.339903	0	0.478335	0.528163	0	0	1.07912	0	0	0.743831	0	0	1.11973	0.918011	1.29101	0	0	0.64759	0.843472	0.874941	0.327777	0.671048	0.773382	1.5132	0.465147	1.30798	0	0.691928	1.00869	0.536558
0.825491	0	0	0.828963	0.488603	0.990631	0	0	0.769093	0.739457	0.557207	0	0	0	1.21992	0.807734	0.810981	0.8044	0.617984	0.609445	0.271712	0	0.975195	0.358691	0	0	1.03542	0	0	0.926245	0	0	0.233567	1.05878	1.05055	0	0	0.588279	0.91594	0.876787	0.364172	0.945461	0.532109	1.21497	0.699961	1.63622	0	0.795073	1.52473	0.589567
0.281602	0	0	0.675356	0.235418	0.426376	0	0	0.875803	1.3192	0.44344	0	0	0	0.983392	0.525798	0.833519	0.397917	0.812598	0	0.725319	0	0.176425	0.75057	0	0	0.72745	0	0	0.280908	0	0	0.647972	0.493869	0.940414	0	0.163949	0.618473	0.73417	1.02585	0.23575	0.482314	0.885958	0.926265	0.168836	0.947174	0	0.969274	1.08053	0.527558
1.09404	0	0	0.863254	0.90971	0.660453	0	0	1.099	2.6874	0.435504	0	0	0	2.51958	1.35972	1.72443	1.20179	1.17915	1.42433	1.21795	0	0.500852	1.00362	0	0	1.10935	0	0	0.575779	0	0	1.47117	1.41613	1.02118	0	0	3.09745	1.02492	2.54221	0.446378	0.990838	1.17456	1.64144	1.04913	2.22986	0	1.14744	1.78725	0.343733
0.9576	0	0	1.10877	1.00645	0.637093	0	0	1.75648	1.71001	0.305665	0	0	0	0.511801	2.20405	1.02498	0.641029	2.1823	2.13665	0.737012	0	0.55231	0.901149	0	0	0.59354	0	0	2.14933	0	0	1.73508	1.58178	0.630781	0	0	2.55701	0.798793	2.26382	0.77509	0.824285	2.29782	1.83999	0.853529	1.70696	0	2.08624	3.48805	0.696485
1.03089	0	0	0.987132	0.672634	0.606007	0	0	2.02502	1.23511	0.260695	0	0	0	1.48345	1.84579	1.16784	0.512351	1.61401	0.724732	1.11971	0	0.435061	0.774464	0	0	0.667817	0	0	0.785574	0	0	1.54996	1.46021	1.23613	0	0	2.43992	0.918939	3.15487	0.226796	0.927592	1.01594	1.21931	0.675775	2.58099	0	1.42961	1.94237	0.360978
1.3189	0	0	0.990884	0.925545	0.444072	0	0	1.85778	1.40512	0.291552	0	0	0	1.29902	2.55254	1.0322	0.322918	1.83436	1.84801	0.748494	0	0.959205	1.04735	0	0	0.714267	0	0	2.0664	0	0	0.84361	1.53079	0.418863	0	0	3.08102	0.668042	3.1313	0.44034	1.16129	1.23021	1.82573	0.858561	3.09496	0	1.66967	2.04649	0.461138
1.28081	0	0	0.965101	0.989706	0.803455	0	0	2.11091	1.29884	0.565127	0	0	0	1.02773	3.73702	1.42273	0.611082	1.88244	0.73795	1.23128	0	0.876553	0.97588	0	0	0.952923	0	0	2.09915	0	0	0.984921	1.70328	1.56156	0	0	2.37239	0.909112	4.09488	0.51872	1.0969	1.1398	1.28066	1.22736	2.56798	0	1.81472	3.4818	0.627164
0.625368	0	0	0.6814	1.01088	0.953055	0	0	1.6076	0.942602	0.262758	0	0	0	1.55517	1.39152	1.41126	0.482648	1.38877	1.73829	1.13767	0	0.868207	1.04738	0	0	1.40431	0	0	0.662211	0	0	1.34752	1.5416	1.33891	0	0	2.16856	0.997044	1.90677	0.499826	0.831034	1.39143	2.40315	0.70979	2.60509	0	0.978401	1.84524	1.0336
0.464388	0	0	0.32094	0.598359	0.463371	0	0	0.648765	0.904374	0.211292	0	0	0	0.988955	0.411161	0.454094	0.756726	0.604702	1.48492	0.359457	0	0.726802	0.625028	0	0	0.709035	0	0	0.647474	0	0	1.07041	1.46282	0.980025	0	0	0.844276	0.547445	0.572193	0.241994	0.757379	0.97413	1.85652	0.954034	1.22243	0	0.963772	0.888082	0.309683
0.535333	0	0	0.493405	0.479355	0.49244	0	0	0.535109	0.370133	0.272141	0	0	0	0.360668	0.310578	0.232767	0.519293	0.51463	0.590522	0.418084	0	0.656601	0.389883	0	0	0.263835	0	0	0.430768	0	0	0.236492	0.684453	0.558324	0	0	0.655092	0.466934	0.601527	0.0320598	0.468641	0.604616	0.779247	0.720018	0.925991	0	0.478041	0.63582	0.70248
0.529221	0	0	0.308743	0.333661	0.342936	0	0	1.15827	0.818958	0.191296	0	0	0	0.7642	0.83187	0.745244	0.667887	1.04045	0.496468	0.49505	0	0.243268	0.495153	0	0	0.956443	0	0	0.414983	0	0	0.955943	1.00416	1.04833	0	0	0.971468	0.863617	1.30244	0	0.645264	0.783312	0.980959	0.47243	1.59135	0	0.832276	1.07374	0.36702
0.646436	0	0	0.363522	0.713651	0.454427	0	0	1.12942	0.931855	0.279715	0	0	0	1.06551	0.428246	0.738063	0.556984	0.745707	0.0675805	0.360833	0	0.552162	0.477201	0	0	0.837472	0	0	0.409099	0	0	0.664457	0.625771	0.314668	0	0	0.779419	0.689783	0.898106	0.225073	0.982039	0.835092	0.842387	0.319443	1.29288	0	0.634234	0.723902	0.117682
0.765713	0	0	0.31895	0.765216	0.472089	0	0	0.942849	0.762475	0.0643161	0	0	0	0.660008	1.81179	0.594209	0.0800489	1.52871	2.18453	0.283108	0	0.876969	0.663187	0	0	0.573501	0	0	1.92517	0	0	1.13344	1.34359	0.653452	0	0	1.31696	0.473091	1.63309	0.270272	0.554674	1.29078	1.8164	0.634865	1.97328	0	1.70938	1.93085	0.430651
0.467421	0	0	0.512902	0.233491	0.640424	0	0	0.499046	0.871858	0.00851427	0	0	0	0.652184	0.972388	0.316555	0.437208	0.573529	0.318246	0.618433	0	0.679106	0.51891	0	0	0.228539	0	0	0.664936	0	0	0.413947	0.72615	0.727155	0	0	0.299858	0.763776	0.871523	0.333922	0.457847	0.764439	0.696804	0.794154	0.865022	0	0.62639	0.677154	0.394702
1.28409	0	0	0.330847	1.24042	0.622996	0	0	1.11295	1.01783	0.234717	0	0	0	1.15744	1.46153	0.988205	0.425048	1.13968	0.671058	0.714016	0	1.20713	0.900605	0	0	0.386315	0	0	1.1142	0	0	1.09401	1.58382	1.19886	0	0	1.41498	0.667326	1.55952	0.301974	1.24518	2.11457	2.11799	1.57444	1.67626	0	1.3302	2.1955	0.74646
1.30283	0	0	0.259888	0.967762	0.274237	0	0	1.84469	1.12407	0.105558	0	0	0	1.86871	0.898263	0.746679	0.147676	1.35002	1.40446	0.687459	0	1.09599	1.01542	0	0	0.907586	0	0	0.935453	0	0	2.41642	1.3965	1.00759	0	0	1.9045	1.09512	1.5441	0.0897194	0.83821	1.45796	1.8198	0.564546	2.85178	0	1.48371	0.740902	0.660635
1.02246	0	0	0.345044	0.624041	0.192745	0	0	1.2693	0.68371	0.147394	0	0	0	0.595015	1.16161	0.851244	0.336539	1.33317	1.20475	0.478629	0	0.632206	0.651683	0	0	0.533242	0	0	1.15139	0	0	0.812934	1.14052	0.489692	0	0	1.96144	0.590503	1.6221	0.352562	0.759045	1.24543	1.29806	0.584942	1.84672	0	0.968979	1.30855	0.287861
1.15978	0	0	1.01069	0.599882	0.334935	0	0	1.77372	2.05853	0.381284	0	0	0	1.5296	1.47655	1.77161	0.736053	1.02883	1.70045	1.20025	0	0.327405	1.12009	0	0	1.05171	0	0	0.984357	0	0	1.59381	1.42545	0.742282	0	0	3.06905	1.16845	2.73149	0.586844	1.02468	1.95765	1.49706	0.822418	2.7057	0	1.53237	2.50534	0.350468
1.57698	0	0	0.397234	0.585714	0.550324	0	0	1.58756	0.824474	0.0141979	0	0	0	1.4492	1.48467	0.65895	0.182576	1.52929	1.82499	0.708126	0	1.00951	0.892622	0	0	0.611358	0	0	1.44668	0	0	2.10686	1.26398	0.592703	0	0	1.95549	0.762609	2.02374	0.192005	0.559566	0.973465	1.6142	0.46205	2.35287	0	1.58721	0.766776	0.477027
1.06376	0	0	1.08183	1.19844	0.867937	0	0	1.6048	2.21686	0.651719	0	0	0	0.898553	2.46022	1.26113	0.889962	1.41696	0.964779	1.25369	0	0.657104	1.26491	0	0	1.65803	0	0	1.00306	0	0	1.91374	1.17509	1.61387	0	0	2.09365	1.12863	2.76287	0.463132	0.891569	1.75169	1.77327	1.0056	2.46833	0	1.10663	3.3561	0.459496
0.233426	0	0	0.445424	0.661335	0.498503	0	0	0.118274	0.899446	0.304588	0	0	0	0.779759	0.545994	0.168044	0.461111	0.797466	1.35985	0.363841	0	0.52373	0.271788	0	0	0.572004	0	0	0.619655	0	0	1.07314	1.1204	1.12645	0	0	0.992319	0.673224	0.863601	0.277144	0.74337	1.17014	1.1582	1.53416	1.68719	0	0.737659	1.78785	0.800944
0.83047	0	0	0.472505	0.778598	0.490677	0	0	1.12405	1.5603	0.174791	0	0	0	0.518224	0.698569	0.813308	0.329508	1.27479	0.0992862	0.486331	0	0.678269	0.923143	0	0	0.299027	0	0	0.375533	0	0	1.21314	0.84411	1.00737	0	0	1.6222	0.726684	1.72781	0.2293	0.548368	1.1588	1.54135	1.16956	1.28468	0	0.890869	1.70799	0.486301
0.217257	0	0	0.478149	0.264867	0.355118	0	0	0.590417	1.57779	0.138163	0	0	0	0.835129	0.246171	0.813658	0.493825	1.2357	0.283632	0.958046	0	0.677639	0.85862	0	0	0.351454	0	0	0.440094	0	0	0.640673	1.28094	1.19493	0	0	0.664736	0.358604	1.06836	0.179125	0.368302	0.82951	1.49483	0.443433	0.894674	0	0.779683	1.18191	0.319197
1.16777	0	0	0.549856	0.517397	0.624201	0	0	1.3195	1.56297	0.351857	0	0	0	0.650921	1.58025	1.11788	0.433925	1.65012	1.45837	0.850605	0	0.833468	0.726485	0	0	1.21547	0	0	0.973205	0	0	1.74559	1.11172	1.0206	0	0	1.89884	0.610451	1.9981	0.496587	0.563191	1.40148	1.45173	0.831804	1.46738	0	1.10971	2.75127	0.279251
0.94172	0	0	0.954348	0.651705	0.778658	0	0	2.37299	0.882547	0.536347	0	0	0	0.776313	3.50279	0.814758	0.573867	1.79818	1.58265	1.19274	0	0.996597	1.03713	0	0	1.63612	0	0	2.27095	0	0	0.978463	1.18781	1.14884	0	0	1.5796	1.02536	3.08031	0.595379	0.844336	0.51219	1.26889	0.436035	1.98835	0	1.56359	3.03847	0.635847
0.726074	0	0	0.688189	0.697727	0.345092	0	0	1.59807	0.680457	0.12034	0	0	0	0.651024	1.85905	0.881912	0.346954	1.0271	0.513404	0.897711	0	0.716815	0.707375	0	0	0.401154	0	0	1.39538	0	0	0.513422	1.32727	0.658305	0	0	1.95642	0.849328	2.43074	0.38393	1.11692	1.17288	1.13527	0.411558	1.93937	0	1.07742	1.60217	0.536017
1.23741	0	0	0.356778	1.02206	0.613943	0	0	1.32943	1.27517	0.353456	0	0	0	1.77586	1.59216	0.812959	0.352435	1.33523	1.06652	0.753999	0	0.75478	0.988847	0	0	1.00318	0	0	0.992921	0	0	1.88518	1.19845	0.981205	0	0	2.33372	0.930472	2.0168	0.161232	0.702418	1.64024	1.89642	1.12576	2.22907	0	0.981341	1.49575	0.4513
0.677498	0	0	0.569594	0.825445	0.46663	0	0	1.39207	1.03287	0.240332	0	0	0	1.07765	1.3447	0.818927	0.697137	0.585984	1.42532	0.492834	0	0.828183	0.76603	0	0	1.12792	0	0	0.734007	0	0	0.893973	0.868057	1.07665	0	0	1.43579	1.05438	1.25427	0.312436	0.911382	1.22787	1.55018	0.93904	2.28614	0	0.764465	1.7918	0.627072
2.20725	0	0	1.69867	1.39952	1.20629	0	0	2.31856	0.247851	0.41865	0	0	0	1.48409	5.18672	1.09926	0.344719	2.26451	0.574849	1.20011	0	2.59953	2.14381	0	0	0.311556	0	0	4.26686	0	0	0	2.60475	1.24012	0	0	1.45535	0.69083	3.85999	0.711425	1.96284	1.55981	2.71436	1.77791	2.45716	0	2.36807	3.77282	1.24753
1.20108	0	0	0.488851	1.18459	0.622012	0	0	0.714468	1.27362	0.292199	0	0	0	0.766957	0.685358	0.807295	0.799633	0.811238	1.24658	0.687294	0	0.923254	0.81274	0	0	1.49771	0	0	0.486463	0	0	1.25212	0.738248	1.32807	0	0	1.59956	1.13797	0.741218	0	1.31661	1.5927	1.46046	1.47258	2.07764	0	0.461163	1.70143	0.584389
0.448432	0	0	0.546074	0.101683	0.486057	0	0	0.679892	0.590061	0.320431	0	0	0	0.498086	0.399936	0.504047	0.510648	0.435621	0.897927	0.40048	0	0.633184	0.370018	0	0	0.552905	0	0	0.486514	0	0	0.475232	0.632568	0.725872	0	0	0.533624	0.432289	0.720831	0.258572	0.410367	0.621036	0.82438	0.774873	0.96989	0	0.745931	0.621219	0.313254
0.35964	0	0	0.197341	0.221829	0.144263	0	0	0.257042	0.21896	0.25297	0	0	0	0.755181	1.10888	0.130554	0.364234	0.0931987	0.0518463	0.245674	0	0.324861	0.19309	0	0	0.379068	0	0	1.04847	0	0	0.293915	0.394025	0.162955	0	0	0.0747279	0.127623	0.569947	0.182657	0.476555	0.255988	0.0692692	0.388951	0.223592	0	0.174805	0.373875	0.220799
0.213111	0	0	0.194389	0.190755	0.0789632	0	0	0.136675	0.180559	0.202249	0	0	0	0.39392	0.0714968	0.167843	0.178813	0.109108	0.160832	0.205824	0	0.208429	0.239827	0	0	0.19966	0	0	0.492762	0	0	0.183709	0.219555	0.184593	0	0	0.146621	0.131657	0.205616	0.0960596	0.210308	0.265191	0.181646	0.0925552	0.18765	0	0.193213	0.235314	0.243472
0.149258	0	0	0.0835527	0.0855802	0.0988305	0	0.152758	0.136635	0.0560006	0.0844588	0	0	0	0.214009	0	0.0557672	0.171396	0.0739592	0.114425	0.0989327	0	0.0977132	0.114574	0	0	0.189652	0	0	0.288833	0	0	0.128461	0.172454	0.18425	0	0	0.170063	0.123087	0.176011	0.14432	0.180991	0.125188	0.13771	0.162261	0.133102	0	0.109142	0.167694	0.160923
0.183307	0	0	0.0374661	0.0387126	0.161918	0	0.478337	0.142649	0.132657	0.168412	0	0	0	0.240587	0	0.15972	0.231421	0.116714	0.103179	0.164531	0	0.179523	0.151278	0	0	0.286288	0	0	0.183001	0	0	0.224562	0.13203	0.195739	0	0	0.154666	0.16995	0.1784	0.0969796	0.118636	0.0237561	0.221375	0.247699	0.120876	0	0.274384	0.14886	0.141785
0.267143	0	0	0.19469	0.235702	0.182959	0	0.00337868	0.231239	0.182815	0.212266	0	0	0	0.269225	0.00910465	0.16425	0.193298	0.265647	0.226699	0.19984	0	0.302016	0.0831236	0	0	0.199233	0	0	0.453161	0	0	0.22088	0.305745	0.111689	0	0	0.142847	0.147123	0.17145	0.237512	0.280948	0.397344	0.373872	0.348423	0.231867	0	0.289066	0.275468	0.267382
0.307589	0	0	0.152738	0.282377	0.287125	0	0	0.225488	0.395121	0.292561	0	0	0	0.396257	0.0826749	0.164657	0.245451	0.304182	0.282651	0.372853	0	0.38698	0.185774	0	0	0.292168	0	0	0.533462	0	0	0.280459	0.41584	0.187286	0	0	0.206813	0.173393	0.181048	0.0863371	0.41422	0.39096	0.332772	0.460216	0.241514	0	0.288684	0.249704	0.238237
0.38025	0	0	0.261811	0.250013	0.311899	0	0	0.38292	0.331098	0.23131	0	0	0	0.467574	0.18398	0.340349	0.377603	0.279596	0.553011	0.376494	0	0.550243	0.240975	0	0	0.516638	0	0	0.442755	0	0	0.446413	0.493159	0.307724	0	0	0.460029	0.36151	0.303996	0.378743	0.406499	0.27941	0.498809	0.311996	0.479772	0	0.362192	0.472819	0.462115
0.418013	0	0	0.218265	0.16815	0.432865	0	0	0.365498	0.471831	0.351142	0	0	0	0.581068	0.375001	0.202236	0.302745	0.374574	0.417044	0.21192	0	0.632954	0.369599	0	0	0.391808	0	0	0.429905	0	0	0.436374	0.589526	0.247772	0	0	0.591057	0.323045	0.373222	0.24034	0.207529	0.319274	0.479192	0.621535	0.481038	0	0.631759	0.465196	0.333879
0.447811	0	0	0.324816	0.128921	0.303789	0	0	0.228185	0.334927	0.11556	0	0	0	0.599893	0.0659128	0.350963	0.605151	0.394816	0.305066	0.400531	0	0.421918	0.711396	0	0	0.310072	0	0	0.388611	0	0	0.247525	0.456876	0.459552	0	0	0.333107	0.621077	0.15933	0.23335	0.308954	0.400724	0.57355	0.518301	0.334847	0	0.518315	0.473279	0.25378
0.192818	0	0	0.376568	0.258714	0.471201	0	0	0.537502	0.52926	0.301083	0	0	0	0.472408	0.146998	0.245071	0.208677	0.42345	0.256139	0.781516	0	0.436118	0.436178	0	0	0.383184	0	0	0.260506	0	0	0.435301	0.357308	0.397318	0	0	0.439113	0.437325	0.441317	0.166752	0.235054	0.414788	0.526388	0.626818	0.421846	0	0.51205	0.217804	0.324094
0.317841	0	0	0.458174	0.308526	0.61456	0	0	0.371515	0.267465	0.175835	0	0	0	0.549694	0.365894	0.274779	0.419854	0.4562	0.723636	0.908886	0	0.364555	0.375909	0	0	0.594068	0	0	0.573405	0	0	0.55717	0.803452	0.564723	0	0	0.349922	0.590858	0.573163	0.406891	0.481597	0.670094	0.767716	0.456429	0.459673	0	0.337565	0.524914	0.415171
0.289396	0	0	0.384634	0.8648	0.63203	0	0	0.632534	0.480956	0.31983	0	0	0	0.598089	0.102571	0.520002	0.32562	0.351577	0.619107	0.705332	0	0.735593	0.344082	0	0	0.924421	0	0	0.388963	0	0	0.64563	0.709378	1.02039	0	0	0.777645	0.877155	0.871866	0.222324	0.555046	1.03022	1.08018	0.605295	1.0851	0	0.70616	0.685953	0.578366
0.36387	0	0	0.466829	0.634894	0.693265	0	0	0.429124	0.539611	0.220791	0	0	0	0.584914	0.262139	0.266537	0.613531	0.45862	0.893436	0.432999	0	0.631891	0.258111	0	0	0.39459	0	0	0.590339	0	0	0.528996	1.03264	0.592554	0	0	0.280424	0.356928	0.407055	0.0704206	0.496197	0.59378	1.24759	0.702733	0.899991	0	0.892611	0.545415	0.396395
0.42168	0	0	0.335934	0.442923	0.497756	0	0	0.852904	0.537794	0.144205	0	0	0	0.752038	0.416585	0.446007	0.36766	0.750145	0.115166	0.756367	0	0.612638	0.427357	0	0	0.583451	0	0	0.539344	0	0	0.28753	0.578315	0.747904	0	0	0.46388	0.790911	0.834739	0.312614	0.391355	0.572276	0.744531	0.193353	1.07173	0	0.606982	0.649668	0.25027
0.428902	0	0	0.7598	0.523938	0.36508	0	0	0.668086	0.78506	0.169485	0	0	0	0.592187	0.329986	0.554426	0.375613	0.428549	0.584029	0.875988	0	0.358767	0.428569	0	0	0.648579	0	0	0.993456	0	0	0.499384	0.479627	0.606321	0	0	0.182134	0.46437	0.76587	0.236704	0.735723	0.721887	0.817915	0.540818	0.655052	0	0.87436	0.777019	0.283388
0.813422	0	0	0.473077	0.938301	0.273949	0	0	1.40505	1.18749	0.195945	0	0	0	1.8215	0.999633	0.820792	1.03077	0.468461	0	0.70253	0	0.904602	0.922067	0	0	0.656573	0	0	0.957027	0	0	0.551907	1.22759	1.01877	0	0.298014	0.480503	0.473341	1.01096	0.163909	0.893018	0.914361	1.74899	0.723293	1.46854	0	0.693721	1.05462	0.581249
0.558888	0	0	0.459828	1.1036	0.699475	0	0	1.2531	0.759546	0.231616	0	0	0	1.50761	0.644791	0.776169	0.691695	0.78857	0.243642	0.380004	0	1.04753	0.531751	0	0	1.08565	0	0	0.547231	0	0	0.783499	1.08643	0.968948	0	0	0.484807	0.895694	0.687116	0.0866734	0.90444	0.862965	1.36688	0.703724	1.70203	0	0.73988	0.754694	0.730841
0.431109	0	0	0.521688	0.562692	0.196518	0	0	1.10037	1.23748	0.369498	0	0	0	0.629188	1.36042	1.0761	0.27068	0.645371	0.513532	0.904533	0	0.337564	0.764096	0	0	0.622118	0	0	0.631185	0	0	0.822339	0.781352	0.915896	0	0	1.85316	0.788704	2.04856	0.437948	0.971792	1.54708	1.11601	0.902842	1.65725	0	0.538079	2.03182	0.296153
0.77777	0	0	0.721993	0.581078	0.445298	0	0	0.882041	1.05645	0.251201	0	0	0	1.32172	0.500575	0.772131	0.409113	0.709847	0.85702	0.446363	0	0.599563	0.892361	0	0	0.659626	0	0	0.546408	0	0	1.38928	0.987112	0.759828	0	0	0.949513	0.585832	0.902434	0.19333	0.583583	0.683453	1.85227	0.624438	1.26973	0	0.731503	0.750835	0.29602
0.372948	0	0	0.714554	0.847213	0.73237	0	0	1.32882	1.53855	0.428002	0	0	0	1.48401	0.516757	0.660774	0.971024	0.745949	0.172859	0.621541	0	0.925926	0.95376	0	0	1.14534	0	0	0.733867	0	0	0.566468	0.618815	0.952876	0	0	0.345807	1.34687	0.73676	0.245779	0.906919	0.751213	1.53661	0.499052	1.5683	0	0.649747	1.11298	0.730525
0.712653	0	0	0.141323	0.740197	0.321817	0	0	1.26728	0.489011	0.37624	0	0	0	0.783039	0.860185	0.676348	0.93653	0.418557	0.296611	1.04697	0	0.329436	0.546768	0	0	1.17611	0	0	0.458743	0	0	0.533414	0.459887	1.04804	0	0	0.66377	1.4552	0.857836	0.3737	0.843271	0.643702	0.852938	0.615112	1.38837	0	0.196606	0.78407	0.4701
0.973151	0	0	0.780958	0.446172	0.54492	0	0	1.95509	1.6269	0.0731008	0	0	0	1.67087	1.6469	0.895082	0.857387	1.90491	2.37375	0.994031	0	0.48001	0.761627	0	0	1.18434	0	0	1.02341	0	0	1.3484	1.34275	0.671478	0	0	2.84592	0.954464	2.76192	0.401491	0.870927	0.703995	1.34382	0.52878	2.88023	0	1.82534	1.92482	0.501489
0.993179	0	0	0.419132	0.686913	0.471719	0	0	1.37462	1.17032	0.246707	0	0	0	0.94804	1.33052	1.02366	0.756602	1.66577	1.30282	0.650413	0	0.353861	0.622027	0	0	0.574263	0	0	1.14225	0	0	1.42827	1.0995	0.636815	0	0	1.97911	0.543389	1.7188	0.409198	0.657208	1.56373	1.49306	0.664457	1.52201	0	1.35183	1.80909	0.280196
1.06886	0	0	0.946552	0.75583	0.581212	0	0	1.86909	1.1952	0.333318	0	0	0	0.614332	2.2946	0.755273	0.318295	2.0043	1.01071	0.84191	0	0.773362	0.682987	0	0	0.906042	0	0	1.26199	0	0	1.41339	1.26591	1.31485	0	0	2.0653	0.803036	2.93112	0.465522	0.715655	1.10524	1.22244	0.827163	2.13217	0	1.48502	2.69752	0.388182
1.36854	0	0	0.984084	0.719465	0.479593	0	0	1.78236	1.43296	0.161753	0	0	0	1.03696	2.40304	0.604238	0.451693	1.89647	2.04609	0.679623	0	0.903796	0.952485	0	0	0.626219	0	0	2.03799	0	0	1.16061	1.4369	0.480962	0	0	2.64968	0.787651	2.93718	0.300555	0.931199	1.31021	1.569	0.71651	3.0604	0	1.80663	1.76259	0.381774
0.799624	0	0	0.539473	0.750652	0.403054	0	0	1.63812	0.892682	0.171337	0	0	0	1.20567	1.25661	1.04488	0.386695	1.23814	0.846741	0.814562	0	0.501975	0.897362	0	0	0.853524	0	0	0.531464	0	0	1.66959	1.11028	1.12859	0	0	2.06073	1.04629	1.97845	0.137447	0.828818	1.61968	1.66071	0.666718	2.24927	0	0.915325	1.88301	0.607404
0.398672	0	0	0.299572	0.419496	0.429568	0	0	0.629593	0.950359	0.0669236	0	0	0	0.880972	0.591189	0.710928	0.288477	0.847161	0.222897	0.272329	0	0.683566	0.613444	0	0	0.605871	0	0	0.417146	0	0	0.725937	0.788842	0.752171	0	0	1.01612	0.524608	1.06476	0.280043	0.632829	1.0749	1.24607	0.728521	1.56112	0	0.6048	1.085	0.500791
1.31062	0	0	0.212143	0.917481	0.391305	0	0	1.56861	1.22336	0.282911	0	0	0	1.32378	0.481009	1.08557	0.732025	0.503132	0.746185	0.867595	0	0.672473	0.974333	0	0	0.882903	0	0	0.331787	0	0	1.53471	1.15267	1.20288	0	0	1.64427	1.04872	0.930777	0.289539	0.902662	1.70357	2.36555	0.660127	1.37041	0	1.04413	1.10951	0.307587
0.257576	0	0	0.451916	0.194877	0.454148	0	0	0.450625	0.435293	0.443312	0	0	0	0.540393	0.479681	0.506775	0.339946	0.52218	0.574422	0.471693	0	0.551125	0.581836	0	0	0.517813	0	0	0.612905	0	0	0.350998	0.668701	0.421789	0	0	0.660223	0.385951	0.688099	0.141858	0.353305	0.60169	0.987934	0.742144	0.838487	0	0.600605	0.54409	0.455754
1.84956	0	0	1.36088	1.11878	0.913784	0	0	2.07827	1.40931	0.252352	0	0	0	0.8908	4.28163	1.08481	0.594897	2.29958	1.16103	1.13223	0	1.27668	1.60514	0	0	0.805751	0	0	3.41993	0	0	0.542214	2.21936	1.29465	0	0	1.96038	0.834665	3.68534	0.604145	1.3558	1.88025	1.96233	1.04063	2.91357	0	2.21083	2.99077	0.778655
0.377306	0	0	0.377361	0.663383	0.279924	0	0	0.870656	0.903286	0.271786	0	0	0	1.12454	0.85093	0.924811	0.780835	0.854044	0.624186	0.550771	0	0.932095	0.801207	0	0	0.666894	0	0	0.794945	0	0	0.668638	1.2261	1.10923	0	0	1.12131	0.641157	1.20807	0.381242	0.395207	0.998932	1.43249	0.803104	1.49317	0	0.446509	1.09938	0.628579
1.04448	0	0	0.27412	0.916287	0.636395	0	0	1.58885	0.582	0.161603	0	0	0	1.35174	1.27549	0.862884	0.375807	1.0619	0.403075	0.565947	0	0.581462	0.874296	0	0	0.981792	0	0	0.791316	0	0	1.25243	1.37214	0.782671	0	0	1.30774	1.02574	1.53685	0.14805	0.975359	1.1813	1.81639	0.724116	1.81034	0	0.698718	0.76743	0.511491
0.723762	0	0	0.869965	0.622453	0.626582	0	0	0.612644	1.05256	0.788488	0	0	0	1.46069	1.74432	0.539171	0.335227	0.887994	0.899113	1.05489	0	1.10302	1.35789	0	0	0.994265	0	0	1.37256	0	0	0.530884	1.20312	0.745215	0	0	0.595202	0.993635	1.54457	0.364956	0.446386	0.774643	1.57769	1.07002	1.15064	0	1.02786	1.16739	0.779474
0.812974	0	0	0.0828879	0.837755	0.283181	0	0	1.31892	0.472705	0.144831	0	0	0	0.644026	1.06702	0.852587	0.344146	0.705445	0.902963	0.674944	0	0.498955	0.697954	0	0	0.656678	0	0	0.738351	0	0	0.886088	0.860047	0.808604	0	0	1.18376	0.757143	1.23857	0.106055	0.807972	1.08884	1.39054	0.518499	1.61472	0	0.717707	1.10116	0.398099
1.10268	0	0	0.648172	0.638162	0.296909	0	0	1.65241	1.34727	0.175122	0	0	0	1.32703	1.08197	1.04556	0.310832	1.11394	0.661575	0.741228	0	0.689158	0.738191	0	0	0.5907	0	0	0.545814	0	0	1.84485	1.1627	1.03376	0	0	2.21368	0.924652	2.20911	0.180339	0.998554	1.54019	1.29052	0.706184	2.41625	0	1.1926	1.15436	0.491122
0.958613	0	0	0.828197	0.788452	0.39097	0	0	1.40244	0.933637	0.22235	0	0	0	0.470969	1.60284	0.752981	0.354571	1.5512	1.17523	0.437817	0	0.826399	0.641165	0	0	0.374832	0	0	1.45595	0	0	0.953776	1.43594	0.547995	0	0	2.07525	0.559429	1.97215	0.401915	0.880748	1.73542	1.39831	0.78014	1.94511	0	1.27185	2.19189	0.453328
1.00062	0	0	0.574972	0.462731	0.444537	0	0	1.42843	1.72336	0.246101	0	0	0	1.4145	0.978891	1.07036	0.550394	1.13541	1.42379	0.833175	0	0.363087	0.735785	0	0	0.83424	0	0	0.767083	0	0	1.52097	1.27024	0.659895	0	0	2.2792	0.836575	2.15031	0.380785	0.851493	1.41961	1.47773	0.796674	2.31094	0	1.54282	1.76276	0.183264
1.2664	0	0	0.966941	0.477214	0.789774	0	0	2.14642	1.53391	0.204047	0	0	0	1.04609	3.23403	0.847997	0.721147	1.71688	0.902917	0.795358	0	1.00127	0.961076	0	0	0.99397	0	0	1.75395	0	0	1.53655	1.32156	1.71448	0	0	1.70281	0.998603	3.85315	0.552178	1.17536	0.719221	0.815486	1.03588	2.61894	0	2.00549	2.3419	0.627463
0.589224	0	0	0.590484	0.739947	0.451305	0	0	1.13834	1.48353	0.341147	0	0	0	0.745523	0.872194	0.489179	0.57903	0.758212	0.533591	0.631966	0	0.641429	0.693008	0	0	0.895716	0	0	0.52931	0	0	1.20057	0.727046	0.929687	0	0	0.936998	0.962916	1.07943	0.17872	0.408137	1.43859	1.28821	0.704716	1.65998	0	0.72353	1.98664	0.342141
0.499239	0	0	0.798503	0.50695	0.48448	0	0	0.832734	0.555206	0.264953	0	0	0	0.920743	0.79421	0.440265	0.34137	0.661909	0.946676	0.621592	0	0.965274	0.604058	0	0	1.04954	0	0	0.874748	0	0	0.823195	0.947767	0.593216	0	0	0.799726	0.47983	0.851683	0.432587	0.752475	0.915724	0.976175	0.401376	1.15468	0	0.724662	0.587223	0.289136
0.583454	0	0	0.350817	0.586091	0.671633	0	0	1.26918	1.08442	0.112827	0	0	0	0.657067	0.51542	0.460132	0.289714	1.27002	0.849815	0.398159	0	0.480032	0.608518	0	0	0.410595	0	0	0.421381	0	0	1.27142	0.983778	0.845605	0	0	1.38503	0.575555	1.40094	0.20662	0.316913	0.789692	1.40433	0.649612	1.23661	0	0.989017	1.21386	0.361424
0.365418	0	0	0.244013	0.188025	0.448904	0	0	0	0.818125	0.11213	0	0	0	0.705264	0.823916	0.464198	0.729228	0.797287	0.973957	0.415826	0	0.676148	0.541413	0	0	0.535971	0	0	0.915646	0	0	0.749739	1.35066	0.970065	0	0	0.817307	0.361421	0.942631	0.303436	0.534838	1.20407	1.42462	1.06557	1.10996	0	0.791696	1.20322	0.235895
1.05772	0	0	0.611204	0.728429	0.615076	0	0	2.20684	0.755907	0.457306	0	0	0	0.652219	2.24361	1.18153	0.563382	1.07701	0	1.34537	0	0.384123	0.759526	0	0	0.96544	0	0	0.778389	0	0	0.594704	0.870031	1.47936	0	0.77872	1.57026	1.14158	2.80032	0.452374	1.07242	0.795514	0.870272	0.778784	1.77056	0	0.598292	2.12159	0.462143
0.795171	0	0	1.0011	0.78451	0.830877	0	0	2.8655	1.19836	0.407126	0	0	0	0.791181	3.71721	0.91761	1.0719	1.3295	0.501016	1.41874	0	0.512942	0.852572	0	0	1.71964	0	0	1.70069	0	0	0.8561	0.830767	1.86975	0	0	1.59803	1.44971	3.58055	0.528992	1.27642	0.488139	0.462759	0.624424	2.40765	0	1.20088	2.52681	0.664192
0.754515	0	0	1.14426	0.704674	0.667517	0	0	2.26253	0.875837	0.472906	0	0	0	1.07384	2.98876	1.12186	0.419496	1.60446	0.781683	1.37768	0	0.579419	0.986819	0	0	0.904994	0	0	1.90322	0	0	0.911139	1.81951	0.922227	0	0	2.66444	1.01901	3.65002	0.409372	1.66394	1.32803	1.16001	0.596117	2.70622	0	1.78778	2.05371	0.764943
0.987398	0	0	0.221286	0.716271	0.232046	0	0	1.09708	0.529609	0.149969	0	0	0	0.956173	0.630688	0.925808	0.437883	0.335405	0.573906	0.681925	0	0.255505	0.711815	0	0	0.541995	0	0	0.324695	0	0	1.00273	0.592052	0.657293	0	0	1.79945	0.744799	1.30016	0.116012	0.941238	1.3255	0.978649	0.584078	1.72303	0	0.315812	1.02431	0.299034
0.808602	0	0	0.516806	1.19035	0.918228	0	0	1.45531	1.51919	0.344297	0	0	0	1.69653	0.911205	0.740971	0.733238	0.72628	1.74258	0.642157	0	0.981929	0.639818	0	0	0.913487	0	0	0.840437	0	0	1.28523	1.58044	1.03646	0	0	1.07682	0.952259	0.994183	0.139366	1.45486	1.06113	1.74831	0.889401	1.96806	0	1.53866	1.37475	0.99409
0.944255	0	0	0.368319	0.73699	0.562229	0	0	1.63343	0.620535	0.0942111	0	0	0	0.520215	1.62141	0.544302	0.490559	0.987333	0.371695	0.753991	0	0.785693	0.752047	0	0	0.580147	0	0	0.944227	0	0	0.787811	0.966954	0.933364	0	0	1.21907	0.768278	1.88647	0.195542	0.929193	1.00274	1.1385	0.481599	1.54308	0	0.794287	1.42895	0.15368
0.551864	0	0	0.537427	1.23727	0.621528	0	0	0.9895	1.22498	0.341101	0	0	0	1.27912	0.529733	0.787062	0.51253	0.589559	0.649942	0.501528	0	1.05319	0.798982	0	0	0.916488	0	0	0.47386	0	0	0.99243	0.921052	1.17255	0	0	0.893386	0.732236	0.731086	0.27337	0.688882	1.16116	1.81168	1.16554	1.62675	0	0.94411	1.1085	0.559651
0.562911	0	0	0.709354	0.554744	0.454543	0	0	1.11472	0.974331	0.556341	0	0	0	1.34653	0.689172	0.0917678	0.56829	0.902589	0.789777	0.921672	0	0.869104	0.725704	0	0	0.729024	0	0	1.01966	0	0	1.06944	1.66628	0.710263	0	0	0.412426	0.906095	0.874004	0.315164	0.572122	0.555702	1.4855	1.07851	1.42842	0	0.993413	0.774278	0.576812
0.366355	0	0	0.204777	0.233273	0.138371	0	0	0.269389	0.227153	0.230521	0	0	0	0.77709	1.26771	0.155482	0.415561	0.0893726	0.0863615	0.234795	0	0.338472	0.204604	0	0	0.3453	0	0	1.08363	0	0	0.30289	0.410161	0.223399	0	0	0.0951733	0.137727	0.648895	0.21116	0.474073	0.275759	0.0887784	0.339776	0.235543	0	0.128697	0.380688	0.191641
0.189137	0	0	0.11889	0.192912	0.191525	0	0	0.167556	0.205478	0.176149	0	0	0	0.374511	0.126999	0.11048	0.238288	0.141775	0.148376	0.227416	0	0.166184	0.140588	0	0	0.268323	0	0	0.545146	0	0	0.172878	0.141184	0.134983	0	0	0.203317	0.116424	0.199039	0.0883225	0.288335	0.287368	0.130066	0.163327	0.172055	0	0.190988	0.218589	0.17792
0.15724	0	0	0.169979	0.135398	0.0946066	0	0	0.206009	0.0756671	0.125483	0	0	0	0.287031	0.187824	0.110477	0.222372	0.0927423	0.113301	0.159322	0	0.140621	0.139653	0	0	0.169002	0	0	0.431049	0	0	0.159273	0.180488	0.237822	0	0	0.174091	0.182153	0.266283	0.134367	0.271414	0.176199	0.117113	0.159566	0.190939	0	0.0795794	0.27955	0.244169
0.249837	0	0	0	0.0447939	0.148867	0	0.548699	0.149374	0.195416	0.201174	0	0	0	0.178211	0	0.173815	0.253279	0.126709	0.230366	0.1909	0	0.187987	0.125141	0	0	0.29749	0	0	0.156711	0	0	0.253984	0.106748	0.192387	0	0	0.180746	0.196249	0.173207	0.116619	0.150688	0.033211	0.226194	0.263054	0.123573	0	0.343308	0.119335	0.127948
0.409802	0	0	0.101395	0.181824	0.147698	0	0.0934379	0.134685	0.201409	0.0878843	0	0	0	0.272175	0	0.14201	0.294478	0.256563	0.312352	0.230485	0	0.149076	0.118731	0	0	0.340614	0	0	0.406765	0	0	0.174847	0.377921	0.282699	0	0	0.318853	0.325483	0.124055	0.260022	0.319846	0.467371	0.313629	0.275216	0.273429	0	0.21398	0.248945	0.195916
0.315065	0	0	0.156399	0.234518	0.286089	0	0	0.192437	0.200823	0.209797	0	0	0	0.461571	0.155339	0.125992	0.393237	0.446073	0.505002	0.297451	0	0.316412	0.163799	0	0	0.141915	0	0	0.555492	0	0	0.179211	0.797336	0.177542	0	0	0.222721	0.24604	0.194909	0.147932	0.359992	0.464546	0.441215	0.538009	0.422373	0	0.474401	0.351993	0.336411
0.337951	0	0	0.400254	0.130074	0.30317	0	0	0.473523	0.484297	0.278538	0	0	0	0.571747	0.278757	0.284603	0.315316	0.315511	0.252436	0.369368	0	0.377725	0.174668	0	0	0.315458	0	0	0.494011	0	0	0.234519	0.346055	0.251808	0	0	0.249118	0.183999	0.350937	0.242343	0.344167	0.466132	0.488818	0.530375	0.280426	0	0.397396	0.47271	0.198124
0.450027	0	0	0.225883	0.0851181	0.416621	0	0	0.416909	0.436824	0.372736	0	0	0	0.354038	0.349236	0.154744	0.34666	0.480798	0.257606	0.339864	0	0.556827	0.455825	0	0	0.311165	0	0	0.394763	0	0	0.287194	0.486325	0.461488	0	0	0.476469	0.49773	0.445472	0.157492	0.299138	0.497536	0.432546	0.655488	0.499067	0	0.550973	0.497	0.352841
0.40145	0	0	0.0957837	0.106002	0.226295	0	0	0.399715	0.250944	0.221728	0	0	0	0.477695	0.286645	0.438311	0.416929	0.275173	0.176479	0.321345	0	0.388023	0.321404	0	0	0.520738	0	0	0.262336	0	0	0.369054	0.219274	0.363198	0	0	0.540102	0.483788	0.291311	0.374879	0.344585	0.481246	0.38805	0.478335	0.366203	0	0.347125	0.244397	0.489123
0.321157	0	0	0.472943	0.0589973	0.300752	0	0	0.671031	0.43023	0.387062	0	0	0	0.192085	0.658099	0.420706	0.230389	0.594042	0.310982	1.12772	0	0.582213	0.585361	0	0	0.495928	0	0	0.447482	0	0	0.593469	0.397924	0.534217	0	0	0.57839	0.74879	0.863833	0.331239	0.120527	0.547696	0.579101	0.847381	0.408437	0	0.292325	0.623175	0.271311
0.32602	0	0	0.330172	0.365537	0.468497	0	0	0.517013	0.846574	0.0782215	0	0	0	0.874694	0.428245	0.367483	0.338665	0.657886	0.101778	0.754785	0	0.324116	0.327874	0	0	0.537151	0	0	0.412288	0	0	0.278761	0.964765	0.923647	0	0	0.382211	0.575712	1.11015	0.398406	0.520493	0.548309	0.659687	0.476586	0.582727	0	0.722468	0.693601	0.541632
0.471948	0	0	0.384661	0.639165	0.521282	0	0	0.741344	0.930778	0.191612	0	0	0	0.810954	0.205968	0.29078	0.635651	0.705533	1.01656	0.333333	0	0.738614	0.504089	0	0	0.75739	0	0	0.484843	0	0	1.09232	1.17859	0.964202	0	0	0.716532	0.451594	0.572065	0.226682	0.408323	0.814458	1.49794	0.523239	1.21943	0	0.785953	0.886648	0.583333
0.293501	0	0	0.301272	0.401414	0.52081	0	0	0.403461	0.616593	0.0637838	0	0	0	1.04231	0.102942	0.445981	0.571752	0.888206	1.19181	0.189406	0	0.680591	0.439646	0	0	0.373563	0	0	0.444339	0	0	0.777734	1.13234	0.516934	0	0	0.681897	0.204786	0.599576	0.0579548	0.362115	0.671442	1.3852	0.478771	1.06758	0	0.920182	0.665336	0.240421
0.491455	0	0	0.389451	0.0149038	0.303593	0	0	0.843109	0.605539	0.213135	0	0	0	0.926358	0.412983	0.422815	0.991545	0.858062	1.13188	0.26444	0	0.412281	0.0727402	0	0	0.416736	0	0	0.758711	0	0	1.00857	1.37878	0.846302	0	0	0.60557	0.392538	0.62864	0.132703	0.248394	0.913311	1.65503	0.607458	1.00969	0	0.882077	0.870721	0.266578
0.531223	0	0	0.859758	0.684432	0.809287	0	0	0.727995	1.10714	0.38074	0	0	0	1.36088	0.862776	0.501101	0.829606	0.798455	0.516763	0.56217	0	0.823897	0.402096	0	0	0.703897	0	0	0.982501	0	0	0.302931	1.65485	1.44224	0	0	0.625394	0.775816	1.01203	0.396177	1.2899	1.14954	1.87544	1.10581	1.4738	0	1.03965	1.23305	0.673345
1.08737	0	0	0.569796	0.757693	0.464711	0	0	1.33034	1.41859	0.213446	0	0	0	1.61171	0.994814	1.02718	0.690416	0.706707	1.08515	0.837487	0	0.552055	0.910588	0	0	0.689915	0	0	0.384755	0	0	1.57501	1.03966	0.997596	0	0	2.12855	0.726392	1.68363	0.307437	0.912169	1.55842	1.78287	0.90794	1.98396	0	0.708116	1.70013	0.168938
1.05817	0	0	0.833667	0.544078	0.652764	0	0	1.09337	1.76805	0.273602	0	0	0	0.73165	1.38089	0.578072	0.0767446	1.78927	1.35835	0.243416	0	1.16292	0.748636	0	0	0.784318	0	0	1.22995	0	0	1.97948	1.25713	0.905986	0	0	1.58743	0.452886	1.89276	0.223765	0.269996	1.43241	1.70869	1.04472	1.86385	0	1.62828	2.2941	0.244359
1.00795	0	0	0.374407	0.566507	0.330732	0	0	1.09922	1.12288	0.305398	0	0	0	0.698084	1.32014	0.802722	0.488812	0.984592	1.29063	0.607297	0	0.621089	0.584788	0	0	0.787939	0	0	1.11784	0	0	0.877791	1.01412	0.569184	0	0	1.99178	0.649069	1.88625	0.184582	1.01881	1.14593	1.28304	0.786089	2.26953	0	1.35838	1.03428	0.305499
0.940317	0	0	0.281442	0.455906	0.505289	0	0	1.33183	0.561517	0.128052	0	0	0	1.26511	0.653394	0.819938	0.318008	1.09193	1.10507	0.453929	0	0.653275	0.841877	0	0	0.775328	0	0	0.640232	0	0	1.28598	1.03049	0.606021	0	0	1.39678	0.632211	1.21034	0.0343781	0.612917	0.896684	1.65586	0.306211	1.88745	0	1.26796	0.887982	0.246615
0.601776	0	0	0.445271	0.831173	0.949925	0	0	1.1139	2.4126	0.35331	0	0	0	1.28855	0.679645	0.687555	0.888031	1.24223	1.13215	0.503657	0	0.861514	0.942532	0	0	1.15643	0	0	0.520556	0	0	1.41879	1.00779	1.17411	0	0	1.4756	0.855258	1.24428	0.390537	0.557163	1.24889	2.23307	1.28553	1.69081	0	1.00276	1.5111	0.494255
0.419295	0	0	0.493997	0.163537	0.298696	0	0	0.630053	0.392076	0.54279	0	0	0	0.572817	0.040806	0.733828	0.526648	0.364652	0.0577526	0.844206	0	0.465907	0.524695	0	0	0.489459	0	0	0.35971	0	0	0.443804	0.255035	0.617923	0	0	0.482144	0.949877	0.34196	0.226339	0.673448	0.594724	0.738684	0.216633	0.690135	0	0.33796	0.389557	0.577056
0.491926	0	0	0.706521	0.271959	0.636092	0	0	1.03659	0.663452	0.0890608	0	0	0	1.30009	1.92751	0.247427	0.479001	1.23442	1.33767	0.371722	0	0.998534	0.629268	0	0	0.634351	0	0	1.86147	0	0	0.850742	1.28925	0.252922	0	0	1.27441	0.325695	1.77136	0.159459	0.692404	0.42695	0.986072	0.414933	1.94344	0	1.28443	1.04234	0.633113
0.654954	0	0	0.269397	0.561583	0.520001	0	0	1.30632	0.502536	0.172778	0	0	0	0.570826	1.44179	0.659106	0.300495	1.30505	0.87999	0.641686	0	0.466738	0.663409	0	0	0.529864	0	0	1.26908	0	0	0.76587	1.15043	0.516331	0	0	1.43081	0.528457	1.8401	0.348524	0.782881	1.15386	1.27361	0.69909	1.49764	0	1.15976	1.55217	0.231368
1.39949	0	0	1.09862	0.847536	0.863162	0	0	2.32374	0.678163	0.335418	0	0	0	0.693575	4.19171	0.891701	0.321165	2.28836	1.23425	0.89654	0	1.48858	1.05447	0	0	0.901935	0	0	3.11282	0	0	0.66721	2.1029	1.14487	0	0	2.24212	0.702881	4.08437	0.588224	1.2535	1.24479	1.47713	0.859636	2.74956	0	2.3155	2.95272	0.686613
1.17348	0	0	1.24327	0.647289	0.333072	0	0	1.52377	1.30021	0.358494	0	0	0	0.681539	2.68127	0.836637	0.754807	1.54383	1.97342	0.476197	0	1.00868	0.822517	0	0	0.671554	0	0	2.22503	0	0	0.430804	1.65604	0.507948	0	0	2.79232	0.720789	3.00277	0.517699	1.33291	1.18844	1.24574	1.01037	3.15538	0	1.45999	1.8762	0.611349
0.408868	0	0	0.39147	0.573262	0.339752	0	0	0.65237	0.894133	0.239509	0	0	0	0.978403	0.625607	1.0181	0.363573	0.942442	0.952001	0.266182	0	0.412627	0.732807	0	0	0.752786	0	0	0.490884	0	0	1.42114	0.946364	0.851852	0	0	1.90785	0.620857	1.20182	0.2615	0.726844	1.40626	1.18982	0.765187	1.70431	0	0.537497	1.6904	0.571296
0.889556	0	0	0.319164	0.730463	0.716505	0	0	1.33308	1.09808	0.0240627	0	0	0	1.31482	1.34031	0.515417	0.177842	1.67783	2.42289	0.331521	0	1.12093	0.778458	0	0	0.97406	0	0	1.38419	0	0	1.95044	1.32907	0.756625	0	0	1.75569	0.669412	1.57004	0.306489	0.159314	1.44063	1.90677	0.850446	2.71486	0	1.70993	1.85235	0.622582
0.823505	0	0	0.182676	0.680001	0.369339	0	0	1.30452	0.934493	0.192767	0	0	0	0.984848	0.722171	0.995935	0.29691	0.711891	0.0266974	0.537958	0	0.489519	1.0206	0	0	0.496734	0	0	0.314264	0	0	1.17427	0.726719	0.78636	0	0	1.51424	0.781888	1.45087	0.181846	0.747817	1.30969	1.57021	0.827504	1.51363	0	0.317253	1.15649	0.490214
0.469956	0	0	0.649941	0.476836	0.726248	0	0	1.26344	0.510841	0.184483	0	0	0	1.04063	0.93996	0.867791	0.463147	0.742974	0.325258	1.01729	0	0.293766	0.840698	0	0	0.833919	0	0	0.55223	0	0	0.865818	1.15346	1.08062	0	0	1.21065	0.991069	1.62804	0.434862	0.841337	1.12466	1.23291	0.573306	1.67416	0	0.659502	0.729094	0.45488
0.710089	0	0	0.664137	0.741904	0.498234	0	0	1.85967	0.910137	0.291429	0	0	0	0.781363	2.2144	1.06127	0.868456	0.972303	0.784681	0.976467	0	0.414249	0.662564	0	0	1.17359	0	0	0.812912	0	0	0.85747	1.17962	1.50997	0	0	1.97923	1.0885	2.46132	0.333482	1.40965	1.24546	0.832261	0.80636	2.627	0	0.777027	2.05262	0.52696
0.817322	0	0	0.148677	0.718369	0.262576	0	0	0.972652	0.676313	0.0905034	0	0	0	1.09322	0.979345	0.991964	0.743282	0.729874	0	0.539224	0	0.767717	0.629812	0	0	0.512106	0	0	0.544199	0	0	0.558786	0.854088	0.714898	0	0.0161192	1.13496	0.803971	1.33022	0.149939	0.705774	1.023	1.53656	0.804296	1.34448	0	0.234606	1.20188	0.395635
1.91234	0	0	1.29841	0.94999	0.644062	0	0	2.0566	1.90242	0.429563	0	0	0	1.691	3.30938	1.3595	1.58017	1.45577	0.753409	1.45957	0	0.542647	1.4747	0	0	0.459025	0	0	2.13401	0	0	0.688256	2.44365	2.01666	0	0	0.999637	1.56259	2.97046	0.496925	1.78451	1.2718	1.50137	1.78476	2.28231	0	1.57596	2.59347	0.734507
0.390906	0	0	0.361667	0.409602	0.631157	0	0	0.687094	0.646566	0.0404886	0	0	0	1.01864	0.781933	0.57473	0.626225	0.624131	0	0.674603	0	0.464908	0.61783	0	0	0.815599	0	0	0.588558	0	0	0.597259	0.544176	0.815254	0	0.0220958	0.7026	0.591365	1.22234	0.336809	0.452703	0.644735	1.12343	0.385397	1.16961	0	0.701714	0.569051	0.442423
1.00815	0	0	0.629422	1.12905	0.788139	0	0	2.30149	0.948493	0.204101	0	0	0	1.23249	2.88552	0.991636	0.451696	1.69751	0.92389	1.12416	0	1.19628	0.882397	0	0	0.881676	0	0	2.06692	0	0	1.39035	1.92902	1.01369	0	0	2.45658	0.86487	3.3273	0.429953	1.131	1.51092	1.76235	1.0106	2.50656	0	1.85933	2.23143	0.698265
1.1656	0	0	0.992517	0.905985	0.625875	0	0	1.81175	0.853783	0.593124	0	0	0	0.581801	3.70692	0.75264	0.169939	2.13577	1.59943	0.76568	0	1.1934	0.902445	0	0	0.647601	0	0	3.03815	0	0	0.895349	1.84643	1.09123	0	0	1.98488	0.519687	3.37465	0.376034	0.937408	1.41092	1.53416	0.661102	2.42663	0	2.27168	2.71757	0.859967
0.838149	0	0	0.801349	0.718152	0.428183	0	0	1.42173	0.792644	0.218822	0	0	0	0.587128	1.50927	0.832754	0.248229	1.35134	0.81996	0.705042	0	0.539374	0.69086	0	0	0.500753	0	0	1.17542	0	0	0.926177	1.16297	0.678986	0	0	2.03525	0.641533	2.18156	0.362383	0.787056	1.37165	1.3389	0.651862	1.87384	0	1.27445	2.0791	0.321636
1.19067	0	0	0.574265	0.464359	0.514965	0	0	1.32381	1.71976	0.131692	0	0	0	1.9452	0.943211	1.18256	0.627026	1.04279	1.08167	0.778325	0	0.282849	0.833692	0	0	0.705595	0	0	0.655895	0	0	1.95839	1.19072	0.828986	0	0	2.36777	0.787958	2.13126	0.285433	0.737138	1.46127	1.46454	0.646201	2.09594	0	1.39237	1.37426	0.348514
0.93413	0	0	0.593233	0.382992	0.647281	0	0	1.9248	1.24502	0.212542	0	0	0	0.784114	2.4849	0.809069	0.709132	1.11578	0.299163	0.881641	0	0.556931	0.59362	0	0	0.936069	0	0	1.19779	0	0	1.0609	0.946233	1.56722	0	0	1.32143	1.03655	3.13907	0.473136	1.20377	0.418779	0.40604	1.21881	2.17235	0	1.3809	1.77057	0.59842
0.864437	0	0	0.851847	1.11958	0.634668	0	0	1.39729	1.8265	0.494397	0	0	0	0.912278	2.20452	0.637638	0.432665	1.39088	1.69012	0.511436	0	1.08218	1.23172	0	0	1.15954	0	0	1.84464	0	0	1.8203	1.52624	0.907043	0	0	1.48278	0.810227	1.70852	0.340701	0.799945	2.05976	2.10447	1.18721	2.19898	0	1.36656	2.79185	0.683691
0.609667	0	0	0.526053	0.186241	0.359713	0	0	0.835574	0.360192	0.464282	0	0	0	0.588795	0.943936	0.521808	0.524842	0.556157	0.795033	0.655007	0	0.381411	0.4188	0	0	0.691773	0	0	0.596359	0	0	0.649039	0.638123	0.725196	0	0	0.778578	0.728323	0.912491	0.237442	0.481537	0.819799	0.78379	0.371147	1.1229	0	0.541499	0.607436	0.354162
0.736514	0	0	0.347046	0.473017	0.442674	0	0	1.46753	0.948917	0.243748	0	0	0	0.472913	1.5568	0.7449	0.25223	1.36116	1.46804	0.843784	0	0.626457	0.557434	0	0	0.830942	0	0	1.27738	0	0	0.891205	1.10021	0.72966	0	0	1.65001	0.528941	2.04165	0.369285	0.368787	0.728122	1.28184	0.753725	1.69606	0	1.18692	1.92141	0.223408
0.365987	0	0	0.367705	0.178234	0.165661	0	0	0.625115	0.659333	0.696986	0	0	0	0.725072	0.302831	0.581107	0.602933	0.634978	0.668647	0.931142	0	0.366478	0.63335	0	0	0.537271	0	0	0.596981	0	0	0.61904	0.768596	0.763764	0	0	0.417549	0.635217	0.755991	0.138453	0.513566	0.807358	0.605866	0.605119	0.668878	0	0.487671	0.82283	0.202673
0.507752	0	0	1.01	1.00868	0.954255	0	0	2.87944	0.873624	0.652132	0	0	0	1.10455	3.34309	1.48236	0.867261	1.31745	0.12735	1.88202	0	0.367089	0.94391	0	0	1.46122	0	0	1.69995	0	0	0.934303	1.14604	1.76223	0	0	1.55105	1.52077	3.2939	0.628391	1.64337	0.962795	0.712577	0.446647	1.94129	0	1.48546	2.64857	0.768248
0.751406	0	0	0.715546	0.568759	0.639985	0	0	1.51479	1.01848	0.613973	0	0	0	0.812104	3.01775	0.532956	0.704872	1.47554	1.21972	0.557914	0	0.881602	0.956539	0	0	1.31439	0	0	2.26499	0	0	0.601218	0.995418	0.812904	0	0	1.28526	0.876896	2.28411	0.474889	0.833972	0.563869	1.03235	0.75051	1.65763	0	1.04294	1.83534	0.728946
1.31184	0	0	1.38174	0.978934	0.95768	0	0	2.46058	0.780768	0.386567	0	0	0	0.966246	4.86608	0.940378	0.456267	2.20518	0.82954	1.18137	0	1.35876	1.24836	0	0	0.881222	0	0	3.24602	0	0	0.454963	2.07929	1.36022	0	0	2.02578	1.03479	4.41081	0.59751	1.56273	1.00142	1.30727	0.880857	2.64069	0	2.33908	3.30933	0.881565
1.0535	0	0	0.788666	0.494736	0.556751	0	0	1.82553	2.22458	0.167333	0	0	0	2.05241	1.82259	1.22587	0.808457	1.36423	0.168781	1.03188	0	0.367567	1.064	0	0	0.722205	0	0	0.596977	0	0	1.98509	1.45559	1.66933	0	0	2.40434	1.42137	3.59936	0.351843	1.2004	1.03899	1.12663	1.18778	2.65708	0	1.70742	1.73697	0.314193
0.509711	0	0	0.355695	0.639113	0.458871	0	0	0.711451	0.548376	0.3288	0	0	0	1.09667	0.477654	0.558417	0.251377	0.440324	0.871002	0.544215	0	0.422884	0.316986	0	0	0.628407	0	0	0.719311	0	0	0.600308	1.02934	0.55989	0	0	0.628936	0.47244	0.598876	0.294133	0.830277	0.743473	1.18688	0.28353	0.890655	0	1.13232	0.930467	0.556846
1.10402	0	0	0.355945	0.652664	0.380696	0	0	1.62816	0.790209	0.240105	0	0	0	0.945892	1.12433	1.03979	0.428794	0.910789	1.0678	0.693636	0	0.607135	0.818182	0	0	0.639546	0	0	0.724311	0	0	1.2025	1.15274	0.676852	0	0	1.78554	0.648539	1.80234	0.108003	0.802213	1.30484	1.28435	0.501027	2.10691	0	1.08048	1.26115	0.0757576
0.869806	0	0	0.482547	0.898433	0.265315	0	0	1.20638	1.21142	0.21761	0	0	0	0.634904	0.633563	0.795923	0.365736	0.72157	0.373871	0.644883	0	0.56112	0.575562	0	0	0.38951	0	0	0.650004	0	0	1.09457	0.914101	0.751367	0	0	1.41964	0.668461	1.11615	0.264804	0.826144	1.71473	1.26948	1.08152	1.79233	0	0.7394	1.54939	0.203187
0.765986	0	0	0.612006	0.530732	0.650695	0	0	0.645085	0.774055	0.3713	0	0	0	1.29634	1.07731	0.925096	0.382006	1.39227	2.42036	0.937833	0	0.655245	1.10609	0	0	1.13528	0	0	1.08578	0	0	1.23308	1.35152	1.28682	0	0	1.64121	0.657281	1.38084	0.148646	0.320621	0.84845	1.7005	0.496233	2.20622	0	1.20759	1.9471	0.451858
0.409837	0	0	0.214597	0.244842	0.138642	0	0	0.3063	0.236742	0.186063	0	0	0	0.76731	1.24892	0.146949	0.432543	0.118189	0.064734	0.204839	0	0.336818	0.216886	0	0	0.364123	0	0	1.0695	0	0	0.284972	0.438983	0.251912	0	0	0.0981701	0.172957	0.655414	0.200916	0.470849	0.30817	0.0443932	0.409629	0.265085	0	0.171881	0.393822	0.231881
0.180467	0	0	0.149957	0.21909	0.145496	0	0.140364	0.162959	0.233726	0.187598	0	0	0	0.384007	0	0.0530852	0.145532	0.115392	0.0250721	0.183369	0	0.120667	0.0970503	0	0	0.143844	0	0	0.40624	0	0	0.144873	0.211696	0.116832	0	0	0.115673	0.169666	0.178907	0.0809444	0.192312	0.138666	0.182694	0.309158	0.164205	0	0.211003	0.250903	0.261772
0.141371	0	0	0.090047	0.103269	0.066059	0	0.252851	0.109905	0.0656155	0.0759085	0	0	0	0.209293	0	0.0910379	0.195754	0.0513512	0.0935042	0.0525727	0	0.110141	0.099311	0	0	0.131331	0	0	0.223493	0	0	0.109096	0.11947	0.175452	0	0	0.125123	0.0947291	0.13173	0.0950364	0.172033	0.135573	0.121344	0.117032	0.101475	0	0.141392	0.12812	0.150224
0.285356	0	0	0	0.012005	0.157123	0	0.521492	0.223023	0.229589	0.167954	0	0	0	0.234594	0	0.215826	0.190698	0.202397	0.1877	0.155972	0	0.261289	0.177546	0	0	0.241513	0	0	0.170013	0	0	0.303045	0.134606	0.199385	0	0	0.246295	0.174055	0.228117	0.185523	0.0891278	0	0.236834	0.259471	0.176714	0	0.385761	0.06529	0.159314
0.363005	0	0	0.212269	0.253647	0.102522	0	0.00924945	0.26225	0.106919	0.270961	0	0	0	0.29406	0.000323742	0.159862	0.235082	0.272538	0.370629	0.231656	0	0.460446	0.134567	0	0	0.198794	0	0	0.425178	0	0	0.257721	0.332063	0.155455	0	0	0.271147	0.27858	0.200406	0.204278	0.261341	0.367861	0.352596	0.32365	0.367986	0	0.21267	0.356117	0.27968
0.375814	0	0	0.321974	0.26888	0.35581	0	0	0.385806	0.36922	0.278445	0	0	0	0.41263	0.267321	0.391831	0.446717	0.298512	0.353934	0.475117	0	0.206344	0.443851	0	0	0.254846	0	0	0.567278	0	0	0.275368	0.248097	0.400185	0	0	0.21863	0.494192	0.242296	0.102324	0.521955	0.497905	0.360738	0.160777	0.248642	0	0.384368	0.632697	0.194403
0.337376	0	0	0.48761	0.308679	0.387872	0	0	0.572418	0.347119	0.147409	0	0	0	0.546164	0.517286	0.221274	0.378228	0.808506	1.03466	0.382047	0	0.66793	0.316678	0	0	0.588929	0	0	0.803346	0	0	0.718558	1.04133	0.465133	0	0	0.427078	0.365291	0.400434	0.198128	0.384605	0.56495	0.959894	0.459912	0.740161	0	1.04346	0.336557	0.285538
0.402347	0	0	0.356235	0.188315	0.498438	0	0	0.567873	0.430735	0.499379	0	0	0	0.45821	0.42415	0.417617	0.284243	0.437899	0.19921	0.586301	0	0.488457	0.545204	0	0	0.535931	0	0	0.224809	0	0	0.430232	0.444245	0.240792	0	0	0.507732	0.64598	0.468411	0.205454	0.35837	0.55601	0.354779	0.550326	0.606454	0	0.424149	0.292546	0.394852
0.289367	0	0	0.446692	0.288271	0.425316	0	0	0.609091	0.591652	0.256298	0	0	0	0.377913	0.336434	0.585405	0.458432	0.446867	0	0.780066	0	0.514144	0.651119	0	0	0.702451	0	0	0.113618	0	0	0.384975	0.258611	0.622649	0	0.0447686	0.568859	0.77162	0.728103	0.240251	0.58617	0.650681	0.38692	0.468662	0.656112	0	0.456982	0.66505	0.302941
0.384977	0	0	0.381939	0.17235	0.404353	0	0	0.628117	0.247039	0.167221	0	0	0	0.317181	0.356419	0.380786	0.300472	0.267758	0.382825	0.703314	0	0.305743	0.184328	0	0	0.526706	0	0	0.479914	0	0	0.239668	0.721363	0.72809	0	0	0.415097	0.516067	1.0778	0.307709	0.547932	0.435491	0.379482	0.665927	0.69706	0	0.573496	0.277534	0.297201
0.28616	0	0	0.287342	0.379693	0.375878	0	0	0.550258	0.8705	0.262013	0	0	0	0.86644	0.546043	0.527911	0.530161	0.595277	0.352658	0.45664	0	0.658119	0.407811	0	0	0.580973	0	0	0.451377	0	0	0.570379	0.580507	0.758239	0	0	0.306418	0.662723	0.731504	0	0.363795	0.500468	0.878406	0.506465	0.933065	0	0.485651	0.730784	0.51474
1.53259	0	0	0.177284	0.962386	0.620886	0	0	1.03191	1.73556	0.136623	0	0	0	1.36094	1.20884	0.77585	0.275082	1.81716	2.14076	0.0167986	0	1.45155	0.934168	0	0	0.788245	0	0	1.55748	0	0	1.81401	1.18694	0.488513	0	0	1.74615	0.41884	1.50436	0.126846	0.127348	1.25883	2.16457	0.901929	2.60722	0	1.52418	0.868933	0.73064
0.542162	0	0	0.737593	0.588725	0.463475	0	0	0.753813	0.775402	0.435579	0	0	0	0.730602	1.44499	0.399628	0.25893	0.931679	1.16529	0.374788	0	0.869199	0.753619	0	0	0.814532	0	0	1.08114	0	0	0.613011	1.23614	0.87323	0	0	0.917973	0.447708	1.39417	0.267613	0.519096	1.01266	1.32287	0.902858	1.41705	0	1.04767	1.63278	0.240977
0.961919	0	0	0.246058	0.711959	0.414869	0	0	1.15737	1.44374	0.146907	0	0	0	1.1458	0.71855	0.916438	0.587078	0.760151	0	0.68656	0	0.414703	0.825809	0	0	0.325114	0	0	0.322394	0	0	1.20772	1.18427	1.01481	0	0.0135937	1.4813	0.618433	1.6654	0.309291	0.71581	0.923834	1.43536	1.10162	1.64713	0	0.69791	1.12146	0.271348
0.447702	0	0	0.525692	0.858741	0.518918	0	0	0.667738	1.35395	0.270588	0	0	0	0.782528	1.17281	0.506661	0.518868	1.11617	1.45154	0.247204	0	0.835423	0.640707	0	0	1.01561	0	0	0.872917	0	0	1.33659	0.862356	1.17177	0	0	1.48547	0.633302	1.22832	0.278363	0.638625	1.25419	1.39304	1.32092	2.08446	0	0.885917	2.03406	0.64977
1.41133	0	0	0.68785	0.704475	0.509716	0	0	1.84311	0.857057	0.290684	0	0	0	0.625494	3.24079	0.658427	0.517454	1.79683	1.90306	0.77412	0	0.86972	0.80469	0	0	0.938168	0	0	2.41877	0	0	1.198	1.43081	0.956643	0	0	2.0207	0.711151	2.89521	0.354074	1.09798	1.44557	1.23004	0.565262	2.57968	0	1.66023	2.47291	0.568132
1.21047	0	0	0.901571	0.987565	0.730462	0	0	2.14984	0.812591	0.156451	0	0	0	0.965873	3.25312	0.751519	0.231169	1.99915	1.34901	1.04867	0	0.967159	1.32288	0	0	0.63416	0	0	2.3461	0	0	0.887478	2.01217	1.00749	0	0	2.91454	0.897476	3.6645	0.570604	1.15846	1.48958	1.62254	0.780604	2.77947	0	1.95229	2.64064	0.658817
1.4742	0	0	1.07786	0.600357	0.445774	0	0	1.31975	2.52764	0.18503	0	0	0	1.15517	2.5073	1.00231	0.54242	2.15529	1.59656	0.303918	0	1.37734	1.10925	0	0	0.875714	0	0	2.19779	0	0	1.23464	1.86353	0.771149	0	0	2.91575	0.525302	3.43907	0.36792	1.11495	1.54158	1.77798	1.34684	3.19897	0	2.23465	1.76529	0.429698
0.790993	0	0	0.236135	0.730649	0.373721	0	0	1.33593	0.721525	0.214281	0	0	0	1.17257	1.40425	0.91575	0.500424	0.57039	0.0232962	0.49574	0	0.627667	0.937279	0	0	0.810938	0	0	0.837719	0	0	0.935677	1.28824	1.13352	0	0	0.732645	0.54599	1.43649	0.18011	0.364455	0.645113	1.55438	0.318551	1.42593	0	0.710865	0.724327	0.534015
0.705428	0	0	0.418295	0.434705	0.682899	0	0	0.973871	1.54544	0.153457	0	0	0	0.892851	1.21094	0.475357	0.212732	1.44277	1.68823	0.365831	0	0.69158	0.679885	0	0	0.520642	0	0	1.14645	0	0	1.14871	1.2288	0.623075	0	0	1.66061	0.328975	1.77475	0.241852	0.256455	0.730692	1.57753	0.878508	1.79999	0	1.41006	1.46175	0.202722
0.217488	0	0	0.358465	0.152667	0.244943	0	0	0.525021	0.491175	0.201129	0	0	0	0.546459	0.189793	0.459251	0.278754	0.319802	0.272521	0.436663	0	0.572294	0.617973	0	0	0.373031	0	0	0.323744	0	0	0.324317	0.413331	0.376706	0	0	0.254653	0.478084	0.314457	0.293968	0.316888	0.345986	0.620718	0.457218	0.441865	0	0.396677	0.464005	0.202555
0.760703	0	0	0.860248	0.629121	0.794496	0	0	1.12995	0.772292	0.381828	0	0	0	1.62676	2.72446	0.308991	0.547056	1.21049	1.0252	0.229104	0	1.38628	0.690848	0	0	0.835506	0	0	2.55713	0	0	0.888578	1.74953	0.483503	0	0	1.1811	0.393559	1.94568	0.604728	1.80671	0.79937	1.0105	0.978839	2.18654	0	1.81465	1.17644	1.03502
0.881989	0	0	0.805495	0.9296	0.920649	0	0	2.20601	0.924786	0.644864	0	0	0	0.81262	3.27807	0.588061	0.616509	1.48412	0.359741	0.810558	0	0.963497	1.12969	0	0	0.998176	0	0	2.10694	0	0	0.684305	1.20894	0.935602	0	0	1.32919	1.00915	2.97656	0.368919	1.30263	0.915051	1.19166	1.06367	1.84351	0	1.20272	2.5235	0.26111
1.11149	0	0	0.767627	0.867966	0.757787	0	0	1.68507	0.830896	0.415464	0	0	0	0.9212	3.66822	0.344169	0.288164	2.02323	0.999347	0.535586	0	1.42945	0.963385	0	0	0.613939	0	0	2.81888	0	0	0.670391	1.95886	1.01364	0	0	1.33345	0.474973	3.19849	0.432833	0.890716	0.830193	1.29132	1.01391	2.04146	0	1.93279	2.38283	0.575813
0.917777	0	0	1.05389	0.316826	0.488029	0	0	1.23506	1.26247	0.231405	0	0	0	1.25147	2.33653	0.707589	0.525427	1.15955	1.19563	0.538028	0	0.622058	0.920387	0	0	0.52071	0	0	1.71056	0	0	0.505049	1.28449	0.639764	0	0	1.92155	0.60757	2.70367	0.244272	1.2028	0.583317	0.87549	0.685614	2.46475	0	1.22665	1.2871	0.365979
0.794496	0	0	0.406589	0.74625	0.309871	0	0	1.14973	1.05153	0.330995	0	0	0	0.683619	0.794395	0.81123	0.70475	0.962421	1.06937	0.444632	0	0.480852	0.587794	0	0	0.875673	0	0	0.507682	0	0	1.34825	0.791232	0.953358	0	0	1.67176	0.856019	1.14169	0.157361	0.901817	1.32499	1.06355	0.727961	1.73809	0	0.563756	1.25174	0.495816
0.63053	0	0	0.767194	0.525074	0.30652	0	0	0.951334	1.2559	0.229418	0	0	0	0.424372	1.51152	0.52805	0.200939	1.2588	1.79834	0.426229	0	0.75691	0.563696	0	0	0.49288	0	0	1.45202	0	0	0.960636	0.98323	0.543349	0	0	1.63131	0.359389	1.79625	0.240542	0.441301	1.14806	1.32751	0.834363	1.87466	0	1.46441	1.80474	0.30173
0.947289	0	0	1.13417	0.878397	0.936388	0	0	2.4176	1.62845	0.449498	0	0	0	0.845439	2.81017	1.19168	0.514875	1.69117	0.15422	1.35975	0	0.453733	0.988945	0	0	1.08793	0	0	0.989015	0	0	1.30425	0.984222	1.74961	0	0	2.13292	1.09128	3.48456	0.560775	1.09609	1.11623	1.15308	1.05127	2.1684	0	0.959244	2.66187	0.360332
0.851199	0	0	0.19952	0.540175	0.620328	0	0	0.587986	0.730183	0.278984	0	0	0	0.792262	1.95365	0.463957	0.0706699	1.57762	2.61278	0.537325	0	1.12497	0.970469	0	0	1.06938	0	0	2.30322	0	0	1.16898	1.44338	0.415804	0	0	1.53976	0.671816	1.82419	0.44178	0.433976	1.43886	2.19172	1.10989	2.03749	0	1.59863	2.3767	0.722562
1.71908	0	0	1.49509	1.32681	1.61493	0	0	2.2343	1.3424	0.390422	0	0	0	1.17721	4.42917	1.15218	1.29476	1.53269	0.777072	0.746661	0	1.49097	0.957001	0	0	1.60474	0	0	2.54558	0	0	0.590777	2.47007	2.02062	0	0	1.89634	0.622511	3.64372	0.519223	1.7589	0.970719	1.11145	1.93849	3.13042	0	1.91858	3.10985	1.1844
1.00609	0	0	1.37423	0.854027	0.816157	0	0	1.72674	1.68295	0.203707	0	0	0	1.48698	3.34275	0.973417	0.711108	1.32993	0.0763978	1.0914	0	0.942847	1.10549	0	0	0.594233	0	0	1.82199	0	0	0.738522	1.47652	1.43491	0	0	1.37435	0.952621	3.47254	0.579948	1.05689	0.619894	1.41254	1.1683	1.9129	0	1.20348	2.62435	0.684765
0.752639	0	0	1.10032	0.601857	0.373428	0	0	1.45298	0.549433	0.62182	0	0	0	0.686528	2.29648	0.579668	0.44946	0.679707	1.07556	1.04962	0	0.662931	0.678543	0	0	1.35808	0	0	1.61646	0	0	0.460918	0.742601	0.722531	0	0	0.831427	1.06725	1.7767	0.675232	0.814254	0.843153	1.07311	0.436587	1.1734	0	0.743445	1.93212	0.763896
0.385798	0	0	0.456648	0.617228	0.589012	0	0	0.766162	1.21131	0.221049	0	0	0	0.60742	1.05916	0.41722	0.8713	0.640269	0.391522	0.505381	0	0.431543	0.296159	0	0	0.962867	0	0	0.580418	0	0	0.795437	0.620747	0.974485	0	0	0.972728	0.69323	1.25079	0.163922	0.833968	1.12065	0.81282	0.77336	1.32031	0	0.688097	1.14969	0.0596224
0.677227	0	0	0.3209	0.619392	0.245479	0	0	1.355	0.447102	0.342949	0	0	0	0.918813	1.74987	0.746645	0.625577	0.597063	0.699887	0.795112	0	0.423159	0.657178	0	0	0.870951	0	0	0.870314	0	0	0.741992	1.02062	0.975291	0	0	1.48709	0.87887	1.872	0.133382	1.07779	0.936251	0.905662	0.392126	1.85052	0	0.571486	1.15474	0.32935
1.16036	0	0	0.630769	0.754695	0.69238	0	0	1.48653	0.267683	0.429024	0	0	0	0.675658	3.6933	0.442122	0.67516	1.30189	1.32947	0.863427	0	0.785601	0.917719	0	0	1.10296	0	0	2.63774	0	0	0.498238	1.28034	1.28881	0	0	1.41236	1.03722	2.61328	0.526433	0.97854	0.990385	0.905073	1.06077	2.03572	0	1.20624	2.61579	0.901717
1.2758	0	0	1.34925	0.91828	0.973312	0	0	3.08355	1.04145	0.408764	0	0	0	0.934241	4.23301	1.1984	0.443068	2.3582	1.20845	1.45553	0	0.979214	1.14621	0	0	0.988938	0	0	2.69839	0	0	1.06103	1.92023	1.48078	0	0	2.37572	1.12502	4.36712	0.429465	1.57484	1.25628	1.18752	0.391166	2.87805	0	2.48535	3.19611	0.77502
1.17633	0	0	0.906153	0.481877	0.621549	0	0	1.70484	1.92689	0.315678	0	0	0	1.51791	1.59149	1.40448	0.613121	1.39055	0.558796	1.15164	0	0.38666	0.801801	0	0	0.710291	0	0	0.711744	0	0	1.80573	1.30238	1.35065	0	0	2.51163	0.933542	3.1758	0.304029	1.02615	1.30782	1.19358	1.14265	2.38608	0	1.39076	2.02926	0.277843
1.36113	0	0	0.592354	0.395869	0.773124	0	0	1.10023	0.788307	0.263098	0	0	0	0.244159	2.85007	0.256017	0.57473	1.99798	2.343	0.125391	0	1.30942	0.490437	0	0	0.949012	0	0	2.93027	0	0	1.16508	1.74824	0.826212	0	0	1.56504	0.379513	2.42361	0.226996	0.846902	0.866202	1.11406	1.26163	2.56619	0	2.42699	1.91336	0.898074
0.797625	0	0	0.481506	0.899156	0.395381	0	0	1.04579	1.44089	0.356143	0	0	0	0.811267	0.737806	0.460669	0.772015	0.665626	0.571351	0.493767	0	0.636842	0.96341	0	0	0.575812	0	0	0.698867	0	0	1.28256	1.13772	0.742279	0	0	1.16709	0.821426	0.935298	0.0115149	0.571965	1.45501	1.32687	0.752725	1.4958	0	0.516675	1.43848	0.326295
0.454469	0	0	0.980061	0.62138	0.344989	0	0	0.46489	0.339048	0.0856414	0	0	0	0.88674	1.25982	0.595071	0.781431	0.681928	0.67267	0.72395	0	1.07675	0.471465	0	0	0.569195	0	0	1.1726	0	0	0.499239	0.914308	0.601949	0	0	0.570721	1.02696	0.943084	0.721697	0.586954	0.677068	0.984518	0.607741	0.916184	0	0.557481	0.954033	0.429371
0.694166	0	0	0.998434	0.500074	0.802322	0	0	2.61758	1.1251	0.44698	0	0	0	1.22633	3.007	1.06594	0.925478	1.36485	0.0764571	1.72594	0	0.516167	1.20996	0	0	1.39001	0	0	1.30885	0	0	0.779759	1.27239	1.50967	0	0	1.56226	1.27787	3.26638	0.488865	1.1329	0.509469	0.826526	0.559945	1.96624	0	1.00347	2.18509	0.38238
0.64228	0	0	0.598795	0.200363	0.278657	0	0	0.573178	0.471815	0.620272	0	0	0	0.550238	0.97838	0.678897	0.565075	0.574189	0.749122	0.79976	0	1.15003	0.843532	0	0	0.649769	0	0	0.825954	0	0	0.350817	0.83365	0.665717	0	0	0.611114	0.564996	0.583982	0.308869	0.406889	1.07268	0.660293	0.788794	0.722317	0	0.537712	0.858883	0.541947
0.373011	0	0	0.495437	0.56893	0.423497	0	0	1.40824	0.743902	0.351745	0	0	0	0.627082	2.03277	0.437342	0.564647	0.998318	0.447498	0.871954	0	0.431368	0.550859	0	0	0.592634	0	0	1.41423	0	0	0.552345	1.24164	0.773116	0	0	0.708641	0.800527	1.86041	0.323684	1.17123	0.830548	0.737878	0.668009	1.19596	0	1.12933	1.48215	0.452303
1.35541	0	0	0.971823	1.06462	1.39752	0	0	0.951558	0.746672	0.461037	0	0	0	3.7372	8.66985	0.414872	1.64133	0.129252	0.187562	0.335674	0	1.92031	1.93225	0	0	2.02667	0	0	5.81806	0	0	1.03185	1.52877	1.57584	0	0	0.471332	0.884944	4.19573	0.526293	1.58309	1.19141	1.20349	1.65309	1.6852	0	0.795957	2.56411	0.925772
1.07027	0	0	1.33478	1.08377	0.864169	0	0	2.57771	0.569882	0.488321	0	0	0	1.61075	6.04483	0.518291	0.984765	1.32895	0.711704	1.43978	0	1.14104	1.74326	0	0	1.5932	0	0	3.83652	0	0	0.649449	1.77664	1.62657	0	0	1.29609	1.46493	4.23987	0.590087	1.89612	0.794889	1.07753	0.921731	2.45623	0	1.60797	2.6693	0.993215
1.3129	0	0	0.534348	0.650205	0.499711	0	0	1.26249	1.65599	0.321944	0	0	0	0.734076	1.83092	0.63547	0.255432	1.78634	1.30917	0.558416	0	0.908758	0.792294	0	0	0.681048	0	0	1.39192	0	0	1.67988	1.25046	1.14899	0	0	1.76063	0.517688	2.40287	0.258948	0.572401	1.32913	1.54204	1.37512	2.25559	0	1.6305	1.83464	0.295015
0.724934	0	0	0.715234	0.761878	0.639577	0	0	1.22692	0.610063	0.36443	0	0	0	1.20159	0.732688	0.526026	0.36913	0.476765	1.08437	0.337089	0	0.806604	0.57601	0	0	0.568756	0	0	1.07336	0	0	0.684595	1.70612	1.00278	0	0	0.578836	0.526629	0.764355	0.320361	1.00277	0.735654	1.44082	0.560995	1.0322	0	1.18219	1.40526	0.991238
1.07992	0	0	0.17283	0.838002	0.470798	0	0	1.02937	1.10522	0.20481	0	0	0	1.09498	0.961773	0.735075	0.663238	0.81822	0.391707	0.678506	0	0.764141	0.868351	0	0	0.647688	0	0	0.546326	0	0	1.48324	1.00941	0.690437	0	0	1.5718	0.694336	1.34399	0.078851	0.578203	1.41953	1.36365	0.477352	1.29973	0	0.401816	1.188	0.2398
0.712472	0	0	0.910167	0.580539	0.31253	0	0	0.95384	1.20965	0.293772	0	0	0	0.387575	1.34513	0.567699	0.18817	1.06599	1.33705	0.586012	0	0.571924	0.427758	0	0	0.70206	0	0	1.10641	0	0	1.19333	0.834343	0.637265	0	0	1.60311	0.535314	1.48544	0.399704	0.56912	1.50016	1.19809	0.717248	1.6545	0	1.10976	2.19808	0.275025
1.67795	0	0	1.22966	2.10775	1.06625	0	0	1.35848	0.83261	0.990464	0	0	0	2.08519	5.02298	1.24759	0.504835	2.2046	0.489797	0.559484	0	2.74955	2.87424	0	0	1.23571	0	0	4.57735	0	0	0.433775	2.44352	1.11094	0	0	1.21028	0.429044	3.50625	0.701386	1.61173	1.51957	2.71254	2.67465	2.10481	0	2.84129	3.88427	0.819439
0.374983	0	0	0.256656	0.235177	0.126675	0	0	0.299955	0.198863	0.253173	0	0	0	0.668799	0.977036	0.158205	0.401732	0.0774503	0.139337	0.245601	0	0.352002	0.200505	0	0	0.339854	0	0	1.0097	0	0	0.300348	0.418934	0.159031	0	0	0.100362	0.12298	0.548537	0.229001	0.419536	0.237748	0.0662595	0.371578	0.251217	0	0.161548	0.368877	0.282208
0.164878	0	0	0.115437	0.193375	0.146943	0	0.123584	0.176387	0.168716	0.108436	0	0	0	0.352679	0	0.0624691	0.156423	0.139039	0.117492	0.195048	0	0.0676356	0.0920176	0	0	0.160476	0	0	0.440934	0	0	0.151129	0.190055	0.142896	0	0	0.149107	0.167035	0.154915	0.0761888	0.19286	0.207583	0.169862	0.204283	0.141553	0	0.163916	0.221904	0.215841
0.160371	0	0	0.111127	0.0992989	0.0537573	0	0.185959	0.108394	0.0456198	0.125809	0	0	0	0.176875	0	0.104297	0.162173	0.0993449	0.163344	0.0685037	0	0.106702	0.122315	0	0	0.191856	0	0	0.294285	0	0	0.113208	0.116517	0.180661	0	0	0.175539	0.138235	0.154196	0.116565	0.187099	0.135554	0.184339	0.159052	0.140919	0	0.175455	0.179366	0.197205
0.285398	0	0	0.00182246	0.0114859	0.230671	0	0.568689	0.224647	0.18679	0.199743	0	0	0	0.147639	0	0.163816	0.194142	0.204246	0.253905	0.192047	0	0.157023	0.0925293	0	0	0.288908	0	0	0.216787	0	0	0.262229	0.163883	0.173542	0	0	0.224799	0.177996	0.197579	0.0791392	0.144408	0.041956	0.232697	0.260303	0.192517	0	0.375782	0.0941112	0.17782
0.410442	0	0	0.161321	0.219153	0.160898	0	0.0857586	0.289212	0.115382	0.268278	0	0	0	0.4153	0	0.345636	0.236084	0.201835	0.334655	0.254157	0	0.329876	0.27076	0	0	0.239114	0	0	0.255759	0	0	0.253269	0.342839	0.377961	0	0	0.312615	0.281062	0.128413	0.24192	0.242639	0.538657	0.366302	0.271625	0.303816	0	0.234848	0.300819	0.276749
0.32515	0	0	0.366568	0.200673	0.267441	0	0	0.241297	0.393845	0.392592	0	0	0	0.420223	0.358237	0.406687	0.517199	0.372351	0.0940838	0.220506	0	0.615234	0.491984	0	0	0.557431	0	0	0.464654	0	0	0.307941	0.4112	0.509773	0	0	0.390859	0.517095	0.386365	0.209673	0.207384	0.403265	0.464423	0.441131	0.457905	0	0.421882	0.430433	0.426613
0.367098	0	0	0.29864	0.402754	0.391722	0	0	0.536106	0.687931	0.399351	0	0	0	0.665455	0.199792	0.593715	0.392526	0.62916	0.370222	0.759419	0	0.284333	0.701536	0	0	0.501704	0	0	0.23874	0	0	0.649386	0.429317	0.348159	0	0	0.559868	0.676271	0.485812	0.145234	0.384204	0.552837	0.702432	0.626098	0.678129	0	0.531708	0.364478	0.270718
0.42108	0	0	0.47211	0.214026	0.402285	0	0	0.576494	0.518297	0.470888	0	0	0	0.83661	0.766166	0.761896	0.381604	0.37956	0.468933	0.843872	0	0.66723	0.72212	0	0	0.149034	0	0	0.702638	0	0	0.472187	0.936077	0.420388	0	0	0.449838	0.718351	0.600725	0.322788	0.224528	0.646976	0.900771	1.05077	0.648725	0	0.676806	0.758301	0.29282
2.16471	0	0	2.02527	1.45385	1.42034	0	0	0	0.474188	0.746453	0	0	0	5.3526	7.03917	1.18696	1.24121	0.325189	0.292286	0.993295	0	2.16648	2.41553	0	0	1.18831	0	0	5.90086	0	0	1.20217	1.99971	0.77273	0	0	1.89668	0.395863	3.84426	0.803997	2.00922	3.1088	1.87653	1.70398	1.26607	0	0.83925	3.15853	1.77654
0.49801	0	0	0.308718	0.546687	0.461696	0	0	0.432602	0.777151	0.165097	0	0	0	0.964865	0.554983	0.376274	0.555799	0.696105	1.18645	0.535806	0	0.424468	0.44194	0	0	0.781176	0	0	0.876784	0	0	0.610048	1.19143	0.7335	0	0	0.440958	0.584839	0.91465	0.456868	0.379989	0.592319	1.08453	0.421003	0.919635	0	0.930646	0.818106	0.371804
0.525752	0	0	0.606488	0.390676	0.275353	0	0	0.605102	0.963931	0.531736	0	0	0	0.382221	0.832847	0.667617	0.44188	0.776566	0.615422	0.402547	0	0.386151	0.353521	0	0	0.621153	0	0	0.494824	0	0	0.704274	0.444247	0.730763	0	0	1.07531	0.635272	1.08013	0.216969	0.381236	0.78705	0.780357	0.832627	1.21984	0	0.563724	1.33463	0.269025
0.789761	0	0	0.737561	0.854997	0.447082	0	0	1.13767	1.18426	0.304342	0	0	0	0.669721	1.03097	0.563504	0.314576	1.2844	1.91325	0.420143	0	0.648928	0.567592	0	0	0.804535	0	0	0.93735	0	0	1.3653	1.10028	0.709161	0	0	1.72316	0.494536	1.32707	0.358057	0.356101	1.31238	1.8331	0.594518	1.85708	0	1.3933	1.78549	0.462304
0.310263	0	0	0.479675	0.470233	0.426377	0	0	0.802296	0.862105	0.221071	0	0	0	1.14372	0.652453	0.552055	0.281988	0.793996	0.51353	0.735166	0	0.539403	0.767562	0	0	0.871795	0	0	0.599271	0	0	0.854395	0.825119	0.770756	0	0	0.940501	0.764241	0.952145	0.339325	0.567123	1.03476	1.18125	0.529316	0.853593	0	0.612179	0.948109	0.151809
0.723083	0	0	0.347094	0.730287	0.425389	0	0	0.898354	1.06611	0.253953	0	0	0	0.976898	0.74256	0.60447	0.827435	0.796614	0.635173	0.713623	0	0.608721	0.80503	0	0	0.907529	0	0	0.3461	0	0	1.2	1.5199	0.982011	0	0	1.07553	0.792661	1.21321	0.105133	1.12889	1.23632	1.73529	1.2611	1.73087	0	0.818274	1.05583	0.339596
0.878504	0	0	0.779128	1.03263	0.498431	0	0	1.11044	1.59148	0.359319	0	0	0	0.78832	1.10193	0.979223	0.40521	0.959014	0.860336	0.751392	0	0.473423	0.803861	0	0	0.842022	0	0	0.430066	0	0	1.48503	0.869441	1.18321	0	0	1.98641	1.0339	1.7296	0.324745	1.02552	1.68623	1.64082	1.38575	2.02249	0	0.874745	2.23225	0.153748
0.975893	0	0	0.682208	1.07253	0.77664	0	0	2.49227	1.32953	0.631221	0	0	0	1.87302	1.25538	1.21753	0.957674	0.713879	0.467323	1.14287	0	1.14808	1.11375	0	0	1.64115	0	0	0.64604	0	0	0.906426	1.15832	2.16933	0	0	1.75633	1.42875	1.4288	0.500882	1.02303	1.63708	2.29249	1.20755	2.33441	0	0.686059	1.19077	1.37205
0.490364	0	0	0.341075	1.16565	0.525556	0	0	0.654511	1.40642	0.284333	0	0	0	1.7648	1.30544	0.565567	0.698966	0.68636	1.55166	0.420225	0	0.990596	1.3137	0	0	1.27371	0	0	1.1813	0	0	1.82777	1.16158	1.1692	0	0	1.21136	0.786465	0.752257	0.260868	0.617045	1.28234	1.9477	1.28383	1.72416	0	0.653595	1.48766	0.988214
0.928574	0	0	0.20584	0.580298	0.662989	0	0	0.866443	1.26866	0.189761	0	0	0	1.10757	0.584267	0.596536	0.606122	0.81431	1.46859	0.570627	0	0.407857	0.759541	0	0	0.662336	0	0	0.706216	0	0	1.46137	1.12644	0.464626	0	0	1.57459	0.516869	1.11723	0.173793	0.56782	1.00816	1.48962	0.546331	1.32835	0	1.17502	0.824351	0.307551
0.289077	0	0	0.397835	0.656245	0.434641	0	0	0.864738	0.575794	0.359221	0	0	0	1.19391	0.571627	0.496983	0.409829	0.803484	0.504851	0.610938	0	0.796596	0.60597	0	0	0.816704	0	0	0.590795	0	0	0.966475	0.864398	1.21832	0	0	0.575953	0.652971	0.793115	0.202741	0.469661	0.599106	1.62255	0.461243	1.09034	0	0.997547	1.10756	0.370184
0.858726	0	0	0.536308	0.438343	0.632379	0	0	1.22537	0.906155	0.14606	0	0	0	0.667969	2.05914	0.288283	0.274541	1.6764	1.40712	0.435812	0	0.84905	0.579118	0	0	0.636574	0	0	1.82628	0	0	0.759652	1.36177	0.470655	0	0	1.32921	0.352752	2.09448	0.217624	0.405686	0.572909	1.33716	0.701117	1.8481	0	1.34192	1.76355	0.341459
0.344094	0	0	0.312732	0.162784	0.389723	0	0	0.688255	0.494053	0.126206	0	0	0	0.336558	0.0245526	0.300812	0.303908	0.396371	0.23467	0.368953	0	0.336586	0.485943	0	0	0.331961	0	0	0.106922	0	0	0.236191	0.45074	0.601928	0	0	0.40421	0.545116	0.460772	0.228994	0.396968	0.459399	0.409546	0.423985	0.588849	0	0.418712	0.293186	0.341763
0.780408	0	0	0.456864	0.441015	0.422183	0	0	1.67042	0.712339	0.205704	0	0	0	1.05803	1.65106	0.713946	0.591484	1.0998	1.31476	0.555386	0	0.723236	0.340631	0	0	1.02582	0	0	1.19926	0	0	0.823754	1.1411	0.663852	0	0	1.53893	0.734257	1.75206	0.389675	1.14066	0.766827	0.863381	0.609429	2.518	0	1.03436	1.53186	0.558071
0.46696	0	0	0.383477	0.422569	0.688638	0	0	0.656101	0.593766	0.453933	0	0	0	0.652878	2.30719	0.578532	0.764004	1.00305	0.626013	0.135863	0	0.926157	0.817174	0	0	1.04711	0	0	2.1096	0	0	0.58759	0.927051	0.610169	0	0	0.638454	0.311998	1.62287	0.165241	1.03063	0.86883	0.662723	0.786962	1.17398	0	0.950344	1.5754	0.437228
0.693811	0	0	0.99058	0.772862	0.778779	0	0	1.37569	0.752784	0.55813	0	0	0	0.94018	3.26484	0.72381	0.348506	1.07146	0.405177	0.669062	0	1.32068	0.8299	0	0	0.72269	0	0	2.41051	0	0	0.384412	1.40467	0.793784	0	0	1.03848	0.337921	2.64883	0.575594	1.15115	0.694366	0.993889	0.960408	1.48504	0	1.21791	2.34946	0.648279
1.35306	0	0	0.928895	0.660877	0.918886	0	0	1.41745	0.486099	0.33135	0	0	0	1.1794	4.205	0.513635	0.660499	1.45102	1.71609	0.485524	0	1.27405	1.07681	0	0	1.00513	0	0	3.35405	0	0	0.435661	1.86017	0.564113	0	0	1.70205	0.630664	3.1254	0.489355	1.32836	0.718023	1.25761	1.10139	2.82936	0	1.61217	2.15815	0.794903
0.523941	0	0	0.659502	0.607917	0.234387	0	0	0.781862	1.86506	0.284889	0	0	0	0.578933	0.744286	0.608264	0.46763	1.01178	0.460672	0.307504	0	0.718159	0.651286	0	0	0.392568	0	0	0.415756	0	0	1.28262	0.706143	0.919191	0	0	1.56609	0.652737	1.45884	0.347923	0.596312	1.4388	1.02622	1.09917	1.34908	0	0.644833	1.85499	0.344454
0.937351	0	0	0.161182	0.676433	0.59927	0	0	1.54769	0.597433	0.282981	0	0	0	1.3074	2.30163	0.795917	0.59659	1.2712	1.45432	1.16125	0	0.856316	1.22703	0	0	0.715471	0	0	2.01184	0	0	0.786357	2.28513	1.036	0	0	1.79874	0.72425	2.23485	0.178666	1.10018	1.45199	1.57917	0.972149	2.21072	0	1.21473	1.29372	0.335818
0.481459	0	0	0.800696	0.541169	0.531453	0	0	1.09972	1.44435	0.303822	0	0	0	0.826025	1.38578	0.974485	0.555881	1.08345	1.92303	0.91578	0	0.644124	0.467875	0	0	1.15356	0	0	0.945031	0	0	0.930254	0.899044	0.939908	0	0	1.9054	0.635485	1.93804	0.389131	0.469154	0.848885	1.3317	0.677066	2.12558	0	1.03061	2.38061	0.362536
0.646232	0	0	0.560893	0.643965	0.769513	0	0	1.04968	0.747823	0.28662	0	0	0	0.945325	1.63731	1.11888	0.112397	1.09135	0.718318	0.536249	0	0.734018	0.805824	0	0	1.16562	0	0	1.0763	0	0	0.836854	0.901498	0.954415	0	0	1.26419	0.60756	1.73717	0.436854	0.580218	0.929761	1.58182	0.733106	1.61447	0	0.804602	1.39166	0.292225
0.872727	0	0	0.231238	0.423196	0.583954	0	0	1.08413	0.574009	0.619718	0	0	0	1.36113	1.00883	0.986234	0.635049	0.714527	0.144667	0.69606	0	0.575083	0.86364	0	0	0.913961	0	0	0.850344	0	0	1.03628	0.917411	0.814797	0	0	0.80419	0.881312	1.46384	0.115346	0.573906	0.699386	1.09598	0.452473	1.28409	0	0.470957	0.717277	0.509076
0.524588	0	0	0.81745	0.482567	0.433961	0	0	1.05266	1.44356	0.237498	0	0	0	0.877063	1.73739	0.601181	0.207319	1.20273	0.181327	0.809604	0	0.483496	0.797273	0	0	0.692433	0	0	0.94957	0	0	0.556653	0.988924	0.849657	0	0	1.39292	0.660086	2.17634	0.428565	0.673142	0.732719	1.30431	0.699731	1.43454	0	0.554523	1.71696	0.283657
0.429619	0	0	0.895088	0.73234	0.863212	0	0	1.98771	1.19045	0.294062	0	0	0	1.13109	2.30686	0.964237	0.865314	0.91385	0	1.70821	0	0.459932	0.92493	0	0	1.04724	0	0	1.32875	0	0	0.700488	1.0337	1.28331	0	0.561874	1.09827	1.37873	2.30335	0.437907	1.50693	0.860288	0.653362	0.41073	1.45653	0	0.759223	1.50249	0.322134
0.803729	0	0	1.02337	1.1202	0.790243	0	0	2.04374	1.86964	0.577999	0	0	0	0.583698	2.66778	1.40829	1.29627	1.36177	0.733944	0.559228	0	0.49295	0.954647	0	0	2.24557	0	0	1.65357	0	0	1.59121	0.795685	1.32515	0	0	1.48228	1.56152	2.36834	0.654389	1.69565	1.37753	0.8899	1.16426	2.44207	0	1.10195	2.7183	1.20705
0.768883	0	0	0.929338	0.908521	0.757289	0	0	1.95626	1.54469	0.15225	0	0	0	1.32979	2.41996	1.02166	0.472292	1.20813	0.619657	0.946234	0	0.894177	1.27253	0	0	0.877595	0	0	1.34654	0	0	1.16174	1.49314	1.42514	0	0	1.18635	0.708249	2.62773	0.471251	0.685014	1.08855	1.72363	0.686331	1.89509	0	1.27118	1.40175	0.30669
0.472502	0	0	0.537997	0.466276	0.561639	0	0	1.15936	1.07779	0.48861	0	0	0	1.096	2.23448	0.620341	0.523011	1.08491	0.317957	0.707906	0	0.425135	0.720151	0	0	0.586819	0	0	1.57009	0	0	0.679852	1.3472	0.897775	0	0	1.26947	0.485831	2.42513	0.135778	0.971458	0.806353	0.819712	1.05332	1.67687	0	1.13458	1.39898	0.30672
0.645139	0	0	0.603842	0.701508	0.650733	0	0	1.63688	1.01496	0.286775	0	0	0	0.866902	2.28398	0.901109	0.500079	1.35603	0.524948	0.975493	0	0.740922	0.801606	0	0	0.66438	0	0	1.46144	0	0	0.949616	1.40515	0.983992	0	0	1.60662	0.662129	2.68203	0.355516	0.983417	1.11381	1.13154	0.569275	1.79175	0	1.35355	2.19329	0.272311
0.925942	0	0	0.360193	0.355944	0.578642	0	0	1.38749	0.973799	0.0734711	0	0	0	0.930368	1.04098	0.376399	0.174767	1.5801	1.27674	0.547074	0	0.717584	0.408901	0	0	0.415036	0	0	1.12373	0	0	1.68807	1.21728	0.731212	0	0	1.1076	0.620633	1.7044	0.146828	0.409434	0.672715	1.0672	0.665124	1.6123	0	1.52671	1.291	0.318584
1.25144	0	0	0.603867	0.400957	0.770423	0	0	2.42874	1.23278	0.213518	0	0	0	1.05578	2.73044	0.970595	0.66538	1.8782	1.63089	1.11036	0	0.761933	0.750788	0	0	1.05341	0	0	1.81817	0	0	1.67652	1.39669	1.26851	0	0	1.91354	1.20062	3.48275	0.419151	1.24652	0.451921	0.911764	0.823217	3.12053	0	2.15835	1.86838	0.707636
0.710583	0	0	0.548001	0.464314	0.615297	0	0	1.68057	1.35316	0.147501	0	0	0	0.98416	1.29436	0.836381	0.759848	1.33248	0.945329	0.831912	0	0.341167	0.725207	0	0	0.723199	0	0	0.608685	0	0	1.27451	1.21248	0.959172	0	0	2.02974	0.812949	2.28167	0.207506	0.671667	1.04028	1.35651	0.51237	2.11637	0	1.32103	1.41992	0.321875
0.452049	0	0	0.966897	0.294838	0.270056	0	0	0.901122	0.792644	0.575345	0	0	0	1.13869	0.905379	0.558214	0.568724	0.665798	0.274509	1.01571	0	0.90199	0.806306	0	0	0.915868	0	0	0.807235	0	0	0.861302	0.527371	0.752763	0	0	0.576919	0.975201	0.923487	0.44022	1.12063	0.797984	0.978131	0.580681	0.990521	0	0.607062	0.752295	0.485427
0.916321	0	0	0.946679	0.587706	0.791856	0	0	2.41614	1.05142	0.3403	0	0	0	0.82436	3.15551	0.970811	0.776065	1.34333	0.560993	1.27533	0	0.603882	1.064	0	0	1.12439	0	0	1.56403	0	0	0.684796	1.0262	1.52449	0	0	1.424	1.13546	3.14194	0.539639	0.877254	0.634171	0.992934	0.452834	1.91989	0	1.02965	2.74657	0.563927
0.389799	0	0	0.577438	0.540274	0.258972	0	0	0.651851	0.71703	0.607983	0	0	0	0.602116	0.684917	0.441153	0.566801	0.521121	0.388843	0.372689	0	0.555613	0.719608	0	0	0.445066	0	0	0.510375	0	0	0.352786	0.625569	0.526834	0	0	0.555058	0.839143	0.862581	0.314541	0.655632	0.785527	0.669671	0.729402	0.582599	0	0.690052	0.736868	0.55038
0.631106	0	0	0.745429	0.508284	0.372615	0	0	1.247	1.06634	0.152722	0	0	0	0.369756	2.03624	0.736919	0.460534	1.08103	0.722125	0.847051	0	0.583263	0.583765	0	0	0.696999	0	0	1.38584	0	0	0.735986	0.848442	0.892705	0	0	1.13415	0.76094	2.19599	0.463534	0.700338	0.846885	0.821733	0.542846	1.50412	0	1.07159	2.22593	0.369385
1.48853	0	0	0.985471	1.2299	1.27773	0	0	1.2276	0.746938	0.424388	0	0	0	1.76748	5.89713	0.126069	0.687321	1.47849	1.09017	0.25572	0	1.82862	1.77755	0	0	1.44879	0	0	4.46736	0	0	0.401984	1.57262	0.95089	0	0	1.01084	0.549684	3.13092	0.5911	0.896141	0.927614	1.60388	1.55009	1.79291	0	1.37736	2.42047	1.0419
1.19316	0	0	0.523683	0.821311	0.7732	0	0	1.8642	0.62208	0.63317	0	0	0	1.69775	3.34963	0.450471	1.09534	1.0642	0.0519681	1.13043	0	0.996936	1.20962	0	0	1.5669	0	0	2.44384	0	0	0.723998	1.61544	1.39155	0	0	1.02498	1.3236	2.46894	0.581594	1.61491	0.7278	0.503336	1.51607	1.72341	0	1.41637	1.6248	0.971476
0.920183	0	0	0.291824	0.467003	0.584129	0	0	0.720167	0.635211	0.340292	0	0	0	0.568446	1.96986	0.327156	0.102656	1.10571	1.09431	0.478714	0	0.981996	0.421737	0	0	0.622885	0	0	1.99703	0	0	0.955537	1.31546	0.563955	0	0	0.849512	0.176763	1.82237	0.349307	0.518889	0.674564	1.08701	1.39311	1.39666	0	1.43913	1.64794	0.335023
0.776428	0	0	0.443199	0.753287	0.612881	0	0	1.16462	0.971205	0.296977	0	0	0	1.37582	1.37981	0.903884	0.819128	0.969402	2.15406	0.517838	0	0.895753	0.446932	0	0	1.43326	0	0	1.08876	0	0	1.12702	1.14449	1.11192	0	0	1.75084	0.84767	1.24081	0.224115	1.02558	1.48568	1.62772	0.793191	2.27331	0	1.06288	1.83958	0.559631
0.914751	0	0	0.289242	0.889563	0.260649	0	0	1.19117	1.25721	0.285769	0	0	0	1.15383	0.76003	0.789463	0.567277	0.488054	0.941223	0.652005	0	0.655201	1.29323	0	0	1.15427	0	0	0.648317	0	0	1.42829	0.641731	0.616214	0	0	1.44551	1.1292	1.10415	0.255999	0.679425	1.17098	1.73471	0.648142	1.68052	0	0.378415	1.28782	0.566323
0.919697	0	0	1.0331	0.718047	0.544251	0	0	1.91635	1.27413	0.234372	0	0	0	1.2811	1.16961	1.34406	0.462285	1.01586	0.363882	1.03615	0	0.418221	0.771717	0	0	0.789117	0	0	0.299332	0	0	0.999983	1.04928	0.890138	0	0	2.45517	0.87937	2.52238	0.216114	1.02771	0.90057	1.42764	0.503947	2.4394	0	0.982174	1.14247	0.369114
0.753651	0	0	0.513497	0.735253	0.511426	0	0	0.70818	0.710785	0.415774	0	0	0	0.802263	0.682727	0.700953	0.363549	0.585274	0.58868	0.370225	0	0.635732	0.56605	0	0	1.35173	0	0	0.802471	0	0	0.74984	0.873944	0.497493	0	0	1.0264	0.525558	0.865622	0.650631	0.834402	1.19047	1.08416	0.842639	1.2298	0	0.917819	1.00367	0.448636
0.341235	0	0	0.290467	0.213802	0.0726606	0	0	0.24659	0.14365	0.282485	0	0	0	0.630835	1.0203	0.176929	0.359219	0.0672519	0.215866	0.209157	0	0.368803	0.221784	0	0	0.349517	0	0	1.01652	0	0	0.279733	0.374654	0.132567	0	0	0.103252	0.156796	0.558506	0.234138	0.39449	0.232995	0.134617	0.259709	0.207896	0	0.11886	0.355872	0.286484
0.174614	0	0	0.165	0.162224	0.0563893	0	0.0128361	0.167841	0.149543	0.214942	0	0	0	0.307344	0	0.0845441	0.13235	0.105717	0.122037	0.200578	0	0.0477028	0.155615	0	0	0.15479	0	0	0.420051	0	0	0.178009	0.219944	0.139303	0	0	0.123822	0.224904	0.197048	0.0644416	0.174797	0.23543	0.201122	0.210342	0.14293	0	0.154754	0.256034	0.189637
0.147557	0	0	0.126732	0.127825	0.0561832	0	0.0156717	0.184485	0.0930663	0.0836768	0	0	0	0.215006	0	0.12379	0.231699	0.0421513	0.210259	0.0490773	0	0.239928	0.176175	0	0	0.212699	0	0	0.323735	0	0	0.0810112	0.183411	0.240751	0	0	0.175222	0.0859588	0.21248	0.17938	0.237809	0.209022	0.121377	0.137119	0.114094	0	0.116014	0.218156	0.151119
0.192166	0	0	0.014733	0.0757712	0.207578	0	0.425064	0.234217	0.117835	0.220484	0	0	0	0.206294	0	0.101748	0.173581	0.218862	0.202974	0.226542	0	0.105639	0.0708747	0	0	0.216637	0	0	0.3054	0	0	0.250039	0.187117	0.149683	0	0	0.17203	0.145244	0.128422	0.0348946	0.193031	0.0934847	0.203376	0.207231	0.150087	0	0.243651	0.101862	0.15388
0.490046	0	0	0.47876	0.155847	0.270013	0	0.000714703	0.467723	0.404199	0.511628	0	0	0	0.524776	0.00955599	0.308511	0.296503	0.189409	0.531568	0.107192	0	0.579273	0.805542	0	0	0.615825	0	0	0.342951	0	0	0.437161	0.547668	0.317131	0	0	0.306921	0.336608	0.32146	0.278296	0.303622	0.488529	0.705429	0.479381	0.498409	0	0.462919	0.406617	0.532016
0.464486	0	0	0.165361	0.251894	0.635137	0	0	0.339507	0.436183	0.255517	0	0	0	0.662497	0.261109	0.284134	0.811401	0.564359	0.672902	0.625584	0	0.464249	0.488973	0	0	0.356217	0	0	0.323447	0	0	0.537383	0.503117	0.61045	0	0	0.590994	0.888477	0.44557	0.177835	0.413214	0.841459	0.836439	0.538813	0.73408	0	0.562651	0.487277	0.153162
0.696411	0	0	0.710245	0.631757	0.744675	0	0	0.58598	1.56654	0.430914	0	0	0	0.903348	0.382014	0.567086	0.510678	0.561422	0.920259	0.528155	0	0.613735	0.424985	0	0	0.976512	0	0	0.400061	0	0	0.738289	0.867459	0.806082	0	0	1.16773	0.704936	0.827361	0.379658	0.695784	1.26927	1.50952	1.02732	1.21029	0	0.868336	1.29084	0.315817
0.350354	0	0	0.358997	0.502236	0.294236	0	0	0.176506	1.05489	0.245317	0	0	0	0.400493	0.298695	0.473569	0.260602	0.569685	0.763986	0.439882	0	0.476689	0.49436	0	0	0.480071	0	0	0.401842	0	0	0.553733	0.598479	0.970068	0	0	0.870678	0.515116	0.793389	0.213901	0.357145	1.11699	1.03772	0.987542	0.950625	0	0.727327	1.23009	0.375661
1.8377	0	0	1.34163	1.86245	1.28625	0	0	0	1.04979	0.521653	0	0	0	2.6172	5.08899	0.342634	0.64852	1.5491	0.431988	0.518785	0	3.18195	2.51287	0	0	0.406114	0	0	5.54432	0	0	0.434067	2.27168	0.705598	0	0	0.383966	0.205242	2.70403	0.776507	0.684013	1.6685	3.0374	2.4371	0.984792	0	2.12896	4.42768	0.959279
0.443142	0	0	0.551828	0.482604	0.500734	0	0	0.82316	1.09357	0.244039	0	0	0	0.788492	0.324933	0.619069	0.74069	0.613995	0.882215	0.42605	0	0.53367	0.413019	0	0	0.598886	0	0	0.335328	0	0	0.835436	0.985602	0.598924	0	0	0.983075	0.598057	0.79721	0.308848	0.724605	0.909382	1.38942	0.790921	1.47633	0	0.726646	1.01353	0.294977
0.176803	0	0	0.415213	0.440089	0.432581	0	0	0.533223	0.903034	0.0856545	0	0	0	0.548679	0.498896	0.474968	0.302494	0.507291	0	0.609545	0	0.495696	0.395129	0	0	0.583315	0	0	0.249178	0	0	0.513142	0.311698	0.666759	0	0.122304	0.678019	0.517733	0.823452	0.268397	0.345385	0.701073	0.862555	0.616036	0.704664	0	0.39723	0.789536	0.455765
0.733048	0	0	0.391332	0.636871	0.633902	0	0	0.541549	0.985648	0.313006	0	0	0	0.793825	0.411783	0.493456	0.660779	0.569351	0.743535	0.465575	0	0.736245	0.70105	0	0	0.764758	0	0	0.32861	0	0	0.788326	1.0636	1.09836	0	0	0.960034	0.445844	0.681936	0.255845	0.579971	1.14004	1.48445	1.05061	1.60834	0	0.224247	1.10989	0.51313
0.165245	0	0	0.641896	0.350639	0.419421	0	0	0.537123	0.46679	0.26041	0	0	0	0.750328	0.535105	0.645708	0.282927	0.748053	0.981089	0.526772	0	0.587206	0.239185	0	0	0.891751	0	0	0.643399	0	0	0.485858	0.81364	0.916158	0	0	0.634848	0.443337	0.57026	0.230954	0.51557	0.522694	1.18977	0.393344	0.738284	0	0.837237	0.776197	0.330544
0.790201	0	0	0.253575	0.299308	0.596101	0	0	0.806735	0.551466	0.322065	0	0	0	1.08874	0.623957	0.538497	1.29603	1.1916	0.753751	0.529547	0	0.817437	0.054868	0	0	1.03315	0	0	0.44265	0	0	0.743111	0.997181	1.43381	0	0	0.845687	0.755092	0.960876	0.220798	0.843423	1.10236	1.25705	0.785652	1.78622	0	0.721006	1.24015	0.886119
0.222117	0	0	0.550404	0.262863	0.345745	0	0	0.494421	0.689928	0.296033	0	0	0	0.763879	0.445097	0.575747	0.46659	0.73973	0.453915	0.516072	0	0.361763	0.0546217	0	0	0.599068	0	0	0.807933	0	0	0.391391	1.02444	0.871226	0	0	0.318105	0.263886	0.622644	0.253746	0.57231	0.774197	1.55128	0.691061	0.76721	0	0.964992	0.669005	0.538188
0.498151	0	0	0.423809	0.712517	0.110693	0	0	0.979567	0.886076	0.330622	0	0	0	1.04028	0.493157	0.441546	0.67695	0.493837	0.257466	0.73554	0	0.449275	0.664658	0	0	0.655757	0	0	0.67471	0	0	0.41548	1.03263	1.19909	0	0	0.249133	0.234756	0.650354	0.26278	0.610329	0.602021	1.08566	0.262689	0.796576	0	0.70518	0.876558	0.687121
1.00982	0	0	0.750107	0.684182	1.10369	0	0	0.882232	0.511685	0.495864	0	0	0	1.4869	0.999942	0.803902	0.836553	0.757619	0.755403	0.175221	0	0.883441	0.36202	0	0	1.21906	0	0	0.983391	0	0	0.581571	1.89561	1.34633	0	0	0.498266	0.59145	0.391822	0.291579	1.04265	0.630027	1.25033	0.627764	1.26367	0	1.0144	1.18441	1.03357
1.3307	0	0	0.808311	1.11297	1.00468	0	0	0.936027	2.77265	0.51441	0	0	0	2.32049	1.75231	1.46725	1.25417	0.273912	0.362555	1.17553	0	0.559097	1.47679	0	0	1.4607	0	0	0.728885	0	0	1.68861	1.14917	1.06787	0	0	2.67995	0.87034	2.41306	0.642713	1.01203	1.65937	1.94522	1.6246	1.5991	0	1.07663	1.76323	0.647602
0.522905	0	0	0.994881	1.10069	0.534567	0	0	1.11875	1.24103	0.200933	0	0	0	1.72332	1.42846	0.517134	0.390111	1.16961	1.04194	0.284963	0	1.61936	0.895519	0	0	0.777624	0	0	1.54324	0	0	0.494767	2.32098	1.60755	0	0	0.118348	0.442942	1.04941	0.449895	0.719694	1.06654	2.35245	1.13349	1.72239	0	1.6998	1.12489	1.08195
0.833142	0	0	0.412399	1.22822	0.725655	0	0	0.900169	2.40196	0.431488	0	0	0	1.13023	0.849733	0.558132	1.13201	0.982419	1.01992	0.454954	0	0.842643	1.37451	0	0	0.993701	0	0	0.791544	0	0	1.46333	0.891097	1.27439	0	0	1.49045	1.39211	1.06505	0.139094	0.761049	1.12356	1.75674	1.14882	1.56913	0	0.411131	1.74351	0.828889
0.154598	0	0	0.346309	0.134156	0.372639	0	0	0.425559	0.528158	0.271787	0	0	0	0.496812	0.0922868	0.334175	0.232973	0.226704	0.154598	0.568224	0	0.302287	0.389405	0	0	0.33776	0	0	0.328472	0	0	0.353236	0.306708	0.299121	0	0	0.559697	0.363822	0.480983	0.273906	0.401721	0.489748	0.488658	0.320423	0.424952	0	0.29058	0.490657	0.186515
0.850789	0	0	0.763819	0.478935	0.448235	0	0	0.901377	2.14283	0.264582	0	0	0	1.5771	1.25488	1.02036	0.732571	1.02456	1.23309	0.662585	0	0.570559	0.629049	0	0	0.674569	0	0	0.735618	0	0	1.30656	1.31877	0.81514	0	0	1.9884	0.68072	2.08763	0.305126	0.811374	1.16885	1.37973	0.899899	2.00192	0	1.0474	1.97107	0.210246
0.861362	0	0	0.813307	0.848117	0.651754	0	0	1.45109	0.502201	0.401651	0	0	0	1.29779	3.85428	0.534766	0.444173	0.863156	0.0213718	0.885435	0	0.787131	1.1956	0	0	1.1358	0	0	2.42658	0	0	0.372947	1.44678	0.935751	0	0	1.06646	1.00093	2.77819	0.662028	1.44714	0.838239	1.0068	1.03996	1.47024	0	0.927124	1.92802	0.612456
1.3402	0	0	1.12421	1.17565	1.14309	0	0	1.85245	0.598117	0.408874	0	0	0	1.90107	5.99379	0.424839	1.38223	1.07253	0.267311	0.707623	0	1.34713	1.29954	0	0	1.79968	0	0	3.74678	0	0	0.782386	1.72138	1.38266	0	0	1.11138	1.23337	3.77544	0.595288	1.56774	0.962549	0.822666	1.32662	2.07928	0	1.43828	2.44676	1.07291
0.768904	0	0	0.73109	0.761058	0.48854	0	0	0.874201	0.412629	0.528333	0	0	0	1.14158	2.74504	0.266217	0.171075	1.02984	1.13662	0.561016	0	0.922683	0.79651	0	0	0.607859	0	0	2.23903	0	0	0.622772	1.01377	0.568785	0	0	0.670869	0.54487	1.69333	0.196523	0.660248	0.44695	1.24345	0.496227	1.20703	0	1.11781	1.61511	0.506399
0.920685	0	0	0.762991	0.753309	0.619466	0	0	1.36468	1.14226	0.203831	0	0	0	0.629528	1.89301	1.08014	0.660121	1.24574	1.20366	0.64828	0	0.718215	0.650556	0	0	1.01898	0	0	1.02017	0	0	1.32226	0.970949	1.02249	0	0	2.09028	0.67371	2.14848	0.392812	0.783417	1.64159	1.19932	1.03288	2.07453	0	0.780078	2.6721	0.413504
1.12671	0	0	0.437023	0.702957	0.348379	0	0	1.40994	0.906458	0.234361	0	0	0	1.10362	1.40983	0.894074	0.234658	1.10892	0.809807	0.669053	0	0.643677	0.777285	0	0	0.813632	0	0	1.00929	0	0	1.48523	1.15403	0.654229	0	0	1.79652	0.610469	1.66531	0.207527	0.573458	1.4267	1.74418	0.664137	1.97803	0	0.980825	1.69921	0.478931
0.413342	0	0	1.58823	1.05128	0.994346	0	0	1.78593	1.75593	0.710348	0	0	0	2.23616	1.15895	1.22211	0.326671	1.09593	0.810607	0.851082	0	0.756799	0.776878	0	0	1.22541	0	0	0.838974	0	0	0.929648	1.61342	1.41238	0	0	1.98829	1.24967	1.88831	0.711134	1.30378	1.21395	3.02886	1.05261	2.04179	0	1.07599	1.87387	0.829018
0.485938	0	0	0.418866	0.374359	0.497874	0	0	0.62062	0.657625	0.0439001	0	0	0	0.87596	0.578575	0.331422	0.390343	0.624457	0.696782	0.304988	0	0.660968	0.347403	0	0	0.746165	0	0	0.510378	0	0	0.692131	0.68854	0.679189	0	0	0.506693	0.576836	0.764842	0.337088	0.30104	0.568586	1.1483	0.692559	0.965043	0	0.991636	0.67698	0.399428
0.16018	0	0	0.202115	0.108549	0.144115	0	1.30749	0.268895	0.115078	0.325115	0	0	0	0.0972969	0	0.0623544	0.0338184	0.130346	0.0650404	0.211257	0	0.108636	0.270647	0	0	0.155117	0	0	0.104659	0	0	0.106516	0.112138	0.161352	0.0850955	0	0.106974	0.3072	0.0447412	0.199168	0.196615	0.0998304	0.055706	0.139222	0.09763	0	0.167317	0.233378	0.255625
0.402002	0	0	0.512403	0.463184	0.373088	0	0	0.656286	1.05802	0.240014	0	0	0	0.78784	0.513758	0.907111	0.539701	0.958537	0.271278	0.227833	0	0.373302	0.58365	0	0	0.588726	0	0	0.359022	0	0	0.758346	0.678556	0.878657	0	0	1.55206	0.574091	1.18693	0.271598	0.444594	0.95764	1.16977	0.731887	1.44511	0	0.52416	1.03702	0.535613
0.467062	0	0	0.766916	0.669356	0.696101	0	0	1.6118	1.01024	0.408924	0	0	0	1.22645	2.27165	1.24247	0.584062	1.1489	0.0765377	1.30949	0	0.863038	0.902744	0	0	0.866075	0	0	1.66953	0	0	0.695762	1.2711	1.06583	0	0	1.39123	0.724116	2.52176	0.501278	0.83632	0.950817	1.33198	0.783028	1.46248	0	1.00048	1.58166	0.381402
0.513694	0	0	0.361548	0.344498	0.602335	0	0	0.81258	0.535107	0.196769	0	0	0	0.598034	0.51856	0.612776	0.270444	0.394897	0.287556	0.502651	0	0.493626	0.718473	0	0	0.529013	0	0	0.317157	0	0	0.492793	0.498922	0.545492	0	0	0.560342	0.620147	0.801071	0.231053	0.296881	0.656239	0.683107	0.498092	0.85174	0	0.333195	0.577652	0.319245
0.676182	0	0	0.368415	0.660258	0.355233	0	0	0.943703	0.467149	0.25953	0	0	0	0.813432	1.0691	1.11305	0.462604	0.80307	0.82479	0.631704	0	0.771053	0.896286	0	0	0.645302	0	0	0.814137	0	0	0.575968	1.18909	1.06425	0	0	0.823396	0.696445	1.14781	0.292227	0.806613	1.01215	1.50909	0.481593	1.23813	0	0.564815	1.33246	0.574276
0.795176	0	0	0.754757	0.624748	0.263552	0	0	1.3545	1.14315	0.343664	0	0	0	0.902566	1.97064	0.619095	0.465109	1.45883	1.95632	0.365524	0	0.95882	0.686445	0	0	0.472208	0	0	2.00618	0	0	0.908436	1.58956	0.317551	0	0	1.82011	0.576917	2.16501	0.220133	0.971049	1.06776	1.25927	0.519928	2.50805	0	1.87612	1.31454	0.598509
0.811659	0	0	0.653591	0.627269	0.495774	0	0	1.16078	0.747383	0.272406	0	0	0	0.297872	2.3226	0.190231	0.203351	1.93133	2.31275	0.41907	0	1.18416	0.646204	0	0	0.413973	0	0	2.44065	0	0	1.02963	1.66001	0.481353	0	0	1.4195	0.37006	1.92769	0.211992	0.546108	1.3298	1.46935	0.585867	1.72757	0	1.8594	2.74909	0.455442
0.925529	0	0	0.277373	0.316827	0.447022	0	0	1.56205	0.721037	0.208711	0	0	0	0.930268	1.42888	0.778562	0.389405	1.18046	0.966161	0.625372	0	0.518594	0.643745	0	0	0.577043	0	0	1.2534	0	0	0.906692	1.2948	0.731526	0	0	1.40694	0.739946	2.0856	0.206428	1.04022	0.75133	0.897338	0.642146	2.09609	0	1.40026	0.742396	0.278822
1.69234	0	0	0.783412	0.538527	0.804333	0	0	3.40027	1.7932	0.265446	0	0	0	1.28309	3.44977	1.59332	1.25436	2.40058	1.73124	1.62141	0	0.699446	1.04673	0	0	1.13372	0	0	1.70476	0	0	2.26217	1.2476	2.3407	0	0	2.36934	1.83583	4.43045	0.532188	1.38153	0.415909	0.659359	0.923627	3.61097	0	2.55901	3.11883	1.0894
0.424373	0	0	1.02551	0.593098	0.693711	0	0	1.84104	1.53957	0.253061	0	0	0	0.832111	1.72333	0.60357	0.921591	1.47829	1.48166	0.972916	0	0.613021	0.579519	0	0	1.24902	0	0	0.695799	0	0	1.22001	0.972401	1.083	0	0	1.97507	0.874793	2.43369	0.397182	0.762311	0.514761	0.72283	0.646999	2.35947	0	1.41312	2.24485	0.791424
0.367781	0	0	0.42103	0.472275	0.521332	0	0	0.363798	0.440067	0.338602	0	0	0	0.666006	0.355209	0.47626	0.268289	0.468326	0.664851	0.560334	0	0.413873	0.382903	0	0	0.549807	0	0	0.641847	0	0	0.495252	0.517875	0.75313	0	0	0.50487	0.521279	0.651478	0.218205	0.578211	0.820354	1.03443	0.586211	0.787002	0	0.557535	0.661494	0.193273
0.750654	0	0	0.433889	0.506648	0.664217	0	0	1.17612	1.02893	0.222552	0	0	0	0.737481	1.25543	0.812955	0.409468	1.28243	1.03259	0.852784	0	0.51228	0.505067	0	0	0.677191	0	0	0.963961	0	0	1.16011	0.885466	0.758916	0	0	1.54449	0.431896	1.91698	0.224472	0.480564	0.771476	1.395	0.754882	1.34348	0	1.19069	1.83975	0.235886
0.377438	0	0	0.198695	0.293704	0.415614	0	0	0.484601	0.316076	0.349655	0	0	0	0.720529	0.0513063	0.227304	0.347701	0.382475	0.240525	0.447671	0	0.358573	0.330549	0	0	0.364632	0	0	0.472595	0	0	0.258603	0.482885	0.397519	0	0	0.359999	0.595367	0.273879	0.289964	0.341862	0.471617	0.420078	0.61189	0.416663	0	0.335815	0.342425	0.365113
1.14703	0	0	0.260531	0.49714	0.376019	0	0	1.10255	0.71323	0.244927	0	0	0	0.63053	1.06324	0.621437	0.296845	1.39747	1.64891	0.510712	0	0.671323	0.504605	0	0	0.381188	0	0	1.11144	0	0	1.16436	1.19168	0.572479	0	0	1.35906	0.400558	1.5215	0.100254	0.544919	1.03406	1.39334	0.652226	1.5752	0	1.31913	1.75496	0.16347
0.804261	0	0	0.737068	0.790417	0.822915	0	0	1.48178	0.547096	0.498931	0	0	0	0.766012	2.74859	0.208666	0.735894	1.09122	0.665897	0.61135	0	1.02923	0.717369	0	0	1.16262	0	0	2.0071	0	0	0.535448	0.930292	0.68761	0	0	0.859077	0.699907	1.86087	0.4021	0.692261	0.492439	0.998278	0.770426	1.50202	0	0.773163	1.80279	0.768327
1.0819	0	0	0.867922	1.13756	0.690258	0	0	1.67111	0.605223	0.489874	0	0	0	1.66505	5.05438	0.370343	0.751759	1.37421	1.05106	0.763982	0	1.28326	1.38846	0	0	1.14348	0	0	3.66175	0	0	0.764409	1.82712	1.00034	0	0	1.14379	0.953995	3.26231	0.659313	1.65717	0.947814	1.09484	1.12302	1.92553	0	1.89606	2.15551	0.75848
0.722482	0	0	0.728444	0.710011	0.808953	0	0	1.96421	0.415862	0.4229	0	0	0	1.13774	3.30407	0.930425	1.0248	0.649805	0.527467	1.12244	0	0.628432	0.965886	0	0	1.43091	0	0	1.87225	0	0	0.404233	1.15364	1.15009	0	0	1.31288	0.911723	2.43607	0.335791	1.18318	0.830297	0.557364	0.522331	1.77853	0	0.800964	1.2378	0.739652
1.36026	0	0	0.422243	1.23331	1.04346	0	0	2.39441	2.62738	0.271703	0	0	0	1.98229	3.55497	0.932505	1.69151	1.96129	2.04401	0.774454	0	1.3287	1.42618	0	0	2.30093	0	0	2.62824	0	0	2.00921	1.35291	1.93944	0	0	1.88228	1.48982	2.51786	0.50419	1.53384	1.84883	1.70777	1.79537	3.02466	0	1.87115	2.19196	1.3251
0.645258	0	0	0.174794	0.732355	0.534951	0	0	0.816592	1.47118	0.0479157	0	0	0	1.12678	1.06684	0.479325	0.439644	1.21999	1.68628	0.461332	0	0.861853	0.869142	0	0	0.701623	0	0	1.13437	0	0	1.4975	1.26612	0.57995	0	0	1.1116	0.619569	0.978303	0.0744934	0.326359	1.21518	2.11879	0.820321	1.41178	0	1.20245	1.57333	0.496072
0.481924	0	0	1.12305	0.878804	0.715896	0	0	1.3005	2.23286	0.329972	0	0	0	1.74597	1.22119	1.27302	0.471418	1.4595	0.46568	0.69324	0	0.558994	0.860878	0	0	0.51321	0	0	0.478825	0	0	1.23742	1.09579	1.23338	0	0	2.40549	1.12513	2.51925	0.365538	1.025	1.12592	1.75997	1.31943	2.4003	0	0.829733	1.94232	0.585335
0.324434	0	0	0.337833	0.292404	0.440422	0	0	0.641986	0.413087	0.418582	0	0	0	0.736851	0.371704	0.389472	0.424071	1.04035	1.07079	0.654658	0	0.781226	0.429876	0	0	0.411561	0	0	0.838861	0	0	0.560917	1.46752	0.610855	0	0	0.548255	0.365692	0.51781	0.250221	0.24016	0.678274	1.08093	0.541856	0.793499	0	0.664951	0.696738	0.271358
0.334971	0	0	0.273891	0.199539	0.110073	0	0	0.24015	0.1411	0.303544	0	0	0	0.621517	0.952492	0.154866	0.335183	0.0455785	0.201715	0.198095	0	0.394819	0.244022	0	0	0.334746	0	0	1.01401	0	0	0.293474	0.361878	0.112148	0	0	0.106438	0.126942	0.52415	0.19298	0.407442	0.242037	0.14426	0.263101	0.194352	0	0.109599	0.334037	0.285701
0.145479	0	0	0.118457	0.133533	0.10404	0	0.10244	0.129637	0.180065	0.1313	0	0	0	0.328651	0	0.130153	0.0928492	0.113127	0.0661993	0.186124	0	0.159814	0.20329	0	0	0.16024	0	0	0.39466	0	0	0.141896	0.190129	0.144714	0	0	0.113785	0.140078	0.217723	0.0929216	0.080144	0.181566	0.231183	0.176724	0.155133	0	0.115344	0.220758	0.203829
0.132662	0	0	0.0125313	0.103151	0.0730708	0	0.0176735	0.0846214	0.100626	0.116396	0	0	0	0.283167	0	0.0686538	0.254022	0.159703	0.166108	0.162623	0	0.132208	0.0718499	0	0	0.211276	0	0	0.361124	0	0	0.139303	0.159989	0.17942	0	0	0.171294	0.142766	0.190049	0.123274	0.237468	0.177523	0.160043	0.205103	0.128084	0	0.163592	0.222444	0.133424
0.214798	0	0	0.134121	0.101989	0.182364	0	0.333808	0.0577134	0.0513287	0.172676	0	0	0	0.312397	0	0.100742	0.165575	0.142941	0.14667	0.159968	0	0.179275	0.128153	0	0	0.197003	0	0	0.323706	0	0	0.217412	0.13618	0.0206268	0	0	0.16353	0.120583	0.0968482	0.0691537	0.208653	0.130297	0.229769	0.174409	0.106338	0	0.204783	0.0578683	0.197005
0.445847	0	0	0.348596	0.194861	0.308999	0	0	0.337462	0.350185	0.248785	0	0	0	0.569223	0.175545	0.404765	0.407869	0.202958	0.0655839	0.289944	0	0.535989	0.419887	0	0	0.437915	0	0	0.379612	0	0	0.232894	0.37331	0.333702	0	0	0.25728	0.169489	0.206766	0.147906	0.540949	0.359613	0.264626	0.346082	0.288374	0	0.311905	0.337956	0.3091
0.301467	0	0	0.241774	0.228331	0.342268	0	0	0.238958	0.416157	0.301333	0	0	0	0.499422	0.0365615	0.299125	0.367172	0.324713	0.327951	0.232421	0	0.519608	0.425378	0	0	0.433398	0	0	0.387221	0	0	0.147812	0.490171	0.4003	0	0	0.174642	0.228584	0.143864	0.187073	0.293807	0.57236	0.468742	0.510844	0.287789	0	0.57067	0.430205	0.188063
0.504597	0	0	0.44918	0.361841	0.7345	0	0	0.548384	0.887035	0.154119	0	0	0	0.71891	0.511504	0.468626	0.482584	0.504329	0.201244	0.784342	0	0.222988	0.774664	0	0	0.498624	0	0	0.403419	0	0	0.365966	0.632768	0.757606	0	0	0.504668	0.855109	0.573907	0.390494	0.507557	0.796095	0.529619	1.02844	0.967751	0	0.394406	0.555636	0.465115
0.365473	0	0	0.560847	0.00202114	0.529674	0	0	0.360649	0.431986	0.213761	0	0	0	0.533099	0.217669	0.783514	0.364376	0.590895	0.82009	0.531943	0	0.617415	0.409516	0	0	0.420812	0	0	0.466005	0	0	0.456165	0.54593	0.629009	0	0	0.51055	0.398984	0.550776	0.347809	0.351858	0.659206	0.603792	0.544623	0.642502	0	0.557877	0.575199	0.300061
0.187559	0	0	0.169109	0.119415	0.232357	0	0.195655	0.211881	0.181906	0.322027	0	0	0	0.204044	0	0.268622	0.26187	0.288911	0.298227	0.43774	0	0.317222	0.28205	0	0	0.305135	0	0	0.0810299	0	0	0.236319	0.318677	0.366891	0	0	0.28391	0.381233	0.100977	0.138113	0.267911	0.35139	0.256874	0.286665	0.323215	0	0.299279	0.165211	0.319371
0.573412	0	0	0.582453	0.405081	0.312088	0	0	0.31579	0.598256	0.491234	0	0	0	0.900664	0.353078	0.566185	0.709655	0.477186	0.859657	0.791698	0	0.486912	0.545541	0	0	0.842514	0	0	0.603656	0	0	0.575159	1.23511	1.49211	0	0	0.580995	0.951092	0.607078	0.388961	0.564009	0.717492	1.28555	1.03696	1.05652	0	0.84904	0.908093	0.566886
0.383201	0	0	0.388031	0.337262	0.519797	0	0	0.406867	0.21239	0.418576	0	0	0	0.456749	0.449856	0.480579	0.514081	0.558073	0.628555	0.359809	0	0.628035	0.245206	0	0	0.919202	0	0	0.616287	0	0	0.432123	0.610981	0.700493	0	0	0.531293	0.378855	0.602662	0.245167	0.284589	0.565942	0.851778	0.479845	0.602148	0	0.712246	0.655176	0.535947
0.603471	0	0	0.654858	0.864545	0.58566	0	0	0.812598	1.293	0.251875	0	0	0	1.10515	0.502213	0.555771	0.539061	0.387527	1.05872	0.729066	0	0.586909	0.525039	0	0	0.703431	0	0	0.806102	0	0	0.458702	1.29988	1.14579	0	0	0.443914	0.663644	0.83057	0.296124	0.872485	0.9958	1.41866	1.21585	1.32691	0	1.03899	1.26745	0.330583
0.1977	0	0	0.462802	0.258496	0.394969	0	0	0.420567	0.465345	0.201939	0	0	0	0.737087	0.258785	0.48799	0.453772	0.544018	0.0389859	0.518344	0	0.63209	0.509776	0	0	0.489317	0	0	0.377319	0	0	0.378086	0.60772	0.544654	0	0	0.26498	0.507409	0.5369	0.051492	0.249851	0.323228	0.891216	0.395887	0.62482	0	0.538918	0.391902	0.367558
0.159012	0	0	0.0922735	0.492015	0.469506	0	0	0.564701	0.56022	0.191555	0	0	0	0.752919	0.384914	0.215577	0.371039	0.774207	0.574128	0.67844	0	0.650753	0.245527	0	0	0.613152	0	0	0.549871	0	0	0.342948	0.555701	0.601529	0	0	0.491492	0.697275	0.689139	0.202705	0.54355	0.662893	0.731331	0.475455	0.809574	0	0.56354	0.807019	0.237154
0.470633	0	0	0.177816	0.418653	0.278629	0	0	0.911834	0.444151	0.0203423	0	0	0	0.59713	0.414212	0.859633	0.76147	0.931676	0.0366841	0.694264	0	0.293892	0.512156	0	0	0.747537	0	0	0.689646	0	0	0.39315	0.709133	0.812611	0	0	0.296341	0.594344	0.986276	0.346198	0.383864	0.467222	0.750858	0.302997	1.0329	0	0.817657	0.659937	0.392712
0.666347	0	0	0.309081	0.738678	0.294628	0	0	0.810679	0.523374	0.0782206	0	0	0	0.755772	0.764806	0.436432	0.836034	0.720329	0.618185	0.817046	0	0.456456	0.494458	0	0	0.827682	0	0	1.26551	0	0	0.46143	1.04593	0.919342	0	0	0.255674	0.592676	0.801361	0.228112	0.700193	0.571611	1.08126	0.762118	1.11054	0	0.806467	0.811311	0.532616
1.35525	0	0	1.31185	1.79052	1.06314	0	0	1.27602	1.07074	0.553164	0	0	0	1.75808	1.25915	1.13962	1.88852	1.50247	0.296549	1.35646	0	1.12176	1.30219	0	0	1.61219	0	0	2.10142	0	0	0.244705	2.74731	2.09635	0	0	0.546898	1.01465	1.84292	0.764618	1.98935	1.19627	1.14673	1.11156	1.61596	0	1.77585	2.33128	1.58304
0.790051	0	0	0.387699	0.765238	0.582182	0	0	0.704634	1.20956	0.372305	0	0	0	1.09095	0.467617	1.21057	0.609623	0.171571	1.26705	0.911289	0	0.420193	0.665913	0	0	1.07603	0	0	0.343545	0	0	0.958287	0.749604	0.566686	0	0	1.52891	0.524446	1.00955	0.32241	0.611511	0.921505	1.61258	0.803292	1.22308	0	0.956156	1.2203	0.434033
0.42083	0	0	0.626054	0.386597	0.191716	0	0	1.04738	0.597595	0.40134	0	0	0	0.715669	0.672634	0.608507	0.808862	0.738494	0.600169	0.271459	0	0.398687	0.19323	0	0	0.77381	0	0	0.915138	0	0	0.278717	1.2	1.15238	0	0	0.56238	0.432612	0.953011	0.482049	0.604267	0.600398	1.1046	0.42071	1.20737	0	0.759314	1.07586	0.673279
0.576735	0	0	1.35387	1.48712	1.22821	0	0	1.09998	2.36607	0.580679	0	0	0	2.27315	0.779259	0.72369	1.74197	0.923968	1.13826	0.96718	0	1.51043	1.49514	0	0	1.71209	0	0	1.2489	0	0	0.944461	1.27139	1.50533	0	0	0.441994	1.55265	0.795853	0.37549	1.50593	0.959767	2.22145	1.60077	1.98841	0	1.26289	1.75473	1.25475
0.250286	0	0	0.271833	0.17323	0.199872	0	0.0949133	0.35267	0.387282	0.288111	0	0	0	0.235397	0	0.433801	0.256267	0.387366	0.293828	0.291264	0	0.432385	0.231041	0	0	0.293764	0	0	0.231829	0	0	0.289583	0.413192	0.480411	0	0	0.440547	0.45848	0.42244	0.288152	0.267018	0.421462	0.498395	0.484952	0.367248	0	0.378612	0.424031	0.330155
0.587795	0	0	0.954687	0.679648	0.453725	0	0	0.751871	2.67381	0.320389	0	0	0	1.68771	0.701607	0.870744	0.575868	0.581884	0	0.803271	0	0.306443	0.778236	0	0	0.446085	0	0	0.221229	0	0	1.13154	0.963193	0.889571	0	0	1.81137	0.812113	1.90276	0.38894	0.908611	1.10025	1.13594	0.886819	1.69245	0	0.466473	1.47063	0.433246
1.42111	0	0	1.29121	1.28668	0.823023	0	0	2.57792	0.724468	0.342874	0	0	0	0.881774	3.9201	1.01826	0.0481058	1.88973	0.9893	1.32321	0	1.25745	1.42431	0	0	0.488743	0	0	3.23907	0	0	0.572695	2.52377	0.981306	0	0	2.30655	0.926355	3.71915	0.6858	1.5627	1.94162	2.24837	1.01957	2.39196	0	2.24391	3.2298	0.798774
0.648555	0	0	1.13712	0.998347	0.960196	0	0	3.16608	1.15574	0.747083	0	0	0	1.32659	4.39227	0.802144	1.31733	1.39459	0	1.49189	0	0.599262	0.918837	0	0	2.03491	0	0	1.99298	0	0	1.29662	0.946912	2.13565	0	0.228573	1.06342	1.82035	3.6117	0.493059	1.57021	0.528733	0.218675	0.796723	2.25977	0	1.30562	2.36287	0.942729
1.07651	0	0	0.479882	0.965382	0.532295	0	0	1.79279	0.442496	0.225594	0	0	0	1.29739	2.74248	0.698783	0.621198	0.938286	0.295701	0.933603	0	0.618008	0.838023	0	0	0.629638	0	0	1.51597	0	0	0.642941	1.32408	1.10141	0	0	1.25325	1.02733	2.45053	0.31897	1.50017	0.842191	0.946903	0.698434	1.95593	0	1.21232	1.55914	0.317872
0.780571	0	0	0.810411	0.818086	0.413148	0	0	1.76677	0.836241	0.285112	0	0	0	0.659336	2.18002	1.09988	0.47021	1.21389	1.00906	0.854944	0	0.891834	0.87153	0	0	0.839602	0	0	1.3715	0	0	0.889963	1.35009	0.767573	0	0	1.8423	0.618709	2.53564	0.404993	1.02443	1.34731	1.26992	0.741879	2.03417	0	1.13941	2.26694	0.304589
0.376088	0	0	0.813144	0.63064	0.671342	0	0	0.605747	1.64672	0.401982	0	0	0	0.821142	1.36184	0.403512	0.510015	1.24241	1.01147	0.435632	0	0.523084	0.700086	0	0	0.697495	0	0	1.08674	0	0	1.50726	0.98828	0.842643	0	0	1.29601	0.947395	1.38411	0.196906	0.778392	1.28127	1.28104	1.3826	1.72272	0	1.11069	2.54314	0.354183
0.860065	0	0	0.553333	0.728302	0.544797	0	0	1.69578	1.35401	0.367628	0	0	0	1.34802	0.507064	1.21104	0.518677	0.952524	0.413829	0.828089	0	0.894372	0.795088	0	0	0.938714	0	0	0.263933	0	0	0.927376	0.926841	1.4571	0	0	1.27695	1.07556	1.06297	0.233172	0.67139	1.16321	2.03199	0.626515	1.48847	0	0.620433	1.49271	0.589078
0.508468	0	0	0.540246	0.486278	0.299616	0	0	0.628856	0.5997	0.478696	0	0	0	0.602434	0.407921	0.338935	0.550242	0.439736	0.401045	0.710927	0	0.754355	0.723533	0	0	0.373207	0	0	0.501816	0	0	0.440703	0.574695	0.505043	0	0	0.436559	0.864161	0.631848	0.146814	0.674369	0.631166	0.907434	0.434647	0.693335	0	0.497941	0.672991	0.121702
0.383956	0	0	0.614752	0.47184	0.51965	0	0	0.719989	0.746739	0.119808	0	0	0	0.637036	0.875278	0.620964	0.628298	0.564145	0.551466	0.70174	0	0.739503	0.476461	0	0	0.591677	0	0	0.906973	0	0	0.433697	0.84651	1.08417	0	0	0.454328	0.367679	0.916076	0.01147	0.375362	0.69286	0.758198	0.529797	1.00203	0	0.746263	0.959063	0.45329
0.857955	0	0	0.383545	0.906153	0.506626	0	0	1.27501	0.518321	0.022001	0	0	0	1.35387	1.27219	0.48741	0.965511	1.06537	1.22871	0.503874	0	0.637107	1.18581	0	0	1.27158	0	0	1.13794	0	0	1.44293	1.21973	0.84653	0	0	0.997374	0.933409	1.09365	0.102595	0.686531	0.951942	1.83993	0.581964	1.7035	0	0.656264	1.11016	0.466779
0.908414	0	0	0.972933	0.901784	1.16138	0	0	2.37296	1.04286	0.455623	0	0	0	1.20143	3.21401	0.983437	0.688452	1.08397	0.431924	1.8041	0	0.468397	1.22405	0	0	1.50186	0	0	1.78733	0	0	0.858655	0.958509	1.33832	0	0	1.69265	1.19315	3.03245	0.598642	1.37212	0.958005	1.16985	0.847285	1.94334	0	1.15315	2.62681	0.619838
0.281092	0	0	0.453052	0.274081	0.403196	0	0	0.411815	0.583807	0.185196	0	0	0	0.585504	0.378053	0.354906	0.345592	0.539584	0.0910214	0.547982	0	0.436727	0.361345	0	0	0.432859	0	0	0.398443	0	0	0.42091	0.481801	0.37863	0	0	0.368528	0.683131	0.781461	0.412978	0.684844	0.4456	0.487468	0.227476	0.648778	0	0.484604	0.407496	0.239107
0.482792	0	0	0.873087	1.24881	0.762753	0	0	1.45665	0.8862	0.362284	0	0	0	0.731992	2.07605	0.959492	0.355294	1.0489	0.530721	1.03049	0	1.21646	0.795281	0	0	0.56043	0	0	1.85943	0	0	0.781276	1.61281	1.1929	0	0	1.20896	0.78368	2.10336	0.402708	1.03533	1.83403	2.04588	1.20816	1.28862	0	1.44844	2.76843	0.772922
1.11112	0	0	1.14216	0.846558	0.293617	0	0	1.0172	1.56395	0.147868	0	0	0	1.63293	3.14326	0.836523	0.634369	1.48655	1.84941	0.475098	0	1.15623	1.33972	0	0	0.490634	0	0	2.91268	0	0	1.64048	1.90968	0.441017	0	0	2.3868	0.873182	2.91788	0.556374	1.39476	2.20742	1.74938	1.03457	2.9159	0	2.06938	2.10399	0.709147
0.85194	0	0	0.814029	0.67162	0.538899	0	0	1.647	1.39583	0.393009	0	0	0	0.884254	1.83921	0.415546	0.308633	1.75313	0.145132	0.915381	0	0.597117	0.795169	0	0	0.773975	0	0	1.02644	0	0	1.34032	1.24279	1.05756	0	0	1.63578	1.10826	2.3846	0.327489	0.672146	1.05103	1.34894	0.677584	1.59879	0	1.1226	2.17735	0.34025
0.632934	0	0	0.595867	0.420406	0.338256	0	0	1.75342	0.883499	0.20025	0	0	0	1.37451	1.28498	1.13723	0.481245	0.673696	0.104091	0.790039	0	0.22833	0.691805	0	0	0.776008	0	0	0.631717	0	0	0.787881	1.00418	0.656639	0	0	1.80037	0.795438	2.41695	0.345309	1.36087	0.602867	0.645714	0.344857	2.08283	0	1.08575	0.691357	0.213572
1.13066	0	0	0.806707	0.572571	0.670323	0	0	1.77983	2.03107	0.057115	0	0	0	1.31043	1.43304	1.17699	0.559766	1.22446	0.931339	1.27012	0	0.516186	0.782456	0	0	0.754621	0	0	0.433621	0	0	1.80981	1.09865	1.56281	0	0	2.23802	1.08482	3.03576	0.466713	0.893413	0.75559	1.3348	0.944354	2.37022	0	1.3786	1.79214	0.465583
0.808721	0	0	1.1099	0.722351	0.842927	0	0	2.35242	1.72775	0.434992	0	0	0	1.22909	2.51691	1.10859	1.12187	1.50965	2.08324	1.50747	0	0.385844	1.02715	0	0	1.54479	0	0	1.18024	0	0	1.4733	1.21093	1.20287	0	0	2.70034	1.25587	2.92786	0.561667	0.89638	0.997132	1.37743	0.239237	2.96403	0	1.31739	2.54465	1.0436
0.521432	0	0	0.604462	0.770394	0.223884	0	0	0.968658	0.752267	0.323564	0	0	0	1.03406	0.519031	0.575362	0.768783	0.453796	0.531052	0.679917	0	0.278929	0.797786	0	0	1.11203	0	0	0.733038	0	0	0.676683	0.442998	1.24043	0	0	0.73218	1.00387	0.453171	0.139051	0.625248	1.14215	1.1322	0.716292	1.30908	0	0.0944504	0.457312	0.846898
1.33972	0	0	0.589941	1.09586	0.726765	0	0	1.07764	2.37778	0.532377	0	0	0	0.8239	1.35981	1.33653	0.788323	1.44753	1.56083	0.996935	0	0.69472	1.09783	0	0	1.00012	0	0	0.943847	0	0	2.1837	0.950871	1.19648	0	0	2.47041	1.0351	2.00044	0.5136	0.786211	1.27417	2.06363	1.46545	1.6247	0	1.35048	2.78917	0.739263
0.295804	0	0	0.346673	0.0837765	0.531939	0	0	0.473976	0.424276	0.280219	0	0	0	0.70769	0.30613	0.306189	0.43	0.76437	0.606816	0.706729	0	0.579513	0.562434	0	0	0.55353	0	0	0.649375	0	0	0.48131	0.76929	0.351045	0	0	0.341474	0.530272	0.450495	0.106398	0.310838	0.504379	0.749011	0.720603	0.661741	0	0.742945	0.524046	0.405591
1.26639	0	0	0.419522	0.639394	0.29739	0	0	1.27843	1.48627	0.330294	0	0	0	0.955255	1.16213	0.882153	0.591188	1.08997	0.827057	0.538639	0	0.41718	0.682577	0	0	0.575246	0	0	0.496991	0	0	1.42287	0.745341	0.89497	0	0	1.59216	0.709078	1.61661	0.273954	0.741802	1.3445	1.30514	0.709036	1.57564	0	0.741313	1.69932	0.180842
0.990127	0	0	1.3663	0.982976	1.09878	0	0	2.71218	0.560401	0.6127	0	0	0	1.15553	4.99295	0.57195	0.88775	1.80628	0.73005	1.41418	0	1.5289	1.41033	0	0	2.22247	0	0	3.15495	0	0	0.922913	1.33567	1.41767	0	0	1.36612	1.29952	3.56914	0.668494	1.19074	0.596967	1.28806	0.487062	2.16805	0	1.33386	3.15051	1.03689
0.599703	0	0	0.719555	0.698756	0.547075	0	0	1.11382	0.663199	0.339947	0	0	0	0.978677	2.59996	0.705442	0.39386	1.16782	0.489472	0.610735	0	1.27706	0.780177	0	0	0.508579	0	0	2.32085	0	0	0.562569	1.82389	0.660707	0	0	1.48787	0.403138	2.60576	0.441346	1.25661	0.963004	1.05025	0.960814	1.74589	0	1.51305	1.66678	0.790452
0.559085	0	0	0.960716	0.582542	0.579811	0	0	1.46023	0.846764	0.374126	0	0	0	0.575877	2.44494	0.855752	0.810642	1.30333	1.21361	0.983918	0	0.674122	0.585395	0	0	1.08009	0	0	1.63669	0	0	0.700817	1.06142	0.929814	0	0	1.50327	0.802167	2.27832	0.350037	0.922405	0.649944	0.636214	0.290739	1.83762	0	1.07781	2.12212	0.62419
0.709537	0	0	0.956238	0.666111	0.380501	0	0	1.43095	1.77513	0.363684	0	0	0	0.96436	2.13783	0.903491	0.413357	1.23481	1.25338	0.967456	0	0.448156	0.778501	0	0	1.01272	0	0	1.2881	0	0	1.08813	0.760249	0.976704	0	0	2.18992	0.95451	2.57261	0.389665	0.894198	1.22632	1.30847	0.964139	2.38559	0	0.969157	2.21458	0.482019
0.954005	0	0	0.310822	0.841292	0.470204	0	0	0.779964	1.61111	0.0443635	0	0	0	0.749655	1.65123	0.438259	0.59469	1.19662	1.64367	0.284775	0	1.18657	0.860366	0	0	0.469155	0	0	1.59844	0	0	1.2384	1.36906	0.473855	0	0	1.46373	0.550941	1.44515	0.140106	0.528951	1.66642	2.03854	1.28217	1.84749	0	1.2811	1.91974	0.557844
0.658052	0	0	0.661981	0.630216	0.754145	0	0	1.02035	1.34823	0.202066	0	0	0	1.51341	0.536006	0.842964	0.77406	1.37444	1.6367	0.315868	0	0.798159	0.717052	0	0	0.99479	0	0	0.389928	0	0	1.58522	1.68007	0.979929	0	0	1.55259	0.77603	1.14569	0.0552454	0.826606	1.33784	1.78512	0.776644	2.20491	0	0.775559	1.33235	0.722903
0.297427	0	0	0.377728	0.301038	0.499282	0	0	0.369443	0.621368	0.450193	0	0	0	0.546117	0.448053	0.691786	0.488345	0.782819	0.787506	0.655481	0	0.281742	0.400841	0	0	0.91946	0	0	0.66575	0	0	0.591684	1.1763	1.05029	0	0	0.676365	0.452455	0.718732	0.26041	0.689629	1.02273	0.846938	1.01031	0.860581	0	0.462365	0.729895	0.266126
0.322844	0	0	0.303674	0.194789	0.0962023	0	0	0.284877	0.158065	0.285575	0	0	0	0.577117	0.757214	0.159059	0.351928	0.0441356	0.142858	0.240232	0	0.370536	0.247602	0	0	0.32294	0	0	0.891023	0	0	0.288845	0.342074	0.140423	0	0	0.116016	0.13904	0.467948	0.230148	0.427699	0.219956	0.10186	0.286597	0.201844	0	0.118277	0.344372	0.292584
0.159965	0	0	0.117599	0.20157	0.142201	0	0	0.0592735	0.23449	0.123868	0	0	0	0.334931	0.0407684	0.161167	0.229078	0.178331	0.0597109	0.072211	0	0.266007	0.144148	0	0	0.177234	0	0	0.471908	0	0	0.193363	0.279623	0.178371	0	0	0.165589	0.127761	0.196963	0	0.140625	0.308561	0.22906	0.289509	0.177776	0	0.253097	0.304965	0.188793
0.135331	0	0	0.0720908	0.0642464	0.057943	0	0.0790491	0.123056	0.0758155	0.1433	0	0	0	0.291613	0	0.0985461	0.274519	0.175145	0.119126	0.0467922	0	0.218373	0.0945865	0	0	0.284047	0	0	0.280488	0	0	0.211481	0.252944	0.241765	0	0	0.233232	0.0983073	0.2023	0.170616	0.259798	0.213503	0.115611	0.176296	0.197581	0	0.179258	0.24585	0.207037
0.213619	0	0	0.129418	0.107	0.132043	0	0.416924	0.110974	0.0333735	0.171895	0	0	0	0.245908	0	0.0466519	0.122783	0.106115	0.228521	0.181607	0	0.124733	0.147283	0	0	0.168635	0	0	0.303809	0	0	0.182777	0.173499	0.0386541	0	0	0.112717	0.165539	0.0784059	0.0823136	0.234286	0.132895	0.28437	0.161002	0.0891751	0	0.21807	0.0884381	0.17298
0.2298	0	0	0.127315	0.182026	0.176023	0	0	0.0880937	0.293859	0.116599	0	0	0	0.514804	0.135644	0.164716	0.505821	0.115747	0.0643798	0.171473	0	0.248215	0.130514	0	0	0.379427	0	0	0.411743	0	0	0.208296	0.266345	0.397094	0	0	0.153351	0.271391	0.279152	0.136327	0.339428	0.26775	0.312334	0.334552	0.264762	0	0.284414	0.226521	0.237599
0.226662	0	0	0.212931	0.207164	0.256246	0	0	0.178821	0.31579	0.318265	0	0	0	0.373756	0.164894	0.224022	0.287714	0.236641	0.345896	0.18359	0	0.46277	0.25827	0	0	0.223461	0	0	0.524802	0	0	0.259475	0.392125	0.321738	0	0	0.147622	0.180767	0.186867	0.240664	0.388501	0.417724	0.41835	0.308528	0.309024	0	0.317817	0.30411	0.249367
0.597211	0	0	0.330636	0.427498	0.314442	0	0	0.511657	0.584484	0.492513	0	0	0	0.385908	0.312719	0.523833	0.503322	0.414585	0.288402	0.564372	0	0.465871	0.533742	0	0	0.552472	0	0	0.434148	0	0	0.354844	0.355959	0.493312	0	0	0.740425	0.663052	0.337922	0.241574	0.653648	0.682387	0.408669	0.830574	0.56626	0	0.48391	0.488051	0.364799
0.377679	0	0	0.474954	0.187671	0.52001	0	0	0.508366	0.712529	0.398981	0	0	0	0.301444	0.497333	0.320519	0.44968	0.639658	0.589709	0.783215	0	0.626481	0.460756	0	0	0.623014	0	0	0.67049	0	0	0.719667	0.481606	0.240718	0	0	0.823868	0.737438	0.327885	0.433124	0.451593	0.750508	0.416447	0.995203	0.576834	0	0.641262	0.80716	0.462649
0.462493	0	0	0.429866	0.124355	0.512546	0	0	0.290222	0.262788	0.37737	0	0	0	0.61929	0.17152	0.174503	0.245421	0.405452	0.328757	0.507009	0	0.480411	0.226042	0	0	0.381746	0	0	0.606284	0	0	0.366102	0.372572	0.135379	0	0	0.304299	0.464598	0.183589	0.116833	0.381919	0.268999	0.501679	0.767693	0.542711	0	0.372066	0.482005	0.579729
0.345738	0	0	0.598302	0.282037	0.472726	0	0	0.522165	0.523261	0.427999	0	0	0	0.569527	0.549313	0.445833	0.364377	0.381372	0.616253	0.794331	0	0.681672	0.459631	0	0	0.571697	0	0	0.405749	0	0	0.321184	0.606564	0.594853	0	0	0.584829	0.574946	0.488043	0.406785	0.342873	0.577309	0.59797	0.702896	0.700912	0	0.378436	0.793791	0.673098
0.295581	0	0	0.374503	0.177212	0.511081	0	0	0.57083	0.491997	0.326181	0	0	0	0.447446	0.282125	0.32568	0.349237	0.427888	0.328382	0.684841	0	0.488585	0.413026	0	0	0.451375	0	0	0.36872	0	0	0.392894	0.569548	0.671173	0	0	0.362496	0.429489	0.706326	0.269331	0.220884	0.443487	0.510272	0.512676	0.779064	0	0.318703	0.41592	0.522033
0.398546	0	0	0.479929	0.373698	0.416865	0	0	0.620838	0.759294	0.338017	0	0	0	0.777272	0.0446291	0.632465	0.37086	0.470428	0.496472	0.416539	0	0.69196	0.26611	0	0	0.604075	0	0	0.374586	0	0	0.342859	0.535275	0.527279	0	0	0.627463	0.343202	0.652534	0.480923	0.583117	0.705491	0.912707	0.659467	0.736479	0	0.369082	0.7219	0.280128
0.290701	0	0	0.623184	0.247825	0.378919	0	0	0.228316	0.52081	0.246794	0	0	0	0.503539	0.225118	0.298726	0.340443	0.56076	0.283576	0.446137	0	0.557703	0.290034	0	0	0.428723	0	0	0.349887	0	0	0.258951	0.552065	0.419625	0	0	0.334693	0.339806	0.428768	0.245113	0.259948	0.377567	0.781128	0.594203	0.558317	0	0.502121	0.394072	0.358031
0.301774	0	0	0.21304	0.203941	0.65673	0	0	0.833346	0.613408	0.180155	0	0	0	0.458212	0.491966	0.245809	0.495243	0.638518	0.398879	0.850525	0	0.513931	0.603738	0	0	0.577685	0	0	0.625535	0	0	0.330972	0.331465	0.875884	0	0	0.488433	0.933027	0.767694	0.156897	0.652449	0.798218	0.368265	0.252052	0.843045	0	0.582025	0.347254	0.235257
0.193043	0	0	0.422263	0.385624	0.145828	0	0	0.344796	0.425348	0	0	0	0	0.30217	0.193499	0.479128	0.29325	0.625094	0.455877	0.52788	0	0.645187	0.285515	0	0	0.278863	0	0	0.757444	0	0	0.253716	0.671061	0.403717	0	0	0.292096	0.16957	0.657262	0.233651	0.245828	0.524225	0.598321	0.455853	0.88562	0	0.687345	0.260762	0.125669
0.732192	0	0	0.270052	0.669607	0.640405	0	0	0.536127	0.226078	0.143139	0	0	0	0.57896	0.683423	0.497948	0.973577	0.594507	0.490709	0.723612	0	0.758834	0.634458	0	0	0.777915	0	0	1.05088	0	0	0.248579	1.07941	0.856806	0	0	0.336267	0.627375	0.770329	0.269393	0.540995	0.556179	0.768666	0.810541	1.1542	0	0.615558	0.472246	0.546066
0.521027	0	0	0.521814	0.673337	0.462732	0	0	0.748759	0.448467	0.215695	0	0	0	0.941818	0.275183	0.553395	0.775621	0.649651	0.341776	0.626899	0	0.336107	0.502508	0	0	0.749772	0	0	0.868108	0	0	0.318015	1.03227	0.850581	0	0	0.307912	0.56455	0.909734	0.192294	0.784113	0.551646	0.496259	0	0.676831	0	0.665495	0.709534	0.431031
0.500764	0	0	0.41352	0.84904	0.556014	0	0	1.13586	1.77059	0.373858	0	0	0	0.948428	0.800131	1.24977	0.886156	0.143134	0.41345	0.836888	0	0.358291	0.909037	0	0	0.884741	0	0	0.357414	0	0	0.926815	0.771983	1.07695	0	0	1.72161	0.884828	1.42677	0.469779	1.2158	1.63437	1.38881	1.34587	1.64249	0	0.668027	1.57133	0.370218
0.351881	0	0	0.837271	0.662054	0.530278	0	0	1.21952	0.88851	0.329035	0	0	0	1.05107	0.933081	0.583391	1.02567	0.926246	0.439657	0.579023	0	0.616873	0.487109	0	0	1.05571	0	0	1.10285	0	0	0.551496	1.10698	1.17271	0	0	0.436454	0.486411	1.0905	0.544588	0.766144	0.803542	1.02974	0.44448	1.4452	0	1.22501	1.34346	0.417039
1.25886	0	0	2.06727	0.917297	1.56399	0	0	1.37216	1.61573	1.48069	0	0	0	2.63856	1.17687	1.80285	1.85655	1.35818	0.639257	1.79152	0	1.51968	1.46916	0	0	2.22323	0	0	1.95092	0	0	0.911043	1.44254	1.99662	0	0	0.78838	2.58525	1.12916	0.68743	2.43597	0.842513	1.62059	0.229512	2.21116	0	1.52625	2.52446	1.32678
0.392171	0	0	0.336544	0.395122	0.326935	0	0	0.658598	0.558998	0.394997	0	0	0	0.565785	0.341917	0.355843	0.625254	0.385547	0	0.608698	0	0.407246	0.448264	0	0	0.645497	0	0	0.2616	0	0	0.369463	0.329992	0.833346	0	0.0943428	0.404013	1.18034	0.624492	0.271128	0.671649	0.685924	0.593228	0.603132	0.868709	0	0.637949	0.554761	0.525345
0.555035	0	0	0.876969	0.920829	0.634453	0	0	0.982304	1.73506	0.479642	0	0	0	2.20143	1.23547	1.54283	0.886944	0.53113	0.669116	1.11984	0	0.298049	1.24627	0	0	1.17183	0	0	0.424317	0	0	1.15804	1.54524	1.21095	0	0	2.57916	1.04296	2.06571	0.214847	1.55604	1.21942	1.51772	1.13111	2.24605	0	0.264871	0.852513	0.602875
0.716744	0	0	0.624717	0.614431	0.41291	0	0	1.55787	0.780145	0.176865	0	0	0	0.690393	1.34622	0.858304	0.409431	1.40702	1.14929	0.696698	0	0.347621	0.639966	0	0	0.536381	0	0	1.20308	0	0	1.10082	1.33891	0.614844	0	0	1.75261	0.502171	1.65086	0.464529	0.656128	1.4894	1.38141	0.488641	1.44202	0	1.29763	1.84886	0.452402
0.746141	0	0	0.496203	0.57819	0.511124	0	0	1.57411	0.462926	0.404943	0	0	0	0.621888	2.28155	0.436766	0.534743	1.55787	0.917615	0.876843	0	0.68351	0.576446	0	0	1.11374	0	0	1.42629	0	0	1.13367	1.32287	1.22701	0	0	1.32956	0.915005	2.39878	0.264911	0.72554	0.476822	0.789404	0.428994	1.87804	0	1.39342	1.8254	0.551725
1.17133	0	0	0.993853	0.907774	0.563887	0	0	1.45222	1.02317	0.325792	0	0	0	0.772508	3.22794	0.966875	0.366357	1.69049	1.11698	0.501354	0	1.19619	0.970462	0	0	0.674935	0	0	2.35408	0	0	0.590011	1.61298	1.10521	0	0	1.62157	0.407372	3.02839	0.451274	0.946781	1.04029	1.40762	0.763672	2.12981	0	1.74067	2.56994	0.640196
0.610931	0	0	0.628569	0.511711	0.527619	0	0	1.94911	0.977883	0.155679	0	0	0	0.95046	1.99486	0.843846	0.554064	1.07684	0.305033	1.03427	0	0.470272	0.745674	0	0	0.751876	0	0	1.06731	0	0	0.73173	1.25541	0.916519	0	0	1.43441	0.745264	2.7019	0.229154	1.02526	0.700645	0.899239	0.484179	1.91566	0	1.29333	1.26912	0.273271
0.925609	0	0	0.596833	0.603564	0.576177	0	0	1.9821	1.32572	0.265986	0	0	0	1.19823	1.23486	1.1082	0.883066	1.09663	0.529588	0.494181	0	0.7639	0.741122	0	0	0.90138	0	0	0.742812	0	0	1.04191	1.50705	1.00694	0	0	1.58361	0.861679	1.80957	0.228251	1.12048	1.71467	1.69444	0.972686	2.22657	0	0.947094	1.4874	0.524053
0.581628	0	0	0.739388	0.533776	0.48507	0	0	0.675865	1.13926	0.340715	0	0	0	0.970318	0.556912	0.584556	0.644463	0.574646	1.17027	0.843393	0	0.396622	0.647729	0	0	1.14103	0	0	0.596262	0	0	1.17786	1.40327	1.07646	0	0	0.846872	0.67364	0.665195	0.0876568	0.955462	0.819873	1.70206	0.861952	1.38349	0	0.88387	1.20727	0.338068
0.250239	0	0	0.350911	0.147226	0.263749	0	0	0.666955	0.291495	0.161155	0	0	0	0.464234	0.265428	0.296304	0.262956	0.490159	0.436768	0.469706	0	0.631931	0.411314	0	0	0.307677	0	0	0.436419	0	0	0.470968	0.671072	0.50942	0	0	0.414835	0.487002	0.636236	0.344798	0.156395	0.480799	0.739188	0.386459	0.616143	0	0.371203	0.557848	0.208955
0.193319	0	0	0.53992	0.551581	0.256919	0	0	0.65137	0.552452	0.0978442	0	0	0	0.618064	1.28147	0.311178	0.816902	0.972885	1.12807	0.564926	0	0.498546	0.297684	0	0	0.883475	0	0	1.06332	0	0	0.448503	0.951357	0.958852	0	0	0.627467	0.614084	1.03716	0.300132	0.589165	0.847869	1.11002	0.543984	1.11364	0	0.998334	1.10836	0.447485
0.772904	0	0	0.451896	0.49941	0.641289	0	0	0.844232	0.880103	0.438195	0	0	0	1.1545	0.580293	0.753891	0.778686	0.937327	0.858298	0.725651	0	0.306243	0.555443	0	0	1.19655	0	0	0.657721	0	0	0.962732	1.1999	0.980674	0	0	1.37326	0.749159	1.01172	0.409471	0.540619	1.33371	1.02453	0.575999	1.70304	0	0.848676	1.19117	0
0.680291	0	0	0.473509	0.667825	0.212614	0	0	1.18331	0.869103	0.318309	0	0	0	0.681645	1.79751	0.417935	0.340901	1.53802	1.01911	0.634734	0	0.974833	0.609584	0	0	0.922798	0	0	1.30243	0	0	0.858613	1.51992	0.845061	0	0	1.61742	0.845753	2.02017	0.598129	0.560203	1.01006	1.29581	0.89324	1.80479	0	0.955855	1.9414	0.582847
0.392716	0	0	0.359178	0.206583	0.342548	0	0	0.40461	0.35704	0.441816	0	0	0	0.55625	0.982379	0.482871	0.465661	0.710692	0.893213	0.334982	0	0.822542	0.628815	0	0	0.674261	0	0	0.95102	0	0	0.165036	0.770832	0.759105	0	0	0.84087	0.539212	0.809342	0.476692	0.680317	0.867688	0.69379	0.597947	0.75119	0	0.870147	0.773348	0.441339
0.501647	0	0	0.399435	0.57853	0.629555	0	0	0.586224	0.606741	0.0789114	0	0	0	0.481101	0.526828	0.688074	0	0.771576	0.736099	0.507193	0	0.658647	0.41663	0	0	0.524255	0	0	0.611556	0	0	0.802021	0.903507	0.889151	0	0	0.963581	0.634544	1.10483	0.283765	0.742746	1.15539	1.23104	1.05926	1.07672	0	0.621642	1.59532	0.459674
1.30918	0	0	0.866846	0.87105	0.304849	0	0	0.974619	2.20507	0.386882	0	0	0	2.04698	2.46386	0.940135	0.234538	1.76336	1.52508	0.831293	0	1.10567	1.39217	0	0	0.955405	0	0	1.82613	0	0	2.43979	1.64317	1.0019	0	0	2.71125	1.19232	3.05682	0.503963	1.06464	1.80384	1.98172	1.18661	2.79926	0	1.52435	2.41778	0.753874
1.06967	0	0	0.550372	0.814982	0.308673	0	0	1.14738	1.46725	0.258489	0	0	0	0.867872	1.76319	0.521985	0.270484	1.88402	1.14639	0.350449	0	1.10304	0.898449	0	0	0.447606	0	0	1.86663	0	0	1.04173	1.58793	0.302544	0	0	2.01396	0.627072	2.19507	0.35317	0.549536	1.39794	1.89522	0.948267	2.07814	0	1.52154	1.96654	0.362861
1.10831	0	0	0.497618	0.314158	0.381164	0	0	1.69785	1.15069	0.228123	0	0	0	1.4304	1.22025	1.15154	0.598193	1.31084	1.62381	0.75481	0	0.429877	0.989098	0	0	0.686421	0	0	1.38281	0	0	1.00353	1.56559	0.454896	0	0	2.24741	0.789622	2.33903	0.322819	1.28247	1.16618	1.28483	0.433123	2.68149	0	1.77277	1.06814	0.24768
1.11448	0	0	0.75261	0.686678	0.503802	0	0	1.35194	2.11222	0.0904701	0	0	0	0.970963	1.18923	0.732658	0.460962	1.38994	1.00097	0.780406	0	0.782989	0.764979	0	0	0.745679	0	0	0.535779	0	0	1.93092	0.857636	1.3976	0	0	1.99133	1.01259	2.3577	0.448952	0.709453	0.992204	1.42567	1.09215	1.94482	0	1.19964	1.82188	0.374785
0.845518	0	0	0.618912	0.704308	0.442872	0	0	0.856383	1.21473	0.254283	0	0	0	0.86024	0.703664	0.600725	0.671986	0.619244	1.34732	0.716408	0	0.673413	0.483645	0	0	0.727865	0	0	0.292171	0	0	1.08968	0.943725	0.632002	0	0	1.49312	0.564111	1.23154	0.287561	0.73824	1.13308	1.18473	0.643518	1.91977	0	0.653872	1.74769	0.581342
0.39176	0	0	0.300485	0.710392	0.345782	0	0	0.877621	0.708784	0.282358	0	0	0	1.34473	0.44514	0.551454	0.480781	0.544181	0.800324	0.585528	0	0.774847	0.936319	0	0	0.646335	0	0	0.762306	0	0	0.868025	0.507046	1.04263	0	0	0.798494	0.695234	0.486115	0.072259	0.360172	0.894967	1.18792	0.76325	1.53261	0	0.387906	1.04386	0.662202
0.564488	0	0	0.479311	0.679264	0.578409	0	0	0.414876	1.38906	0.254032	0	0	0	0.690376	0.875793	0.807639	0.486214	0.824376	0.783713	0.403965	0	0.728875	1.06064	0	0	0.575939	0	0	0.816117	0	0	1.32678	1.09539	0.884813	0	0	1.42242	0.49305	1.28887	0.224993	0.62215	1.02424	1.62889	1.17848	1.1721	0	0.703078	1.76705	0.436674
0.23865	0	0	0.43376	0.375362	0.432961	0	0	0.401866	0.575831	0.512236	0	0	0	0.483579	0.25346	0.447715	0.556228	0.465582	0.234802	0.725322	0	0.599578	0.510425	0	0	0.613923	0	0	0.476323	0	0	0.368726	0.417871	0.502346	0	0	0.437786	0.375349	0.315488	0.147694	0.416713	0.659985	0.365976	0.796769	0.590712	0	0.492819	0.572918	0.210323
1.37969	0	0	0.308841	0.80513	0.540891	0	0	0.904948	1.54486	0.350797	0	0	0	0.93019	0.733592	1.03939	0.607725	1.02034	0.891949	0.578251	0	0.749149	0.867263	0	0	0.610513	0	0	0.419654	0	0	1.71727	0.897112	0.903408	0	0	1.79094	0.661589	1.46544	0.279707	0.66976	1.4516	1.57342	0.897004	1.28351	0	0.700883	2.01131	0.217958
0.796626	0	0	0.840829	0.728645	0.718752	0	0	1.93675	0.738663	0.498781	0	0	0	0.625727	2.75322	0.611291	0.568734	1.49618	0.433589	1.03245	0	0.836025	0.791882	0	0	1.24965	0	0	1.5244	0	0	0.689274	1.00511	1.12328	0	0	1.11397	0.990295	2.65735	0.484043	0.715178	0.498442	1.09168	0.576415	1.42259	0	1.12587	2.61374	0.484606
0.573424	0	0	0.694388	0.567351	0.321771	0	0	1.3306	0.590892	0.414332	0	0	0	0.799491	2.37003	0.764634	0.348389	0.916129	0.0538693	0.837161	0	0.677414	0.879117	0	0	0.612308	0	0	1.47977	0	0	0.636632	1.27007	0.957742	0	0	1.59231	0.746436	2.58633	0.426568	1.14074	0.998773	0.836962	0.59677	1.50869	0	1.0599	1.53274	0.499732
0.850643	0	0	0.430958	0.525247	0.434475	0	0	1.16577	1.05141	0.227725	0	0	0	1.07394	1.83032	0.623158	0.491713	1.3415	1.78441	0.66813	0	0.814847	0.647335	0	0	0.799349	0	0	1.53841	0	0	1.17654	1.28135	0.53772	0	0	1.82465	0.605227	2.04785	0.139013	0.612132	1.17726	1.29542	0.567576	2.06196	0	1.3989	1.66871	0.287513
0.667247	0	0	0.646978	0.480057	0.5345	0	0	1.69036	1.09629	0.217261	0	0	0	1.05198	2.45525	0.53051	0.470815	1.50441	0.939489	0.630687	0	0.790566	0.85636	0	0	0.943261	0	0	1.64703	0	0	0.968184	1.30686	0.915068	0	0	1.30547	0.7603	2.47311	0.385761	0.887011	0.767491	0.931005	0.577143	1.82734	0	1.3544	1.78672	0.226048
1.11248	0	0	0.621809	0.789656	0.652156	0	0	1.55691	2.34303	0.159438	0	0	0	0.869441	1.56347	0.820453	0.88967	1.70718	1.31929	0.704532	0	0.888148	1.08409	0	0	0.786347	0	0	0.966828	0	0	2.04537	1.04969	1.06965	0	0	1.88301	0.985948	2.03792	0.374562	0.696172	2.01208	2.01955	0.931995	1.78536	0	1.15838	2.60649	0.40956
0.271793	0	0	0.416586	0.811045	0.54211	0	0	1.09246	1.05533	0.195107	0	0	0	0.976979	0.366508	0.620049	0.588807	0.709306	0.495254	0.660995	0	0.688356	0.682786	0	0	0.797002	0	0	0.291906	0	0	0.903102	0.71908	0.768952	0	0	0.910131	0.776227	0.755044	0.154863	0.856688	0.74188	1.20088	0.233986	1.22659	0	0.497109	0.842227	0.413047
0.424603	0	0	0.217108	0.3197	0.461795	0	0	0.862375	0.731153	0.16949	0	0	0	0.787136	0.310312	0.210513	0.196316	0.407518	0.602516	0.444578	0	0.552861	0.506476	0	0	0.626459	0	0	0.597689	0	0	0.704624	0.557443	0.47744	0	0	0.482721	0.499438	0.533171	0.58612	0.256924	0.654961	0.854594	0.806037	0.759002	0	0.727489	0.640049	0.511801
[truncated: 14 more columns]

## Sheet: FigS3
Number of Clusters	Inertia	Silhouette Score
1	10452.2
2	5918.14	0.371011
3	4605.35	0.324069
4	3986.39	0.244344
5	3635.22	0.244606
6	3386.56	0.199178
7	3189.02	0.200622
8	3021.62	0.195002
9	2897.78	0.196299
10	2787.88	0.193249
11	2684.41	0.184628
12	2602.01	0.179545

## Sheet: FigS6b
UMAP Dim 1, Raw Data	UMAP Dim 2, Raw Data	Cluster Number, Raw Data
12.6327	7.41716	4
-7.06818	7.52194	4
-7.13031	5.69652	4
-6.94354	3.93215	4
-6.90957	7.12208	4
-6.34429	7.90565	4
-4.88581	8.91624	4
-1.56625	10.8164	3
-4.52898	8.8542	4
-3.26169	8.99541	4
-1.68487	8.64543	3
-1.50318	9.78547	3
-2.1846	8.8903	3
-1.46216	9.00264	3
0.251841	7.14376	3
-0.069126	6.57688	3
0.0361617	5.99721	3
4.08626	7.42948	2
1.00216	9.81605	3
1.40949	10.6483	3
-3.84376	8.59266	4
6.39819	7.24053	2
4.16729	4.85945	1
4.76615	0.364292	1
4.21705	0.926802	1
3.58311	4.73054	1
1.99286	8.0813	3
1.79459	9.06646	3
-0.276591	9.58559	3
2.48702	5.46398	2
2.61901	7.22583	2
4.05092	5.61457	2
-1.29608	7.843	3
2.39582	7.50917	2
4.51677	9.66209	2
4.85418	2.97987	1
4.9814	5.03292	2
5.00954	5.435	2
3.05995	9.01299	3
3.65548	7.93335	2
4.25234	9.35088	2
-0.801122	8.38127	3
5.13438	7.12616	2
3.03732	0.022739	0
2.56764	-1.36446	0
6.09859	3.18084	1
4.32459	2.94454	1
3.55289	5.09971	2
1.96872	9.84642	3
-1.56005	7.95251	3
12.6231	7.40913	3
-7.21775	5.36251	4
-7.07957	6.21688	4
-6.94079	4.17092	4
-6.77975	7.39876	4
-6.26063	7.87022	4
-3.75835	9.36922	3
-1.63787	10.9598	3
-4.75659	8.68484	4
-0.816113	8.23464	3
-2.15639	9.53046	3
-0.940795	9.65496	3
-2.12729	9.73114	3
-0.825503	7.30546	3
-0.571283	7.5695	3
0.216629	6.21426	3
0.703136	9.42708	3
4.30608	7.67127	2
2.48587	8.16178	2
1.63418	10.6782	3
-1.0077	9.85122	3
6.33654	7.0313	2
3.74879	4.99786	2
4.12113	-0.641314	0
4.7658	3.6015	1
6.24627	3.5907	1
4.31973	6.01295	2
2.39981	9.04917	3
0.806736	7.15656	2
1.67342	6.41546	2
1.69453	8.05938	2
2.10782	6.78119	2
-0.406325	8.14999	3
5.03869	3.43847	1
4.56934	9.71407	2
3.63948	3.87651	1
6.10204	5.27104	2
3.65964	-0.822785	0
4.87655	4.61842	2
2.6758	8.59586	3
4.59955	7.67028	2
1.14434	9.12354	3
5.598	4.38144	1
1.3761	-1.6009	0
2.7389	-0.785022	0
5.94178	6.16228	2
4.55038	3.46581	1
2.77777	-0.834849	0
4.12626	8.36229	2
-0.140271	9.19317	3
13.248	8.22543	3
-7.38435	7.34069	4
-7.0491	5.8	4
-6.76685	4.32112	4
-6.25964	7.17595	4
-6.63277	7.797	4
-4.75587	9.09014	4
-1.6396	10.9215	3
-4.3992	8.64497	4
-2.90035	8.78169	3
-1.67839	8.24759	3
-0.837104	9.8436	3
-2.26601	9.83871	3
-0.910876	7.14043	3
-0.455479	6.54756	3
0.589722	9.63973	3
2.02037	9.05886	3
5.99967	3.20407	1
3.71807	8.26342	2
2.12105	10.1384	2
-0.819534	9.75826	3
5.9268	4.75941	1
5.30133	4.06145	1
5.13028	0.923505	1
4.39884	2.63758	1
6.48125	4.08226	1
3.17437	7.65778	2
5.77541	6.39875	2
0.908103	7.2552	3
1.72816	6.13062	2
3.5756	6.8434	2
2.47348	6.74803	2
1.94208	5.40246	2
3.21688	5.52089	2
5.93444	5.27486	2
3.52864	3.96288	1
6.00838	5.83547	2
4.54215	0.577121	1
3.18337	7.54087	2
1.87076	6.6027	2
5.35729	4.99726	2
2.01359	9.2342	3
3.43185	2.50378	1
2.52217	0.0648167	0
3.17371	-1.01665	0
4.64615	7.79319	2
2.09934	8.76525	3
3.50374	2.34859	1
3.49995	6.7072	2
3.10413	7.54533	2
13.222	8.32073	3
-7.52087	7.43839	4
-7.14636	5.96699	4
-6.73882	4.32275	4
-6.20761	7.05121	4
-5.61632	8.26478	4
-3.14215	9.21193	3
-1.68257	10.859	3
-4.10928	8.82609	4
-2.06506	8.7876	3
-2.02846	9.4019	3
2.68441	9.32173	3
4.03931	4.77399	2
1.30734	10.014	3
1.87967	9.70576	3
4.9495	6.81162	2
4.17808	5.81452	2
4.06552	4.82427	2
4.40837	6.3831	2
3.58966	7.49859	2
-3.45735	8.44141	4
2.75078	2.25355	1
3.62184	2.80345	1
3.91334	-0.815685	0
4.83063	2.52367	1
4.77809	6.02412	2
4.25518	9.49607	2
5.8463	6.13122	2
1.50876	6.13423	2
2.80168	3.09564	1
2.82792	3.61543	1
2.44443	3.54913	1
3.17421	1.39502	1
2.08699	-1.94886	0
3.4476	4.01474	1
3.89114	3.18358	1
5.98082	5.13016	2
4.26994	0.195687	0
3.37521	6.56351	2
-0.506342	8.23748	3
3.18644	2.67955	1
-0.634935	8.66548	3
3.06099	-0.831332	0
3.562	-0.0510068	0
2.81203	-1.11013	0
6.25964	4.62485	2
0.820514	9.26114	3
3.92352	4.22193	1
3.68706	5.93898	2
4.95522	6.01725	2
13.1406	8.39249	3
-7.27399	7.65481	4
-7.18532	5.44395	4
-6.77484	4.34964	4
-5.36279	8.43034	4
-5.33844	8.54182	4
-0.502927	10.2349	3
1.10195	7.30491	3
-3.46706	8.69889	4
0.831159	6.81666	3
-0.382687	9.72564	3
4.1639	6.59873	2
1.17212	-1.74723	0
4.92563	6.78006	2
5.25529	5.21925	2
4.56311	1.59622	1
3.25806	0.775787	0
5.04562	2.81961	1
0.882196	8.41387	3
5.05262	3.93243	1
-3.87263	9.03087	4
2.48279	2.54102	1
3.50421	-0.366033	0
2.20752	0.156881	0
3.05877	0.711031	0
4.34603	6.00191	2
4.75166	2.90072	1
4.0905	1.84674	1
2.75984	5.94032	2
1.41894	7.07112	2
4.36013	1.64083	1
2.42111	3.5123	1
1.4831	7.46148	3
1.7863	5.83025	2
1.78953	-0.445874	0
5.00082	1.0561	1
6.21863	3.45899	1
4.25069	1.24253	1
5.06626	3.46039	1
0.610374	7.0646	3
1.20699	-1.81716	0
-0.506972	7.93325	3
3.46005	-0.030455	0
1.39196	-1.40053	0
1.99209	-0.21658	0
4.12693	4.4731	1
1.43103	9.26866	3
3.73207	6.36692	2
4.06286	2.7503	1
5.09847	3.29355	1
13.1241	8.41513	3
-7.23599	7.68325	4
-6.98613	5.53387	4
-6.95027	4.08547	4
-4.44907	8.57979	4
-2.91545	9.18305	3
-2.28029	8.34249	3
0.00760233	8.68395	3
-0.0423554	9.88326	3
1.6812	6.42695	2
0.410987	8.85953	3
4.07771	2.37757	1
1.61682	8.2107	3
3.83794	8.06852	2
5.31871	6.67115	2
2.27792	8.85954	2
2.60563	8.44572	2
5.94534	4.91677	2
0.334578	9.03738	3
5.04652	0.893186	1
-3.78307	8.38632	4
1.71292	6.16097	2
2.1319	-0.00450087	0
1.90829	-0.51532	0
1.86318	-0.1282	0
5.10464	3.51497	1
3.06262	3.14612	1
4.43844	1.84058	1
3.32162	2.96498	1
0.325999	8.02963	3
3.05745	3.10783	1
1.95655	2.05068	1
3.03339	6.56961	2
3.05033	4.42464	1
2.39688	-1.14078	0
3.76875	0.925317	1
4.65512	0.552687	1
4.30011	1.17384	1
4.82482	4.25913	1
-0.329955	8.68172	3
3.33598	0.266386	0
-0.939882	8.03957	3
3.91849	-0.796461	0
1.97623	0.391414	0
2.10069	0.429229	0
3.03701	2.06234	1
1.54311	8.87666	3
3.64284	7.48829	2
3.80131	-0.878096	0
2.61607	7.18372	2
13.1595	8.27802	3
-6.89972	7.39832	4
-7.05649	5.84044	4
-6.87427	4.16135	4
-4.19351	8.5088	4
-1.49982	9.41912	3
2.7919	6.43013	2
1.85099	8.24601	3
-2.5683	9.63465	3
2.7323	9.13354	3
1.10002	9.05052	3
2.82649	9.20603	3
-0.85116	9.77797	3
1.50072	8.82807	3
0.80536	10.2316	3
0.777215	9.72802	3
1.56354	10.3013	3
4.99266	6.01209	2
1.36114	10.452	3
4.9104	7.12021	2
-3.83517	8.32287	4
5.84331	3.21657	1
2.06847	0.235607	0
0.764922	-2.08344	0
1.91523	2.14799	1
3.9015	6.04485	2
3.44163	5.04971	1
3.62854	8.48383	2
1.79492	7.97401	3
0.910056	-1.96054	0
3.39881	7.16353	2
2.22437	0.146873	0
-0.11254	9.34225	3
2.98307	4.79863	2
3.65467	4.54522	1
1.97888	-1.96602	0
3.99261	1.02594	1
4.94353	5.38043	2
4.74796	0.491505	1
1.30383	8.51738	3
4.16245	4.40563	1
-3.15858	8.97467	3
4.45394	5.42115	2
2.43987	2.76382	1
1.44559	-1.30066	0
1.71677	-0.335283	0
3.66969	7.96491	2
5.30881	3.69722	1
4.31474	9.53226	2
0.0552278	10.0468	3
13.0069	7.85793	3
-7.07463	7.79328	4
-7.08135	6.23324	4
-6.97075	4.02828	4
-6.61358	6.75252	4
-4.29884	9.0055	4
-1.29616	8.22949	3
-2.25476	9.24595	3
-4.33651	8.45799	4
2.63765	7.74999	3
-2.14926	8.55441	3
1.48032	9.84257	3
-0.218424	8.55122	3
1.22784	6.06067	2
0.0631477	6.48992	3
-0.321458	6.46189	3
-0.00911941	5.99106	3
4.99652	8.10108	2
0.488658	9.28504	3
2.24888	9.52573	3
-4.01135	8.2412	4
6.34274	7.16195	2
2.59024	-0.278554	0
2.59574	-0.0555025	0
2.58596	0.142679	0
3.01266	-0.574505	0
4.93677	3.11778	1
3.65917	8.13109	2
0.234727	8.37105	3
1.99235	5.3225	1
3.4188	6.48426	2
2.47769	-0.169891	0
-0.0089153	8.50143	3
2.87874	4.63081	2
5.5193	2.95207	1
3.27137	4.13954	1
3.93837	2.04718	1
5.17507	5.28906	2
4.9666	4.2656	1
-0.576844	9.68766	3
4.67953	7.88228	2
-2.43854	9.39371	3
4.06976	5.53282	2
2.60618	-0.10144	0
2.10748	2.44139	1
2.53446	3.10932	1
4.43446	0.585622	1
5.7085	4.36196	1
3.67407	8.55637	2
-1.15898	8.32631	3
12.8583	7.65441	3
-6.84089	7.65088	4
-6.97789	6.38425	4
-6.84038	3.97944	4
-6.93644	6.6348	4
-5.32385	8.4459	4
-3.06809	8.39172	3
0.25699	7.87409	3
-4.49112	8.5486	4
-2.02889	9.79552	3
-1.80413	8.05132	3
-1.50258	7.87342	3
-2.56956	9.03624	3
-0.922778	7.47063	3
-0.465421	7.605	3
0.334867	6.49704	1
-0.0605584	5.97789	3
5.08558	8.02626	2
-1.9899	8.76297	3
1.93491	10.6559	2
-2.84589	8.40935	3
5.73102	7.3247	2
4.78521	2.97272	1
4.20141	1.42505	1
2.87386	3.72336	1
3.59234	1.68047	1
4.15994	6.04895	2
1.70567	9.53634	3
-2.06717	9.06185	3
2.02277	5.6778	2
2.85575	5.35456	2
3.20698	2.49117	1
0.56833	7.46943	3
2.27331	7.73486	3
5.55918	5.42294	2
3.21047	4.23422	1
4.82376	5.03023	2
6.57859	4.21948	1
3.33354	6.91535	2
2.00585	8.79647	3
4.17337	7.79176	2
-2.46355	8.90841	3
5.58414	6.64244	2
3.33857	0.573579	1
3.13813	1.23232	1
3.91183	5.43601	2
3.15162	2.32706	1
5.58836	4.37136	1
3.10215	9.3075	2
-0.251458	9.22988	3
12.8229	7.58529	3
-7.01704	7.54376	4
-7.14686	5.62306	4
-6.73828	3.70917	4
-6.85462	7.00681	4
-5.64721	8.22173	4
-5.11541	8.7509	4
-1.37229	8.098	3
-4.59299	8.48983	4
-1.45576	8.2737	3
-1.60554	8.51132	3
-1.18567	9.62013	3
-0.0562047	7.96432	3
-0.164201	7.86111	3
-2.27132	9.10297	3
-0.471758	6.64496	3
0.318016	5.94144	3
4.25927	3.20949	1
0.654899	10.2085	3
1.8049	10.7246	3
-3.40949	8.63753	4
6.02889	7.2793	2
3.95324	4.90392	2
4.9783	0.761522	1
3.96371	1.44923	1
4.0879	1.72106	1
3.347	7.58659	2
1.82894	9.55605	3
-0.625625	9.37644	3
1.4931	6.72462	2
2.87654	6.93707	2
1.71609	7.12654	2
-0.629406	7.97055	3
3.40035	3.05315	1
4.43576	9.58759	2
2.14112	6.77741	2
5.91618	5.35594	2
6.59138	4.25118	1
3.26722	7.00505	2
2.83492	8.47669	3
2.82684	4.38136	1
1.40605	8.14066	3
5.17743	6.15927	2
2.76678	-0.000103172	0
4.24566	1.5575	1
3.58477	6.12758	2
5.30211	4.98111	1
3.98205	5.03566	2
3.83939	8.57762	2
-0.968305	8.4601	3
12.9333	7.73558	3
-7.08736	7.68841	4
-7.08544	6.24085	4
-6.70775	3.56356	4
-6.95657	7.64309	4
-6.19072	7.94067	4
-3.95663	9.29502	3
-1.62347	10.9087	3
-4.71535	8.46434	4
-2.71575	8.69565	3
-2.37469	9.4351	3
-1.72518	9.79144	3
-2.16678	9.85681	3
-0.903556	7.36301	3
-0.289131	7.25732	3
0.462152	6.16775	1
0.756575	9.28533	3
4.17074	3.36899	1
2.19393	8.35449	3
1.74658	10.5876	3
-1.56584	7.77551	3
6.34281	6.48561	2
4.48202	3.37435	1
6.10454	3.38362	1
5.15884	2.63108	1
3.6073	-0.732632	0
5.21205	5.9008	2
1.89761	9.77809	3
-1.46456	9.03929	3
1.85417	6.55136	2
0.900324	8.52589	3
2.9095	4.53149	1
0.0221092	8.1049	3
3.1044	5.22717	2
4.51329	9.71168	2
4.01236	5.14617	2
6.11725	5.05039	1
4.81327	5.4299	2
4.68979	1.31474	1
2.07175	8.38482	3
4.93099	7.3842	2
1.86069	8.03334	3
5.49868	4.27735	1
2.77687	-0.134279	0
3.85101	2.71623	1
5.09843	5.80241	2
3.05724	6.77864	2
2.11209	-1.93736	0
3.57288	8.77212	2
-1.02716	8.83201	3
13.085	8.00319	3
-7.48326	7.45073	4
-7.12314	5.50788	4
-6.60799	3.44455	4
-6.23927	7.61196	4
-6.08976	7.84114	4
-4.60675	8.98189	4
-1.40042	10.7391	3
-4.61979	8.67199	4
-3.04114	8.69125	4
-2.07825	9.83853	3
-0.995107	9.9059	3
-2.46229	9.79413	3
-0.920635	7.13548	3
-0.450864	6.74969	3
1.05256	9.08229	3
1.96988	9.06147	3
4.6986	6.4358	2
3.10948	8.54268	2
2.33494	9.62332	3
0.528774	8.47066	3
5.92868	3.78176	1
3.9655	5.01223	2
3.75748	2.82476	1
5.19732	2.68013	1
5.28402	5.56041	2
2.13028	8.07544	3
3.41678	8.60409	2
-1.15775	8.96526	3
3.04601	-1.16533	0
1.9708	7.68108	2
4.65523	6.35099	2
2.40218	3.87505	1
2.39882	6.7568	2
5.59794	5.36746	2
3.68965	3.79884	1
5.92962	5.35908	2
4.34958	0.439225	0
3.14877	7.23432	2
0.626724	8.16274	3
4.34439	7.81936	2
1.0608	7.67722	3
4.70863	1.27847	1
3.51402	-0.015137	0
3.06774	0.950525	1
4.20055	7.67361	2
2.34124	8.74345	2
2.88403	3.39702	1
2.59793	8.62132	2
0.176674	8.78782	3
13.2511	8.3007	3
-7.40919	7.47025	4
-7.09456	6.10859	4
-6.56548	3.36969	4
-6.16166	7.21597	4
-5.69087	8.18688	4
-4.23826	9.12501	4
-1.71866	10.7249	3
-3.67585	9.12089	4
-1.67535	8.48254	3
-1.66605	8.02984	3
1.79614	9.67502	3
0.208542	9.99376	3
0.588037	10.1685	3
1.52103	10.1857	3
5.60653	6.88957	2
4.16038	5.84311	2
3.84049	4.77388	2
4.36271	9.54347	2
3.69458	7.60908	2
-3.16958	8.38087	4
2.29062	2.87329	1
3.98582	4.21292	1
3.05625	-1.04957	0
5.10262	2.55402	1
4.0198	7.51006	2
4.03454	6.03645	2
4.10644	7.85239	2
1.64778	6.54996	2
4.27003	1.54127	1
1.88332	7.48519	2
2.9541	0.164077	0
1.52349	7.71885	3
3.04525	0.854967	1
2.68371	-0.68791	0
3.84161	3.70856	1
6.07033	5.86631	2
4.38873	1.02054	1
5.20474	3.4937	1
0.0333946	8.0264	3
4.28157	4.21904	1
-1.46981	9.24094	3
3.44311	0.126425	0
2.03733	1.60413	1
2.97813	-1.20729	0
6.51964	3.84188	1
0.975258	9.58348	3
4.42852	5.12215	2
2.90764	7.841	2
3.89961	6.0819	2
13.3127	8.27914	3
-7.24651	7.77315	4
-7.1579	5.24584	4
-6.54655	3.33554	4
-5.93143	7.90805	4
-5.39262	8.45657	4
-0.317848	10.1708	3
-2.5612	8.56787	3
-1.66146	7.87376	3
-1.31491	8.57171	3
-0.927816	8.50326	3
4.01987	6.31234	2
3.15044	5.36875	2
4.59339	7.89445	2
3.63101	6.47945	2
2.34917	-0.0271891	0
2.99685	0.544686	0
5.29071	2.78574	1
1.74695	7.00253	2
3.99442	5.65682	2
-3.82096	8.83803	4
2.31199	1.8717	1
2.71769	0.319551	0
2.20664	-0.318011	0
3.11855	2.20314	1
3.98509	7.50076	2
3.57435	5.18673	1
4.85245	1.01834	1
2.7777	4.38113	1
3.53573	-0.753468	0
3.25441	0.442943	0
2.02737	2.27611	1
2.14169	6.40698	2
2.67592	3.47039	1
2.04896	-0.0545048	0
3.56341	-1.01579	0
6.43431	3.67001	1
2.54449	3.25277	1
3.41357	7.59849	2
0.802619	6.88563	3
3.43003	0.330325	1
-0.6001	8.11244	3
2.60547	2.80016	1
0.885244	-1.97899	0
1.25915	-1.66312	0
4.59388	3.87254	1
1.2358	9.51152	3
5.5367	6.94411	2
3.69223	5.29639	2
2.05762	-2.01658	0
12.8284	7.62158	3
-7.2714	7.75941	4
-7.12389	5.37012	4
-6.52732	3.33332	4
-4.51883	8.48214	4
-3.77779	9.24284	4
-2.59549	8.60081	3
-0.13601	8.84155	3
0.864153	-1.96671	0
0.0535106	9.27379	3
2.11882	7.6593	2
3.68399	6.04769	2
1.61213	8.17749	3
3.63241	8.36477	2
4.84421	6.8755	2
3.77031	8.17079	2
3.46948	7.58597	2
4.46615	9.52496	2
2.01973	8.60594	3
2.49185	3.16315	1
-3.92218	8.34356	4
3.2715	4.16603	1
2.07022	2.60222	1
2.21308	0.364112	0
1.89958	-0.574495	0
4.87902	7.24818	2
2.95941	2.35823	1
4.49013	4.39005	1
2.42601	5.14877	1
1.73767	7.33875	2
3.39989	3.32258	1
3.73434	1.08993	1
4.06188	1.49567	1
3.23799	1.81141	1
3.04971	2.03323	1
3.58071	2.05985	1
4.3574	5.43337	2
4.4542	0.575046	1
5.33583	5.12104	2
1.42219	8.03406	3
3.40591	0.285337	0
-0.868988	8.28684	3
2.98392	2.82348	1
1.40729	-1.42608	0
1.8892	0.432692	0
2.25695	2.91681	1
3.10488	6.39376	2
3.65817	7.69434	2
5.44647	5.51492	2
1.31357	8.21308	3
12.8313	7.60858	3
-7.13155	7.62221	4
-7.13412	5.793	4
-6.65152	3.54119	4
-4.2744	8.48794	4
-1.72546	9.60346	3
2.49038	9.48217	3
2.07865	9.28916	3
2.06243	-2.04949	0
2.54585	9.30337	3
-1.493	7.87833	3
2.67838	9.15307	3
-0.0176987	9.89022	3
1.76871	9.28198	3
0.808237	10.2555	3
0.616517	9.33712	3
1.36762	10.2198	3
6.36273	6.93752	2
2.5842	7.23209	2
3.56415	7.39556	2
-3.77384	8.4421	4
6.11671	5.61965	2
2.01181	0.208728	0
1.38056	-1.47123	0
1.99022	2.19164	1
4.58711	3.57766	1
4.7415	5.86206	2
5.36158	6.10728	2
-0.0476384	9.00472	3
-6.67349	3.50264	4
2.45043	7.98739	2
3.44699	1.66804	1
-1.52915	8.26214	3
2.11472	6.93517	2
3.30739	4.13574	1
2.8016	4.30531	1
3.50674	4.55663	1
4.72163	0.151616	0
4.85536	4.3804	1
-1.10159	9.27114	3
4.42986	4.71317	2
-3.63354	8.7786	4
3.86476	5.80228	2
1.9653	2.18176	1
1.52427	-1.05675	0
2.43133	0.762541	0
2.11185	0.038355	0
3.37379	6.89684	2
5.84439	6.04142	2
-0.0589547	10.0185	3
12.7462	7.51988	3
-7.26019	7.7546	4
-6.97644	5.98686	4
-6.93089	4.09811	4
-6.78847	6.70009	4
-4.65746	8.74984	4
-1.77624	8.32107	3
-1.80373	9.22476	3
-4.44179	8.37243	4
-0.799394	9.80055	3
-0.691877	9.62488	3
1.91694	9.73232	3
-2.25435	8.87192	3
-0.777972	7.1155	3
-0.607746	6.77864	3
-0.0367248	6.37056	3
0.639313	5.95866	1
3.18373	8.70247	2
0.870915	9.88362	3
2.32571	9.82205	2
-4.06002	8.36956	4
4.96448	7.95018	2
2.7526	-0.926435	0
3.57686	-0.110277	0
3.07003	1.86083	1
3.7726	2.56403	1
3.5332	5.70206	2
2.97871	9.40637	2
-1.68808	9.17534	3
1.0274	7.75359	3
4.10488	6.91874	2
3.5583	0.113431	0
-1.73801	8.86254	3
3.32714	3.15283	1
5.23519	3.17923	0
3.62861	3.03949	1
1.85108	6.02257	2
6.57887	4.05939	1
4.53354	1.22754	1
-0.314456	9.75135	3
5.78504	4.49538	2
-0.846308	10.3946	3
5.47081	6.9026	2
1.46725	-1.48662	0
2.39071	0.886746	1
2.87995	2.30471	1
4.20084	2.27291	1
3.00028	4.73067	2
4.06089	9.40184	2
-0.852475	9.18994	3
12.6887	7.46828	4
-6.70887	7.69511	4
-6.99589	5.93969	4
-6.93562	4.02259	4
-6.97794	6.44828	4
-5.43055	8.36937	4
-3.16749	9.47029	3
-0.548854	9.25069	3
-4.6007	8.47864	4
-2.10605	9.69021	3
-1.86356	8.42193	3
-1.44134	9.79675	3
-2.38658	9.14145	3
-0.725143	7.4475	3
-2.15848	9.08431	3
-0.359893	6.63317	3
-0.102766	6.06783	3
4.84218	8.20107	2
0.860648	9.71158	3
1.9133	10.7609	1
-1.82944	8.01812	3
6.34312	7.20017	2
3.96019	4.92817	2
3.04237	2.40294	1
2.41099	-0.0422828	0
4.09816	1.50692	1
5.33871	5.27285	2
1.77516	9.78689	3
-1.95495	9.02355	3
0.864264	6.82996	2
1.43231	8.2281	2
2.89112	3.33344	1
0.359122	7.35475	3
2.23128	8.09377	3
5.31822	3.14073	1
3.65358	3.95089	1
3.6559	4.67969	1
6.52346	4.33316	2
3.97783	7.35312	2
2.34397	8.64623	3
4.00325	7.21605	2
-3.53732	8.92567	3
5.45449	7.05116	2
3.10574	0.317949	1
3.2854	1.81614	1
3.4636	4.31482	1
3.02503	2.23409	1
5.68151	4.42984	2
1.47153	8.98459	3
-0.34084	9.08026	3

## Sheet: FigS7_raw
Number of Suggestions	Expert 1, Raw Accuracy	Expert 2, Raw Accuarcy	Expert 3, Raw Accuracy
20	0.55	0.6	0.65
40	0.55	0.65	0.675
60	0.466667	0.55	0.583333
80	0.4	0.475	0.5125
100	0.43	0.48	0.51
120	0.416667	0.466667	0.491667
140	0.385714	0.442857	0.464286
160	0.35625	0.425	0.44375
180	0.338889	0.405556	0.433333
200	0.335	0.405	0.43
220	0.327273	0.390909	0.418182
240	0.316667	0.383333	0.4125
260	0.311538	0.380769	0.411538
280	0.3	0.371429	0.4
300	0.296667	0.37	0.396667

## Sheet: FigS7_AINERD
Number of Suggestions	Expert 1, AI-NERD Accuracy	Expert 2, AI-NERD Accuracy	Expert 3, AI-NERD Accuracy
20	0.85	0.85	0.95
40	0.65	0.75	0.825
60	0.55	0.75	0.816667
80	0.5	0.7	0.7625
100	0.5	0.71	0.77
120	0.491667	0.7	0.75
140	0.478571	0.664286	0.707143
160	0.44375	0.63125	0.6875
180	0.416667	0.594444	0.661111
200	0.4	0.57	0.63
220	0.4	0.563636	0.618182
240	0.391667	0.55	0.608333
260	0.376923	0.530769	0.588462
280	0.360714	0.507143	0.564286
300	0.343333	0.49	0.543333

## Sheet: FigS8
Latent Dimension	Mean MSE on Test Data	Std. Dev. of MSE on Test Data
2	0.0268845	0.0161402
8	0.00968861	0.00606702
16	0.0059394	0.00298389
32	0.00497158	0.00235392
64	0.00438572	0.00207012
128	0.00422998	0.00194256
256	0.00415331	0.001955
512	0.00408209	0.00189417
1024	0.00407897	0.00196321
